# Supplementary material for: Commensal microbiota modulates phenotypic characteristics and gene expression in piglet Peyer’s patches
Source: Front Physiol. 2023 Mar 22;14:1084332. doi: 10.3389/fphys.2023.1084332 (PMC10073539; doi:10.3389/fphys.2023.1084332)
Supplement: Supplementary file 1 [file Table2.XLSX]

## Sheet: JPP（SPF vs. GF）
id	GF1_JPP	GF2_JPP	GF3_JPP	SPF1_JPP	SPF2_JPP	SPF3_JPP	GF1_JPP_CPM	GF2_JPP_CPM	GF3_JPP_CPM	SPF1_JPP_CPM	SPF2_JPP_CPM	SPF3_JPP_CPM	GF_JPP_mean	SPF_JPP_mean	log2(fc)	PValue	FDR
ENSSSCG00000000002	431.213	840.259	1259.44	1333.67	2689.88	1580.68	11.01	14.55	26.57	31.07	45.38	29.31	17.3767	35.2533	1.02061	0.00883873	0.039996
ENSSSCG00000000006	83.9249	427.468	383.263	741.555	986.616	1856.85	2.14	7.4	8.09	17.27	16.64	34.43	5.87667	22.78	1.9547	0.00012098	0.00176285
ENSSSCG00000000040	383.105	273.682	277.54	976.637	1270.55	524.273	9.79	4.74	5.86	22.75	21.43	9.72	6.79667	17.9667	1.40242	0.00190858	0.0133579
ENSSSCG00000000046	1278.62	6521.03	2587.59	471.72	191.596	677.672	32.66	112.93	54.59	10.99	3.23	12.57	66.7267	8.93	-2.90153	7.99774e-08	5.32213e-06
ENSSSCG00000000068	893.043	2583.44	2560.73	4774.63	8186.99	7578.36	22.81	44.74	54.02	111.22	138.11	140.53	40.5233	129.953	1.68117	5.38072e-06	0.000156078
ENSSSCG00000000075	381.946	1634.89	1411.98	2758.44	3852.19	2400.16	9.76	28.31	29.79	64.25	64.98	44.51	22.62	57.9133	1.3563	0.00101267	0.00853729
ENSSSCG00000000078	316.628	851.22	749.647	1108.25	2201.47	1890.06	8.09	14.74	15.81	25.81	37.14	35.05	12.88	32.6667	1.34269	0.000269814	0.00320991
ENSSSCG00000000091	751.398	874.824	765.394	1441.93	2627.41	1690.09	19.19	15.15	16.15	33.59	44.32	31.34	16.83	36.4167	1.11356	0.000753052	0.00687882
ENSSSCG00000000133	11019.9	9004.22	7576.48	3472.07	4567.47	4716.09	281.47	155.93	159.84	80.88	77.05	87.45	199.08	81.7933	-1.28329	0.000255516	0.00307509
ENSSSCG00000000136	1605.17	2480.87	2833.29	5046.79	8188.95	5516.17	41	42.96	59.77	117.56	138.14	102.29	47.91	119.33	1.31656	5.2353e-05	0.000951066
ENSSSCG00000000142	143.074	296.845	253.902	508.767	835.463	529.377	3.65	5.14	5.36	11.85	14.09	9.82	4.71667	11.92	1.33754	0.00097205	0.00828168
ENSSSCG00000000145	190.795	1580.75	2027.16	4023.12	7552.01	5329.93	4.87	27.37	42.77	93.71	127.4	98.84	25.0033	106.65	2.09269	0.00015057	0.00207496
ENSSSCG00000000146	21761.1	73984.7	52423.6	20472.7	26551.7	23441.9	555.83	1281.2	1105.95	476.88	447.91	434.69	980.993	453.16	-1.11422	0.00286594	0.0180393
ENSSSCG00000000164	244.646	703.695	727.689	1200.71	1704.22	1571.77	6.25	12.19	15.35	27.97	28.75	29.15	11.2633	28.6233	1.34556	0.000457774	0.00481941
ENSSSCG00000000195	658.41	1257.39	1193.98	412.862	678.618	368.098	16.82	21.77	25.19	9.62	11.45	6.83	21.26	9.3	-1.19284	0.00142106	0.01075
ENSSSCG00000000199	448.677	794.227	775.862	1209	2325.87	1568.39	11.46	13.75	16.37	28.16	39.24	29.08	13.86	32.16	1.21434	0.000366613	0.00413611
ENSSSCG00000000214	4701.07	5095.35	3699.78	1649.3	1376.43	2558.25	120.08	88.24	78.05	38.42	23.22	47.44	95.4567	36.36	-1.39249	7.98892e-05	0.00129614
ENSSSCG00000000223	590.622	1242.97	976.762	2842.03	5409.38	2637.11	15.09	21.52	20.61	66.2	91.25	48.9	19.0733	68.7833	1.8505	1.18255e-07	7.14352e-06
ENSSSCG00000000261	751.894	433.82	474.544	217.863	253.575	170.551	19.21	7.51	10.01	5.07	4.28	3.16	12.2433	4.17	-1.55388	0.000814106	0.00728306
ENSSSCG00000000265	201.764	600.855	795.023	1430.24	3445.72	1979.57	5.15	10.41	16.77	33.32	58.13	36.71	10.7767	42.72	1.987	5.84405e-06	0.000166415
ENSSSCG00000000272	155.233	765.573	790.142	1551.13	2910.55	2823.49	3.97	13.26	16.67	36.13	49.1	52.36	11.3	45.8633	2.02102	1.17302e-05	0.000297899
ENSSSCG00000000295	2943.92	2655.42	3026.27	6295.78	11667.1	7733.54	75.19	45.98	63.84	146.65	196.82	143.41	61.67	162.293	1.39596	5.10887e-05	0.000933288
ENSSSCG00000000298	8948.82	9783.18	4363.38	3208.7	2286.52	2895.11	228.57	169.42	92.05	74.74	38.57	53.69	163.347	55.6667	-1.55305	0.000125271	0.00180904
ENSSSCG00000000362	631.934	659.357	734.815	136.051	108.492	242.474	16.14	11.42	15.5	3.17	1.83	4.5	14.3533	3.16667	-2.18035	1.32412e-06	5.14918e-05
ENSSSCG00000000379	758.438	2252.26	2131.99	3405.1	6459.22	4085.69	19.37	39	44.98	79.32	108.96	75.76	34.45	88.0133	1.35322	0.000210361	0.0026522
ENSSSCG00000000386	420.676	1057.2	1068.3	1855.29	2435.88	2504.46	10.75	18.31	22.54	43.22	41.09	46.44	17.2	43.5833	1.34137	0.000144517	0.00200487
ENSSSCG00000000396	1208.55	4139.27	5808.78	5967.5	11090.4	16467	30.87	71.68	122.54	139	187.09	305.35	75.03	210.48	1.48814	0.00158766	0.0116628
ENSSSCG00000000399	283.346	618.747	879.461	1038.43	2669.75	1439.4	7.24	10.71	18.55	24.19	45.04	26.69	12.1667	31.9733	1.39394	0.000829236	0.00738127
ENSSSCG00000000403	1044.33	2940.2	2769.77	4468.77	7167.36	6408.09	26.67	50.92	58.43	104.09	120.91	118.83	45.34	114.61	1.33788	0.000160314	0.00217315
ENSSSCG00000000457	392.288	1219.12	1334.52	2663.49	4492.59	4888.8	10.02	21.11	28.15	62.04	75.79	90.66	19.76	76.1633	1.94651	7.88295e-07	3.41796e-05
ENSSSCG00000000483	133.055	310.695	331.68	526.185	913.353	791.186	3.4	5.38	7	12.26	15.41	14.67	5.26	14.1133	1.42392	0.000558914	0.00556855
ENSSSCG00000000486	467.941	1182.16	1220.79	1611.73	2951.49	2104.39	11.95	20.47	25.75	37.54	49.79	39.02	19.39	42.1167	1.11908	0.00182812	0.0129624
ENSSSCG00000000493	24.0968	122.854	178.264	299.839	552.731	521.521	0.62	2.13	3.76	6.98	9.32	9.67	2.17	8.65667	1.99612	0.000468343	0.00489753
ENSSSCG00000000509	904.189	2043.94	1828.51	3064.32	3196.3	3957.18	23.1	35.4	38.57	71.38	53.92	73.38	32.3567	66.2267	1.03335	0.00177059	0.0126409
ENSSSCG00000000522	6377.66	8258.99	7928.72	13366.5	27822.7	17300.1	162.9	143.02	167.27	311.35	469.36	320.8	157.73	367.17	1.21899	0.000286656	0.00338118
ENSSSCG00000000545	88.7649	349.78	391.846	589.674	906.678	956.256	2.27	6.06	8.27	13.74	15.3	17.73	5.53333	15.59	1.4944	0.00151754	0.011254
ENSSSCG00000000546	129.054	138.683	124.97	385.574	1275.28	753.391	3.3	2.4	2.64	8.98	21.51	13.97	2.78	14.82	2.41439	1.00257e-07	6.36531e-06
ENSSSCG00000000555	396.295	1458.86	1298.55	2801.7	4489.58	5839.12	10.12	25.26	27.39	65.26	75.74	108.28	20.9233	83.0933	1.98962	8.23808e-07	3.54722e-05
ENSSSCG00000000563	1880.47	1162.43	1409.37	6409.17	16480.8	11605.6	48.03	20.13	29.73	149.29	278.02	215.21	32.63	214.173	2.71451	5.60342e-11	1.31564e-08
ENSSSCG00000000571	164.163	250.749	274.297	371.848	655.398	520.146	4.19	4.34	5.79	8.66	11.06	9.65	4.77333	9.79	1.03631	0.0104246	0.0453934
ENSSSCG00000000580	183.678	686.565	898.402	1287.11	2291.3	1529.84	4.69	11.89	18.95	29.98	38.65	28.37	11.8433	32.3333	1.44895	0.0012477	0.00986424
ENSSSCG00000000587	560.887	1194.74	1053.96	1504.39	2804.64	2273.09	14.33	20.69	22.23	35.04	47.31	42.15	19.0833	41.5	1.1208	0.000760267	0.00692082
ENSSSCG00000000610	67.2412	131.322	70.1476	40.0289	28.7252	47.8535	1.72	2.27	1.48	0.93	0.48	0.89	1.82333	0.766667	-1.24991	0.0104291	0.0453934
ENSSSCG00000000612	984.488	1858.43	1888.25	2903.39	5491.55	4083.64	25.15	32.18	39.84	67.63	92.64	75.72	32.39	78.6633	1.28014	7.3696e-05	0.0012244
ENSSSCG00000000625	92.2419	404.977	398.309	695.166	1455.07	1812.25	2.36	7.01	8.4	16.19	24.55	33.61	5.92333	24.7833	2.06489	2.16145e-05	0.000472708
ENSSSCG00000000642	1.89941	0	7.18827	9.43431	36.6933	13.9082	0.05	0	0.15	0.22	0.62	0.26	0.0666667	0.366667	2.45943	0.00121404	0.00972212
ENSSSCG00000000653	708.443	522.587	441.43	1489.9	1789.56	1620.79	18.1	9.05	9.31	34.7	30.19	30.06	12.1533	31.65	1.38085	0.000203427	0.00259104
ENSSSCG00000000667	81.6314	72.9933	193.399	1687.71	7015.28	4293.01	2.09	1.26	4.08	39.31	118.34	79.61	2.47667	79.0867	4.99696	3.28659e-20	2.04491e-16
ENSSSCG00000000687	1253.1	1325.77	1023.51	2181.59	2998.25	3111.54	32.01	22.96	21.59	50.82	50.58	57.7	25.52	53.0333	1.05527	0.000949101	0.00813964
ENSSSCG00000000693	777.868	2109.61	2673.37	3565.57	7577.38	4744.78	19.87	36.53	56.4	83.05	127.83	87.98	37.6	99.62	1.4057	0.000332498	0.00383112
ENSSSCG00000000697	3994.6	7752.78	7534.3	10794.4	21616	14291.8	102.03	134.26	158.95	251.44	364.65	265.02	131.747	293.703	1.15659	0.00072571	0.0067143
ENSSSCG00000000705	625.917	753.049	475.382	1396.36	2091.67	1165.6	15.99	13.04	10.03	32.53	35.29	21.61	13.02	29.81	1.19507	0.000851344	0.00753494
ENSSSCG00000000722	164.334	512.99	647.277	933.667	1511.96	1204.6	4.2	8.88	13.66	21.75	25.51	22.34	8.91333	23.2	1.38009	0.00134173	0.0103576
ENSSSCG00000000728	197.27	311.628	339.908	461.538	631.204	1448.78	5.04	5.4	7.17	10.75	10.65	26.87	5.87	16.09	1.45473	0.00143948	0.0108563
ENSSSCG00000000732	124.687	587.959	637.424	860.56	1477.32	1282.52	3.18	10.18	13.45	20.05	24.92	23.78	8.93667	22.9167	1.35859	0.00370456	0.0216633
ENSSSCG00000000753	282.331	1902.52	2204.13	5538.92	13104.7	9936.08	7.21	32.95	46.5	129.02	221.07	184.25	28.8867	178.113	2.62432	1.12218e-06	4.50464e-05
ENSSSCG00000000754	88.8545	289.929	292.379	407.908	581.558	586.711	2.27	5.02	6.17	9.5	9.81	10.88	4.48667	10.0633	1.16539	0.0108019	0.04656
ENSSSCG00000000755	453.414	1166.27	1002.29	1359.86	2289.03	2097.27	11.58	20.2	21.14	31.68	38.61	38.89	17.64	36.3933	1.04482	0.00272181	0.0173338
ENSSSCG00000000766	99.7473	281.619	236.968	402.838	893.811	651.041	2.55	4.88	5	9.38	15.08	12.07	4.14333	12.1767	1.55526	0.000372649	0.0041777
ENSSSCG00000000778	179.782	164.268	148.267	741.536	1257.25	656.843	4.59	2.84	3.13	17.27	21.21	12.18	3.52	16.8867	2.26224	7.83699e-08	5.27154e-06
ENSSSCG00000000783	5.03741	29.9732	42.7837	104.063	164.453	218.042	0.13	0.52	0.9	2.42	2.77	4.04	0.516667	3.07667	2.57406	1.84357e-05	0.000417837
ENSSSCG00000000784	66.0308	343.381	484.065	1260.39	2119.66	1461.98	1.69	5.95	10.21	29.36	35.76	27.11	5.95	30.7433	2.36931	5.64216e-06	0.000161405
ENSSSCG00000000804	2472.28	11341.7	6624.63	12951.7	17372.4	27895.2	63.15	196.41	139.76	301.69	293.06	517.27	133.107	370.673	1.47757	0.000610802	0.00593814
ENSSSCG00000000806	1253.61	3057.25	3065.18	4818.36	9303.99	7819.69	32.02	52.94	64.66	112.24	156.95	145	49.8733	138.063	1.46899	3.89785e-05	0.000763778
ENSSSCG00000000816	181.654	320.071	378.605	507.782	887.638	774.039	4.64	5.54	7.99	11.83	14.97	14.35	6.05667	13.7167	1.17933	0.00287004	0.0180446
ENSSSCG00000000837	282.209	383.173	447.824	779.57	1136.2	1004.98	7.21	6.64	9.45	18.16	19.17	18.64	7.76667	18.6567	1.26432	0.000562982	0.00559564
ENSSSCG00000000838	379.796	2076.7	1731.49	3007.86	4577.67	5235.58	9.7	35.96	36.53	70.06	77.22	97.09	27.3967	81.4567	1.57203	0.0003486	0.00397614
ENSSSCG00000000839	133.942	644.222	608.51	805.448	1290.16	1507.66	3.42	11.16	12.84	18.76	21.76	27.96	9.14	22.8267	1.32045	0.00429209	0.0239081
ENSSSCG00000000840	550.267	1760.68	1559.17	2220.25	3761.32	4000.48	14.06	30.49	32.89	51.72	63.45	74.18	25.8133	63.1167	1.2899	0.000492127	0.0050864
ENSSSCG00000000859	30.4109	107.632	179.774	196.107	419.385	362.782	0.78	1.86	3.79	4.57	7.07	6.73	2.14333	6.12333	1.51446	0.00615491	0.0308233
ENSSSCG00000000862	504.38	1355.13	1505.11	2333	4469.34	3283.69	12.88	23.47	31.75	54.34	75.4	60.89	22.7	63.5433	1.48505	6.49108e-05	0.00110955
ENSSSCG00000000869	174.146	658.393	954.031	1171.8	2192.64	1854.52	4.45	11.4	20.13	27.29	36.99	34.39	11.9933	32.89	1.45542	0.00169167	0.0122248
ENSSSCG00000000875	221.831	570.532	562.205	574.714	4425.81	724.229	5.67	9.88	11.86	13.39	74.66	13.43	9.13667	33.8267	1.88842	0.00149686	0.0111272
ENSSSCG00000000884	390.883	1541.41	1893.91	2185.84	3657.96	3171.66	9.98	26.69	39.95	50.92	61.71	58.81	25.54	57.1467	1.16191	0.0066907	0.0326891
ENSSSCG00000000887	345.048	1035.82	1426.32	1750.54	3690.9	2796.25	8.81	17.94	30.09	40.78	62.26	51.85	18.9467	51.63	1.44627	0.000539448	0.00539188
ENSSSCG00000000907	585.588	1273.67	1365.8	3161.13	6031.51	4040.87	14.96	22.06	28.81	73.63	101.75	74.93	21.9433	83.4367	1.9269	3.24301e-08	2.57045e-06
ENSSSCG00000000926	164.594	568.427	605.791	820.712	1156.83	997.25	4.2	9.84	12.78	19.12	19.52	18.49	8.94	19.0433	1.09094	0.0110755	0.0473783
ENSSSCG00000000927	44.0766	148.819	250.573	332.543	457.21	609.281	1.13	2.58	5.29	7.75	7.71	11.3	3	8.92	1.57208	0.00348907	0.0206851
ENSSSCG00000000939	280.431	590.697	485.464	1491.02	3446.94	2018.38	7.16	10.23	10.24	34.73	58.15	37.43	9.21	43.4367	2.23764	7.46727e-10	1.23897e-07
ENSSSCG00000000941	165.723	282.346	185.152	376.295	565.3	522.606	4.23	4.89	3.91	8.77	9.54	9.69	4.34333	9.33333	1.10359	0.0055757	0.0288379
ENSSSCG00000000950	117.599	391.761	544.147	675.66	1117.72	766.58	3	6.78	11.48	15.74	18.86	14.22	7.08667	16.2733	1.19933	0.0107935	0.0465561
ENSSSCG00000000968	2413.03	5333.94	5011.63	8837.82	13468.1	8882.98	61.63	92.37	105.73	205.86	227.2	164.72	86.5767	199.26	1.2026	0.000488829	0.00506072
ENSSSCG00000000983	593.63	285.149	202.452	1260	1579.05	869.016	15.16	4.94	4.27	29.35	26.64	16.11	8.12333	24.0333	1.56489	0.00150523	0.011176
ENSSSCG00000001040	6.94732	23.6803	73.0775	8.57071	6.05951	6.68635	0.18	0.41	1.54	0.2	0.1	0.12	0.71	0.14	-2.34239	0.00183735	0.0129939
ENSSSCG00000001049	130.213	765.326	918.236	1447.65	2385.46	2405.48	3.33	13.25	19.37	33.72	40.24	44.61	11.9833	39.5233	1.72168	0.000558301	0.00556855
ENSSSCG00000001065	148.188	568.772	384.427	908.882	1148.99	1500.82	3.79	9.85	8.11	21.17	19.38	27.83	7.25	22.7933	1.65256	8.59527e-05	0.00136951
ENSSSCG00000001068	149.874	593.052	393.955	139.382	118.604	166.336	3.83	10.27	8.31	3.25	2	3.08	7.47	2.77667	-1.42775	0.00334078	0.0200834
ENSSSCG00000001074	467.078	1261.7	1413.57	1972.4	5354.4	3870.93	11.93	21.85	29.82	45.94	90.33	71.78	21.2	69.35	1.70983	1.73528e-05	0.000403233
ENSSSCG00000001075	4551.93	7632.88	8641.5	10922.9	19826.1	14870	116.27	132.18	182.3	254.43	334.46	275.74	143.583	288.21	1.00523	0.00285633	0.017997
ENSSSCG00000001097	878.804	1124.59	1092.44	3826.76	7859.87	3956.11	22.45	19.47	23.05	89.14	132.59	73.36	21.6567	98.3633	2.18331	1.23869e-10	2.75255e-08
ENSSSCG00000001099	110.342	983.722	247.838	1149.52	2664.26	3436.96	2.82	17.04	5.23	26.78	44.94	63.73	8.36333	45.15	2.43258	1.86416e-05	0.000419435
ENSSSCG00000001131	93.8519	194.534	75.6917	448.702	712.253	558.472	2.4	3.37	1.6	10.45	12.02	10.36	2.45667	10.9433	2.15528	1.31485e-06	5.14528e-05
ENSSSCG00000001137	240.97	898.47	1053.51	1745.45	3034.6	2659.08	6.15	15.56	22.23	40.66	51.19	49.31	14.6467	47.0533	1.68372	7.44351e-05	0.00122685
ENSSSCG00000001202	11.0529	28.3495	73.0201	109.684	169.383	195.683	0.28	0.49	1.54	2.55	2.86	3.63	0.77	3.01333	1.96843	0.00091114	0.00795265
ENSSSCG00000001209	99.004	129.692	227.678	329.304	492.582	315.207	2.53	2.25	4.8	7.67	8.31	5.85	3.19333	7.27667	1.18821	0.00966258	0.04276
ENSSSCG00000001232	25.5679	7.23915	52.0245	100.221	134.198	150.281	0.65	0.13	1.1	2.33	2.26	2.79	0.626667	2.46	1.97289	0.00141445	0.0107326
ENSSSCG00000001252	1811.36	3755.22	10032.9	8430.08	17325.3	24538.7	46.27	65.03	211.66	196.36	292.27	455.03	107.653	314.553	1.54691	0.00292192	0.0182663
ENSSSCG00000001362	396.869	1014.53	1253.8	1715.69	2629.21	2201.85	10.14	17.57	26.45	39.96	44.35	40.83	18.0533	41.7133	1.20824	0.00127266	0.0100044
ENSSSCG00000001403	165.289	86.3805	44.7162	278.041	364.167	261.028	4.22	1.5	0.94	6.48	6.14	4.84	2.22	5.82	1.39046	0.0118569	0.0498301
ENSSSCG00000001409	3677.26	7507.09	7786.61	10879.9	18325.3	12287.4	93.93	130	164.27	253.43	309.14	227.85	129.4	263.473	1.02582	0.00285325	0.0179868
ENSSSCG00000001427	23978.5	32014.5	26771.5	55399.3	77767.1	54125.7	612.47	554.4	564.78	1290.43	1311.89	1003.68	577.217	1202	1.05825	0.00125349	0.00987868
ENSSSCG00000001437	230.118	298.433	314.146	659.545	824.047	640.187	5.88	5.17	6.63	15.36	13.9	11.87	5.89333	13.71	1.21807	0.00136091	0.0104732
ENSSSCG00000001459	1015.1	1461.55	1072.41	1477.02	5780.33	2273.95	25.93	25.31	22.62	34.4	97.51	42.17	24.62	58.0267	1.23689	0.00187892	0.0131948
ENSSSCG00000001493	317.431	739.982	745.401	873.551	2062.82	1260.11	8.11	12.81	15.73	20.35	34.8	23.37	12.2167	26.1733	1.09925	0.00397672	0.0227029
ENSSSCG00000001497	217.045	618.044	546.181	784.188	1804.95	1272.64	5.54	10.7	11.52	18.27	30.45	23.6	9.25333	24.1067	1.38139	0.000537088	0.00537261
ENSSSCG00000001518	181.068	2134.18	2473.87	3788.42	5541.16	4525.82	4.62	36.96	52.19	88.24	93.48	83.92	31.2567	88.5467	1.50227	0.00915996	0.0410762
ENSSSCG00000001532	43.5227	148.222	133.377	329.726	623.327	465.226	1.11	2.57	2.81	7.68	10.52	8.63	2.16333	8.94333	2.04756	1.75708e-05	0.000404909
ENSSSCG00000001552	395.88	75.7311	50.3438	28.8147	45.0599	60.1654	10.11	1.31	1.06	0.67	0.76	1.12	4.16	0.85	-2.29105	0.00253996	0.0164707
ENSSSCG00000001554	1648.09	3314.07	3502.37	4693.05	7814.03	6473.43	42.1	57.39	73.89	109.32	131.82	120.04	57.7933	120.393	1.05878	0.00138597	0.010568
ENSSSCG00000001611	353.859	1100.07	943.249	1287.32	2406.57	1729.64	9.04	19.05	19.9	29.99	40.6	32.07	15.9967	34.22	1.09707	0.00357096	0.0210123
ENSSSCG00000001629	6.07975	29.0646	43.8123	146.568	351.34	298.676	0.16	0.5	0.92	3.41	5.93	5.54	0.526667	4.96	3.23538	7.61459e-08	5.14978e-06
ENSSSCG00000001639	159.305	346.776	328.993	726.482	1406.74	1107.95	4.07	6.01	6.94	16.92	23.73	20.55	5.67333	20.4	1.8463	2.54865e-06	8.71303e-05
ENSSSCG00000001641	263.539	2159.54	1913.8	2877.03	4469.97	4522.13	6.73	37.4	40.37	67.02	75.41	83.86	28.1667	75.43	1.42115	0.00444048	0.0245261
ENSSSCG00000001646	303.115	775.933	693.811	1144.81	2152.94	1691.8	7.74	13.44	14.64	26.67	36.32	31.37	11.94	31.4533	1.39741	0.000117264	0.00171473
ENSSSCG00000001661	287.289	1384.25	1305.63	1783.05	3085.76	2089.84	7.34	23.97	27.54	41.53	52.06	38.75	19.6167	44.1133	1.16913	0.00710549	0.0341224
ENSSSCG00000001667	198.001	716.383	707.138	1221.67	2421.89	1863.39	5.06	12.41	14.92	28.46	40.86	34.55	10.7967	34.6233	1.68116	5.10098e-05	0.000933288
ENSSSCG00000001683	267.872	850.033	576.568	1677.53	4044.45	2578.99	6.84	14.72	12.16	39.08	68.23	47.82	11.24	51.71	2.2018	1.24496e-08	1.20096e-06
ENSSSCG00000001696	5558.4	3711.61	3313.07	2034.84	2816.37	2296.8	141.97	64.27	69.89	47.4	47.51	42.59	92.0433	45.8333	-1.00592	0.00507505	0.0270582
ENSSSCG00000001700	1200.57	2350.97	1660.31	3338.78	8763.78	3621.52	30.67	40.71	35.03	77.77	147.84	67.16	35.47	97.59	1.46013	5.42047e-05	0.00096918
ENSSSCG00000001710	205.497	463.699	452.449	1385.52	1177.47	973.122	5.25	8.03	9.55	32.27	19.86	18.05	7.61	23.3933	1.62013	5.42197e-05	0.00096918
ENSSSCG00000001724	5680.36	20254.2	6885.28	35329.4	45493.9	24071.4	145.09	350.74	145.25	822.94	767.46	446.37	213.693	678.923	1.66771	0.000100185	0.00153725
ENSSSCG00000001756	358.894	1844.98	1804.24	2406.54	4358.71	4246.92	9.17	31.95	38.06	56.06	73.53	78.75	26.3933	69.4467	1.39573	0.00175334	0.0125611
ENSSSCG00000001762	521.417	637.426	410.001	249.33	292.068	272.179	13.32	11.04	8.65	5.81	4.93	5.05	11.0033	5.26333	-1.06389	0.00754734	0.0356565
ENSSSCG00000001787	1851.78	1688.98	1282.99	3797.03	7290.01	3902.71	47.3	29.25	27.07	88.45	122.98	72.37	34.54	94.6	1.45357	3.48895e-05	0.000702531
ENSSSCG00000001801	65.2115	648.634	931.944	1178.7	1962.42	1796.6	1.67	11.23	19.66	27.46	33.11	33.32	10.8533	31.2967	1.52787	0.0100688	0.0442431
ENSSSCG00000001804	599.703	2294.66	548.421	184.306	96.397	710.407	15.32	39.74	11.57	4.29	1.63	13.17	22.21	6.36333	-1.80335	0.00572912	0.0293871
ENSSSCG00000001814	1281.88	5119.29	5978.42	9804.36	18920.7	14165.3	32.74	88.65	126.12	228.38	319.18	262.67	82.5033	270.077	1.71084	0.000111862	0.00166508
ENSSSCG00000001816	149.006	348.035	502.87	601.846	1488.47	1044.9	3.81	6.03	10.61	14.02	25.11	19.38	6.81667	19.5033	1.51658	0.000713436	0.00664521
ENSSSCG00000001837	399.282	667.631	787.677	1464.21	3239.92	2045.4	10.2	11.56	16.62	34.11	54.66	37.93	12.7933	42.2333	1.72299	1.42687e-06	5.4466e-05
ENSSSCG00000001869	57.8573	229.722	229.064	501.96	988.178	1195.53	1.48	3.98	4.83	11.69	16.67	22.17	3.43	16.8433	2.2959	3.0096e-06	9.80132e-05
ENSSSCG00000001888	129.413	132.039	161.975	227.419	511.14	313.496	3.31	2.29	3.42	5.3	8.62	5.81	3.00667	6.57667	1.12919	0.010223	0.0447151
ENSSSCG00000001905	196.071	401.807	348.509	615.815	854.437	867.274	5.01	6.96	7.35	14.34	14.41	16.08	6.44	14.9433	1.21437	0.00137584	0.010523
ENSSSCG00000001958	982.502	2675.06	2613.28	3974.75	7643.14	6617.15	25.1	46.32	55.13	92.58	128.94	122.7	42.1833	114.74	1.44362	5.91339e-05	0.00103351
ENSSSCG00000001968	266.885	553.441	569.322	811.284	1380.28	1007.08	6.82	9.58	12.01	18.9	23.28	18.67	9.47	20.2833	1.09886	0.00309235	0.019037
ENSSSCG00000001974	386.827	674.53	816.805	1049.23	1683.79	1416.02	9.88	11.68	17.23	24.44	28.4	26.26	12.93	26.3667	1.02799	0.0034759	0.0206247
ENSSSCG00000001989	6951.9	12889.8	6097.6	4040.13	3318.75	5431.36	177.57	223.21	128.64	94.11	55.99	100.72	176.473	83.6067	-1.07776	0.00300743	0.0186285
ENSSSCG00000001991	18617.8	24560.9	17840.2	5218.29	4507.01	6960.75	475.54	425.32	376.36	121.55	76.03	129.08	425.74	108.887	-1.96715	2.41686e-08	2.01848e-06
ENSSSCG00000002004	16444.8	15382.1	17922.8	6937.92	7800.87	10279.9	420.04	266.37	378.11	161.61	131.6	190.62	354.84	161.277	-1.13763	0.000909878	0.00795121
ENSSSCG00000002013	2233.43	3986.08	5173.02	1606.08	2281.62	2045.78	57.05	69.03	109.13	37.41	38.49	37.94	78.4033	37.9467	-1.04694	0.00164478	0.0119816
ENSSSCG00000002036	2490	2177.68	1707.4	790.408	909.78	769.623	63.6	37.71	36.02	18.41	15.35	14.27	45.7767	16.01	-1.51564	1.47373e-05	0.000354038
ENSSSCG00000002099	8.26214	57.8963	37.4255	71.3642	121.463	122.466	0.21	1	0.79	1.66	2.05	2.27	0.666667	1.99333	1.58015	0.00453629	0.0249226
ENSSSCG00000002243	148.535	1610.36	1465.8	2585.66	4471.62	4170.17	3.79	27.89	30.92	60.23	75.43	77.33	20.8667	70.9967	1.76655	0.0013199	0.0102368
ENSSSCG00000002257	43.2563	255.457	368.627	464.97	1068.62	689.654	1.1	4.42	7.78	10.83	18.03	12.79	4.43333	13.8833	1.64689	0.00383361	0.0220858
ENSSSCG00000002259	104.44	952.463	1159.13	3095.43	7431.92	6252.25	2.67	16.49	24.45	72.1	125.37	115.94	14.5367	104.47	2.84532	1.15069e-06	4.58946e-05
ENSSSCG00000002260	0	12.6746	15.8333	69.8055	253.186	239.553	0	0.22	0.33	1.63	4.27	4.44	0.183333	3.44667	4.23266	1.54092e-08	1.42316e-06
ENSSSCG00000002263	138.055	416.7	366.199	535.238	1047.84	548.092	3.53	7.22	7.73	12.47	17.68	10.16	6.16	13.4367	1.12517	0.00973085	0.0430468
ENSSSCG00000002266	1269.79	1914.62	1693.34	3263.39	4556.21	4879.1	32.43	33.16	35.72	76.02	76.86	90.48	33.77	81.12	1.26432	3.08371e-05	0.000637437
ENSSSCG00000002268	169.03	256.419	482.87	588.356	1057.7	847.582	4.32	4.44	10.19	13.7	17.84	15.72	6.31667	15.7533	1.31842	0.00253048	0.0164435
ENSSSCG00000002298	372.588	919.586	845.206	1423.97	2172.94	2058.8	9.52	15.92	17.83	33.17	36.66	38.18	14.4233	36.0033	1.31973	0.000180102	0.00235667
ENSSSCG00000002309	6.05704	33.0069	11.9431	56.4779	254.756	90.2697	0.15	0.57	0.25	1.32	4.3	1.67	0.323333	2.43	2.90986	6.66554e-06	0.000183509
ENSSSCG00000002341	556.998	647.855	559.934	2135.02	3942.73	2248.17	14.23	11.22	11.81	49.73	66.51	41.69	12.42	52.6433	2.08359	8.16202e-10	1.30216e-07
ENSSSCG00000002350	325.873	1567.04	1299.71	2502.81	3558.31	3298.73	8.32	27.14	27.42	58.3	60.03	61.17	20.96	59.8333	1.51331	0.00028465	0.0033607
ENSSSCG00000002368	538.311	824.249	455.599	1716.37	2827.32	1594.78	13.75	14.27	9.61	39.98	47.7	29.57	12.5433	39.0833	1.63963	3.13789e-06	0.000100899
ENSSSCG00000002386	2164.28	1555.15	2410.08	432.244	473.847	285.713	55.28	26.93	50.84	10.07	7.99	5.3	44.35	7.78667	-2.50986	4.09509e-10	7.60587e-08
ENSSSCG00000002387	110.462	289.928	205.223	586.169	1245.77	1354.4	2.82	5.02	4.33	13.65	21.02	25.12	4.05667	19.93	2.29658	6.90377e-08	4.79947e-06
ENSSSCG00000002408	28.2365	112.432	82.2636	144.189	226.752	226.395	0.72	1.95	1.74	3.36	3.83	4.2	1.47	3.79667	1.36892	0.00501551	0.0268328
ENSSSCG00000002429	102.048	229.571	309.391	453.458	704.178	581.2	2.61	3.98	6.53	10.56	11.88	10.78	4.37333	11.0733	1.34028	0.00255407	0.0165363
ENSSSCG00000002434	201.708	483.074	505.438	702.456	1188.17	873.835	5.15	8.37	10.66	16.36	20.04	16.2	8.06	17.5333	1.12125	0.00485419	0.0261496
ENSSSCG00000002449	2874.35	2048.52	2009.24	1186.66	1150.4	919.114	73.42	35.47	42.39	27.64	19.41	17.04	50.4267	21.3633	-1.23905	0.000749221	0.00685537
ENSSSCG00000002460	670.521	1544.62	1642.32	2111.76	4553.34	2774.57	17.13	26.75	34.65	49.19	76.81	51.45	26.1767	59.15	1.1761	0.00104646	0.00873192
ENSSSCG00000002476	86.9579	216.339	84.212	37.0043	61.4765	37.4004	2.22	3.75	1.78	0.86	1.04	0.69	2.58333	0.863333	-1.58124	0.0012511	0.00987232
ENSSSCG00000002495	920.958	1901.79	1168.06	2915.3	4843.08	3944.52	23.52	32.93	24.64	67.91	81.7	73.14	27.03	74.25	1.45783	3.67514e-06	0.000114908
ENSSSCG00000002502	238.085	987.746	833.336	1377.78	2216.07	2022.6	6.08	17.1	17.58	32.09	37.38	37.51	13.5867	35.66	1.39212	0.000661225	0.00627156
ENSSSCG00000002505	1329.88	3604.78	4560.91	5313.71	10305.2	9803.32	33.97	62.42	96.22	123.77	173.84	181.79	64.2033	159.8	1.31555	0.00101331	0.00853729
ENSSSCG00000002506	420.788	507.955	665.673	1518.53	2371.3	1707.8	10.75	8.8	14.04	35.37	40	31.67	11.1967	35.68	1.67205	1.32037e-06	5.14918e-05
ENSSSCG00000002507	10.3263	58.8879	64.1802	407.364	433.05	331.358	0.26	1.02	1.35	9.49	7.31	6.14	0.876667	7.64667	3.12473	6.02621e-08	4.30978e-06
ENSSSCG00000002525	997.978	1444.65	1151.49	2707.02	3278.7	2667.25	25.49	25.02	24.29	63.06	55.31	49.46	24.9333	55.9433	1.16589	0.000161151	0.00218104
ENSSSCG00000002623	63879.9	137935	170870	27365.8	15498.1	41632.7	1631.64	2388.64	3604.73	637.44	261.45	772.01	2541.67	556.967	-2.19011	1.44351e-06	5.4933e-05
ENSSSCG00000002639	315.924	736.032	685.396	184.363	289.619	217.267	8.07	12.75	14.46	4.29	4.89	4.03	11.76	4.40333	-1.41722	0.000630589	0.00605482
ENSSSCG00000002648	56.6043	199.404	227.517	594.98	1007.16	495.999	1.45	3.45	4.8	13.86	16.99	9.2	3.23333	13.35	2.04575	3.90154e-05	0.000763778
ENSSSCG00000002656	74.9181	1066.27	956.706	2314.79	2400.59	3043.89	1.91	18.46	20.18	53.92	40.5	56.44	13.5167	50.2867	1.89544	0.0014246	0.0107702
ENSSSCG00000002688	1528.57	2400.32	2478.05	6149.66	15212	9855.46	39.04	41.57	52.28	143.25	256.62	182.75	44.2967	194.207	2.13232	2.48377e-09	3.39649e-07
ENSSSCG00000002690	19.1336	121.843	137.298	272.528	325.092	603.167	0.49	2.11	2.9	6.35	5.48	11.18	1.83333	7.67	2.06476	0.000516653	0.0052398
ENSSSCG00000002709	140.262	243.803	171.386	361.33	519.692	404.549	3.58	4.22	3.62	8.42	8.77	7.5	3.80667	8.23	1.11236	0.00587487	0.0299006
ENSSSCG00000002714	238.801	512.299	628.077	690.87	1464.75	945.411	6.1	8.87	13.25	16.09	24.71	17.53	9.40667	19.4433	1.04752	0.0091347	0.0409925
ENSSSCG00000002715	373.097	881.496	974.357	1360.59	2753.79	1788.51	9.53	15.26	20.56	31.69	46.46	33.17	15.1167	37.1067	1.29554	0.000484583	0.00502932
ENSSSCG00000002739	783.323	1716.68	848.533	2853.02	2762.02	3376.91	20.01	29.73	17.9	66.46	46.59	62.62	22.5467	58.5567	1.37692	4.71029e-05	0.000878724
ENSSSCG00000002754	1529.92	2891.37	4075.19	1125.29	1186.54	917.649	39.08	50.07	85.97	26.21	20.02	17.02	58.3733	21.0833	-1.46921	7.12062e-05	0.00119098
ENSSSCG00000002755	221.265	202.519	187.158	604.838	1131.78	1768.49	5.65	3.51	3.95	14.09	19.09	32.79	4.37	21.99	2.33114	1.12826e-07	6.91629e-06
ENSSSCG00000002795	495.574	1801.14	1511.53	2634.17	4235.21	2835.65	12.66	31.19	31.89	61.36	71.45	52.58	25.2467	61.7967	1.29144	0.00071018	0.00662442
ENSSSCG00000002799	3103.1	7089.37	6312.76	8757.22	18736.5	15711.8	79.26	122.77	133.18	203.98	316.08	291.35	111.737	270.47	1.27537	0.000322283	0.00374463
ENSSSCG00000002804	949.113	2940.11	2425.46	3457.38	5897.04	4643.07	24.24	50.91	51.17	80.53	99.48	86.1	42.1067	88.7033	1.07494	0.00219636	0.014846
ENSSSCG00000002847	938.202	3604.81	1283.52	4808.52	7651.93	3510.42	23.96	62.43	27.08	112.01	129.08	65.1	37.8233	102.063	1.43212	0.000587255	0.00577692
ENSSSCG00000002849	219.395	531.535	1009.08	2570.84	5908.15	3915.8	5.6	9.2	21.29	59.88	99.67	72.61	12.03	77.3867	2.68545	7.12773e-09	7.84933e-07
ENSSSCG00000002857	17.4352	94.1334	39.8087	218.791	402.946	328.245	0.45	1.63	0.84	5.1	6.8	6.09	0.973333	5.99667	2.62315	9.70947e-07	4.08191e-05
ENSSSCG00000002869	2113.12	5573.26	5249.72	6639.63	12128.8	9677.76	53.97	96.51	110.75	154.66	204.61	179.46	87.0767	179.577	1.04424	0.00356035	0.0209918
ENSSSCG00000002893	1635.63	852.415	1375.25	3619.93	8555.65	4821.39	41.78	14.76	29.01	84.32	144.33	89.41	28.5167	106.02	1.89446	2.90766e-06	9.5976e-05
ENSSSCG00000002907	17216.8	15441.9	14087.8	7714.21	8750.22	8043.22	439.76	267.41	297.2	179.69	147.61	149.15	334.79	158.817	-1.07589	0.00158309	0.011643
ENSSSCG00000002908	110.118	73.0359	96.3691	339.271	444.54	373.013	2.81	1.26	2.03	7.9	7.5	6.92	2.03333	7.44	1.87146	4.76405e-05	0.000884834
ENSSSCG00000002953	8798.89	5908.82	2754.24	2230.79	2196.22	1505.97	224.74	102.32	58.1	51.96	37.05	27.93	128.387	38.98	-1.71969	0.000170588	0.00227037
ENSSSCG00000002962	2663.15	1447.76	1573.27	4090.05	8612.94	4779.3	68.02	25.07	33.19	95.27	145.3	88.62	42.0933	109.73	1.38229	0.0005681	0.00563247
ENSSSCG00000002989	1359.22	2670.98	2400.49	3941.73	7107.37	4725.55	34.72	46.25	50.64	91.82	119.9	87.63	43.87	99.7833	1.18556	0.00021984	0.00273296
ENSSSCG00000003006	7806.18	8816.31	2849.83	1345.01	136.868	3458.2	199.39	152.67	60.12	31.33	2.31	64.13	137.393	32.59	-2.07581	0.00619308	0.0309168
ENSSSCG00000003047	378.463	371.783	132.796	95.5889	75.7348	92.1794	9.67	6.44	2.8	2.23	1.28	1.71	6.30333	1.74	-1.85703	0.000435738	0.00465835
ENSSSCG00000003061	404.285	468.748	414.822	907.945	1668.7	815.61	10.33	8.12	8.75	21.15	28.15	15.12	9.06667	21.4733	1.2439	0.000924702	0.00803409
ENSSSCG00000003069	1529.06	1718.67	2038.86	821.223	930.914	991.147	39.06	29.76	43.01	19.13	15.7	18.38	37.2767	17.7367	-1.07154	0.00107037	0.00889167
ENSSSCG00000003072	124.83	254.599	277.194	557.186	937.496	962.911	3.19	4.41	5.85	12.98	15.82	17.86	4.48333	15.5533	1.79458	1.05764e-05	0.000273056
ENSSSCG00000003076	25.7464	28.5022	38.4205	80.4075	103.587	97.4782	0.66	0.49	0.81	1.87	1.75	1.81	0.653333	1.81	1.4701	0.00178237	0.0127105
ENSSSCG00000003128	1161.21	1955.94	2333.37	2956.53	6217.29	3600.28	29.66	33.87	49.23	68.87	104.88	66.76	37.5867	80.17	1.09284	0.00128749	0.0100575
ENSSSCG00000003148	3802.48	3141.24	1140.67	1399.72	677.429	858.646	97.12	54.4	24.06	32.6	11.43	15.92	58.5267	19.9833	-1.5503	0.00178699	0.0127251
ENSSSCG00000003153	247497	283157	205408	108104	141981	137981	6321.65	4903.47	4333.36	2518.1	2395.15	2558.64	5186.16	2490.63	-1.05816	0.00160375	0.0117394
ENSSSCG00000003214	8.97698	14.0662	31.1098	163.981	350.904	219.33	0.23	0.24	0.66	3.82	5.92	4.07	0.376667	4.60333	3.61132	1.52939e-10	3.22571e-08
ENSSSCG00000003217	1888.3	1583.79	1121.46	791.965	922.33	778.03	48.23	27.43	23.66	18.45	15.56	14.43	33.1067	16.1467	-1.03589	0.00451494	0.0248272
ENSSSCG00000003229	10479	8668.98	7645.04	3827.36	4806.09	4759.83	267.66	150.12	161.28	89.15	81.08	88.26	193.02	86.1633	-1.1636	0.000761455	0.00692657
ENSSSCG00000003241	29.1797	83.1158	64.67	125.908	214.858	136.403	0.75	1.44	1.36	2.93	3.62	2.53	1.18333	3.02667	1.35487	0.00391806	0.022464
ENSSSCG00000003261	3810.91	3447.05	2601.06	1401.35	1553.91	1144.94	97.34	59.69	54.87	32.64	26.21	21.23	70.6333	26.6933	-1.40387	5.43608e-05	0.00096918
ENSSSCG00000003289	3510.83	2969.3	2657.1	1531.21	1951.89	1498.63	89.67	51.42	56.06	35.67	32.93	27.79	65.7167	32.13	-1.03234	0.00198141	0.0137746
ENSSSCG00000003301	1477.41	4376.38	4327.41	6830.04	11360.2	7645.1	37.74	75.79	91.29	159.09	191.64	141.77	68.2733	164.167	1.26577	0.000824922	0.00735866
ENSSSCG00000003302	2961.67	6197.62	2068.03	2395.73	1368.05	1160.86	75.65	107.33	43.63	55.8	23.08	21.53	75.5367	33.47	-1.17431	0.00682839	0.0331794
ENSSSCG00000003362	281.06	1024.34	921.545	1537.06	1855.84	1883.48	7.18	17.74	19.44	35.8	31.31	34.93	14.7867	34.0133	1.2018	0.00231192	0.0154592
ENSSSCG00000003382	38.0281	42.0722	37.3866	129.624	268.966	177.13	0.97	0.73	0.79	3.02	4.54	3.28	0.83	3.61333	2.12215	5.07899e-06	0.000149063
ENSSSCG00000003386	297.796	176.451	211.625	422.455	849.745	594.415	7.61	3.06	4.46	9.84	14.33	11.02	5.04333	11.73	1.21775	0.00632733	0.0313444
ENSSSCG00000003393	209.373	314.706	352.894	538.618	919.173	597.226	5.35	5.45	7.44	12.55	15.51	11.07	6.08	13.0433	1.10117	0.00478674	0.0258983
ENSSSCG00000003395	355.123	1113.9	832.908	4674.22	7531.29	4435.75	9.07	19.29	17.57	108.88	127.05	82.25	15.31	106.06	2.79233	1.24685e-13	7.05265e-11
ENSSSCG00000003410	441.786	191.178	95.7299	678.787	936.002	660.823	11.28	3.31	2.02	15.81	15.79	12.25	5.53667	14.6167	1.40052	0.011097	0.0474375
ENSSSCG00000003413	603.183	2193.02	2250.88	2665.87	4322.32	3782.46	15.41	37.98	47.49	62.1	72.92	70.14	33.6267	68.3867	1.02411	0.00848961	0.0388063
ENSSSCG00000003438	771.845	2117.14	1170.1	3128.83	4687.52	5043.16	19.71	36.66	24.68	72.88	79.08	93.52	27.0167	81.8267	1.59872	2.25577e-06	7.90887e-05
ENSSSCG00000003463	4454.66	6751.89	3732.33	2164.53	1637.47	2173.98	113.78	116.92	78.74	50.42	27.62	40.31	103.147	39.45	-1.3866	5.32225e-05	0.000960196
ENSSSCG00000003470	3914.22	4658.73	2053.37	1157.89	1055.24	1499.41	99.98	80.68	43.32	26.97	17.8	27.8	74.66	24.19	-1.62592	1.31069e-05	0.000324259
ENSSSCG00000003488	2798.85	5229.83	4346.36	7461.76	12303.1	11220	71.49	90.57	91.69	173.81	207.55	208.06	84.5833	196.473	1.21589	0.000171513	0.00228024
ENSSSCG00000003512	1065.81	3559.64	3561.66	4191.2	7331.42	6139.75	27.22	61.64	75.14	97.63	123.68	113.85	54.6667	111.72	1.03115	0.00658187	0.0323108
ENSSSCG00000003539	16.7766	63.9759	58.2219	133.28	160.676	109.748	0.43	1.11	1.23	3.1	2.71	2.04	0.923333	2.61667	1.50281	0.00304422	0.0187908
ENSSSCG00000003547	23.0731	66.1389	50.6077	153.918	285.425	232.097	0.59	1.15	1.07	3.59	4.81	4.3	0.936667	4.23333	2.17619	4.91358e-06	0.000145582
ENSSSCG00000003552	1.73217	19.614	36.504	48.7061	166.379	104.84	0.04	0.34	0.77	1.13	2.81	1.94	0.383333	1.96	2.35418	0.000681215	0.00641229
ENSSSCG00000003559	227.417	2245.6	2719.05	4921.28	7943.52	6304.92	5.81	38.89	57.36	114.63	134	116.91	34.02	121.847	1.84061	0.00110694	0.00909828
ENSSSCG00000003565	2616.46	3744.72	1452.54	748.003	235.918	1078.72	66.83	64.85	30.64	17.42	3.98	20	54.1067	13.8	-1.97114	0.000130543	0.00186293
ENSSSCG00000003578	949.027	1466.7	1050.86	2353.95	4381.61	3523.84	24.24	25.4	22.17	54.83	73.92	65.34	23.9367	64.6967	1.43447	4.45297e-06	0.000134171
ENSSSCG00000003586	1329.31	4295.42	3647.92	6840.82	13259.3	8636.79	33.95	74.38	76.96	159.35	223.68	160.16	61.7633	181.063	1.55167	5.24369e-05	0.000951202
ENSSSCG00000003608	3150.78	2326.53	2034.78	5185.72	10421.1	6205.37	80.48	40.29	42.93	120.79	175.8	115.07	54.5667	137.22	1.3304	0.00034235	0.00391923
ENSSSCG00000003621	18.6932	77.8645	90.9139	278.341	451.57	569.91	0.48	1.35	1.92	6.48	7.62	10.57	1.25	8.22333	2.7178	5.84619e-07	2.69444e-05
ENSSSCG00000003627	345.713	945.489	782.793	1130.39	2167.49	1844.58	8.83	16.37	16.51	26.33	36.56	34.2	13.9033	32.3633	1.21893	0.000795982	0.00716729
ENSSSCG00000003628	221.702	725.137	951.89	1195.25	2726.58	1869.5	5.66	12.56	20.08	27.84	46	34.67	12.7667	36.17	1.50241	0.000615104	0.00596598
ENSSSCG00000003654	882.998	3463.26	3430.98	7939.07	11817.1	10636.6	22.55	59.97	72.38	184.93	199.35	197.24	51.6333	193.84	1.90849	4.69533e-06	0.000140117
ENSSSCG00000003670	218.067	816.16	842.336	1222.59	1981.56	2052.78	5.57	14.13	17.77	28.48	33.43	38.07	12.49	33.3267	1.4159	0.000714561	0.00665071
ENSSSCG00000003682	893.739	2199.97	2150.88	3083.38	5118.5	5305.85	22.83	38.1	45.38	71.82	86.35	98.39	35.4367	85.52	1.27102	0.000204218	0.00259415
ENSSSCG00000003697	270.735	545.03	727.875	1092.58	1907.73	1469.35	6.92	9.44	15.36	25.45	32.18	27.25	10.5733	28.2933	1.42003	0.000176017	0.00231604
ENSSSCG00000003708	121.31	385.46	322.09	585.745	1187.47	680.942	3.1	6.68	6.79	13.64	20.03	12.63	5.52333	15.4333	1.48244	0.000645659	0.00615677
ENSSSCG00000003716	1071.21	2049.05	1982.05	3211.27	5351.98	4321.97	27.36	35.48	41.81	74.8	90.29	80.14	34.8833	81.7433	1.22856	9.83061e-05	0.00151589
ENSSSCG00000003718	72.5886	187.306	235.743	406.279	870.701	602.496	1.85	3.24	4.97	9.46	14.69	11.17	3.35333	11.7733	1.81186	0.000116337	0.00171126
ENSSSCG00000003728	568.55	1890.61	1715.84	2130.96	3752.45	3691.72	14.52	32.74	36.2	49.64	63.3	68.46	27.82	60.4667	1.12002	0.0027812	0.017644
ENSSSCG00000003729	199.011	530.689	379.136	1027.44	1776.53	1341.88	5.08	9.19	8	23.93	29.97	24.88	7.42333	26.26	1.82273	1.09107e-06	4.4082e-05
ENSSSCG00000003738	855.849	2256.38	2730.32	3796.06	9387.6	6031.31	21.86	39.07	57.6	88.42	158.36	111.84	39.51	119.54	1.5972	5.4266e-05	0.00096918
ENSSSCG00000003748	8.92114	104.012	32.8906	112.102	224.454	164.274	0.23	1.8	0.69	2.61	3.79	3.05	0.906667	3.15	1.79671	0.00359967	0.0211593
ENSSSCG00000003749	662.876	1262.53	1006.99	1537.71	2705.09	2231.98	16.93	21.86	21.24	35.82	45.63	41.39	20.01	40.9467	1.03302	0.00123493	0.00980697
ENSSSCG00000003771	1081.39	2746.94	2542.19	3953.7	6358.8	5184.13	27.62	47.57	53.63	92.09	107.27	96.13	42.94	98.4967	1.19775	0.000390456	0.00431896
ENSSSCG00000003783	4.84979	84.3388	113.317	252.56	374.466	410.692	0.12	1.46	2.39	5.88	6.32	7.62	1.32333	6.60667	2.31975	0.000972319	0.00828168
ENSSSCG00000003797	336.136	605.665	693.03	181.122	296.485	298.813	8.59	10.49	14.62	4.22	5	5.54	11.2333	4.92	-1.19106	0.00371383	0.0216768
ENSSSCG00000003805	464.201	679.49	696.663	1530.66	4046.38	2425.94	11.86	11.77	14.7	35.65	68.26	44.99	12.7767	49.6333	1.9578	3.86003e-08	2.99066e-06
ENSSSCG00000003820	1108.37	2403.2	3258.93	5007.27	10711.7	7043.86	28.31	41.62	68.75	116.64	180.7	130.62	46.2267	142.653	1.62572	2.489e-05	0.000529456
ENSSSCG00000003848	13.088	73.8224	68.6293	289.134	542.481	565.082	0.33	1.28	1.45	6.73	9.15	10.48	1.02	8.78667	3.10675	2.94369e-08	2.40995e-06
ENSSSCG00000003859	220.414	689.981	583.565	1158.41	2642.84	1638.39	5.63	11.95	12.31	26.98	44.58	30.38	9.96333	33.98	1.76999	8.17207e-06	0.00021964
ENSSSCG00000003861	336.815	782.6	1052.16	1697.22	4538.65	2624.18	8.6	13.55	22.2	39.53	76.56	48.66	14.7833	54.9167	1.89327	3.54956e-06	0.000112109
ENSSSCG00000003872	1586.38	3456.94	2972.14	4928.01	12187.3	8917.93	40.52	59.86	62.7	114.79	205.59	165.37	54.36	161.917	1.57463	1.17045e-05	0.000297854
ENSSSCG00000003888	262.019	736.691	889.339	1001.24	2155.27	1740.48	6.69	12.76	18.76	23.32	36.36	32.27	12.7367	30.65	1.2669	0.0018439	0.0130224
ENSSSCG00000003901	6344.54	11323.6	4533.66	3239.66	2576.89	3393.89	162.05	196.09	95.64	75.46	43.47	62.93	151.26	60.62	-1.31916	0.000433375	0.00464191
ENSSSCG00000003931	522.808	895.904	1187.78	1525.2	3482.06	2228.42	13.35	15.51	25.06	35.53	58.74	41.32	17.9733	45.1967	1.33036	0.000255424	0.00307509
ENSSSCG00000003941	442.639	1529.69	1192.22	2252.33	2698.58	2359.9	11.31	26.49	25.15	52.46	45.52	43.76	20.9833	47.2467	1.17097	0.00146843	0.0109969
ENSSSCG00000003971	2337.34	4033.29	2996.72	1394.65	1730.48	1843.6	59.7	69.85	63.22	32.49	29.19	34.19	64.2567	31.9567	-1.00773	0.000954828	0.00817186
ENSSSCG00000003990	118.539	213.748	164.161	347.338	348.295	428.031	3.03	3.7	3.46	8.09	5.88	7.94	3.39667	7.30333	1.10444	0.00815769	0.0375701
ENSSSCG00000004029	1158.31	1948.41	2452.83	3158.38	5807.24	4743.55	29.59	33.74	51.75	73.57	97.97	87.96	38.36	86.5	1.1731	0.000386014	0.00429474
ENSSSCG00000004044	1118.23	4749.39	4175.39	6158.68	7630.17	7644.23	28.56	82.25	88.09	143.46	128.72	141.75	66.3	137.977	1.05734	0.00955399	0.0424001
ENSSSCG00000004055	60.4478	96.8117	63.4707	129.023	276.126	208.1	1.54	1.68	1.34	3.01	4.66	3.86	1.52	3.84333	1.33829	0.00266656	0.0170512
ENSSSCG00000004063	206.043	598.986	429.859	1205.99	1795.92	1308.65	5.26	10.37	9.07	28.09	30.3	24.27	8.23333	27.5533	1.74268	3.63896e-06	0.000114352
ENSSSCG00000004064	523.725	1293.49	1380.8	2030.8	3314.66	2790.95	13.38	22.4	29.13	47.3	55.92	51.75	21.6367	51.6567	1.25548	0.000347788	0.00397099
ENSSSCG00000004070	623.071	1769.6	1664.73	2394.88	4514.93	3366.8	15.91	30.64	35.12	55.78	76.16	62.43	27.2233	64.79	1.25093	0.000500873	0.00513451
ENSSSCG00000004074	7.9666	37.6516	54.6685	93.4432	183.621	191.126	0.2	0.65	1.15	2.18	3.1	3.54	0.666667	2.94	2.14078	0.0002216	0.00274661
ENSSSCG00000004077	142.123	399.957	507.755	603.602	1071.78	877.281	3.63	6.93	10.71	14.06	18.08	16.27	7.09	16.1367	1.18649	0.00679585	0.0330534
ENSSSCG00000004104	395.099	1076.75	1144.06	1347.75	2587.15	1879.98	10.09	18.65	24.14	31.39	43.64	34.86	17.6267	36.63	1.05527	0.00487955	0.0262303
ENSSSCG00000004106	340.349	1220.19	1325.38	1541.24	2533.72	2490.97	8.69	21.13	27.96	35.9	42.74	46.19	19.26	41.61	1.11132	0.00615117	0.0308233
ENSSSCG00000004109	663.461	968.823	685.555	2465.43	4058.82	2824.41	16.95	16.78	14.46	57.43	68.47	52.37	16.0633	59.4233	1.88726	3.28413e-09	4.17017e-07
ENSSSCG00000004113	244.891	696.399	619.968	878.176	1741.82	1399.31	6.26	12.06	13.08	20.46	29.38	25.95	10.4667	25.2633	1.27124	0.00096209	0.0082227
ENSSSCG00000004120	147.051	477.378	483.843	832.652	1324.64	1415.48	3.76	8.27	10.21	19.4	22.35	26.25	7.41333	22.6667	1.61238	0.000129775	0.00186051
ENSSSCG00000004125	169.94	292.457	394.961	552.266	1153.72	1012.87	4.34	5.06	8.33	12.86	19.46	18.78	5.91	17.0333	1.52713	0.000219715	0.00273296
ENSSSCG00000004132	129.139	337.762	388.35	479.065	985.957	947.491	3.3	5.85	8.19	11.16	16.63	17.57	5.78	15.12	1.38732	0.00148792	0.0110872
ENSSSCG00000004138	79.255	599.212	644.445	1470.99	2491.39	2483.58	2.02	10.38	13.6	34.26	42.03	46.05	8.66667	40.78	2.23431	2.50529e-05	0.00053201
ENSSSCG00000004139	625.276	1840.41	834.592	1604.39	3160.39	3500.67	15.97	31.87	17.61	37.37	53.31	64.91	21.8167	51.8633	1.24928	0.000726885	0.00672018
ENSSSCG00000004145	1002.41	2109.81	1869.16	3423.64	3897.36	3150.99	25.6	36.54	39.43	79.75	65.75	58.43	33.8567	67.9767	1.0056	0.00178748	0.0127251
ENSSSCG00000004154	566.099	1403.69	996.634	2351.25	4304.98	3484.36	14.46	24.31	21.03	54.77	72.62	64.61	19.9333	64	1.68289	5.38296e-07	2.53733e-05
ENSSSCG00000004163	2526.13	5283.08	5399.37	8092.47	12070.4	12060	64.52	91.49	113.91	188.5	203.62	223.63	89.9733	205.25	1.18981	0.000475728	0.00496225
ENSSSCG00000004164	101.514	228.998	279.779	408.111	907.228	656.368	2.59	3.97	5.9	9.51	15.3	12.17	4.15333	12.3267	1.56944	0.000420013	0.00454886
ENSSSCG00000004166	468.988	358.858	599.567	1081.35	2068.78	1268.61	11.98	6.21	12.65	25.19	34.9	23.52	10.28	27.87	1.43887	0.000183817	0.0023902
ENSSSCG00000004181	970.763	2045.82	221.9	2212.67	6794.69	5917.72	24.8	35.43	4.68	51.54	114.62	109.73	21.6367	91.9633	2.08758	0.00020151	0.00257189
ENSSSCG00000004190	37.4577	875.792	1078.09	2175.74	4610.22	3470.28	0.96	15.17	22.74	50.68	77.77	64.35	12.9567	64.2667	2.31038	0.000982505	0.008357
ENSSSCG00000004246	2.98311	48.6156	62.5928	139.05	334.688	242.425	0.08	0.84	1.32	3.24	5.65	4.5	0.746667	4.46333	2.57959	0.000187781	0.00243411
ENSSSCG00000004247	442.412	859.367	825.729	1123.4	2326.41	1587.27	11.3	14.88	17.42	26.17	39.25	29.43	14.5333	31.6167	1.12132	0.00124058	0.00983995
ENSSSCG00000004249	156.34	257.51	232.653	745.729	1192.54	1218.82	3.99	4.46	4.91	17.37	20.12	22.6	4.45333	20.03	2.1692	1.30489e-08	1.24506e-06
ENSSSCG00000004253	570.715	1249.94	1267.76	1807.81	2681.82	2480.35	14.58	21.65	26.75	42.11	45.24	45.99	20.9933	44.4467	1.08214	0.00123104	0.0097837
ENSSSCG00000004262	145.949	324.305	317.43	461.469	729.634	596.619	3.73	5.62	6.7	10.75	12.31	11.06	5.35	11.3733	1.08804	0.00734036	0.0349305
ENSSSCG00000004263	182.709	476.634	418.457	627.786	1012.65	970.823	4.67	8.25	8.83	14.62	17.08	18	7.25	16.5667	1.19223	0.002639	0.0169539
ENSSSCG00000004279	584.369	1550.57	1484.85	2142.89	3769.53	3097.08	14.93	26.85	31.33	49.91	63.59	57.43	24.37	56.9767	1.22526	0.000479367	0.00499183
ENSSSCG00000004281	124.327	221.74	163.106	469.293	1080.74	601.414	3.18	3.84	3.44	10.93	18.23	11.15	3.48667	13.4367	1.94625	3.35512e-06	0.000106508
ENSSSCG00000004294	1511.24	3804.96	4559.7	7802.1	15818	12694.5	38.6	65.89	96.19	181.74	266.84	235.4	66.8933	227.993	1.76906	5.04982e-06	0.000148558
ENSSSCG00000004328	482.495	1094.08	1001.23	2286.04	4159.09	3252.85	12.32	18.95	21.12	53.25	70.16	60.32	17.4633	61.2433	1.81022	9.32252e-08	5.97987e-06
ENSSSCG00000004331	119.573	507.648	637.002	1003.2	1886.46	1706.94	3.05	8.79	13.44	23.37	31.82	31.65	8.42667	28.9467	1.78036	0.000157139	0.00214276
ENSSSCG00000004332	26.3888	78.2423	123.494	1126.7	3649.99	2250.28	0.67	1.35	2.61	26.24	61.57	41.73	1.54333	43.18	4.80624	4.99082e-19	1.24211e-15
ENSSSCG00000004334	746.656	1798.84	2080.21	2468.88	4816.35	4009.26	19.07	31.15	43.88	57.51	81.25	74.35	31.3667	71.0367	1.17933	0.00100579	0.0085063
ENSSSCG00000004344	111.687	413.676	488.902	686.258	1310.65	1269.41	2.85	7.16	10.31	15.99	22.11	23.54	6.77333	20.5467	1.60097	0.000570683	0.00564514
ENSSSCG00000004369	382.819	814.847	598.578	1004.88	1504.92	1377.89	9.78	14.11	12.63	23.41	25.39	25.55	12.1733	24.7833	1.02565	0.00267387	0.0170722
ENSSSCG00000004403	47.1616	380.861	389.892	538.571	1115.83	935.326	1.2	6.6	8.23	12.55	18.82	17.34	5.34333	16.2367	1.60344	0.00419599	0.0235733
ENSSSCG00000004421	1031.47	1743.58	1544.21	3408.27	5489.86	3295.37	26.35	30.19	32.58	79.39	92.61	61.11	29.7067	77.7033	1.38719	1.28434e-05	0.00032093
ENSSSCG00000004432	771.413	3124.03	3342.46	4737.44	7739.69	5630.1	19.7	54.1	70.51	110.35	130.56	104.4	48.1033	115.103	1.25872	0.00247632	0.0162567
ENSSSCG00000004457	397.948	1154.76	1118.34	1396	2253.2	2081.41	10.16	20	23.59	32.52	38.01	38.6	17.9167	36.3767	1.02171	0.00550627	0.0286215
ENSSSCG00000004466	205.377	643.93	926.478	883.379	2199.03	1569.46	5.25	11.15	19.55	20.58	37.1	29.1	11.9833	28.9267	1.27137	0.00508268	0.0270873
ENSSSCG00000004473	19.2745	134.345	290.806	1014.91	2177.97	2542.4	0.49	2.33	6.13	23.64	36.74	47.14	2.98333	35.84	3.58657	7.13574e-08	4.93317e-06
ENSSSCG00000004480	11773.8	8544.66	5681.79	4239.45	3369.52	3454.74	300.73	147.97	119.87	98.75	56.84	64.06	189.523	73.2167	-1.37213	0.000776104	0.00703412
ENSSSCG00000004490	3.00032	51.41	102.104	168.87	403.154	415.822	0.08	0.89	2.15	3.93	6.8	7.71	1.04	6.14667	2.56322	0.000742327	0.00681735
ENSSSCG00000004493	15.6856	7.76633	41.5162	125.301	369.01	196.884	0.4	0.13	0.88	2.92	6.23	3.65	0.47	4.26667	3.18238	6.08737e-07	2.79525e-05
ENSSSCG00000004509	89.4365	191.263	232.327	387.346	506.733	786.347	2.28	3.31	4.9	9.02	8.55	14.58	3.49667	10.7167	1.6158	0.000438247	0.00466514
ENSSSCG00000004520	55.5906	122.853	195.921	273.665	1186.82	606.661	1.42	2.13	4.13	6.37	20.02	11.25	2.56	12.5467	2.29309	2.87743e-05	0.000599927
ENSSSCG00000004528	1884.64	3521.29	2953.53	4127.02	8966.05	5890.97	48.14	60.98	62.31	96.13	151.25	109.24	57.1433	118.873	1.05677	0.00127421	0.0100103
ENSSSCG00000004531	167.501	268.411	270.521	503.465	602.29	592.45	4.28	4.65	5.71	11.73	10.16	10.99	4.88	10.96	1.16729	0.00310739	0.0190674
ENSSSCG00000004535	121.407	178.707	303.668	767.299	1489.44	1614.19	3.1	3.09	6.41	17.87	25.13	29.93	4.2	24.31	2.53309	6.02746e-09	6.81871e-07
ENSSSCG00000004538	410.043	903.077	811.798	1108.63	2129.79	1608.95	10.47	15.64	17.13	25.82	35.93	29.84	14.4133	30.53	1.08282	0.00183189	0.0129744
ENSSSCG00000004547	596.416	1628.69	1707.47	2212.45	3981.34	2485.75	15.23	28.2	36.02	51.54	67.16	46.09	26.4833	54.93	1.05251	0.00416759	0.0234774
ENSSSCG00000004548	217.234	352.138	479.608	634.089	1235.52	875.2	5.55	6.1	10.12	14.77	20.84	16.23	7.25667	17.28	1.25172	0.0017697	0.0126409
ENSSSCG00000004549	272.622	390.587	307.292	125.984	127.472	135.951	6.96	6.76	6.48	2.93	2.15	2.52	6.73333	2.53333	-1.41028	0.000792363	0.00713987
ENSSSCG00000004551	592.451	1718.23	1401.11	2313.51	3827.51	2820.43	15.13	29.75	29.56	53.89	64.57	52.3	24.8133	56.92	1.19782	0.000598342	0.0058536
ENSSSCG00000004554	921.309	2122.56	3630.89	7000.3	13618.5	10256.5	23.53	36.76	76.6	163.06	229.74	190.19	45.63	194.33	2.09045	1.28529e-06	5.06146e-05
ENSSSCG00000004558	359.749	781.313	689.222	1196.93	1909.27	1827.8	9.19	13.53	14.54	27.88	32.21	33.89	12.42	31.3267	1.33473	0.000100906	0.00153881
ENSSSCG00000004561	487.145	1919.17	1437.33	3181.18	5225.85	4584.48	12.44	33.23	30.32	74.1	88.16	85.01	25.33	82.4233	1.70221	7.88003e-06	0.000212249
ENSSSCG00000004576	41.334	72.4503	91.5752	232.567	283.759	454.085	1.06	1.25	1.93	5.42	4.79	8.42	1.41333	6.21	2.13549	8.58465e-06	0.000228264
ENSSSCG00000004582	416.962	737.043	770.249	965.081	2171.76	1346.82	10.65	12.76	16.25	22.48	36.64	24.97	13.22	28.03	1.08425	0.00237529	0.0157643
ENSSSCG00000004589	326.351	863.893	837.473	1121.25	1892.88	1505.98	8.34	14.96	17.67	26.12	31.93	27.93	13.6567	28.66	1.06943	0.00356105	0.0209918
ENSSSCG00000004603	351.35	884.977	877.458	1537.46	2478.63	2509.85	8.97	15.33	18.51	35.81	41.81	46.54	14.27	41.3867	1.53618	1.96205e-05	0.000437318
ENSSSCG00000004612	680.314	1884.3	2017.08	2715.65	3886.04	3705.46	17.38	32.63	42.55	63.26	65.56	68.71	30.8533	65.8433	1.09361	0.00235367	0.015671
ENSSSCG00000004617	333.425	1160.91	1030.99	1614.79	3132.68	2142.42	8.52	20.1	21.75	37.61	52.85	39.73	16.79	43.3967	1.36998	0.000430798	0.00462541
ENSSSCG00000004622	164.455	403.068	474.532	477.921	1767.97	758.438	4.2	6.98	10.01	11.13	29.82	14.06	7.06333	18.3367	1.37631	0.00380562	0.0219932
ENSSSCG00000004624	1880.54	6245.51	4032.86	6727.3	9604.65	10018.1	48.03	108.15	85.08	156.7	162.03	185.77	80.42	168.167	1.06427	0.00340578	0.0203366
ENSSSCG00000004626	951.981	2583.8	2800.81	3478.91	6105.92	5774.74	24.32	44.74	59.09	81.04	103	107.08	42.7167	97.04	1.18378	0.00110042	0.00906265
ENSSSCG00000004636	1032.08	2223.01	1972.25	3106.47	4653.6	4607.16	26.36	38.5	41.61	72.36	78.5	85.43	35.49	78.7633	1.15011	0.00029871	0.00351006
ENSSSCG00000004639	705.334	2042.45	2072.74	2387.12	3679.04	4339.08	18.02	35.37	43.73	55.6	62.06	80.46	32.3733	66.04	1.02853	0.00514332	0.0272936
ENSSSCG00000004643	1558.09	6003.35	6919.56	1871.71	2791.57	2238.24	39.8	103.96	145.98	43.6	47.09	41.5	96.58	44.0633	-1.13215	0.00602487	0.0304549
ENSSSCG00000004657	84.5302	271.277	321.752	407.655	891.233	976.747	2.16	4.7	6.79	9.5	15.03	18.11	4.55	14.2133	1.64331	0.000624525	0.00601982
ENSSSCG00000004661	58.8657	172.637	124.768	496.386	815.02	814.813	1.5	2.99	2.63	11.56	13.75	15.11	2.37333	13.4733	2.50512	1.54392e-08	1.42316e-06
ENSSSCG00000004670	20153.4	27735.4	20601.4	12151.6	11328.5	10866.6	514.76	480.3	434.61	283.05	191.11	201.5	476.557	225.22	-1.08131	0.00121794	0.00972785
ENSSSCG00000004671	46.3682	203.979	236.867	345.509	535.796	424.591	1.18	3.53	5	8.05	9.04	7.87	3.23667	8.32	1.36207	0.00798375	0.0370156
ENSSSCG00000004684	313.625	1124.23	1031.62	2138.11	3490.9	3124.51	8.01	19.47	21.76	49.8	58.89	57.94	16.4133	55.5433	1.75875	5.59251e-06	0.000161095
ENSSSCG00000004695	299.427	590.184	886.801	1422.26	3457.35	2445.83	7.65	10.22	18.71	33.13	58.32	45.35	12.1933	45.6	1.90294	2.15631e-06	7.60147e-05
ENSSSCG00000004699	822.575	252.042	395.791	2364.13	5780.25	3600.59	21.01	4.36	8.35	55.07	97.51	66.77	11.24	73.1167	2.70156	9.1163e-08	5.9085e-06
ENSSSCG00000004703	24591.5	50332.7	31258	16496.5	17026.6	21133.2	628.12	871.62	659.43	384.26	287.23	391.88	719.723	354.457	-1.02183	0.00257139	0.0166152
ENSSSCG00000004709	57.0911	255.666	370.331	518.934	822.148	789.612	1.46	4.43	7.81	12.09	13.87	14.64	4.56667	13.5333	1.5673	0.00276419	0.0175587
ENSSSCG00000004717	652.292	1593.44	1504.76	1949.97	3488.41	3666.5	16.66	27.59	31.74	45.42	58.85	67.99	25.33	57.42	1.18071	0.000716794	0.00666153
ENSSSCG00000004718	4.90473	32.9552	37.5704	169.322	340.723	386.985	0.13	0.57	0.79	3.94	5.75	7.18	0.496667	5.62333	3.50108	8.352e-09	8.95968e-07
ENSSSCG00000004725	213.628	1024.01	1120.02	1431.16	2687.07	2472.76	5.46	17.73	23.63	33.34	45.33	45.85	15.6067	41.5067	1.41118	0.00191284	0.0133652
ENSSSCG00000004739	96.7791	450.994	601.048	1390.42	2827.05	2978.04	2.47	7.81	12.68	32.39	47.69	55.22	7.65333	45.1	2.55897	3.57451e-07	1.80818e-05
ENSSSCG00000004779	412.117	630.11	667.146	1767.75	2234.23	1469.23	10.53	10.91	14.07	41.18	37.69	27.24	11.8367	35.37	1.57926	4.81297e-06	0.000143284
ENSSSCG00000004782	190.794	929.271	1302.14	2088.92	4712.29	3461.44	4.87	16.09	27.47	48.66	79.49	64.19	16.1433	64.1133	1.98969	6.25571e-05	0.00107493
ENSSSCG00000004791	804.522	871.465	907.384	3945.54	10546	6466.71	20.55	15.09	19.14	91.9	177.91	119.92	18.26	129.91	2.83075	5.51959e-15	4.90612e-12
ENSSSCG00000004802	252.571	728.36	846.011	1254.81	2944.5	2114.65	6.45	12.61	17.85	29.23	49.67	39.21	12.3033	39.37	1.67805	4.2275e-05	0.000810586
ENSSSCG00000004803	194.43	936.21	696.455	244.718	164.908	119.11	4.97	16.21	14.69	5.7	2.78	2.21	11.9567	3.56333	-1.74652	0.00115839	0.00934822
ENSSSCG00000004806	291.316	726.809	972.39	1266.48	2798.76	2075.03	7.44	12.59	20.51	29.5	47.21	38.48	13.5133	38.3967	1.5066	0.000193212	0.00248396
ENSSSCG00000004823	1102.36	2192.73	1829.9	3584.48	5667.4	4346.83	28.16	37.97	38.6	83.49	95.61	80.61	34.91	86.57	1.31023	2.51612e-05	0.000532494
ENSSSCG00000004830	90.1847	316.708	274.665	340.896	614.816	879.819	2.3	5.48	5.79	7.94	10.37	16.31	4.52333	11.54	1.35119	0.004723	0.0256875
ENSSSCG00000004854	1057.67	3255.55	3196.51	3070.48	7516.01	5650.1	27.02	56.38	67.43	71.52	126.79	104.77	50.2767	101.027	1.00678	0.00864369	0.0392968
ENSSSCG00000004856	922.264	920.351	705.946	2224.29	3917.72	2289.66	23.56	15.94	14.89	51.81	66.09	42.46	18.13	53.4533	1.5599	5.03482e-06	0.000148467
ENSSSCG00000004859	23.3404	238.719	237.022	536.623	656.909	686.869	0.6	4.13	5	12.5	11.08	12.74	3.24333	12.1067	1.90025	0.0015906	0.0116638
ENSSSCG00000004861	280.657	873.42	838.156	1243.74	1437.58	1557.04	7.17	15.13	17.68	28.97	24.25	28.87	13.3267	27.3633	1.03793	0.00711056	0.0341224
ENSSSCG00000004884	443.946	1157.13	1108.24	1511.06	2695.36	2460.63	11.34	20.04	23.38	35.2	45.47	45.63	18.2533	42.1	1.20566	0.000716289	0.00666153
ENSSSCG00000004893	1305.07	3510.24	3339.55	5643.9	8657.5	8756.77	33.33	60.79	70.45	131.46	146.05	162.38	54.8567	146.63	1.41844	8.61723e-05	0.00136951
ENSSSCG00000004897	302.426	768.42	837.004	1115.98	1695.38	2427.31	7.72	13.31	17.66	25.99	28.6	45.01	12.8967	33.2	1.36419	0.000532557	0.00533743
ENSSSCG00000004898	699.484	2361.99	2000.72	3286.17	5822.08	6164.39	17.87	40.9	42.21	76.55	98.22	114.31	33.66	96.36	1.5174	5.08428e-05	0.000931794
ENSSSCG00000004902	45.8162	78.518	69.3938	143.497	323.99	382.35	1.17	1.36	1.46	3.34	5.47	7.09	1.33	5.3	1.99457	2.37683e-05	0.000509953
ENSSSCG00000004917	460.006	686.444	522.548	1467.19	1992.83	1700.73	11.75	11.89	11.02	34.18	33.62	31.54	11.5533	33.1133	1.5191	3.01664e-06	9.80132e-05
ENSSSCG00000004923	12467.5	18967.2	13358.6	8394.74	6289.88	8035.65	318.45	328.46	281.82	195.54	106.11	149.01	309.577	150.22	-1.04322	0.00241401	0.0159543
ENSSSCG00000004931	160.152	195.939	150.919	316.927	694.901	377.806	4.09	3.39	3.18	7.38	11.72	7.01	3.55333	8.70333	1.2924	0.00252703	0.0164296
ENSSSCG00000004934	584.671	1795.13	1566.84	2270.46	3333.27	3546.88	14.93	31.09	33.05	52.89	56.23	65.77	26.3567	58.2967	1.14525	0.00146961	0.0109969
ENSSSCG00000004938	447.867	1074.87	1346.83	1890.8	4208.23	3301.85	11.44	18.61	28.41	44.04	70.99	61.23	19.4867	58.7533	1.59218	3.11872e-05	0.00064254
ENSSSCG00000004946	339.564	508.196	721.764	961.852	1537.79	1537.8	8.67	8.8	15.23	22.4	25.94	28.52	10.9	25.62	1.23294	0.000789601	0.00712014
ENSSSCG00000004958	698.803	1430.64	1250.55	1877.18	3967.8	3790.71	17.85	24.77	26.38	43.73	66.93	70.29	23	60.3167	1.39092	3.90826e-05	0.000763778
ENSSSCG00000004969	272.628	808.523	1126.99	1499.06	3261.12	2255.03	6.96	14	23.78	34.92	55.01	41.82	14.9133	43.9167	1.55817	0.000259494	0.00310197
ENSSSCG00000004979	20.5259	218.108	255.815	485.059	1135.23	1204.85	0.52	3.78	5.4	11.3	19.15	22.34	3.23333	17.5967	2.44421	0.000116922	0.00171473
ENSSSCG00000004980	12.8547	82.7209	117.42	202.72	345.296	359.677	0.33	1.43	2.48	4.72	5.82	6.67	1.41333	5.73667	2.02111	0.000783854	0.00708372
ENSSSCG00000004996	431.277	934.827	903.316	1616.91	1856.21	1955.14	11.02	16.19	19.06	37.66	31.31	36.25	15.4233	35.0733	1.18526	0.000572692	0.00566051
ENSSSCG00000004999	349.713	825.916	1126.43	1955.87	3402.86	2820.14	8.93	14.3	23.76	45.56	57.4	52.3	15.6633	51.7533	1.72426	6.55786e-06	0.000181347
ENSSSCG00000005000	40.7306	162.266	262.126	306.806	723.428	606.327	1.04	2.81	5.53	7.15	12.2	11.24	3.12667	10.1967	1.7054	0.00218022	0.0147931
ENSSSCG00000005022	102.193	399.746	504.788	1141.06	2302.99	2260.99	2.61	6.92	10.65	26.58	38.85	41.93	6.72667	35.7867	2.41146	3.04974e-07	1.58129e-05
ENSSSCG00000005039	224.389	980.488	941.686	1244.92	2233.95	1698.39	5.73	16.98	19.87	29	37.69	31.49	14.1933	32.7267	1.20525	0.00505746	0.0269876
ENSSSCG00000005052	232.379	562.518	695.954	788.407	1877.08	1240.91	5.94	9.74	14.68	18.36	31.67	23.01	10.12	24.3467	1.26651	0.00213848	0.0145815
ENSSSCG00000005056	307.545	986.427	1312.17	2093.86	4543.66	3180.42	7.86	17.08	27.68	48.77	76.65	58.98	17.54	61.4667	1.80916	2.29836e-05	0.000498607
ENSSSCG00000005066	1111.63	2386.8	1624.72	2795.16	3828.4	4346.94	28.39	41.33	34.28	65.11	64.58	80.61	34.6667	70.1	1.01587	0.00119465	0.00959113
ENSSSCG00000005073	474.682	1087.67	920.13	1783.06	2837.3	2493.43	12.12	18.84	19.41	41.53	47.86	46.24	16.79	45.21	1.42904	1.84371e-05	0.000417837
ENSSSCG00000005082	196.505	668.999	480.264	845.522	1228.64	967.4	5.02	11.59	10.13	19.69	20.73	17.94	8.91333	19.4533	1.12598	0.00492685	0.0264374
ENSSSCG00000005096	1234.64	2783.09	2478.2	4296.91	7943.9	6432.71	31.54	48.2	52.28	100.09	134.01	119.28	44.0067	117.793	1.42046	2.02683e-05	0.000446406
ENSSSCG00000005106	39.9182	61.2804	54.2139	109.15	273.434	90.9178	1.02	1.06	1.14	2.54	4.61	1.69	1.07333	2.94667	1.45699	0.0037004	0.0216492
ENSSSCG00000005122	281.539	1010.5	896.593	1140.92	1903.52	1600.53	7.19	17.5	18.91	26.58	32.11	29.68	14.5333	29.4567	1.01923	0.00957573	0.0424663
ENSSSCG00000005135	714.75	1569.61	1200.98	1884.19	3043.51	2666.4	18.26	27.18	25.34	43.89	51.34	49.44	23.5933	48.2233	1.03135	0.00121409	0.00972212
ENSSSCG00000005170	10.5222	474.782	652.798	922.49	2118.38	2301.6	0.27	8.22	13.77	21.49	35.74	42.68	7.42	33.3033	2.16618	0.0065478	0.0322186
ENSSSCG00000005173	254.905	700.406	707.981	1469.91	2675.24	2087.82	6.51	12.13	14.94	34.24	45.13	38.72	11.1933	39.3633	1.81421	1.67519e-06	6.29789e-05
ENSSSCG00000005180	2.94635	33.2058	32.1549	56.1575	160.849	166.465	0.08	0.58	0.68	1.31	2.71	3.09	0.446667	2.37	2.40762	0.000175313	0.00231347
ENSSSCG00000005183	234.499	886.997	1074.54	2266.11	5005.5	3564.49	5.99	15.36	22.67	52.79	84.44	66.1	14.6733	67.7767	2.20759	6.53268e-07	2.94538e-05
ENSSSCG00000005194	125.631	550.281	383.357	457.776	618.99	1711.57	3.21	9.53	8.09	10.66	10.44	31.74	6.94333	17.6133	1.34297	0.0113205	0.0481074
ENSSSCG00000005198	313.907	895.153	888.792	1434.14	3250.61	2429.59	8.02	15.5	18.75	33.41	54.84	45.05	14.09	44.4333	1.65697	1.67558e-05	0.000392674
ENSSSCG00000005199	71.5878	69.477	63.6298	250.086	335.784	330.077	1.83	1.2	1.34	5.83	5.66	6.12	1.45667	5.87	2.01069	6.25085e-06	0.000175193
ENSSSCG00000005201	803.011	1660.97	1478.66	2231.28	3437.2	3167.56	20.51	28.76	31.19	51.97	57.98	58.74	26.82	56.23	1.06803	0.000827527	0.00737133
ENSSSCG00000005203	325.539	631.045	524.152	1431.93	2452.93	1752.95	8.32	10.93	11.06	33.35	41.38	32.51	10.1033	35.7467	1.82298	7.96765e-08	5.32213e-06
ENSSSCG00000005205	200.724	635.995	532.969	788.177	1386.65	1386.1	5.13	11.01	11.24	18.36	23.39	25.7	9.12667	22.4833	1.3007	0.0011479	0.00931072
ENSSSCG00000005207	437.552	989.282	1288.21	1524.91	2134.93	2156.35	11.18	17.13	27.18	35.52	36.02	39.99	18.4967	37.1767	1.00713	0.00635985	0.0314805
ENSSSCG00000005208	453.187	1127	942.022	1362.29	2609.51	2389.34	11.58	19.52	19.87	31.73	44.02	44.31	16.99	40.02	1.23604	0.000388785	0.00431159
ENSSSCG00000005215	652.628	1847.8	1578.53	2016.8	3097.08	3930.51	16.67	32	33.3	46.98	52.25	72.89	27.3233	57.3733	1.07025	0.00298404	0.0185256
ENSSSCG00000005222	5512.84	9706.39	2278.88	18309	29858.6	15300.7	140.81	168.09	48.08	426.48	503.7	283.73	118.993	404.637	1.76575	8.46065e-05	0.00135327
ENSSSCG00000005224	79.1992	180.599	119.516	260.322	505.517	386.372	2.02	3.13	2.52	6.06	8.53	7.16	2.55667	7.25	1.50372	0.000530299	0.00532468
ENSSSCG00000005240	1147.8	2364.52	2345.92	4692.35	9850.87	6544.1	29.32	40.95	49.49	109.3	166.18	121.35	39.92	132.277	1.72837	5.65462e-07	2.64534e-05
ENSSSCG00000005252	16.6683	56.6254	76.183	288.78	568.803	718.405	0.43	0.98	1.61	6.73	9.6	13.32	1.00667	9.88333	3.29541	2.85523e-09	3.77983e-07
ENSSSCG00000005255	565.225	1067.36	960.378	1610.87	2218.43	2070.59	14.44	18.48	20.26	37.52	37.42	38.4	17.7267	37.78	1.0917	0.000701013	0.00656883
ENSSSCG00000005269	18.4457	587.64	288.344	983.66	901.783	1601.4	0.47	10.18	6.08	22.91	15.21	29.7	5.57667	22.6067	2.01927	0.00431948	0.0240392
ENSSSCG00000005271	1261.25	2493.73	2074.56	3089.75	5525.12	4298.62	32.22	43.18	43.77	71.97	93.21	79.71	39.7233	81.63	1.03911	0.000847478	0.00751676
ENSSSCG00000005277	334.461	563.26	610.956	1301.36	1812.5	1252.69	8.54	9.75	12.89	30.31	30.58	23.23	10.3933	28.04	1.43183	4.59265e-05	0.000865923
ENSSSCG00000005287	327.18	771.637	432.073	1736.23	1091.67	1675.52	8.36	13.36	9.12	40.44	18.42	31.07	10.28	29.9767	1.544	7.85611e-05	0.00128009
ENSSSCG00000005288	1006.94	2649.58	1869.51	3297.51	5581.5	3654.04	25.72	45.88	39.44	76.81	94.16	67.76	37.0133	79.5767	1.1043	0.000898609	0.00786377
ENSSSCG00000005316	32342.4	27288	25180.5	6585.13	5775.51	7240.94	826.1	472.55	531.22	153.39	97.43	134.27	609.957	128.363	-2.24847	1.53972e-09	2.26245e-07
ENSSSCG00000005317	8246.1	15244.4	14644.7	22336.1	40760.3	26776	210.62	263.99	308.95	520.28	687.61	496.52	261.187	568.137	1.12116	0.000977353	0.00831886
ENSSSCG00000005360	276.839	88.8854	240.774	784.089	2266.26	1660.75	7.07	1.54	5.08	18.26	38.23	30.8	4.56333	29.0967	2.67269	3.04355e-07	1.58129e-05
ENSSSCG00000005367	124.729	1275.7	1253.26	1618.3	2884.13	2721.63	3.19	22.09	26.44	37.7	48.65	50.47	17.24	45.6067	1.40348	0.0104129	0.0453704
ENSSSCG00000005380	2580.82	8354.13	5622.43	2600.98	2683.63	2351.31	65.92	144.67	118.61	60.59	45.27	43.6	109.733	49.82	-1.1392	0.00148062	0.0110659
ENSSSCG00000005382	755.344	1892.49	1840.51	2755.87	4801.49	4096.12	19.29	32.77	38.83	64.19	81	75.96	30.2967	73.7167	1.28283	0.000176439	0.00231604
ENSSSCG00000005388	278.299	554.388	515.224	736.334	1427.77	1045.49	7.11	9.6	10.87	17.15	24.09	19.39	9.19333	20.21	1.13641	0.00202444	0.0139916
ENSSSCG00000005403	542.159	1294.18	1698.57	3262.36	8517.63	7005.34	13.85	22.41	35.83	75.99	143.69	129.9	24.03	116.527	2.27775	2.10685e-08	1.77147e-06
ENSSSCG00000005423	379.189	1505.95	1107.67	1787.62	3263.37	3981.46	9.69	26.08	23.37	41.64	55.05	73.83	19.7133	56.84	1.52773	0.000152256	0.00209125
ENSSSCG00000005441	245.279	489.624	652.466	840.407	1711.33	1249	6.27	8.48	13.76	19.58	28.87	23.16	9.50333	23.87	1.32869	0.000755892	0.00689613
ENSSSCG00000005453	94275.8	24948.7	7043.98	10697.6	11191.7	12323.2	2408.02	432.04	148.6	249.18	188.8	228.51	996.22	222.163	-2.16484	0.00212094	0.0144864
ENSSSCG00000005456	98.7651	139.31	138.388	261.596	442.39	397.538	2.52	2.41	2.92	6.09	7.46	7.37	2.61667	6.97333	1.41412	0.00074411	0.00682869
ENSSSCG00000005466	2568.49	5651.16	6512.79	7007.17	13948.9	11753.8	65.61	97.86	137.4	163.22	235.31	217.96	100.29	205.497	1.03494	0.0042289	0.0236834
ENSSSCG00000005471	166.039	302.45	270.836	399.667	854.995	706.267	4.24	5.24	5.71	9.31	14.42	13.1	5.06333	12.2767	1.27776	0.00143041	0.010801
ENSSSCG00000005508	40.4134	238.16	278.713	616.263	1634.07	1354.54	1.03	4.12	5.88	14.35	27.57	25.12	3.67667	22.3467	2.60359	2.8083e-06	9.37332e-05
ENSSSCG00000005510	546.696	1140.85	1222.39	2376.85	4140.51	2807.11	13.96	19.76	25.79	55.36	69.85	52.05	19.8367	59.0867	1.57466	4.32597e-06	0.000131298
ENSSSCG00000005596	2240.55	2379.81	2521.52	3991.19	9162.97	5205.91	57.23	41.21	53.19	92.97	154.58	96.54	50.5433	114.697	1.18223	0.000457208	0.00481753
ENSSSCG00000005602	754.384	1826.67	1990.98	2604.24	5787.82	5313.66	19.27	31.63	42	60.66	97.64	98.53	30.9667	85.61	1.46706	5.99151e-05	0.00104423
ENSSSCG00000005651	439.139	1608.86	1871.66	2705.99	4706.93	3485.53	11.22	27.86	39.49	63.03	79.4	64.63	26.19	69.02	1.398	0.000720822	0.00667901
ENSSSCG00000005663	1798.17	2674.67	2558.79	999.153	967.765	1413.06	45.93	46.32	53.98	23.27	16.33	26.2	48.7433	21.9333	-1.15208	0.000389096	0.00431159
ENSSSCG00000005667	1022.03	1968.06	1920.52	2788.79	5194.58	3459.39	26.11	34.08	40.52	64.96	87.63	64.15	33.57	72.2467	1.10576	0.000632574	0.00606711
ENSSSCG00000005715	1538.08	5115.87	4366.78	8333.87	12266.1	10487.7	39.29	88.59	92.12	194.12	206.92	194.48	73.3333	198.507	1.43665	0.000132851	0.00188643
ENSSSCG00000005719	2547.87	4391.13	4136.56	6389.02	10920.9	7608.44	65.08	76.04	87.27	148.82	184.23	141.09	76.13	158.047	1.05381	0.00125104	0.00987232
ENSSSCG00000005724	1388.82	1977.02	2638.94	2949.06	5797.36	8617.04	35.47	34.24	55.67	68.69	97.8	159.79	41.7933	108.76	1.3798	0.00025342	0.00306793
ENSSSCG00000005731	288.998	848.219	708.026	1063.49	1886.36	1211.85	7.38	14.69	14.94	24.77	31.82	22.47	12.3367	26.3533	1.09503	0.00372874	0.021706
ENSSSCG00000005738	835.784	1759.57	1704.07	2706.83	4546.64	2819.45	21.35	30.47	35.95	63.05	76.7	52.28	29.2567	64.01	1.12953	0.000727443	0.00672034
ENSSSCG00000005832	9063.16	8577.99	3429.09	3949.14	3079.24	3252.92	231.49	148.55	72.34	91.99	51.95	60.32	150.793	68.0867	-1.14713	0.00711842	0.0341224
ENSSSCG00000005842	3601.24	3228.85	1627.46	1119.44	1561.07	1747.33	91.98	55.91	34.33	26.08	26.33	32.4	60.74	28.27	-1.10338	0.00327535	0.0198049
ENSSSCG00000005848	587.549	191.939	135.191	39.9019	36.2179	55.221	15.01	3.32	2.85	0.93	0.61	1.02	7.06	0.853333	-3.04849	4.35981e-06	0.000132004
ENSSSCG00000005904	10268.5	9611	5186.96	4142.6	4904.85	3845.82	262.28	166.44	109.43	96.49	82.74	71.31	179.383	83.5133	-1.10297	0.003236	0.0196433
ENSSSCG00000005908	2516.03	3640.23	1841.68	1303.8	1237.83	1585.19	64.27	63.04	38.85	30.37	20.88	29.39	55.3867	26.88	-1.04301	0.00210073	0.0143793
ENSSSCG00000005911	1881.36	4330.92	1929.26	1485.86	903.502	1431.51	48.05	75	40.7	34.61	15.24	26.55	54.5833	25.4667	-1.09985	0.00382322	0.0220529
ENSSSCG00000005930	248.403	664.817	536.06	1052.68	1853.91	1288.67	6.34	11.51	11.31	24.52	31.27	23.9	9.72	26.5633	1.45041	9.21828e-05	0.00144474
ENSSSCG00000005935	167.896	396.295	358.531	660.836	1436.26	1338.31	4.29	6.86	7.56	15.39	24.23	24.82	6.23667	21.48	1.78415	8.70981e-06	0.000230606
ENSSSCG00000005941	136.603	118.917	181.269	230.336	452.869	397.308	3.49	2.06	3.82	5.37	7.64	7.37	3.12333	6.79333	1.12103	0.0117047	0.0493573
ENSSSCG00000005949	1171.23	1472.22	1217.59	2606.45	4045.71	2319.7	29.92	25.49	25.69	60.71	68.25	43.02	27.0333	57.3267	1.08447	0.000827119	0.00737133
ENSSSCG00000005950	353.193	1075.08	1045.74	1432.24	2052.97	2018.55	9.02	18.62	22.06	33.36	34.63	37.43	16.5667	35.14	1.08483	0.00381887	0.0220418
ENSSSCG00000005959	3007.83	3556.83	3415.11	6342.73	11773.2	7022.49	76.83	61.59	72.05	147.74	198.61	130.22	70.1567	158.857	1.17907	0.000402202	0.00442529
ENSSSCG00000005962	1916.33	2619.96	4333.51	1334.73	1479.3	1431.63	48.95	45.37	91.42	31.09	24.96	26.55	61.9133	27.5333	-1.16907	0.000912193	0.00795265
ENSSSCG00000005975	666.054	1186	1140.11	1844.8	3014.48	1994.69	17.01	20.54	24.05	42.97	50.85	36.99	20.5333	43.6033	1.08647	0.000836027	0.00742578
ENSSSCG00000005979	15776.3	37007.8	17068.6	8964.3	6548.95	11335.8	402.96	640.87	360.09	208.81	110.48	210.21	467.973	176.5	-1.40676	0.000238161	0.00291988
ENSSSCG00000005983	253.287	940.333	1261.01	1870.33	4295.14	3246.03	6.47	16.28	26.6	43.57	72.46	60.19	16.45	58.74	1.83626	4.8472e-05	0.000897598
ENSSSCG00000005992	1368.79	1245.85	984.703	217.528	671.038	288.167	34.96	21.57	20.77	5.07	11.32	5.34	25.7667	7.24333	-1.83078	1.83445e-05	0.000417329
ENSSSCG00000005995	98.2998	301.293	333.89	479.236	918.017	581.168	2.51	5.22	7.04	11.16	15.49	10.78	4.92333	12.4767	1.34153	0.00325075	0.0197136
ENSSSCG00000006014	2089.61	6735.31	7349.67	8639.26	18046.1	13367.4	53.37	116.64	155.05	201.24	304.43	247.88	108.353	251.183	1.213	0.00268725	0.0171312
ENSSSCG00000006018	53.0357	115.233	181.317	275.711	559.909	507.886	1.35	2	3.83	6.42	9.45	9.42	2.39333	8.43	1.81651	0.000211806	0.00266092
ENSSSCG00000006037	321.015	976.198	1077.05	1426.84	2249.99	1953.5	8.2	16.9	22.72	33.24	37.96	36.22	15.94	35.8067	1.16758	0.00265233	0.0170044
ENSSSCG00000006048	223.412	775.023	869.143	999.036	1933.43	1398.31	5.71	13.42	18.34	23.27	32.62	25.93	12.49	27.2733	1.12672	0.00755607	0.0356691
ENSSSCG00000006066	1083.67	2431.76	2401.57	3036.58	5715.49	5712.64	27.68	42.11	50.66	70.73	96.42	105.93	40.15	91.0267	1.18089	0.000498391	0.00512137
ENSSSCG00000006071	94.5636	925.292	858.744	1846.92	3451.67	3300.24	2.42	16.02	18.12	43.02	58.23	61.2	12.1867	54.15	2.15166	8.3573e-05	0.00133846
ENSSSCG00000006073	576.494	1314.08	295.298	1497.87	1913.75	1544.27	14.72	22.76	6.23	34.89	32.28	28.64	14.57	31.9367	1.13221	0.00813176	0.0374981
ENSSSCG00000006095	218.79	399.15	474.135	844.425	1400.11	1164.2	5.59	6.91	10	19.67	23.62	21.59	7.5	21.6267	1.52785	5.154e-05	0.000939039
ENSSSCG00000006098	31.3906	108.917	179.854	280.703	382.547	429.664	0.8	1.89	3.79	6.54	6.45	7.97	2.16	6.98667	1.69357	0.00173187	0.0124502
ENSSSCG00000006100	1394.65	2613.29	2448.11	3090.19	6170.07	5569.47	35.62	45.25	51.65	71.98	104.09	103.28	44.1733	93.1167	1.07586	0.000854416	0.00755139
ENSSSCG00000006101	22.0715	65.0467	65.2669	97.888	236.113	169.666	0.56	1.13	1.38	2.28	3.98	3.15	1.02333	3.13667	1.61596	0.00115241	0.00932271
ENSSSCG00000006120	191.578	513.519	832.309	964.738	1453.86	1492.9	4.89	8.89	17.56	22.47	24.53	27.68	10.4467	24.8933	1.25272	0.00472017	0.0256834
ENSSSCG00000006143	226.676	1939.8	144.278	2149.55	3800.91	1639.27	5.79	33.59	3.04	50.07	64.12	30.4	14.14	48.1967	1.76915	0.0077547	0.0362575
ENSSSCG00000006163	278.594	683.868	744.077	887.801	1898.69	1299.23	7.12	11.84	15.7	20.68	32.03	24.09	11.5533	25.6	1.14783	0.00303802	0.0187834
ENSSSCG00000006177	671.979	1140.3	1126.4	1699.81	2674.32	2207.17	17.16	19.75	23.76	39.59	45.11	40.93	20.2233	41.8767	1.05013	0.000995014	0.00844608
ENSSSCG00000006179	306.041	508.616	524.595	1244.25	3808.8	2414.45	7.82	8.81	11.07	28.98	64.25	44.77	9.23333	46	2.31671	1.19099e-09	1.82972e-07
ENSSSCG00000006194	560.886	1722.16	1569.74	2071.96	3256.15	3680.13	14.33	29.82	33.12	48.26	54.93	68.24	25.7567	57.1433	1.14964	0.00176961	0.0126409
ENSSSCG00000006201	1349.95	4207.13	3527.57	4219.65	7386.04	7882.65	34.48	72.86	74.42	98.29	124.6	146.17	60.5867	123.02	1.02182	0.00558261	0.0288617
ENSSSCG00000006209	588.486	1247.8	1287.93	1698.59	2976.79	4261.52	15.03	21.61	27.17	39.57	50.22	79.02	21.27	56.27	1.40355	0.000138972	0.00194312
ENSSSCG00000006218	505.864	691.541	608.102	1328.11	2424.72	1502.56	12.92	11.98	12.83	30.94	40.9	27.86	12.5767	33.2333	1.40188	2.9274e-05	0.000609173
ENSSSCG00000006231	376.49	1291.34	1263.85	2650.13	3680.9	3244.08	9.62	22.36	26.66	61.73	62.1	60.16	19.5467	61.33	1.64967	1.75259e-05	0.000404624
ENSSSCG00000006235	294.555	748.459	645.944	1173.18	3318.12	2013.84	7.52	12.96	13.63	27.33	55.98	37.34	11.37	40.2167	1.82256	2.80959e-06	9.37332e-05
ENSSSCG00000006236	658.867	1417.21	1344.25	1982.9	3129.69	2198.93	16.83	24.54	28.36	46.19	52.8	40.78	23.2433	46.59	1.0032	0.00240582	0.015916
ENSSSCG00000006239	226.174	388.545	451.953	561.342	1056.88	830.539	5.78	6.73	9.53	13.08	17.83	15.4	7.34667	15.4367	1.0712	0.00569938	0.0293337
ENSSSCG00000006243	974.297	1293.33	1557.26	604.314	466.062	800.035	24.89	22.4	32.85	14.08	7.86	14.84	26.7133	12.26	-1.1236	0.00238475	0.0158102
ENSSSCG00000006251	132.598	565.892	573.417	960.779	1697.98	1204.23	3.39	9.8	12.1	22.38	28.64	22.33	8.43	24.45	1.53623	0.000640661	0.00611993
ENSSSCG00000006261	1705.37	3314.37	4702.3	10063.5	20287.5	15496.7	43.56	57.4	99.2	234.41	342.24	287.36	66.72	288.003	2.10989	5.03935e-08	3.73029e-06
ENSSSCG00000006274	156.886	1214.62	864.162	1759.5	2433.71	2411.13	4.01	21.03	18.23	40.98	41.06	44.71	14.4233	42.25	1.55055	0.00131658	0.0102206
ENSSSCG00000006284	441.941	396.747	471.488	1128.98	2680.96	1625.91	11.29	6.87	9.95	26.3	45.23	30.15	9.37	33.8933	1.85488	6.16089e-07	2.81861e-05
ENSSSCG00000006287	1252.91	1716.59	1134.29	3795.38	5715.19	3391.98	32	29.73	23.93	88.41	96.41	62.9	28.5533	82.5733	1.53202	2.10279e-06	7.43384e-05
ENSSSCG00000006289	98.8208	88.4099	149.009	317.575	478.333	305.72	2.52	1.53	3.14	7.4	8.07	5.67	2.39667	7.04667	1.55591	0.000648292	0.00617714
ENSSSCG00000006307	1246.25	1757.25	1933.96	4534.57	10937.7	6330.02	31.83	30.43	40.8	105.62	184.51	117.38	34.3533	135.837	1.98335	1.21652e-08	1.19049e-06
ENSSSCG00000006309	4167.08	2855.11	2522.17	6157.56	13855.8	7465.84	106.44	49.44	53.21	143.43	233.74	138.44	69.6967	171.87	1.30216	0.000947579	0.00813351
ENSSSCG00000006310	13.2818	17.099	17.9935	64.1729	151.591	151.874	0.34	0.3	0.38	1.49	2.56	2.82	0.34	2.29	2.75174	1.18026e-07	7.14352e-06
ENSSSCG00000006333	441.973	691.44	1094.05	1480.6	2308.58	1909	11.29	11.97	23.08	34.49	38.94	35.4	15.4467	36.2767	1.23175	0.000778083	0.00704179
ENSSSCG00000006335	366.311	769.574	724.956	1340.1	1934.93	2021.61	9.36	13.33	15.29	31.22	32.64	37.49	12.66	33.7833	1.41603	3.79279e-05	0.000751552
ENSSSCG00000006337	1465.4	1823.49	1680.5	805.8	837.745	912.755	37.43	31.58	35.45	18.77	14.13	16.93	34.82	16.61	-1.06786	0.0010172	0.00855275
ENSSSCG00000006338	22.0425	76.6007	86.3809	151.247	312.723	400.074	0.56	1.33	1.82	3.52	5.28	7.42	1.23667	5.40667	2.12828	6.77187e-05	0.00114341
ENSSSCG00000006353	2693.04	3218.27	2694.08	1130.89	699.189	1836.31	68.79	55.73	56.84	26.34	11.79	34.05	60.4533	24.06	-1.32919	0.000621706	0.00601595
ENSSSCG00000006361	1957.69	1805.71	974.389	875.503	861.973	771.859	50	31.27	20.56	20.39	14.54	14.31	33.9433	16.4133	-1.04826	0.00653796	0.0321956
ENSSSCG00000006372	3216.98	3159.59	2897.37	7992.78	13265.2	8458.81	82.17	54.72	61.12	186.18	223.78	156.86	66.0033	188.94	1.51732	8.56606e-06	0.000228257
ENSSSCG00000006374	273.22	614.506	560.039	634.675	1492.06	1062.71	6.98	10.64	11.81	14.78	25.17	19.71	9.81	19.8867	1.01948	0.00797891	0.0370069
ENSSSCG00000006375	433.579	630.594	762.349	1951.72	3897.6	2707.52	11.07	10.92	16.08	45.46	65.75	50.21	12.69	53.8067	2.08409	1.09475e-09	1.70288e-07
ENSSSCG00000006376	177.894	287.583	441.383	976.701	1434.83	1345.05	4.54	4.98	9.31	22.75	24.2	24.94	6.27667	23.9633	1.93276	1.14296e-06	4.5733e-05
ENSSSCG00000006378	587.199	1035.52	1323.22	1459.35	2747.39	2672.44	15	17.93	27.92	33.99	46.35	49.56	20.2833	43.3	1.09407	0.00182967	0.012966
ENSSSCG00000006379	2089.16	1782.38	1904.84	3935.68	7563.84	5289.56	53.36	30.87	40.19	91.67	127.6	98.09	41.4733	105.787	1.3509	5.39475e-05	0.00096872
ENSSSCG00000006380	96.2489	146.009	197.592	504.479	766.221	645.756	2.46	2.53	4.17	11.75	12.93	11.97	3.05333	12.2167	2.00039	2.6616e-06	8.97099e-05
ENSSSCG00000006381	285.334	418.893	439.108	1833.96	3685.24	3217.49	7.29	7.25	9.26	42.72	62.17	59.66	7.93333	54.85	2.78949	9.13969e-16	9.47785e-13
ENSSSCG00000006382	333.783	340.63	430.755	1325.06	2227.65	2146.35	8.53	5.9	9.09	30.87	37.58	39.8	7.84	36.0833	2.20241	4.31789e-10	7.90173e-08
ENSSSCG00000006383	6.06579	78.0774	104.522	284.315	505.138	354.923	0.15	1.35	2.21	6.62	8.52	6.58	1.23667	7.24	2.54953	0.00015789	0.00214966
ENSSSCG00000006418	1161.98	1525.25	1558.75	2236.4	3803.36	3829.92	29.68	26.41	32.88	52.09	64.16	71.02	29.6567	62.4233	1.07373	0.000627484	0.00603456
ENSSSCG00000006453	19.8541	198.156	231.521	412.829	593.162	480.152	0.51	3.43	4.88	9.62	10.01	8.9	2.94	9.51	1.69363	0.00609794	0.0306473
ENSSSCG00000006456	71.3877	108.705	171.773	703.003	1094.36	650.852	1.82	1.88	3.62	16.38	18.46	12.07	2.44	15.6367	2.67998	3.07449e-09	3.98531e-07
ENSSSCG00000006457	263.359	325.666	430.15	1848.11	3721.66	2383.44	6.73	5.64	9.07	43.05	62.78	44.2	7.14667	50.01	2.80687	9.86016e-15	8.17999e-12
ENSSSCG00000006458	97.3813	102.452	93.1514	428.405	418.409	256.812	2.49	1.77	1.97	9.98	7.06	4.76	2.07667	7.26667	1.80702	9.17782e-05	0.00144048
ENSSSCG00000006474	554.187	1005.7	1644.04	524.167	378.028	377.181	14.16	17.42	34.68	12.21	6.38	6.99	22.0867	8.52667	-1.37312	0.0018265	0.0129583
ENSSSCG00000006482	1144.47	2355.21	1986.86	3186.02	5203.91	3862.46	29.23	40.79	41.92	74.21	87.79	71.62	37.3133	77.8733	1.06144	0.000728889	0.00672372
ENSSSCG00000006495	1621.85	1601.1	1499.63	4022.71	6240.31	3443.99	41.43	27.73	31.64	93.7	105.27	63.86	33.6	87.61	1.38263	3.27837e-05	0.000668788
ENSSSCG00000006508	496.836	1592.51	1516.69	2077.05	3515.87	3550.39	12.69	27.58	32	48.38	59.31	65.84	24.09	57.8433	1.26372	0.000760078	0.00692082
ENSSSCG00000006512	8177.46	6666.5	6119.79	2849.36	4604.68	3565.43	208.87	115.44	129.11	66.37	77.68	66.12	151.14	70.0567	-1.10929	0.00142053	0.01075
ENSSSCG00000006543	1011.33	1967.42	2620.14	2482.03	3344.54	6714.76	25.83	34.07	55.28	57.81	56.42	124.51	38.3933	79.58	1.05155	0.00876	0.0396975
ENSSSCG00000006550	83.0319	754.958	670.067	1763.42	2982.57	2117.74	2.12	13.07	14.14	41.08	50.31	39.27	9.77667	43.5533	2.15537	5.57594e-05	0.000988419
ENSSSCG00000006553	1645.84	3454.31	3509.19	4738.61	9125.24	5980.59	42.04	59.82	74.03	110.38	153.94	110.9	58.63	125.073	1.09306	0.00144154	0.0108653
ENSSSCG00000006562	180.324	623.092	615.675	1106.86	1690.94	1243.41	4.61	10.79	12.99	25.78	28.53	23.06	9.46333	25.79	1.44639	0.000481114	0.00500166
ENSSSCG00000006572	502.675	1106.9	983.277	438.668	559.148	334.875	12.84	19.17	20.74	10.22	9.43	6.21	17.5833	8.62	-1.02845	0.00857708	0.0390535
ENSSSCG00000006612	15038.5	16440.5	14418.7	6338.83	7634.63	7823.32	384.12	284.7	304.18	147.65	128.79	145.07	324.333	140.503	-1.20687	0.000207162	0.00262289
ENSSSCG00000006619	48.911	445.807	555.521	872.726	1645.68	1556.14	1.25	7.72	11.72	20.33	27.76	28.86	6.89667	25.65	1.89499	0.0011163	0.009151
ENSSSCG00000006625	775.814	1994.94	2251.73	3144.08	6214.27	4997.14	19.82	34.55	47.5	73.24	104.83	92.66	33.9567	90.2433	1.41013	0.000101214	0.00154083
ENSSSCG00000006636	62.5238	202.225	250.028	325.424	691.601	609.558	1.6	3.5	5.27	7.58	11.67	11.3	3.45667	10.1833	1.55876	0.00156007	0.0115067
ENSSSCG00000006691	376.847	1325.03	1045.39	1411.44	2459.78	2061.57	9.63	22.95	22.05	32.88	41.5	38.23	18.21	37.5367	1.04357	0.00553878	0.0287066
ENSSSCG00000006709	818.646	1670.33	1807.8	3532.22	6707.29	5220.75	20.91	28.93	38.14	82.28	113.15	96.81	29.3267	97.4133	1.73191	2.84764e-07	1.50792e-05
ENSSSCG00000006717	419.986	474.361	307.812	1522.18	1518.3	1567.55	10.73	8.21	6.49	35.46	25.61	29.07	8.47667	30.0467	1.82564	4.49431e-07	2.19322e-05
ENSSSCG00000006730	315.042	1104.23	1048.63	1308.61	2157.79	2506.63	8.05	19.12	22.12	30.48	36.4	46.48	16.43	37.7867	1.20154	0.00271297	0.0172863
ENSSSCG00000006734	144.044	236.588	219.948	399.861	605.072	554.919	3.68	4.1	4.64	9.31	10.21	10.29	4.14	9.93667	1.26313	0.00155007	0.0114543
ENSSSCG00000006736	3124.46	2457.29	2520.56	5676.19	11844.2	9613.78	79.81	42.55	53.17	132.22	199.81	178.27	58.51	170.1	1.53963	1.9935e-05	0.000442195
ENSSSCG00000006738	380.447	939	769.511	1037.52	1672.63	1809.88	9.72	16.26	16.23	24.17	28.22	33.56	14.07	28.65	1.02591	0.00372564	0.021706
ENSSSCG00000006743	18.2317	65.5577	74.4081	150.361	342.88	319.753	0.47	1.14	1.57	3.5	5.78	5.93	1.06	5.07	2.25792	1.96449e-05	0.000437318
ENSSSCG00000006746	3.00338	68.9123	31.8195	79.1188	152.043	135.829	0.08	1.19	0.67	1.84	2.56	2.52	0.646667	2.30667	1.83472	0.00546257	0.0284063
ENSSSCG00000006748	188.414	380.269	330.967	113.1	163.347	132.162	4.81	6.59	6.98	2.63	2.76	2.45	6.12667	2.61333	-1.22921	0.00384423	0.0221266
ENSSSCG00000006751	72.6268	174.82	253.055	353.802	553.153	534.462	1.86	3.03	5.34	8.24	9.33	9.91	3.41	9.16	1.42558	0.00241416	0.0159543
ENSSSCG00000006757	220.749	629.944	586.782	923.281	1830.81	1553.05	5.64	10.91	12.38	21.51	30.88	28.8	9.64333	27.0633	1.48874	0.00013376	0.00189148
ENSSSCG00000006758	6.98413	15.3547	9.55823	47.4194	95.7931	64.5709	0.18	0.27	0.2	1.1	1.62	1.2	0.216667	1.30667	2.59234	1.05659e-06	4.32507e-05
ENSSSCG00000006760	80.3421	1462.7	1606.62	3056.74	6365.61	5924.1	2.05	25.33	33.89	71.2	107.38	109.85	20.4233	96.1433	2.23497	0.00064328	0.00613879
ENSSSCG00000006764	282.436	431.642	379.32	967.6	2181.97	1464.27	7.21	7.47	8	22.54	36.81	27.15	7.56	28.8333	1.93128	7.3704e-08	5.04869e-06
ENSSSCG00000006767	64.6619	940.001	606.221	1166.94	1830.66	2091.09	1.65	16.28	12.79	27.18	30.88	38.78	10.24	32.28	1.65642	0.00433429	0.0240984
ENSSSCG00000006777	18813.7	26118.5	12358.3	7668.88	6120.18	12828.1	480.55	452.3	260.72	178.63	103.24	237.88	397.857	173.25	-1.19939	0.0024016	0.0158965
ENSSSCG00000006781	27.2367	406.928	427.933	603.502	1174.02	1385.06	0.7	7.05	9.03	14.06	19.81	25.68	5.59333	19.85	1.82736	0.00486687	0.0261892
ENSSSCG00000006799	173.218	392.808	427.156	532.821	879.504	828.601	4.42	6.8	9.01	12.41	14.84	15.37	6.74333	14.2067	1.07503	0.00772455	0.0361641
ENSSSCG00000006800	4850.5	4379.15	4846.23	8431.81	17818.2	11033.4	123.89	75.83	102.24	196.4	300.59	204.6	100.653	233.863	1.21627	0.000501816	0.00513537
ENSSSCG00000006802	186.071	253.617	301.795	521.189	1083.14	955.641	4.75	4.39	6.37	12.14	18.27	17.72	5.17	16.0433	1.63374	3.79211e-05	0.000751552
ENSSSCG00000006809	443.468	575.973	594.49	897.727	1500.32	1403.97	11.33	9.97	12.54	20.91	25.31	26.03	11.28	24.0833	1.09427	0.00140433	0.0106778
ENSSSCG00000006821	825.323	534.55	478.294	195.611	183.491	260.918	21.08	9.26	10.09	4.56	3.1	4.84	13.4767	4.16667	-1.6935	0.000197423	0.00253045
ENSSSCG00000006850	98.2436	652.628	522.402	1188.73	2894.68	1941.95	2.51	11.3	11.02	27.69	48.83	36.01	8.27667	37.51	2.18015	1.24497e-05	0.000312346
ENSSSCG00000006860	359.195	1328.08	1287.46	1651.74	3159.2	2958.53	9.17	23	27.16	38.47	53.29	54.86	19.7767	48.8733	1.30525	0.00115241	0.00932271
ENSSSCG00000006862	3917.42	3699	4227.14	10408	16839.9	13046.1	100.06	64.06	89.18	242.44	284.08	241.92	84.4333	256.147	1.60109	2.01562e-06	7.18694e-05
ENSSSCG00000006866	294.185	699.35	642.938	920.01	1459.47	1106.01	7.51	12.11	13.56	21.43	24.62	20.51	11.06	22.1867	1.00434	0.00606049	0.0305331
ENSSSCG00000006869	114.369	251.091	270.035	658.86	922.604	978.513	2.92	4.35	5.7	15.35	15.56	18.14	4.32333	16.35	1.91907	2.52257e-06	8.64763e-05
ENSSSCG00000006897	74.5623	162.091	176.314	234.401	392.262	343.974	1.9	2.81	3.72	5.46	6.62	6.38	2.81	6.15333	1.1308	0.010618	0.0460224
ENSSSCG00000006898	454.963	874.922	969.892	1520.42	3334.01	2494.83	11.62	15.15	20.46	35.42	56.24	46.26	15.7433	45.9733	1.54606	1.16598e-05	0.000297326
ENSSSCG00000006900	157.483	291.736	318.436	475.483	1508.82	1132.06	4.02	5.05	6.72	11.08	25.45	20.99	5.26333	19.1733	1.86505	1.75042e-05	0.000404624
ENSSSCG00000006923	412.804	1238.6	1691.36	1440.19	2374.51	5371.06	10.54	21.45	35.68	33.55	40.06	99.6	22.5567	57.7367	1.35593	0.00535664	0.0280311
ENSSSCG00000006955	12982.5	11040.2	10075.6	5669.89	5934.9	7036.43	331.6	191.19	212.56	132.07	100.12	130.48	245.117	120.89	-1.01977	0.00342977	0.0204211
ENSSSCG00000006994	685.043	2160.3	2065.03	2508.17	4925.82	4324.79	17.5	37.41	43.56	58.42	83.1	80.2	32.8233	73.9067	1.17098	0.00168577	0.0121997
ENSSSCG00000007007	205.443	194.263	239.785	454.222	628.357	895.282	5.25	3.36	5.06	10.58	10.6	16.6	4.55667	12.5933	1.46661	0.000462312	0.00485896
ENSSSCG00000007023	50.7564	461.777	580.193	1291.1	2594.54	2757.98	1.3	8	12.24	30.07	43.77	51.14	7.18	41.66	2.53661	1.60725e-05	0.000381018
ENSSSCG00000007034	123.569	406.29	408.063	451.246	815.253	937.42	3.16	7.04	8.61	10.51	13.75	17.38	6.27	13.88	1.14647	0.0104038	0.0453466
ENSSSCG00000007065	5.04326	11.0054	9.94167	1.04381	2.22789	0	0.13	0.19	0.21	0.02	0.04	0	0.176667	0.02	-3.14296	0.000800724	0.00719437
ENSSSCG00000007073	27.435	95.2708	55.6511	80.819	248.588	200.944	0.7	1.65	1.17	1.88	4.19	3.73	1.17333	3.26667	1.47721	0.0039772	0.0227029
ENSSSCG00000007100	251.852	782.989	596.322	216.942	306.542	271.526	6.43	13.56	12.58	5.05	5.17	5.04	10.8567	5.08667	-1.09379	0.0102862	0.0449287
ENSSSCG00000007140	383.351	408.721	349.563	762.493	1477.85	981.489	9.79	7.08	7.37	17.76	24.93	18.2	8.08	20.2967	1.32882	0.000331852	0.0038279
ENSSSCG00000007146	54.9467	85.6904	149.27	379.913	961.23	723.643	1.4	1.48	3.15	8.85	16.22	13.42	2.01	12.83	2.67425	5.93647e-08	4.27014e-06
ENSSSCG00000007181	48.6032	53.8182	31.3997	110.59	228.802	73.7177	1.24	0.93	0.66	2.58	3.86	1.37	0.943333	2.60333	1.46452	0.0048265	0.0260342
ENSSSCG00000007185	58.8473	93.1244	83.3522	213.295	467.601	369.22	1.5	1.61	1.76	4.97	7.89	6.85	1.62333	6.57	2.01693	5.92714e-06	0.000168396
ENSSSCG00000007235	953.526	2388.45	3167.63	3927.92	8890.28	5934.14	24.36	41.36	66.83	91.49	149.97	110.04	44.1833	117.167	1.40699	0.00034956	0.00398345
ENSSSCG00000007240	830.715	799.061	854.486	1451.82	3152.84	1658.01	21.22	13.84	18.03	33.82	53.19	30.75	17.6967	39.2533	1.14934	0.00106942	0.00888971
ENSSSCG00000007252	157.223	288.987	296.865	478.059	853.017	498.827	4.02	5	6.26	11.14	14.39	9.25	5.09333	11.5933	1.18661	0.00380228	0.0219932
ENSSSCG00000007253	1679.28	5229.05	5076.7	6977.82	12484.2	10086.6	42.89	90.55	107.1	162.54	210.6	187.04	80.18	186.727	1.21961	0.0013331	0.0103102
ENSSSCG00000007308	4026.89	3867.95	3504.41	1974.6	1955.97	1602.12	102.86	66.98	73.93	45.99	33	29.71	81.2567	36.2333	-1.16517	0.000427137	0.00460465
ENSSSCG00000007309	4053.22	7206.2	6942.32	11276.9	13767.8	13931.5	103.53	124.79	146.46	262.68	232.26	258.34	124.927	251.093	1.00714	0.00200902	0.01392
ENSSSCG00000007323	76.4463	257.181	363.927	494.423	966.263	655.333	1.95	4.45	7.68	11.52	16.3	12.15	4.69333	13.3233	1.50527	0.00217506	0.0147742
ENSSSCG00000007324	198.789	316.761	278.988	529.226	954.649	1140.84	5.08	5.49	5.89	12.33	16.1	21.16	5.48667	16.53	1.59108	4.89832e-05	0.000904372
ENSSSCG00000007331	616.704	1587.46	1965.98	2174.11	5100.03	3521.8	15.75	27.49	41.47	50.64	86.04	65.31	28.2367	67.33	1.25368	0.00121741	0.00972785
ENSSSCG00000007342	498.484	1696.15	1618.24	1850.95	3933.08	2913.5	12.73	29.37	34.14	43.11	66.35	54.03	25.4133	54.4967	1.10058	0.00454496	0.0249592
ENSSSCG00000007350	505.036	1469.36	851.619	4519.54	8437.9	5083.27	12.9	25.45	17.97	105.27	142.34	94.26	18.7733	113.957	2.60173	7.15117e-13	2.96631e-10
ENSSSCG00000007355	1535.54	5499.31	6273.42	7307.34	15426.9	11464.5	39.22	95.23	132.35	170.21	260.24	212.59	88.9333	214.347	1.26915	0.00264183	0.0169633
ENSSSCG00000007356	618.673	1777.02	1747.53	2974.23	3465.79	2667.44	15.8	30.77	36.87	69.28	58.47	49.46	27.8133	59.07	1.08665	0.00287877	0.0180835
ENSSSCG00000007360	319.12	726.571	765.699	1220.67	1914.4	1726.88	8.15	12.58	16.15	28.43	32.3	32.02	12.2933	30.9167	1.33051	0.000209137	0.00264412
ENSSSCG00000007366	2158.77	3258.68	3940.85	6695.87	15106.3	8735.97	55.14	56.43	83.14	155.97	254.84	161.99	64.9033	190.933	1.5567	1.34127e-05	0.000329857
ENSSSCG00000007369	391.849	836.332	900.701	302.164	486.71	245.218	10.01	14.48	19	7.04	8.21	4.55	14.4967	6.6	-1.13518	0.0065621	0.032238
ENSSSCG00000007383	487.214	304.867	368.998	627.577	1682.66	1149.22	12.44	5.28	7.78	14.62	28.39	21.31	8.5	21.44	1.33477	0.00167921	0.0121772
ENSSSCG00000007425	2252.65	2154.38	1728.13	980.234	1093.17	942.774	57.54	37.31	36.46	22.83	18.44	17.48	43.77	19.5833	-1.16032	0.000561269	0.00558308
ENSSSCG00000007454	746.57	1834.73	1866.83	2636.19	4226.54	2893.13	19.07	31.77	39.38	61.41	71.3	53.65	30.0733	62.12	1.04657	0.0025927	0.0167169
ENSSSCG00000007458	1028.26	1647.02	1634.02	3779.1	7372.26	6247.4	26.26	28.52	34.47	88.03	124.37	115.85	29.75	109.417	1.87887	5.56971e-09	6.41754e-07
ENSSSCG00000007469	703.548	1801.23	2203.62	3327	5951.04	4508.95	17.97	31.19	46.49	77.5	100.39	83.61	31.8833	87.1667	1.45097	8.79757e-05	0.0013893
ENSSSCG00000007473	695.728	2882.12	2645.58	3493.36	5656.18	4581.15	17.77	49.91	55.81	81.37	95.42	84.95	41.1633	87.2467	1.08374	0.00624407	0.0310681
ENSSSCG00000007477	494.293	641.617	520.021	1514.37	2955.09	1848.17	12.63	11.11	10.97	35.27	49.85	34.27	11.57	39.7967	1.78226	1.39617e-07	8.08091e-06
ENSSSCG00000007484	402.628	1209.68	1223.52	2059.92	3606.76	2208.52	10.28	20.95	25.81	47.98	60.84	40.95	19.0133	49.9233	1.3927	0.000247917	0.00300984
ENSSSCG00000007495	146.811	251.316	135.848	642.952	1116.67	533.495	3.75	4.35	2.87	14.98	18.84	9.89	3.65667	14.57	1.9944	2.91616e-06	9.60018e-05
ENSSSCG00000007504	1534.54	2105.37	1887.8	4008.87	8614.48	4680.99	39.2	36.46	39.83	93.38	145.32	86.8	38.4967	108.5	1.49489	5.62552e-06	0.000161299
ENSSSCG00000007508	475.092	818.771	1513.12	953.033	1667.78	7645.84	12.13	14.18	31.92	22.2	28.13	141.78	19.41	64.0367	1.7221	0.00470573	0.0256609
ENSSSCG00000007512	228.669	404.634	477.632	884.187	944.642	937.241	5.84	7.01	10.08	20.6	15.94	17.38	7.64333	17.9733	1.23358	0.00139329	0.0106108
ENSSSCG00000007526	127.053	223.866	173.319	958.174	1472.19	1333.46	3.25	3.88	3.66	22.32	24.84	24.73	3.59667	23.9633	2.7361	3.62042e-13	1.70305e-10
ENSSSCG00000007542	269.547	320.369	329.9	141.226	188.303	82.4027	6.88	5.55	6.96	3.29	3.18	1.53	6.46333	2.66667	-1.27724	0.0053545	0.0280311
ENSSSCG00000007596	48.6415	54.7034	44.2389	185.84	554.554	185.399	1.24	0.95	0.93	4.33	9.36	3.44	1.04	5.71	2.45691	2.56907e-06	8.75875e-05
ENSSSCG00000007606	1593.31	3115.29	3232.49	5670.46	9582.35	7112.39	40.7	53.95	68.19	132.08	161.65	131.89	54.28	141.873	1.38611	3.63467e-05	0.000726001
ENSSSCG00000007637	928.709	2223.02	1765.44	3702.3	5084.84	3801.89	23.72	38.5	37.24	86.24	85.78	70.5	33.1533	80.84	1.28592	7.58759e-05	0.00124894
ENSSSCG00000007691	51.5144	13.8646	14.9014	99.4231	324.745	161.721	1.32	0.24	0.31	2.32	5.48	3	0.623333	3.6	2.52992	0.00011158	0.00166288
ENSSSCG00000007705	164.192	870.945	1078.22	1353.3	2170	1683.61	4.19	15.08	22.75	31.52	36.61	31.22	14.0067	33.1167	1.24144	0.0100948	0.0442948
ENSSSCG00000007719	388.85	740.378	786.455	1056.71	2216.43	1268.71	9.93	12.82	16.59	24.61	37.39	23.53	13.1133	28.51	1.12043	0.00198893	0.0138113
ENSSSCG00000007722	720.263	486.562	378.125	1326.28	3182.61	1135.69	18.4	8.43	7.98	30.89	53.69	21.06	11.6033	35.2133	1.60158	0.000324797	0.0037668
ENSSSCG00000007754	916.839	1958.49	1643.76	3526.04	5289.74	3204.48	23.42	33.92	34.68	82.13	89.24	59.42	30.6733	76.93	1.32656	5.31521e-05	0.000960196
ENSSSCG00000007789	45.3078	407.451	652.184	2709.09	5366.56	4691.73	1.16	7.06	13.76	63.1	90.53	87	7.32667	80.21	3.45255	3.61728e-08	2.84895e-06
ENSSSCG00000007797	1144.28	1470.19	1554.12	3937.04	6240.62	4095.62	29.23	25.46	32.79	91.71	105.28	75.95	29.16	90.98	1.64156	1.841e-07	1.03662e-05
ENSSSCG00000007807	1251.37	818.381	1127.32	4455.86	8106.84	3868.17	31.96	14.17	23.78	103.79	136.76	71.73	23.3033	104.093	2.15927	2.07889e-08	1.77147e-06
ENSSSCG00000007808	94.9882	436.133	520.372	635.213	1235.94	874.146	2.43	7.55	10.98	14.8	20.85	16.21	6.98667	17.2867	1.30698	0.00820357	0.0377394
ENSSSCG00000007812	1816.53	3328.65	2793.88	5161.32	9157.55	6225.14	46.4	57.64	58.94	120.22	154.48	115.44	54.3267	130.047	1.2593	9.62007e-05	0.00148756
ENSSSCG00000007816	1417.18	681.91	787.33	2764.14	4990.9	3279.25	36.2	11.81	16.61	64.39	84.19	60.81	21.54	69.7967	1.69614	3.90973e-05	0.000763778
ENSSSCG00000007830	711.888	2051.69	1911.8	2750.26	3605.67	3878.05	18.18	35.53	40.33	64.06	60.83	71.91	31.3467	65.6	1.06538	0.00254744	0.0165106
ENSSSCG00000007849	630.384	953	683.561	351.004	452.648	337.732	16.1	16.5	14.42	8.18	7.64	6.26	15.6733	7.36	-1.09053	0.00309328	0.019037
ENSSSCG00000007855	405.556	702.611	596.396	1210.58	1865.6	1367.23	10.36	12.17	12.58	28.2	31.47	25.35	11.7033	28.34	1.27592	0.000133414	0.00188874
ENSSSCG00000007872	51.4988	195.495	333.708	1071.91	1574.47	924.38	1.32	3.39	7.04	24.97	26.56	17.14	3.91667	22.89	2.54702	1.85821e-06	6.75568e-05
ENSSSCG00000007874	574.906	1404.54	1385.29	2040.64	3446.67	1865.72	14.68	24.32	29.22	47.53	58.14	34.6	22.74	46.7567	1.03994	0.0038033	0.0219932
ENSSSCG00000007878	512.255	1119.07	1081.99	1423.82	2723.58	1755.33	13.08	19.38	22.83	33.17	45.95	32.55	18.43	37.2233	1.01415	0.00346765	0.0206054
ENSSSCG00000007901	2874.1	2332.12	2467.16	5430.78	7546.8	4426.03	73.41	40.39	52.05	126.5	127.31	82.07	55.2833	111.96	1.01807	0.00340886	0.0203452
ENSSSCG00000007907	2208.84	5883.06	5446.07	7196.8	14084.7	10269.1	56.42	101.88	114.89	167.64	237.6	190.43	91.0633	198.557	1.12461	0.00188939	0.0132531
ENSSSCG00000007924	1639.27	3464.73	3206.68	4653.74	7405.45	5986.56	41.87	60	67.65	108.4	124.93	111.01	56.5067	114.78	1.02238	0.00163306	0.0119068
ENSSSCG00000007932	11314	9414.35	4546.57	3825.36	3688.17	3687.04	288.99	163.03	95.92	89.11	62.22	68.37	182.647	73.2333	-1.31848	0.00125997	0.00992349
ENSSSCG00000007949	168.337	460.001	383.374	110.746	81.0946	78.0502	4.3	7.97	8.09	2.58	1.37	1.45	6.78667	1.8	-1.91471	7.8591e-05	0.00128009
ENSSSCG00000007951	855.769	2824.63	2397.94	4441.39	6733.88	5543.16	21.86	48.91	50.59	103.45	113.6	102.79	40.4533	106.613	1.39806	0.000116339	0.00171126
ENSSSCG00000007954	166.46	298.148	264.004	1209.71	2753.84	1703.8	4.25	5.16	5.57	28.18	46.46	31.59	4.99333	35.41	2.82608	4.47124e-14	2.92843e-11
ENSSSCG00000007956	264.144	378.457	356.386	1606.12	3188.66	2262.52	6.75	6.55	7.52	37.41	53.79	41.95	6.94	44.3833	2.67701	1.13119e-14	8.79782e-12
ENSSSCG00000007978	8036.66	5444.71	1941.37	3088.86	783.098	1307.74	205.28	94.29	40.96	71.95	13.21	24.25	113.51	36.47	-1.63804	0.00651263	0.032109
ENSSSCG00000007980	7838.44	8776.31	6379.79	2947.13	3287.61	3352.9	200.21	151.98	134.59	68.65	55.46	62.17	162.26	62.0933	-1.3858	3.17569e-05	0.000651703
ENSSSCG00000007986	152.013	191.935	121.375	77.7023	70.0221	52.4182	3.88	3.32	2.56	1.81	1.18	0.97	3.25333	1.32	-1.30138	0.00533454	0.0279562
ENSSSCG00000007995	4944.79	4368.96	3800.24	2032.66	2361.91	2859.18	126.3	75.66	80.17	47.35	39.84	53.02	94.0433	46.7367	-1.00877	0.00226864	0.015232
ENSSSCG00000008003	569.393	664.289	558.69	271.889	241.969	317.404	14.54	11.5	11.79	6.33	4.08	5.89	12.61	5.43333	-1.21466	0.00216021	0.01469
ENSSSCG00000008009	6807.22	6348.9	4066.79	2303.52	2291.09	2521.89	173.87	109.94	85.79	53.66	38.65	46.76	123.2	46.3567	-1.41015	6.70102e-05	0.00113717
ENSSSCG00000008011	28.4283	13.084	5.87025	3.0547	3.42682	6.569	0.73	0.23	0.12	0.07	0.06	0.12	0.36	0.0833333	-2.11103	0.00486785	0.0261892
ENSSSCG00000008026	261.976	1096.07	905.359	1653.13	1695.25	1571.85	6.69	18.98	19.1	38.51	28.6	29.15	14.9233	32.0867	1.1044	0.0075956	0.0357217
ENSSSCG00000008061	11438.7	6434.09	4823.59	3692.31	4730.51	3512.7	292.17	111.42	101.76	86.01	79.8	65.14	168.45	76.9833	-1.1297	0.00710904	0.0341224
ENSSSCG00000008068	520.589	3681.43	3445.08	4575.62	8389.57	6307.67	13.3	63.75	72.68	106.58	141.53	116.97	49.91	121.693	1.28585	0.00824602	0.0379067
ENSSSCG00000008070	43.3752	128.384	88.3396	147.208	271.679	201.871	1.11	2.22	1.86	3.43	4.58	3.74	1.73	3.91667	1.17885	0.0105914	0.045987
ENSSSCG00000008072	463.251	998.668	1388.57	416.416	357.859	576.819	11.83	17.29	29.29	9.7	6.04	10.7	19.47	8.81333	-1.14349	0.00764275	0.0358621
ENSSSCG00000008096	101.079	345.178	323.818	461.461	800.623	661.728	2.58	5.98	6.83	10.75	13.51	12.27	5.13	12.1767	1.24709	0.00515	0.0273089
ENSSSCG00000008098	300.669	996.642	1122.09	1393.76	2589.14	1840.81	7.68	17.26	23.67	32.47	43.68	34.14	16.2033	36.7633	1.18198	0.00371165	0.0216768
ENSSSCG00000008105	753.951	1499.27	1561.84	2173.33	3760.42	2663.28	19.26	25.96	32.95	50.62	63.44	49.39	26.0567	54.4833	1.06416	0.00132131	0.0102381
ENSSSCG00000008124	21.9714	39.7747	60.624	225.244	241.56	745.969	0.56	0.69	1.28	5.25	4.08	13.83	0.843333	7.72	3.19443	8.11788e-08	5.37334e-06
ENSSSCG00000008125	446.206	997.192	1422.21	1784.23	3402.56	2285.41	11.4	17.27	30	41.56	57.4	42.38	19.5567	47.1133	1.26847	0.000939192	0.00811055
ENSSSCG00000008127	3833.12	6691.97	6387.3	9142.89	17688.8	10685.6	97.91	115.89	134.75	212.97	298.4	198.15	116.183	236.507	1.02548	0.0023451	0.0156223
ENSSSCG00000008136	2701.91	7694.84	7000.22	8651.88	14148	14095.1	69.01	133.25	147.68	201.53	238.67	261.37	116.647	233.857	1.00348	0.00586879	0.0298818
ENSSSCG00000008164	2178.29	3462.36	3031.52	4082.83	9600.09	6051.6	55.64	59.96	63.95	95.1	161.95	112.22	59.85	123.09	1.04029	0.00174057	0.0124911
ENSSSCG00000008179	458.825	1199.46	1208.06	1821.17	2870.31	2134.32	11.72	20.77	25.49	42.42	48.42	39.58	19.3267	43.4733	1.16954	0.0010619	0.00883902
ENSSSCG00000008190	556.579	1464.87	1056.14	1785.6	2935.26	1997.69	14.22	25.37	22.28	41.59	49.52	37.04	20.6233	42.7167	1.05052	0.0020604	0.0141343
ENSSSCG00000008192	1521.35	4163.06	3746.34	6237.69	11773.1	8698.94	38.86	72.09	79.03	145.3	198.61	161.31	63.3267	168.407	1.41106	0.000106613	0.0015965
ENSSSCG00000008193	1540.93	1217.55	1032.61	2379.23	4104.94	2626.47	39.36	21.08	21.78	55.42	69.25	48.7	27.4067	57.79	1.07629	0.00222964	0.0150383
ENSSSCG00000008207	1106.84	2239.01	2301.6	3545.86	6915.13	4415.64	28.27	38.77	48.56	82.59	116.65	81.88	38.5333	93.7067	1.28204	0.000126232	0.0018202
ENSSSCG00000008213	236.492	238.293	555.595	1098.41	2066.87	1119.08	6.04	4.13	11.72	25.59	34.87	20.75	7.29667	27.07	1.89139	1.66795e-05	0.000391622
ENSSSCG00000008214	194156	214810	107429	21313.9	5300.24	30052.4	4959.2	3719.89	2266.35	496.47	89.41	557.28	3648.48	381.053	-3.25923	1.91861e-08	1.67037e-06
ENSSSCG00000008217	846.111	1177.88	1651.49	2841.78	5863.21	3875.31	21.61	20.4	34.84	66.19	98.91	71.86	25.6167	78.9867	1.62453	2.33433e-06	8.1368e-05
ENSSSCG00000008230	423.231	548.903	618.767	289.534	292.913	208.511	10.81	9.51	13.05	6.74	4.94	3.87	11.1233	5.18333	-1.10164	0.00740627	0.0351635
ENSSSCG00000008292	755.607	2939.26	2761.29	3663.75	5068.98	5679.81	19.3	50.9	58.25	85.34	85.51	105.32	42.8167	92.0567	1.10435	0.00476997	0.0258301
ENSSSCG00000008294	46216.1	55989.8	48910.2	12590.9	7839.41	10550.1	1180.47	969.58	1031.83	293.28	132.25	195.64	1060.63	207.057	-2.35682	7.77411e-10	1.27291e-07
ENSSSCG00000008304	5366.71	5980.9	5036.18	2731.99	3301.59	2549.72	137.08	103.57	106.25	63.64	55.7	47.28	115.633	55.54	-1.05796	0.000912672	0.00795265
ENSSSCG00000008344	1980.73	1961.28	2128.94	4031.02	8258.8	4118.95	50.59	33.96	44.91	93.9	139.32	76.38	43.1533	103.2	1.2579	0.000243144	0.00296537
ENSSSCG00000008346	485.921	1616.48	1639.44	1947.62	3392.55	3564.69	12.41	27.99	34.59	45.37	57.23	66.1	24.9967	56.2333	1.16969	0.00255967	0.016564
ENSSSCG00000008348	327.338	791.424	1056.66	1759.23	3875.8	2419.61	8.36	13.71	22.29	40.98	65.38	44.87	14.7867	50.41	1.76941	8.79213e-06	0.000232291
ENSSSCG00000008382	336.279	2612.95	2300	4487.92	8262.21	7992.99	8.59	45.25	48.52	104.54	139.38	148.22	34.12	130.713	1.93772	0.000123757	0.00179283
ENSSSCG00000008386	65.3349	91.4856	114.765	160.219	288.177	227.818	1.67	1.58	2.42	3.73	4.86	4.22	1.89	4.27	1.17585	0.00777969	0.0362858
ENSSSCG00000008388	286.371	687.52	727.045	1581.34	3203.34	3089.56	7.31	11.91	15.34	36.83	54.04	57.29	11.52	49.3867	2.09998	2.09637e-08	1.77147e-06
ENSSSCG00000008406	215.102	543.975	619.194	730.792	1196.59	1062.03	5.49	9.42	13.06	17.02	20.19	19.69	9.32333	18.9667	1.02455	0.010562	0.0458915
ENSSSCG00000008428	563.692	1401.41	1877.02	2064.46	5055.13	3382.94	14.4	24.27	39.6	48.09	85.28	62.73	26.09	65.3667	1.32506	0.00086936	0.00764005
ENSSSCG00000008444	225.843	1129.86	745.887	1358	2128.36	1796.45	5.77	19.57	15.74	31.63	35.9	33.31	13.6933	33.6133	1.29556	0.00210622	0.014401
ENSSSCG00000008445	252.685	716.955	914.694	1261.05	1899.54	1420.2	6.45	12.42	19.3	29.37	32.04	26.34	12.7233	29.25	1.20096	0.0030418	0.0187852
ENSSSCG00000008451	527.477	2178.87	1963.46	2662.71	5133.2	4673.54	13.47	37.73	41.42	62.02	86.59	86.66	30.8733	78.4233	1.34492	0.000874671	0.00768131
ENSSSCG00000008480	405.487	277.539	278.481	131.531	152.451	154.611	10.36	4.81	5.87	3.06	2.57	2.87	7.01333	2.83333	-1.3076	0.00425137	0.0237985
ENSSSCG00000008495	921.46	1460.26	1432.24	2687.52	5337.84	3846.23	23.54	25.29	30.22	62.6	90.05	71.32	26.35	74.6567	1.50247	2.35412e-06	8.18286e-05
ENSSSCG00000008498	463.357	1253.38	1220.77	1939.55	3515.7	2735.81	11.84	21.71	25.75	45.18	59.31	50.73	19.7667	51.74	1.38821	0.00010072	0.00153799
ENSSSCG00000008499	70.6868	361.682	465.103	950.217	2096.54	2135.66	1.81	6.26	9.81	22.13	35.37	39.6	5.96	32.3667	2.44112	2.75585e-06	9.2436e-05
ENSSSCG00000008509	419.249	754.549	885.783	2720.35	6850.84	5115.31	10.71	13.07	18.69	63.37	115.57	94.86	14.1567	91.2667	2.68861	2.76509e-13	1.49604e-10
ENSSSCG00000008513	983.972	3343.89	2774.45	4992.92	8289.69	9417.53	25.13	57.91	58.53	116.3	139.84	174.63	47.19	143.59	1.6054	3.06166e-05	0.000633932
ENSSSCG00000008534	662.65	1353.07	1625.31	2173.26	3568.03	2538.17	16.93	23.43	34.29	50.62	60.19	47.07	24.8833	52.6267	1.08061	0.00176993	0.0126409
ENSSSCG00000008549	290.908	831.942	880.056	1067.69	1949.13	1636.94	7.43	14.41	18.57	24.87	32.88	30.35	13.47	29.3667	1.12443	0.00357128	0.0210123
ENSSSCG00000008554	1253.68	1569.95	778.227	384.386	343.774	370.174	32.02	27.19	16.42	8.95	5.8	6.86	25.21	7.20333	-1.80726	4.02123e-06	0.000123252
ENSSSCG00000008555	3871.09	4659.44	1075.07	720.299	532.334	943.81	98.88	80.69	22.68	16.78	8.98	17.5	67.4167	14.42	-2.22503	4.96286e-06	0.000146693
ENSSSCG00000008556	37678.1	32517.2	17892.4	13348.8	11405.4	14234.4	962.39	563.1	377.46	310.94	192.4	263.95	634.317	255.763	-1.31039	0.00101904	0.00856245
ENSSSCG00000008575	318.919	1494.34	1185.78	2012.82	3651.41	3702.66	8.15	25.88	25.02	46.89	61.6	68.66	19.6833	59.05	1.58496	0.000159813	0.00216871
ENSSSCG00000008576	414.588	337.084	334.899	725.472	1460.2	1016.86	10.59	5.84	7.07	16.9	24.63	18.86	7.83333	20.13	1.36165	0.000469692	0.0049034
ENSSSCG00000008583	791.077	1806.68	1738.64	3830	8107.62	6353.58	20.21	31.29	36.68	89.21	136.77	117.82	29.3933	114.6	1.96305	1.91951e-08	1.67037e-06
ENSSSCG00000008591	245.804	790.766	716.022	1361.19	2149.96	2026.38	6.28	13.69	15.11	31.71	36.27	37.58	11.6933	35.1867	1.58934	3.62973e-05	0.000726001
ENSSSCG00000008600	2025.45	4604.6	4307.32	6017.53	10472.3	8744.81	51.73	79.74	90.87	140.17	176.66	162.16	74.1133	159.663	1.10723	0.00123104	0.0097837
ENSSSCG00000008613	83.2123	172.99	268.628	486.951	768.832	688.897	2.13	3	5.67	11.34	12.97	12.77	3.6	12.36	1.77961	9.92094e-05	0.00152415
ENSSSCG00000008614	1803.39	2739.66	2968.18	5454.86	7717.58	4627.91	46.06	47.44	62.62	127.06	130.19	85.82	52.04	114.357	1.13585	0.000523178	0.00528444
ENSSSCG00000008629	245.81	1463.13	1364.76	2345.47	3435.75	4156.71	6.28	25.34	28.79	54.63	57.96	77.08	20.1367	63.2233	1.65063	0.000413306	0.00450366
ENSSSCG00000008631	577.935	1041.88	785.005	1470.79	2348.71	1468.1	14.76	18.04	16.56	34.26	39.62	27.22	16.4533	33.7	1.03437	0.00187325	0.0131699
ENSSSCG00000008641	213.848	900.561	1015.14	1623	2262.72	1771.58	5.46	15.6	21.42	37.8	38.17	32.85	14.16	36.2733	1.35709	0.00199	0.0138113
ENSSSCG00000008646	217.88	829.858	955.169	2279.4	4255.91	3515.71	5.57	14.37	20.15	53.09	71.8	65.19	13.3633	63.36	2.24529	1.92367e-07	1.07346e-05
ENSSSCG00000008648	104.072	385.116	1023.87	521.751	911.921	18865.6	2.66	6.67	21.6	12.15	15.38	349.83	10.31	125.787	3.60886	0.00059703	0.00584809
ENSSSCG00000008682	2026.15	3731.53	3829.72	5722.12	9265.44	6191.08	51.75	64.62	80.79	133.29	156.3	114.8	65.72	134.797	1.03638	0.00196908	0.0137043
ENSSSCG00000008686	165.341	163.301	86.7924	45.7031	72.4852	37.3796	4.22	2.83	1.83	1.06	1.22	0.69	2.96	0.99	-1.5801	0.00156102	0.0115067
ENSSSCG00000008710	222.214	395.931	421.392	703.719	1316.05	785.859	5.68	6.86	8.89	16.39	22.2	14.57	7.14333	17.72	1.31071	0.000753441	0.00687882
ENSSSCG00000008729	492.953	858.197	1168.22	1444.5	2674.53	2016.98	12.59	14.86	24.65	33.65	45.12	37.4	17.3667	38.7233	1.15688	0.00114108	0.00928082
ENSSSCG00000008735	263.876	897.401	1011.19	1762.09	2784.72	2439.71	6.74	15.54	21.33	41.04	46.98	45.24	14.5367	44.42	1.61151	6.81001e-05	0.00114829
ENSSSCG00000008741	82.8279	85.947	149.942	29.8535	62.9609	53.7287	2.12	1.49	3.16	0.7	1.06	1	2.25667	0.92	-1.29449	0.0077849	0.0362965
ENSSSCG00000008742	215.468	913.15	1367.73	2212.56	4072.32	3894.92	5.5	15.81	28.85	51.54	68.7	72.23	16.72	64.1567	1.94002	5.4474e-05	0.000969208
ENSSSCG00000008747	569.836	1415.49	1991.78	2257.68	4420.6	3193.47	14.55	24.51	42.02	52.59	74.57	59.22	27.0267	62.1267	1.20083	0.00205194	0.0140996
ENSSSCG00000008762	382.976	988.558	833.525	1306.13	2213.31	1364.94	9.78	17.12	17.58	30.42	37.34	25.31	14.8267	31.0233	1.06516	0.00311891	0.0191003
ENSSSCG00000008765	39.1885	154.558	189.822	227.781	569.527	389.54	1	2.68	4	5.31	9.61	7.22	2.56	7.38	1.52748	0.0040145	0.022832
ENSSSCG00000008768	387.628	836.428	871.319	1554.7	2500.98	2524.19	9.9	14.48	18.38	36.21	42.19	46.81	14.2533	41.7367	1.55002	8.50953e-06	0.000227237
ENSSSCG00000008787	298.776	629.24	661.959	1083.73	1935.48	1395.83	7.63	10.9	13.96	25.24	32.65	25.88	10.83	27.9233	1.36644	0.000147083	0.00203819
ENSSSCG00000008788	651.066	1463.45	1609.67	3389.34	11410.4	8259.51	16.63	25.34	33.96	78.95	192.49	153.16	25.31	141.533	2.48336	1.54539e-09	2.26245e-07
ENSSSCG00000008792	444.994	1134.11	1178.31	2160.01	3069.65	3047.97	11.37	19.64	24.86	50.31	51.78	56.52	18.6233	52.87	1.50534	2.003e-05	0.000442951
ENSSSCG00000008794	1351.66	1230.4	1217.6	4542.78	11736	7515.44	34.52	21.31	25.69	105.82	197.98	139.36	27.1733	147.72	2.4426	2.70878e-11	7.66093e-09
ENSSSCG00000008803	258.059	589.602	776.494	897.757	2225.24	2116.96	6.59	10.21	16.38	20.91	37.54	39.26	11.06	32.57	1.55819	0.0001628	0.00219271
ENSSSCG00000008812	492.423	824.953	974.28	1808.93	3436.42	2916.55	12.58	14.29	20.55	42.14	57.97	54.08	15.8067	51.3967	1.70114	4.85587e-07	2.34211e-05
ENSSSCG00000008819	209.664	336.65	230.331	555.347	1095.63	715.787	5.36	5.83	4.86	12.94	18.48	13.27	5.35	14.8967	1.47738	0.000127757	0.00183793
ENSSSCG00000008820	254.809	316.679	304.483	654.237	1403.85	1109.29	6.51	5.48	6.42	15.24	23.68	20.57	6.13667	19.83	1.69216	8.32327e-06	0.000222742
ENSSSCG00000008826	18.5164	610.326	811.705	1425.29	2592.21	2667.45	0.47	10.57	17.12	33.2	43.73	49.46	9.38667	42.13	2.16616	0.00383627	0.0220909
ENSSSCG00000008873	43.5572	226.306	249.467	313.421	615.996	662.752	1.11	3.92	5.26	7.3	10.39	12.29	3.43	9.99333	1.54276	0.00418188	0.0235284
ENSSSCG00000008881	345.229	820.865	863.483	1540.01	2274.9	1844.9	8.82	14.22	18.22	35.87	38.38	34.21	13.7533	36.1533	1.39435	0.000104555	0.00157516
ENSSSCG00000008890	145.541	559.997	643.784	1140.71	1465.56	1330.72	3.72	9.7	13.58	26.57	24.72	24.68	9	25.3233	1.49247	0.000776908	0.00703628
ENSSSCG00000008892	78.8553	225.37	179.742	385.479	506.767	596.43	2.01	3.9	3.79	8.98	8.55	11.06	3.23333	9.53	1.55945	0.000401879	0.00442529
ENSSSCG00000008900	1381.99	3174.21	3158.53	4062.49	7541.73	5641.76	35.3	54.97	66.63	94.63	127.23	104.62	52.3	108.827	1.05715	0.00189148	0.0132531
ENSSSCG00000008921	435.917	967.163	1068.33	1352.92	2159.8	1804.56	11.13	16.75	22.54	31.51	36.43	33.46	16.8067	33.8	1.00799	0.00437635	0.0242827
ENSSSCG00000008924	390.369	864.677	863.033	1166.9	1788.18	1792.82	9.97	14.97	18.21	27.18	30.17	33.25	14.3833	30.2	1.07015	0.00224992	0.015134
ENSSSCG00000008935	812.478	2050.74	1940.76	219.975	69.5051	400.902	20.75	35.51	40.94	5.12	1.17	7.43	32.4	4.57333	-2.82468	4.5292e-07	2.19489e-05
ENSSSCG00000008943	2003	4607.53	2635.96	5713.98	11267.2	6403.22	51.16	79.79	55.61	133.1	190.07	118.74	62.1867	147.303	1.24411	0.000386925	0.00429814
ENSSSCG00000008957	94.5939	197.586	166.945	397.214	424.713	368.816	2.42	3.42	3.52	9.25	7.16	6.84	3.12	7.75	1.31265	0.0020184	0.0139616
ENSSSCG00000008978	12.8999	23.8521	201.73	56.0336	126.572	2760.49	0.33	0.41	4.26	1.31	2.14	51.19	1.66667	18.2133	3.44996	0.00387195	0.0222655
ENSSSCG00000008986	457.152	1372.76	1403.12	2577.15	4338.31	2717.31	11.68	23.77	29.6	60.03	73.19	50.39	21.6833	61.2033	1.49702	7.85868e-05	0.00128009
ENSSSCG00000008988	672.224	1841.41	1061.39	2013.48	3070.98	2727.43	17.17	31.89	22.39	46.9	51.81	50.58	23.8167	49.7633	1.06311	0.00144408	0.0108778
ENSSSCG00000008989	1116.72	2611.6	2241.34	3513.46	7773.35	6637.39	28.52	45.23	47.28	81.84	131.13	123.08	40.3433	112.017	1.47331	1.8673e-05	0.000419435
ENSSSCG00000009002	304.919	220.022	390.384	580.24	1113.25	650.609	7.79	3.81	8.24	13.52	18.78	12.06	6.61333	14.7867	1.16085	0.00631562	0.0313239
ENSSSCG00000009007	1153.99	1348.11	1206.28	3106.46	6404.63	3440.53	29.48	23.35	25.45	72.36	108.04	63.8	26.0933	81.4	1.64135	7.50165e-07	3.28699e-05
ENSSSCG00000009012	484.655	407.292	400.123	956.195	1608.16	1195.81	12.38	7.05	8.44	22.27	27.13	22.17	9.29	23.8567	1.36064	0.000212845	0.00266195
ENSSSCG00000009037	144.659	390.168	383.274	600.232	846.81	1048.15	3.69	6.76	8.09	13.98	14.29	19.44	6.18	15.9033	1.36365	0.00108881	0.00900042
ENSSSCG00000009047	1689.15	4434.95	4719.68	6018.33	11208.8	9412.68	43.14	76.8	99.57	140.19	189.09	174.54	73.17	167.94	1.19862	0.00122528	0.00977399
ENSSSCG00000009050	159.442	371.172	286.069	375.189	968.535	973.448	4.07	6.43	6.04	8.74	16.34	18.05	5.51333	14.3767	1.38273	0.00114992	0.00931617
ENSSSCG00000009053	29.255	87.5175	91.4383	191.52	369.322	256.873	0.75	1.52	1.93	4.46	6.23	4.76	1.4	5.15	1.87915	0.000113366	0.00167944
ENSSSCG00000009061	802.306	1677.84	2262.14	2726.1	5127.37	4115.03	20.49	29.06	47.72	63.5	86.5	76.31	32.4233	75.4367	1.21823	0.00070785	0.00661297
ENSSSCG00000009071	265.927	583.447	552.633	1006.56	1277.68	1011.86	6.79	10.1	11.66	23.45	21.55	18.76	9.51667	21.2533	1.15916	0.00164549	0.0119816
ENSSSCG00000009074	354.414	580.913	441.882	971.635	1252.92	1024.67	9.05	10.06	9.32	22.63	21.14	19	9.47667	20.9233	1.14266	0.000987606	0.00839465
ENSSSCG00000009087	1.96635	6.83019	21.7685	101.702	114.752	129.068	0.05	0.12	0.46	2.37	1.94	2.39	0.21	2.23333	3.41074	1.0195e-07	6.43993e-06
ENSSSCG00000009090	440.55	1777.36	1463.45	2330.88	3327.72	4667.86	11.25	30.78	30.87	54.29	56.14	86.56	24.3	65.6633	1.43413	0.000415968	0.00451914
ENSSSCG00000009093	312.358	1101.9	1523.98	2217.14	4360.63	2800.25	7.98	19.08	32.15	51.64	73.56	51.93	19.7367	59.0433	1.5809	0.000337156	0.00386689
ENSSSCG00000009120	89.2796	220.054	232.189	534.253	1118.9	867.114	2.28	3.81	4.9	12.44	18.88	16.08	3.66333	15.8	2.1087	1.06766e-06	4.35605e-05
ENSSSCG00000009151	82.0658	339.809	255.914	529.513	743.595	517.02	2.1	5.88	5.4	12.33	12.54	9.59	4.46	11.4867	1.36484	0.0032438	0.0196811
ENSSSCG00000009157	17.4979	316.072	352.605	1050.42	1489.43	2423.14	0.45	5.47	7.44	24.47	25.13	44.93	4.45333	31.51	2.82285	4.08192e-05	0.000792114
ENSSSCG00000009172	889.443	1303.27	1202.82	1890.53	3481.7	2460.71	22.72	22.57	25.38	44.04	58.73	45.63	23.5567	49.4667	1.07032	0.000618374	0.00598837
ENSSSCG00000009193	270.82	732.019	762.403	1617.97	3229.89	2567.35	6.92	12.68	16.08	37.69	54.49	47.61	11.8933	46.5967	1.97007	2.10647e-07	1.16502e-05
ENSSSCG00000009203	55.3984	98.7051	209.17	42.8206	50.9489	40.6925	1.42	1.71	4.41	1	0.86	0.75	2.51333	0.87	-1.53051	0.00439538	0.0243635
ENSSSCG00000009208	598.442	2521.87	1998.9	3431.65	5349.79	3703.67	15.29	43.67	42.17	79.93	90.25	68.68	33.71	79.62	1.23995	0.00154897	0.011453
ENSSSCG00000009229	111.371	283.235	282.927	598.838	761.741	470.855	2.84	4.9	5.97	13.95	12.85	8.73	4.57	11.8433	1.37381	0.00168035	0.0121784
ENSSSCG00000009237	550.191	660.671	977.893	1659.81	4297.98	2646.83	14.05	11.44	20.63	38.66	72.5	49.08	15.3733	53.4133	1.79677	1.11381e-06	4.48552e-05
ENSSSCG00000009242	349.64	997.379	981.102	1317.54	2262.88	1753.08	8.93	17.27	20.7	30.69	38.17	32.51	15.6333	33.79	1.11197	0.00283851	0.017912
ENSSSCG00000009243	143.542	225.128	239.76	409.445	548.412	533.623	3.67	3.9	5.06	9.54	9.25	9.9	4.21	9.56333	1.18369	0.00332787	0.0200348
ENSSSCG00000009293	626.374	2126.32	2015.27	4350.72	5706.43	4464.89	16	36.82	42.51	101.34	96.26	82.79	31.7767	93.4633	1.55643	3.41221e-05	0.000689312
ENSSSCG00000009345	503.15	1247.03	1270.67	2105.24	3923.64	3282.01	12.85	21.59	26.81	49.04	66.19	60.86	20.4167	58.6967	1.52353	1.6529e-05	0.000389166
ENSSSCG00000009349	212.502	760.681	881.421	1158.32	2121	1299.2	5.43	13.17	18.59	26.98	35.78	24.09	12.3967	28.95	1.22361	0.00457679	0.0250786
ENSSSCG00000009370	894.492	1698.56	1396.16	2740.06	5249.6	3097.91	22.85	29.41	29.45	63.82	88.56	57.45	27.2367	69.9433	1.36064	3.01247e-05	0.00062583
ENSSSCG00000009378	125.931	887.243	1419.98	1571.09	3635.52	2531.6	3.22	15.36	29.96	36.6	61.33	46.94	16.18	48.29	1.57751	0.00513637	0.0272683
ENSSSCG00000009381	9.06365	139.853	183.085	268.635	542.841	515.852	0.23	2.42	3.86	6.26	9.16	9.57	2.17	8.33	1.94062	0.00518424	0.0274172
ENSSSCG00000009395	212.653	408.04	521.377	952.931	1359.24	1653.8	5.43	7.07	11	22.2	22.93	30.67	7.83333	25.2667	1.68954	1.36047e-05	0.000331955
ENSSSCG00000009396	1446.76	1246.93	1240.58	2343.59	4013.94	4063.69	36.95	21.59	26.17	54.59	67.71	75.35	28.2367	65.8833	1.22234	0.000257374	0.00308728
ENSSSCG00000009408	356.187	912.73	1096.26	1702.8	3370.12	2234.93	9.1	15.81	23.13	39.66	56.85	41.44	16.0133	45.9833	1.52184	7.39583e-05	0.00122535
ENSSSCG00000009410	313.398	567.126	596.099	1434.25	2730.34	1591.09	8	9.82	12.58	33.41	46.06	29.5	10.1333	36.3233	1.84179	2.6382e-07	1.41508e-05
ENSSSCG00000009412	7904.95	9602.54	9050.9	25840	58052.1	36308	201.91	166.29	190.94	601.9	979.31	673.27	186.38	751.493	2.01151	1.07885e-08	1.09148e-06
ENSSSCG00000009414	666.448	1922.58	2066.74	2891.79	6654.15	4585.6	17.02	33.29	43.6	67.36	112.25	85.03	31.3033	88.2133	1.49468	9.37726e-05	0.00146046
ENSSSCG00000009429	299.097	214.099	213.78	881.912	1690.97	700.267	7.64	3.71	4.51	20.54	28.53	12.99	5.28667	20.6867	1.96827	1.02814e-05	0.000266546
ENSSSCG00000009430	111.646	569.768	743.955	1786.09	4100.95	2788.37	2.85	9.87	15.69	41.6	69.18	51.71	9.47	54.1633	2.51588	6.66455e-07	2.98322e-05
ENSSSCG00000009434	420.349	768.738	766.037	1135.73	2063.45	1285.75	10.74	13.31	16.16	26.45	34.81	23.84	13.4033	28.3667	1.0816	0.00186062	0.0131063
ENSSSCG00000009435	255.59	644.843	581.502	881.456	1326.18	1017.34	6.53	11.17	12.27	20.53	22.37	18.86	9.99	20.5867	1.04315	0.00533103	0.0279559
ENSSSCG00000009440	905.343	3893.94	3838.55	5826.2	10548.1	9377.05	23.12	67.43	80.98	135.71	177.94	173.88	57.1767	162.51	1.50703	0.000450277	0.00476872
ENSSSCG00000009448	120.868	227.844	300.215	404.298	839.5	640.277	3.09	3.95	6.33	9.42	14.16	11.87	4.45667	11.8167	1.40679	0.00116709	0.00939406
ENSSSCG00000009460	287.361	738.909	825.199	1253.26	2609.91	2024.76	7.34	12.8	17.41	29.19	44.03	37.55	12.5167	36.9233	1.56068	5.00713e-05	0.000919007
ENSSSCG00000009468	5.04141	125.931	217.942	480.677	1455.01	643.16	0.13	2.18	4.6	11.2	24.55	11.93	2.30333	15.8933	2.78663	0.000437281	0.00466391
ENSSSCG00000009473	701.218	1809.76	1621.28	3751.14	7416.12	7248.24	17.91	31.34	34.2	87.38	125.11	134.41	27.8167	115.633	2.05554	9.60582e-09	9.96124e-07
ENSSSCG00000009498	57.9646	474.825	1079.63	1230.52	2469.58	2917.66	1.48	8.22	22.78	28.66	41.66	54.1	10.8267	41.4733	1.93759	0.00311083	0.0190696
ENSSSCG00000009500	224.143	233.793	161.795	91.5008	86.8725	53.1761	5.73	4.05	3.41	2.13	1.47	0.99	4.39667	1.53	-1.52288	0.00149021	0.0110977
ENSSSCG00000009509	2582.17	5586.43	5678.92	6591.71	14495.6	10057.5	65.95	96.74	119.8	153.54	244.53	186.5	94.1633	194.857	1.04918	0.00316196	0.0193069
ENSSSCG00000009523	2254.17	7262.66	3253.68	1760.2	1675.65	2880.39	57.58	125.77	68.64	41	28.27	53.41	83.9967	40.8933	-1.03847	0.00571732	0.0293796
ENSSSCG00000009528	676.92	1748.89	1916.63	2448.39	4321.35	3272.81	17.29	30.29	40.43	57.03	72.9	60.69	29.3367	63.54	1.11496	0.00188045	0.0131981
ENSSSCG00000009580	473.056	426.387	422.063	1377.04	3910.82	2417.04	12.08	7.38	8.9	32.08	65.97	44.82	9.45333	47.6233	2.33277	9.5116e-10	1.49826e-07
ENSSSCG00000009584	2153.45	3608.73	2462.38	5528.25	7116.61	5611.6	55	62.49	51.95	128.77	120.05	104.06	56.48	117.627	1.0584	0.000659483	0.00626186
ENSSSCG00000009589	865.931	786.943	795.135	3462.12	7638.74	3772.85	22.12	13.63	16.77	80.64	128.86	69.96	17.5067	93.1533	2.4117	2.6022e-11	7.66093e-09
ENSSSCG00000009611	755.876	2236.36	2373.58	2824.63	6048.66	4555.67	19.31	38.73	50.07	65.79	102.04	84.48	36.0367	84.1033	1.2227	0.00115693	0.00934255
ENSSSCG00000009612	719.316	763.912	812.28	1574.59	2570.79	1553.04	18.37	13.23	17.14	36.68	43.37	28.8	16.2467	36.2833	1.15916	0.00059506	0.00583985
ENSSSCG00000009630	1.22666	11.0826	13.0895	68.4284	72.6255	69.7117	0.03	0.19	0.28	1.59	1.23	1.29	0.166667	1.37	3.03914	4.29305e-07	2.11995e-05
ENSSSCG00000009633	563.908	2055.31	1421.58	2626.66	3207.71	4021.77	14.4	35.59	29.99	61.18	54.11	74.58	26.66	63.29	1.2473	0.00076807	0.00696637
ENSSSCG00000009650	424.144	1712.07	1458.98	1974.28	3204.43	3537.36	10.83	29.65	30.78	45.99	54.06	65.59	23.7533	55.2133	1.21689	0.00225474	0.0151583
ENSSSCG00000009653	96.9073	190.038	293.615	536.085	1371.34	1054.9	2.48	3.29	6.19	12.49	23.13	19.56	3.98667	18.3933	2.20593	1.68295e-06	6.30802e-05
ENSSSCG00000009659	13.1089	33.9857	35.8226	95.13	336.595	186.522	0.33	0.59	0.76	2.22	5.68	3.46	0.56	3.78667	2.75743	4.13691e-07	2.05919e-05
ENSSSCG00000009664	2947.3	3463.06	2590.58	5403.4	9709.97	6543.33	75.28	59.97	54.65	125.86	163.8	121.34	63.3	137	1.1139	0.000735322	0.00677302
ENSSSCG00000009668	17246.5	12319.9	8080.5	29100.2	57516	30806.9	440.51	213.35	170.47	677.84	970.27	571.27	274.777	739.793	1.42886	0.0005673	0.00562957
ENSSSCG00000009670	120.127	358.077	463.812	555.902	1330.27	854.632	3.07	6.2	9.78	12.95	22.44	15.85	6.35	17.08	1.42748	0.0021041	0.0143944
ENSSSCG00000009671	486.731	1276.86	1436.91	1601.32	3205.28	2396.02	12.43	22.11	30.31	37.3	54.07	44.43	21.6167	45.2667	1.0663	0.00395665	0.0226167
ENSSSCG00000009673	408.294	942.732	410.157	3727.33	10079	7858.33	10.43	16.33	8.65	86.82	170.03	145.72	11.8033	134.19	3.50701	1.69627e-18	3.51807e-15
ENSSSCG00000009683	14.0663	243.441	257.645	497.805	999.479	1104.86	0.36	4.22	5.44	11.6	16.86	20.49	3.34	16.3167	2.28843	0.000735959	0.00677387
ENSSSCG00000009704	4511.39	9660.38	11922.2	15943.9	30558.1	21280.1	115.23	167.29	251.52	371.39	515.5	394.61	178.013	427.167	1.26281	0.000668266	0.0063133
ENSSSCG00000009705	827.824	2926.55	2550.7	3347.96	5764.36	4264.7	21.14	50.68	53.81	77.98	97.24	79.08	41.8767	84.7667	1.01735	0.00608379	0.0305885
ENSSSCG00000009714	296.769	854.122	703.545	1077.34	2220.54	1378.94	7.58	14.79	14.84	25.09	37.46	25.57	12.4033	29.3733	1.24378	0.00101976	0.00856267
ENSSSCG00000009766	919.691	1435.73	1375.22	2132.94	3486.37	2833.9	23.49	24.86	29.01	49.68	58.81	52.55	25.7867	53.68	1.05776	0.000623904	0.00601982
ENSSSCG00000009776	612.802	1344.53	1563.65	2426.65	4606.4	4119.47	15.65	23.28	32.99	56.52	77.71	76.39	23.9733	70.2067	1.55018	1.33126e-05	0.000328042
ENSSSCG00000009779	319.177	687.579	796.941	1351.96	2849.31	2312.89	8.15	11.91	16.81	31.49	48.07	42.89	12.29	40.8167	1.73167	3.20191e-06	0.000102198
ENSSSCG00000009781	749.5	1553.22	1087.81	2078.74	3865.45	2271.9	19.14	26.9	22.95	48.42	65.21	42.13	22.9967	51.92	1.17487	0.000352668	0.00401519
ENSSSCG00000009787	129.261	449.363	302.91	1332.96	2303.66	1834.54	3.3	7.78	6.39	31.05	38.86	34.02	5.82333	34.6433	2.57266	9.85618e-11	2.23e-08
ENSSSCG00000009793	299.487	1155.09	1130.61	1619.94	2527.75	2434.11	7.65	20	23.85	37.73	42.64	45.14	17.1667	41.8367	1.28516	0.00148628	0.0110872
ENSSSCG00000009801	312.345	654.302	811.767	1694.49	4662.81	2647.17	7.98	11.33	17.13	39.47	78.66	49.09	12.1467	55.74	2.19815	2.72101e-08	2.2424e-06
ENSSSCG00000009827	1265.2	826.455	1002.97	2555.72	5508.27	2934.37	32.32	14.31	21.16	59.53	92.92	54.41	22.5967	68.9533	1.60951	2.20854e-05	0.000481314
ENSSSCG00000009833	569.532	1356.98	1300.33	1997.71	2729.19	2576.43	14.55	23.5	27.43	46.53	46.04	47.78	21.8267	46.7833	1.0999	0.00109641	0.00903562
ENSSSCG00000009839	200.21	609.24	752.906	1196.28	2253.83	1731.63	5.11	10.55	15.88	27.87	38.02	32.11	10.5133	32.6667	1.6356	8.75549e-05	0.00138794
ENSSSCG00000009844	705.231	1771.74	1694.43	427.352	704.82	557.466	18.01	30.68	35.75	9.95	11.89	10.34	28.1467	10.7267	-1.39176	0.000142082	0.00197992
ENSSSCG00000009849	879.279	1933.26	1952.77	2664.17	4183.8	3795.15	22.46	33.48	41.2	62.06	70.58	70.38	32.38	67.6733	1.06348	0.00124759	0.00986424
ENSSSCG00000009854	190.419	974.427	1151.61	1398.82	2745.54	1753.72	4.86	16.87	24.29	32.58	46.32	32.52	15.34	37.14	1.27568	0.00746735	0.0353591
ENSSSCG00000009864	312.146	1027.32	1012.5	2146.88	4074.89	4005.25	7.97	17.79	21.36	50.01	68.74	74.27	15.7067	64.34	2.03434	2.58974e-07	1.39603e-05
ENSSSCG00000009870	7447.81	8044.44	5035.87	2380.27	2047.64	2825.53	190.23	139.31	106.24	55.44	34.54	52.39	145.26	47.4567	-1.61395	6.15051e-06	0.00017316
ENSSSCG00000009874	664.151	246.098	232.671	928.615	1822.99	1158.51	16.96	4.26	4.91	21.63	30.75	21.48	8.71	24.62	1.49909	0.00278877	0.0176698
ENSSSCG00000009885	590.471	1648.44	1352.64	2461.82	4022.89	3175.67	15.08	28.55	28.54	57.34	67.86	58.89	24.0567	61.3633	1.35094	9.63495e-05	0.00148756
ENSSSCG00000009887	308.489	1004.95	1126.14	1321.46	2592.26	2073.05	7.88	17.4	23.76	30.78	43.73	38.44	16.3467	37.65	1.20365	0.00292903	0.0182885
ENSSSCG00000009896	146.117	201.091	179.142	553.32	772.902	634.186	3.73	3.48	3.78	12.89	13.04	11.76	3.66333	12.5633	1.77799	6.05514e-06	0.00017154
ENSSSCG00000009898	2403.32	3998.28	3827.33	5846.51	10926.9	8497.28	61.39	69.24	80.74	136.18	184.33	157.57	70.4567	159.36	1.17748	0.00032617	0.00377569
ENSSSCG00000009925	1365.16	2238.82	2173.22	3907.29	7683.33	5143.54	34.87	38.77	45.85	91.01	129.61	95.38	39.83	105.333	1.40303	1.25804e-05	0.000314991
ENSSSCG00000009943	31.408	272.727	294.022	1184.63	2461.88	2297.85	0.8	4.72	6.2	27.59	41.53	42.61	3.90667	37.2433	3.25297	1.8005e-08	1.58904e-06
ENSSSCG00000010015	21.0634	22.4418	26.957	93.0457	132.463	147.92	0.54	0.39	0.57	2.17	2.23	2.74	0.5	2.38	2.25096	2.6169e-06	8.87321e-05
ENSSSCG00000010017	7295.91	9417.4	7782.33	2522.77	2598.3	2220.44	186.35	163.08	164.18	58.76	43.83	41.17	171.203	47.92	-1.83701	3.91216e-08	3.00512e-06
ENSSSCG00000010033	620.202	1440.16	1394.38	2098.53	3446.86	2792.73	15.84	24.94	29.42	48.88	58.15	51.79	23.4	52.94	1.17785	0.000464255	0.00487116
ENSSSCG00000010067	19685.5	14179.9	10635.3	6788.43	9683.39	6834.53	502.81	245.56	224.37	158.12	163.35	126.74	324.247	149.403	-1.11788	0.0031955	0.0194544
ENSSSCG00000010073	13187.6	13735.5	10491.8	5421.06	6967.5	5566.37	336.84	237.86	221.34	126.27	117.54	103.22	265.347	115.677	-1.19778	0.000363832	0.00411593
ENSSSCG00000010076	330.29	65.4412	203.444	923.181	3188.9	1779.49	8.44	1.13	4.29	21.5	53.8	33	4.62	36.1	2.96603	6.41505e-07	2.90287e-05
ENSSSCG00000010099	263.397	184.23	267.088	651.868	1411.6	613.266	6.73	3.19	5.63	15.18	23.81	11.37	5.18333	16.7867	1.69536	0.000139833	0.00195296
ENSSSCG00000010104	3072.49	1900.41	1653.59	1033.33	1486.32	842.625	78.48	32.91	34.88	24.07	25.07	15.63	48.7567	21.59	-1.17524	0.00289877	0.0181633
ENSSSCG00000010116	6804.53	10165.8	6550.04	3485.48	4066.41	3902.86	173.8	176.04	138.18	81.19	68.6	72.37	162.673	74.0533	-1.13534	0.000428865	0.0046166
ENSSSCG00000010143	273.757	576.432	446.184	787.763	1358.95	919.375	6.99	9.98	9.41	18.35	22.92	17.05	8.79333	19.44	1.14455	0.00181577	0.0128896
ENSSSCG00000010144	214.969	573.602	645.536	149.748	205.754	222.104	5.49	9.93	13.62	3.49	3.47	4.12	9.68	3.69333	-1.39008	0.00212104	0.0144864
ENSSSCG00000010145	704.743	1420.6	1556.25	2315.33	4305.02	2919.76	18	24.6	32.83	53.93	72.62	54.14	25.1433	60.23	1.26031	0.000228284	0.00281542
ENSSSCG00000010151	105.167	643.798	609.579	1605.04	3834	2717.3	2.69	11.15	12.86	37.39	64.68	50.39	8.9	50.82	2.51352	4.49227e-07	2.19322e-05
ENSSSCG00000010170	30.5607	109.445	99.8103	184.89	377.018	277.977	0.78	1.9	2.11	4.31	6.36	5.15	1.59667	5.27333	1.72365	0.000496603	0.00510722
ENSSSCG00000010184	752.101	3462.36	1525.24	837.14	645.609	958.765	19.21	59.96	32.18	19.5	10.89	17.78	37.1167	16.0567	-1.20889	0.00476618	0.0258301
ENSSSCG00000010186	176.22	645.327	822.429	960.344	1761.07	1261.09	4.5	11.18	17.35	22.37	29.71	23.38	11.01	25.1533	1.19194	0.00776545	0.0362575
ENSSSCG00000010188	2456.65	7413.46	3235.3	8981.52	10241.8	12954.3	62.75	128.38	68.25	209.21	172.77	240.22	86.46	207.4	1.26231	0.000627509	0.00603456
ENSSSCG00000010189	428.759	1261.68	1321.47	1403.39	3078.33	2071.85	10.95	21.85	27.88	32.69	51.93	38.42	20.2267	41.0133	1.01983	0.00816173	0.0375748
ENSSSCG00000010204	14.0703	91.0838	114.853	153.773	323.632	186.26	0.36	1.58	2.42	3.58	5.46	3.45	1.45333	4.16333	1.51837	0.0101652	0.044541
ENSSSCG00000010219	470.072	1291.39	1033.58	1657.04	2553.11	2213.3	12.01	22.36	21.8	38.6	43.07	41.04	18.7233	40.9033	1.12738	0.00108925	0.00900042
ENSSSCG00000010224	54.4326	78.9561	69.6599	181.377	247.14	231.771	1.39	1.37	1.47	4.22	4.17	4.3	1.41	4.23	1.58496	0.00024527	0.0029806
ENSSSCG00000010226	880.185	3070.63	2675.8	4742.59	7370.32	8370.02	22.48	53.17	56.45	110.47	124.33	155.21	44.0333	130.003	1.56188	4.81725e-05	0.000893381
ENSSSCG00000010243	833.576	2406.56	2526.04	3500.42	5440.75	5487.43	21.29	41.67	53.29	81.54	91.78	101.76	38.75	91.6933	1.24262	0.000624234	0.00601982
ENSSSCG00000010247	1451.15	4817.15	4839.93	6527.86	13311.9	11418.1	37.07	83.42	102.1	152.06	224.56	211.73	74.1967	196.117	1.40229	0.00045086	0.00477084
ENSSSCG00000010258	2138.37	2879.02	2100.6	1141.23	1057.15	1189.62	54.62	49.86	44.31	26.58	17.83	22.06	49.5967	22.1567	-1.1625	0.000277543	0.00329241
ENSSSCG00000010276	45.5045	202.229	148.329	427.958	591.562	641.16	1.16	3.5	3.13	9.97	9.98	11.89	2.59667	10.6133	2.03115	2.85459e-05	0.000597017
ENSSSCG00000010302	225.934	747.895	502.171	897.18	1289.49	954.875	5.77	12.95	10.59	20.9	21.75	17.71	9.77	20.12	1.0422	0.0079103	0.0367572
ENSSSCG00000010316	261.826	783.812	788.064	1004.5	1733.54	1440.75	6.69	13.57	16.63	23.4	29.24	26.72	12.2967	26.4533	1.10518	0.00434002	0.0241104
ENSSSCG00000010329	1516.68	3835.34	3039.64	5709.55	8478.21	5878.41	38.74	66.42	64.13	132.99	143.02	109.01	56.43	128.34	1.18544	0.000532713	0.00533743
ENSSSCG00000010334	2578.97	13624.1	5577.43	2269.67	2186.49	2171.1	65.87	235.93	117.66	52.87	36.89	40.26	139.82	43.34	-1.6898	9.59885e-05	0.00148752
ENSSSCG00000010357	1322.62	2784	2723.46	3954.49	8125.51	6185.48	33.78	48.21	57.46	92.11	137.07	114.7	46.4833	114.627	1.30216	0.000117181	0.00171473
ENSSSCG00000010391	113.379	209.358	269.815	554.666	1083.14	787.746	2.9	3.63	5.69	12.92	18.27	14.61	4.07333	15.2667	1.9061	6.19652e-06	0.000174062
ENSSSCG00000010416	945.301	877.071	916.095	419.665	512.972	454.124	24.15	15.19	19.33	9.78	8.65	8.42	19.5567	8.95	-1.1277	0.00208326	0.0142754
ENSSSCG00000010429	14.8771	74.5728	108.663	156.816	354.876	240.255	0.38	1.29	2.29	3.65	5.99	4.46	1.32	4.7	1.83212	0.00162844	0.0118852
ENSSSCG00000010440	515.98	2386.92	2656.9	4263.44	8141.36	8369.69	13.18	41.33	56.05	99.31	137.34	155.2	36.8533	130.617	1.82547	6.25052e-05	0.00107493
ENSSSCG00000010444	21.9347	23.7833	0	83.6891	117.069	60.2571	0.56	0.41	0	1.95	1.97	1.12	0.323333	1.68	2.37737	0.00141883	0.0107462
ENSSSCG00000010446	362.166	480.453	758.311	821.047	1742.37	1249.87	9.25	8.32	16	19.12	29.39	23.18	11.19	23.8967	1.0946	0.00444784	0.0245559
ENSSSCG00000010447	7029.15	17006.9	13224.1	6036.22	6728.19	4436.43	179.54	294.51	278.98	140.6	113.5	82.27	251.01	112.123	-1.16266	0.00113424	0.00926091
ENSSSCG00000010448	144.105	464.779	698.254	1082.2	2330.11	1908.97	3.68	8.05	14.73	25.21	39.31	35.4	8.82	33.3067	1.91696	3.3573e-05	0.000681538
ENSSSCG00000010451	449.471	1046.24	1606.84	1170.74	2455.87	11754.7	11.48	18.12	33.9	27.27	41.43	217.97	21.1667	95.5567	2.17456	0.000764105	0.00694053
ENSSSCG00000010452	1461.9	2113.76	3540.97	2241.41	4767.72	29660.3	37.34	36.6	74.7	52.21	80.43	550	49.5467	227.547	2.1993	0.00146845	0.0109969
ENSSSCG00000010454	314.337	624.696	1508.85	712.477	1736.42	6586.25	8.03	10.82	31.83	16.6	29.29	122.13	16.8933	56.0067	1.72914	0.00807362	0.0372933
ENSSSCG00000010457	334.526	711.244	1008.39	1580.26	2861	2117.08	8.54	12.32	21.27	36.81	48.26	39.26	14.0433	41.4433	1.56125	4.60298e-05	0.000866559
ENSSSCG00000010464	111.055	201.056	181.146	338.88	286.237	617.182	2.84	3.48	3.82	7.89	4.83	11.44	3.38	8.05333	1.25256	0.00604294	0.0304941
ENSSSCG00000010465	617.418	2771.55	2646.27	3817.07	6072.68	6719.75	15.77	48	55.83	88.91	102.44	124.61	39.8667	105.32	1.40152	0.000917284	0.00798229
ENSSSCG00000010467	349.004	1349.69	1353.44	2427.67	4335.81	4111.94	8.91	23.37	28.55	56.55	73.14	76.25	20.2767	68.6467	1.75937	1.74008e-05	0.000403233
ENSSSCG00000010471	365.944	1086.3	1622.63	2725.07	6077.54	4648.7	9.35	18.81	34.23	63.48	102.53	86.2	20.7967	84.07	2.01524	3.45353e-06	0.000109353
ENSSSCG00000010477	199.487	315.975	461.909	699.314	1376.31	901.556	5.1	5.47	9.74	16.29	23.22	16.72	6.77	18.7433	1.46915	0.000329903	0.00381534
ENSSSCG00000010483	86.3962	149.314	169.756	314.232	770.762	762.613	2.21	2.59	3.58	7.32	13	14.14	2.79333	11.4867	2.0399	6.7495e-06	0.00018541
ENSSSCG00000010484	257.406	571.149	755.36	954.447	1506.13	1314.29	6.57	9.89	15.94	22.23	25.41	24.37	10.8	24.0033	1.1522	0.00326487	0.0197703
ENSSSCG00000010486	415.871	834.729	1134.52	2282.95	3716.9	3903.34	10.62	14.46	23.93	53.18	62.7	72.38	16.3367	62.7533	1.94158	1.35685e-07	7.96036e-06
ENSSSCG00000010497	249.68	486.66	666.245	1018.41	1806.31	1641.41	6.38	8.43	14.06	23.72	30.47	30.44	9.62333	28.21	1.5516	5.45199e-05	0.000969208
ENSSSCG00000010509	265.62	486.816	885.881	2812.15	8970.07	6639.09	6.78	8.43	18.69	65.5	151.32	123.11	11.3	113.31	3.32588	5.02381e-13	2.15573e-10
ENSSSCG00000010581	1094	1593.41	1381.02	331.456	396.251	388.286	27.94	27.59	29.13	7.72	6.68	7.2	28.22	7.2	-1.97065	1.072e-08	1.09148e-06
ENSSSCG00000010586	26.728	182.121	149.953	286.267	490.083	396.831	0.68	3.15	3.16	6.67	8.27	7.36	2.33	7.43333	1.67368	0.00228043	0.0152979
ENSSSCG00000010604	90.1347	448.651	443.933	694.617	1146.28	1167.42	2.3	7.77	9.37	16.18	19.34	21.65	6.48	19.0567	1.55623	0.00129895	0.0101216
ENSSSCG00000010606	49.8576	620.893	698.192	1159.61	2087.17	2049.78	1.27	10.75	14.73	27.01	35.21	38.01	8.91667	33.41	1.9057	0.0015928	0.011673
ENSSSCG00000010610	53.3928	153.289	67.1917	15.1511	5.16939	15.5058	1.36	2.65	1.42	0.35	0.09	0.29	1.81	0.243333	-2.89498	1.04267e-06	4.31062e-05
ENSSSCG00000010613	551.771	735.771	869.958	1651.25	2753.72	1540.17	14.09	12.74	18.35	38.46	46.45	28.56	15.06	37.8233	1.32855	0.000124781	0.00180556
ENSSSCG00000010625	1242.1	3902.95	4696.43	5144.23	9649.91	7034.88	31.73	67.59	99.08	119.83	162.79	130.45	66.1333	137.69	1.05797	0.00899515	0.040527
ENSSSCG00000010629	18.8573	303.286	205.611	915.985	1497.42	807.257	0.48	5.25	4.34	21.34	25.26	14.97	3.35667	20.5233	2.61216	4.419e-05	0.000839543
ENSSSCG00000010644	110.368	287.529	310.641	417.962	726.554	639.708	2.82	4.98	6.55	9.74	12.26	11.86	4.78333	11.2867	1.23853	0.00440974	0.0244003
ENSSSCG00000010645	102.5	173.528	194.202	334.648	602.971	651.635	2.62	3.01	4.1	7.8	10.17	12.08	3.24333	10.0167	1.62685	0.000143168	0.0019902
ENSSSCG00000010648	286.076	1659.71	1734.8	2667.46	3801.16	5021.44	7.31	28.74	36.6	62.13	64.12	93.11	24.2167	73.12	1.59427	0.000818763	0.00730896
ENSSSCG00000010651	2130.12	5636.73	3566.61	10403.3	19611.1	15181.4	54.41	97.61	75.24	242.33	330.83	281.51	75.7533	284.89	1.91102	7.38398e-08	5.04869e-06
ENSSSCG00000010652	49.3517	165.956	235.784	716.515	1675.17	1503.78	1.26	2.87	4.97	16.69	28.26	27.89	3.03333	24.28	3.00079	3.23823e-09	4.15428e-07
ENSSSCG00000010669	339.062	1002.14	1098.01	1376.72	2574.4	2102.44	8.66	17.35	23.16	32.07	43.43	38.99	16.39	38.1633	1.21937	0.00163332	0.0119068
ENSSSCG00000010690	742.712	1836.31	1740.83	2206.02	4208.38	3143.64	18.97	31.8	36.73	51.39	70.99	58.29	29.1667	60.2233	1.046	0.00230231	0.0154281
ENSSSCG00000010726	461.289	2843.77	3665.27	5945	14599.9	8193.44	11.78	49.25	77.32	138.48	246.29	151.93	46.1167	178.9	1.95579	0.000239212	0.002927
ENSSSCG00000010728	1283.61	2069.74	1601.89	466.976	940.926	604.493	32.79	35.84	33.79	10.88	15.87	11.21	34.14	12.6533	-1.43195	2.06255e-05	0.000452669
ENSSSCG00000010753	10827.3	9821.74	3968.61	3994.38	3719.01	4327.01	276.56	170.08	83.72	93.04	62.74	80.24	176.787	78.6733	-1.16806	0.00519493	0.0274504
ENSSSCG00000010755	551.93	1219.11	1188.39	1722.73	3003.25	1810.2	14.1	21.11	25.07	40.13	50.66	33.57	20.0933	41.4533	1.04477	0.00257827	0.0166325
ENSSSCG00000010792	61003.8	47774.7	21154.1	17853.8	11278.8	25636.1	1558.18	827.32	446.27	415.87	190.27	475.38	943.923	360.507	-1.38864	0.00342871	0.0204211
ENSSSCG00000010794	147.793	410.704	484.364	624.348	1112.41	943.724	3.77	7.11	10.22	14.54	18.77	17.5	7.03333	16.9367	1.26787	0.00318128	0.0194058
ENSSSCG00000010801	559.386	1378.04	1447.87	1757.2	3111.86	2467.34	14.29	23.86	30.54	40.93	52.5	45.75	22.8967	46.3933	1.01878	0.00373566	0.0217187
ENSSSCG00000010853	25460.1	41845.7	57233.5	7597.68	2995.74	14998.7	650.31	724.65	1207.42	176.97	50.54	278.13	860.793	168.547	-2.35252	6.80047e-06	0.000185989
ENSSSCG00000010862	700.381	1898.2	1767.26	2623.4	4295.49	4076.06	17.89	32.87	37.28	61.11	72.46	75.58	29.3467	69.7167	1.24831	0.000325354	0.00376974
ENSSSCG00000010863	561.354	1683	1966.22	2508.9	4791.09	4144.5	14.34	29.14	41.48	58.44	80.82	76.85	28.32	72.0367	1.34691	0.000502917	0.0051402
ENSSSCG00000010865	147.165	198.552	420.562	992.463	2193.51	1598.02	3.76	3.44	8.87	23.12	37	29.63	5.35667	29.9167	2.48154	2.59873e-08	2.15591e-06
ENSSSCG00000010896	211.597	569.345	628.859	1324.91	2587.28	2165.83	5.4	9.86	13.27	30.86	43.65	40.16	9.51	38.2233	2.00694	3.0424e-07	1.58129e-05
ENSSSCG00000010900	156.282	447.901	428.528	710.11	1617.37	1462.68	3.99	7.76	9.04	16.54	27.28	27.12	6.93	23.6467	1.77071	2.1937e-05	0.00047892
ENSSSCG00000010908	3063.92	5632.58	6411.25	17686.2	37263.7	24757.7	78.26	97.54	135.25	411.97	628.62	459.09	103.683	499.893	2.26944	6.16414e-10	1.06103e-07
ENSSSCG00000010911	3.02716	194.999	280.663	508.37	1174.87	1153.29	0.08	3.38	5.92	11.84	19.82	21.39	3.12667	17.6833	2.49969	0.00283145	0.0178856
ENSSSCG00000010912	8.09971	146.259	214.054	672.48	1176.22	928.69	0.21	2.53	4.52	15.66	19.84	17.22	2.42	17.5733	2.86031	5.72544e-05	0.0010106
ENSSSCG00000010923	405.54	759.798	745.086	1163.48	2169.04	1642.53	10.36	13.16	15.72	27.1	36.59	30.46	13.08	31.3833	1.26264	0.00021897	0.00272759
ENSSSCG00000010941	482.491	1112.48	1053.74	1255.36	2426.45	2132.93	12.32	19.26	22.23	29.24	40.93	39.55	17.9367	36.5733	1.02788	0.00325733	0.0197439
ENSSSCG00000010952	1229.07	2322.37	1919.61	3230.76	4921.33	5890.38	31.39	40.22	40.5	75.26	83.02	109.23	37.37	89.17	1.25468	7.29067e-05	0.00121453
ENSSSCG00000010959	5.48232	7.441	11.2505	30.6929	95.5993	38.5393	0.14	0.13	0.24	0.71	1.61	0.71	0.17	1.01	2.57075	1.38719e-05	0.000336495
ENSSSCG00000010969	2921.2	2874.47	2539.47	1486.9	1488.57	1519.72	74.61	49.78	53.57	34.63	25.11	28.18	59.32	29.3067	-1.01729	0.00171028	0.0123306
ENSSSCG00000010984	77.0994	173.472	215.102	289.132	554.164	399.336	1.97	3	4.54	6.73	9.35	7.41	3.17	7.83	1.30453	0.00417812	0.023526
ENSSSCG00000011003	9305.35	6034.46	5126.69	3154.97	3944.53	3561.01	237.68	104.5	108.15	73.49	66.54	66.03	150.11	68.6867	-1.12792	0.00310053	0.0190439
ENSSSCG00000011025	12.0284	253.016	295.047	624.182	1215.16	1164.01	0.31	4.38	6.22	14.54	20.5	21.58	3.63667	18.8733	2.37566	0.000718624	0.00666361
ENSSSCG00000011030	575.978	18.6167	7.03592	2684.54	13961.1	221.139	14.71	0.32	0.15	62.53	235.52	4.1	5.06	100.717	4.31502	0.00200212	0.0138798
ENSSSCG00000011049	64.4177	179.414	327.698	454.128	706.125	817.958	1.65	3.11	6.91	10.58	11.91	15.17	3.89	12.5533	1.69023	0.00100614	0.0085063
ENSSSCG00000011065	84.7254	185.988	205.039	314.56	781.836	562.63	2.16	3.22	4.33	7.33	13.19	10.43	3.23667	10.3167	1.6724	0.00022465	0.00277888
ENSSSCG00000011079	2347.1	2740.25	2411.68	4930.49	10605.6	5751.47	59.95	47.45	50.88	114.85	178.91	106.65	52.76	133.47	1.339	8.78217e-05	0.0013893
ENSSSCG00000011085	266.746	1149.65	964.664	1467.17	2153.56	1998.34	6.81	19.91	20.35	34.18	36.33	37.06	15.69	35.8567	1.1924	0.00360837	0.0211904
ENSSSCG00000011111	38.5737	23.8678	37.8295	171.2	415.574	311.52	0.99	0.41	0.8	3.99	7.01	5.78	0.733333	5.59333	2.93117	1.22455e-08	1.19049e-06
ENSSSCG00000011114	382.999	786.923	625.377	288.335	308.589	319.474	9.78	13.63	13.19	6.72	5.21	5.92	12.2	5.95	-1.03592	0.007624	0.035788
ENSSSCG00000011117	69.5842	942.224	984.176	1721.13	3068.55	3090.84	1.78	16.32	20.76	40.09	51.76	57.31	12.9533	49.72	1.9405	0.00127908	0.0100296
ENSSSCG00000011120	233.289	768.659	766.128	1749.94	3897.5	2969.26	5.96	13.31	16.16	40.76	65.75	55.06	11.81	53.8567	2.18912	6.33573e-08	4.50525e-06
ENSSSCG00000011121	384.541	732.018	872.63	2316.55	5422.37	3337.6	9.82	12.68	18.41	53.96	91.47	61.89	13.6367	69.1067	2.34133	2.44443e-10	4.82834e-08
ENSSSCG00000011131	299.43	465.798	473.084	1196.88	2131.88	1691	7.65	8.07	9.98	27.88	35.96	31.36	8.56667	31.7333	1.88919	3.97514e-08	3.03477e-06
ENSSSCG00000011136	348.886	1245	1345.47	2127.08	2435.18	2472.24	8.91	21.56	28.38	49.55	41.08	45.84	19.6167	45.49	1.21347	0.00250292	0.0163412
ENSSSCG00000011147	1346.44	6213.15	6344.73	616.9	193.894	717.921	34.39	107.59	133.85	14.37	3.27	13.31	91.9433	10.3167	-3.15577	3.71185e-08	2.90505e-06
ENSSSCG00000011160	7.12375	28.2257	11.0314	34.9778	105.004	54.3584	0.18	0.49	0.23	0.81	1.77	1.01	0.3	1.19667	1.99599	0.00045389	0.00479474
ENSSSCG00000011171	4266.47	10871.7	9901.63	2381.34	2524.42	2890.12	108.98	188.27	208.89	55.47	42.59	53.59	168.713	50.55	-1.73879	1.32982e-06	5.15523e-05
ENSSSCG00000011198	1348.4	2503.21	2395.28	4648.55	10462.8	5758.93	34.44	43.35	50.53	108.28	176.5	106.79	42.7733	130.523	1.60952	3.26278e-06	0.000103842
ENSSSCG00000011199	314.858	1290.65	1031.76	1309.38	2548.4	1848.86	8.04	22.35	21.77	30.5	42.99	34.28	17.3867	35.9233	1.04694	0.00964946	0.0427171
ENSSSCG00000011201	312.005	524.662	494.44	1298.82	2242.93	1078.96	7.97	9.09	10.43	30.25	37.84	20.01	9.16333	29.3667	1.68024	5.14388e-06	0.000150259
ENSSSCG00000011207	177.508	405.06	481.96	696.599	1389.85	969.647	4.53	7.01	10.17	16.23	23.45	17.98	7.23667	19.22	1.40921	0.000607121	0.00591159
ENSSSCG00000011218	697.752	1642.9	1279.94	2640.61	3327.88	2943.99	17.82	28.45	27	61.51	56.14	54.59	24.4233	57.4133	1.23313	0.000147884	0.00204248
ENSSSCG00000011230	74.4847	313.613	260.989	360.885	959.808	617.851	1.9	5.43	5.51	8.41	16.19	11.46	4.28	12.02	1.48975	0.0023198	0.0154794
ENSSSCG00000011236	833.21	1955.29	1553.79	2394.25	4558.49	3255.28	21.28	33.86	32.78	55.77	76.9	60.36	29.3067	64.3433	1.13456	0.000602184	0.00587429
ENSSSCG00000011239	918.655	2419.05	2278.61	3369.99	5520.44	12038	23.46	41.89	48.07	78.5	93.13	223.23	37.8067	131.62	1.79967	4.12372e-05	0.000796826
ENSSSCG00000011246	373.76	653.408	907.428	247.777	410.665	301.544	9.55	11.32	19.14	5.77	6.93	5.59	13.3367	6.09667	-1.12931	0.00620122	0.030929
ENSSSCG00000011277	2039.48	1816.51	2301.81	779.623	1134.74	1015.49	52.09	31.46	48.56	18.16	19.14	18.83	44.0367	18.71	-1.2349	0.000204296	0.00259415
ENSSSCG00000011284	668.093	2001.68	1836.16	3481.43	3822.86	5518.19	17.06	34.66	38.74	81.09	64.49	102.33	30.1533	82.6367	1.45446	8.05181e-05	0.00130295
ENSSSCG00000011292	15.5448	68.0216	70.8016	110.158	227.587	217.815	0.4	1.18	1.49	2.57	3.84	4.04	1.02333	3.48333	1.76719	0.000927827	0.00804591
ENSSSCG00000011299	3615.23	4282.14	4245.6	1849.4	1965.76	2051.66	92.34	74.15	89.57	43.08	33.16	38.04	85.3533	38.0933	-1.16391	0.0001433	0.0019902
ENSSSCG00000011309	228.905	825.64	1136.79	1326.6	2646.75	2214.18	5.85	14.3	23.98	30.9	44.65	41.06	14.71	38.87	1.40186	0.0017575	0.0125836
ENSSSCG00000011316	809.107	1032.33	943.782	2059.75	3975.28	2612.16	20.67	17.88	19.91	47.98	67.06	48.44	19.4867	54.4933	1.48359	3.74974e-06	0.000116654
ENSSSCG00000011317	550.91	2413.17	1799.86	2493.48	3935.23	3990.19	14.07	41.79	37.97	58.08	66.39	73.99	31.2767	66.1533	1.08073	0.00601879	0.0304499
ENSSSCG00000011322	142.192	256.917	367.225	610.929	789.069	568.486	3.63	4.45	7.75	14.23	13.31	10.54	5.27667	12.6933	1.26637	0.00294175	0.0183403
ENSSSCG00000011330	36.6338	366.236	743.241	1941.11	4092.79	3162.17	0.94	6.34	15.68	45.21	69.04	58.64	7.65333	57.63	2.91266	1.38072e-05	0.000335579
ENSSSCG00000011332	1192.71	3254.35	3017.62	4134.39	7889.13	7012.06	30.46	56.36	63.66	96.3	133.09	130.03	50.16	119.807	1.2561	0.000433827	0.00464191
ENSSSCG00000011340	837.71	3299.61	3380.98	4156.81	9578.46	6146.06	21.4	57.14	71.33	96.83	161.58	113.97	49.9567	124.127	1.31306	0.00191941	0.0134035
ENSSSCG00000011363	18.9501	772.566	920.454	1378.7	2910.37	2897.32	0.48	13.38	19.42	32.11	49.1	53.73	11.0933	44.98	2.01959	0.00807184	0.0372933
ENSSSCG00000011399	4131.99	9245.13	7961.11	13084.3	24098.9	12887.9	105.54	160.1	167.95	304.78	406.54	238.99	144.53	316.77	1.13207	0.00138384	0.0105583
ENSSSCG00000011417	900.745	1730.12	1643.03	2172.41	3942.36	3229.79	23.01	29.96	34.66	50.6	66.51	59.89	29.21	59	1.01425	0.00155783	0.011498
ENSSSCG00000011420	224.39	1093.36	1234.72	1500	2511.61	1932.65	5.73	18.93	26.05	34.94	42.37	35.84	16.9033	37.7167	1.15789	0.0109914	0.0471535
ENSSSCG00000011425	0	8.5928	19.9163	227.376	739.184	709.707	0	0.15	0.42	5.3	12.47	13.16	0.19	10.31	5.7619	3.71443e-13	1.70305e-10
ENSSSCG00000011432	2932.94	3688.96	2697.05	1351.45	803.753	2101.64	74.91	63.88	56.9	31.48	13.56	38.97	65.23	28.0033	-1.21994	0.0016268	0.0118852
ENSSSCG00000011434	534.054	1169.26	1144.01	1874.79	2693.76	1550.47	13.64	20.25	24.13	43.67	45.44	28.75	19.34	39.2867	1.02245	0.00371242	0.0216768
ENSSSCG00000011436	236.606	201.122	201.181	411.669	688.864	423.986	6.04	3.48	4.24	9.59	11.62	7.86	4.58667	9.69	1.07905	0.0110823	0.047391
ENSSSCG00000011439	5.22117	37.3627	34.5827	87.3654	149.675	129.019	0.13	0.65	0.73	2.04	2.52	2.39	0.503333	2.31667	2.20246	0.000105056	0.0015808
ENSSSCG00000011444	293.632	470.088	399.533	618.33	1425.75	759.129	7.5	8.14	8.43	14.4	24.05	14.08	8.02333	17.51	1.12591	0.00360578	0.0211852
ENSSSCG00000011453	1541.04	1563.64	1260.79	587.904	799.524	508.914	39.36	27.08	26.6	13.69	13.49	9.44	31.0133	12.2067	-1.34522	0.000131735	0.00187564
ENSSSCG00000011465	61.5918	446.757	631.849	648.786	1228.93	1551.36	1.57	7.74	13.33	15.11	20.73	28.77	7.54667	21.5367	1.51288	0.0088733	0.0401088
ENSSSCG00000011474	698.098	1746.41	1780.97	2292.99	4537.18	3816.8	17.83	30.24	37.57	53.41	76.54	70.78	28.5467	66.91	1.2289	0.000524665	0.00528659
ENSSSCG00000011493	479.538	1217.9	1076.22	1863.48	2504.23	2671.21	12.25	21.09	22.7	43.41	42.25	49.53	18.68	45.0633	1.27046	0.000217608	0.00271335
ENSSSCG00000011500	446.278	420.153	515.848	1054.54	1702.67	1360.46	11.4	7.28	10.88	24.56	28.72	25.23	9.85333	26.17	1.40923	6.71432e-05	0.00113717
ENSSSCG00000011504	308.408	395.039	450.432	826.275	1213.02	1008.04	7.88	6.84	9.5	19.25	20.46	18.69	8.07333	19.4667	1.26977	0.000445506	0.00472221
ENSSSCG00000011511	274.475	735.172	675.377	944.576	1715	1508.14	7.01	12.73	14.25	22	28.93	27.97	11.33	26.3	1.21491	0.0011485	0.00931072
ENSSSCG00000011540	75.1605	1261.28	1503.44	2412.24	3702.29	3446.23	1.92	21.84	31.72	56.19	62.46	63.9	18.4933	60.85	1.71825	0.00692426	0.0335214
ENSSSCG00000011548	522.406	1505.91	1405.33	1979.93	3089.27	2442.5	13.34	26.08	29.65	46.12	52.11	45.29	23.0233	47.84	1.05512	0.00293953	0.0183356
ENSSSCG00000011549	63.112	187.177	255.39	315.258	575.026	438.247	1.61	3.24	5.39	7.34	9.7	8.13	3.41333	8.39	1.29749	0.00786375	0.036603
ENSSSCG00000011557	4522.69	5066.9	2404.39	1238.63	1080.36	2061.35	115.52	87.74	50.72	28.85	18.23	38.22	84.66	28.4333	-1.5741	5.11494e-05	0.000933288
ENSSSCG00000011563	300.84	667.779	763.688	1312.87	3108.8	1859.64	7.68	11.56	16.11	30.58	52.44	34.48	11.7833	39.1667	1.73288	6.55563e-06	0.000181347
ENSSSCG00000011568	862.467	215.683	694.026	51.3171	36.5554	265.267	22.03	3.74	14.64	1.2	0.62	4.92	13.47	2.24667	-2.58389	0.000583242	0.00574198
ENSSSCG00000011580	23.9695	265.521	296.322	443.17	771.892	642.573	0.61	4.6	6.25	10.32	13.02	11.92	3.82	11.7533	1.62143	0.00891096	0.0402205
ENSSSCG00000011593	280.711	668.817	605.62	958.928	1627.8	1456.08	7.17	11.58	12.78	22.34	27.46	27	10.51	25.6	1.28438	0.000398949	0.00440117
ENSSSCG00000011594	184.906	460.576	674.433	1224.66	2724.93	2328.3	4.72	7.98	14.23	28.53	45.97	43.17	8.97667	39.2233	2.12746	6.7e-07	2.98438e-05
ENSSSCG00000011610	1384.39	2224.42	2151.43	5470.91	10928.9	6699.3	35.36	38.52	45.39	127.44	184.37	124.23	39.7567	145.347	1.87023	3.10693e-08	2.51056e-06
ENSSSCG00000011611	1618.43	2257.55	2310.64	4347.86	14665.4	8646.68	41.34	39.09	48.75	101.28	247.4	160.34	43.06	169.673	1.97834	2.40699e-07	1.3195e-05
ENSSSCG00000011624	1716.51	2929.27	3389.97	4066	9059.83	4847.28	43.84	50.73	71.52	94.71	152.84	89.89	55.3633	112.48	1.02267	0.00342806	0.0204211
ENSSSCG00000011627	64.2008	45.2319	38.8958	198.526	714.752	109.652	1.64	0.78	0.82	4.62	12.06	2.03	1.08	6.23667	2.52974	8.01884e-05	0.0012993
ENSSSCG00000011628	765.106	2225.7	1974.98	2669.18	4741.68	5028.96	19.54	38.54	41.66	62.17	79.99	93.25	33.2467	78.47	1.23893	0.000526713	0.00529436
ENSSSCG00000011631	866.015	2105.82	2134.9	2536.38	3789.21	4725.72	22.12	36.47	45.04	59.08	63.92	87.63	34.5433	70.21	1.02327	0.0033315	0.0200468
ENSSSCG00000011652	543.749	1017.36	1135.36	1658.66	2947.48	2548.89	13.89	17.62	23.95	38.64	49.72	47.27	18.4867	45.21	1.29016	0.000134929	0.00190225
ENSSSCG00000011663	133006	165601	124643	50561.7	13328.5	74861.1	3397.29	2867.74	2629.51	1177.75	224.85	1388.18	2964.85	930.26	-1.67225	0.00125098	0.00987232
ENSSSCG00000011664	1111.35	555.485	505.67	235.305	235.568	222.254	28.39	9.62	10.67	5.48	3.97	4.12	16.2267	4.52333	-1.84291	0.000127375	0.00183456
ENSSSCG00000011670	516.387	776.027	792.507	1611.74	4429.48	2682.24	13.19	13.44	16.72	37.54	74.72	49.74	14.45	54	1.90189	8.79327e-08	5.75913e-06
ENSSSCG00000011672	583.108	1233.03	1154.99	1622.26	2604.25	2412.76	14.89	21.35	24.37	37.79	43.93	44.74	20.2033	42.1533	1.06105	0.00134638	0.0103814
ENSSSCG00000011678	205.077	709.528	612.026	1287.82	2176.68	2518.95	5.24	12.29	12.91	30	36.72	46.71	10.1467	37.81	1.89776	2.51136e-06	8.63297e-05
ENSSSCG00000011679	268.259	614.283	719.15	1263.1	2439.4	2053.31	6.85	10.64	15.17	29.42	41.15	38.08	10.8867	36.2167	1.73409	4.49828e-06	0.00013497
ENSSSCG00000011684	1229.49	3126.42	3997.71	4873.91	7669.23	7184.36	31.4	54.14	84.34	113.53	129.38	133.22	56.6267	125.377	1.14672	0.00238738	0.0158108
ENSSSCG00000011686	336.407	457.199	469.166	827.071	1310.74	951.688	8.59	7.92	9.9	19.27	22.11	17.65	8.80333	19.6767	1.16036	0.00114642	0.00930595
ENSSSCG00000011690	119.388	362.026	433.758	418.898	1097.49	723.297	3.05	6.27	9.15	9.76	18.51	13.41	6.15667	13.8933	1.17417	0.0115388	0.0488139
ENSSSCG00000011698	1155.74	1816.99	1611.04	2753.41	4532.87	2993.05	29.52	31.47	33.99	64.14	76.47	55.5	31.66	65.37	1.04597	0.000762346	0.00692961
ENSSSCG00000011720	3522.27	5448.71	5401.82	9107.91	17948.8	13376.2	89.97	94.36	113.96	212.15	302.79	248.04	99.43	254.327	1.35493	4.3896e-05	0.000836083
ENSSSCG00000011731	1308.67	3059.82	3951.02	5581.12	11349.3	8411.24	33.43	52.99	83.35	130	191.46	155.97	56.59	159.143	1.49171	0.000113047	0.0016787
ENSSSCG00000011735	18651.4	123142	56343	135530	156675	204406	476.4	2132.47	1188.63	3156.93	2643.03	3790.38	1265.83	3196.78	1.33653	0.00404943	0.0229677
ENSSSCG00000011740	255.611	475.621	647.724	809.698	1458.84	1078.55	6.53	8.24	13.66	18.86	24.61	20	9.47667	21.1567	1.15866	0.00292231	0.0182663
ENSSSCG00000011760	17.375	148.76	243.305	764.01	1976.19	1654.66	0.44	2.58	5.13	17.8	33.34	30.68	2.71667	27.2733	3.32758	3.07801e-07	1.58932e-05
ENSSSCG00000011772	900.237	3317.18	2644.19	3783.22	7694.94	7341.57	22.99	57.44	55.78	88.12	129.81	136.14	45.4033	118.023	1.3782	0.000386195	0.00429474
ENSSSCG00000011775	928.006	1544.08	1148.34	2036.47	3254.17	3013.8	23.7	26.74	24.23	47.44	54.9	55.89	24.89	52.7433	1.08342	0.000416179	0.00451914
ENSSSCG00000011776	325.331	1337.14	1146.78	1852.87	3917.55	3238.78	8.31	23.16	24.19	43.16	66.09	60.06	18.5533	56.4367	1.60495	8.95788e-05	0.00141104
ENSSSCG00000011810	710.237	906.063	1007.71	2450.93	7576.51	3591.58	18.14	15.69	21.26	57.09	127.81	66.6	18.3633	83.8333	2.1907	4.8957e-09	5.8021e-07
ENSSSCG00000011811	28.4047	76.4739	85.0518	152.586	406.653	604.406	0.73	1.32	1.79	3.55	6.86	11.21	1.28	7.20667	2.49319	6.62758e-06	0.000182868
ENSSSCG00000011831	124.029	215.88	180.287	271.863	1062.35	248.832	3.17	3.74	3.8	6.33	17.92	4.61	3.57	9.62	1.43011	0.00655716	0.032238
ENSSSCG00000011841	289.113	663.343	665.072	1061.06	1948.99	1585.07	7.38	11.49	14.03	24.72	32.88	29.39	10.9667	28.9967	1.40276	0.000115872	0.00170843
ENSSSCG00000011843	1146.78	2606.67	2956.51	3816.63	8599.83	6504.11	29.29	45.14	62.37	88.9	145.08	120.61	45.6	118.197	1.37408	0.000154206	0.00211337
ENSSSCG00000011854	131.068	736.721	735.526	1189.9	2237.12	1813.65	3.35	12.76	15.52	27.72	37.74	33.63	10.5433	33.03	1.64745	0.000525267	0.00528837
ENSSSCG00000011858	23.0269	328.411	381.165	827.872	1599.15	1571.78	0.59	5.69	8.04	19.28	26.98	29.15	4.77333	25.1367	2.39672	0.000212564	0.00266112
ENSSSCG00000011867	7667.54	21795.2	23555.2	7754.74	8822.19	9219.39	195.85	377.43	496.93	180.63	148.83	170.96	356.737	166.807	-1.09668	0.00382435	0.0220529
ENSSSCG00000011874	1330.51	2588.54	3199.89	3037.6	4680.86	12220	33.98	44.83	67.51	70.76	78.96	226.6	48.7733	125.44	1.36283	0.00277349	0.0176089
ENSSSCG00000011877	443.998	702.752	2200.47	2096.55	4904.05	5914.06	11.34	12.17	46.42	48.84	82.73	109.67	23.31	80.4133	1.78649	0.000503241	0.0051402
ENSSSCG00000011878	60.5338	59.9751	70.6514	217.298	509.281	291.929	1.55	1.04	1.49	5.06	8.59	5.41	1.36	6.35333	2.22391	2.0374e-06	7.22319e-05
ENSSSCG00000011880	361.704	295.93	620.43	1606.32	3766.7	2260.04	9.24	5.12	13.09	37.42	63.54	41.91	9.15	47.6233	2.37982	5.27814e-09	6.13842e-07
ENSSSCG00000011884	4436.18	4142.39	3956.64	8623.77	16924.1	10850.6	113.31	71.73	83.47	200.88	285.5	201.21	89.5033	229.197	1.35657	8.11632e-05	0.0013049
ENSSSCG00000011896	29.3546	91.2609	122.376	300.797	664.528	515.22	0.75	1.58	2.58	7.01	11.21	9.55	1.63667	9.25667	2.49973	1.39485e-06	5.35727e-05
ENSSSCG00000011904	77.9526	79.589	75.5561	210.405	243.542	197.354	1.99	1.38	1.59	4.9	4.11	3.66	1.65333	4.22333	1.353	0.0021904	0.0148179
ENSSSCG00000011916	1161.53	4213.89	3817.89	4613.88	8840.41	7210.52	29.67	72.97	80.54	107.47	149.13	133.71	61.06	130.103	1.09136	0.00529316	0.0277807
ENSSSCG00000011917	1465.47	2672.49	3583.46	4536.42	8862.79	7043.35	37.43	46.28	75.6	105.67	149.51	130.61	53.1033	128.597	1.27598	0.000356643	0.00404933
ENSSSCG00000011918	24.3882	75.281	94.6254	196.988	651.471	705.932	0.62	1.3	2	4.59	10.99	13.09	1.30667	9.55667	2.87062	4.05274e-07	2.03356e-05
ENSSSCG00000011925	92.9371	227.36	173.091	361.43	712.979	739.085	2.37	3.94	3.65	8.42	12.03	13.71	3.32	11.3867	1.77809	4.5087e-05	0.000853977
ENSSSCG00000011939	5482.87	7040.76	11002.5	4024.35	3821.87	2989.18	140.05	121.93	232.11	93.74	64.47	55.43	164.697	71.2133	-1.20959	0.00110681	0.00909828
ENSSSCG00000011940	118.726	297.587	214.659	489.119	649.478	525.912	3.03	5.15	4.53	11.39	10.96	9.75	4.23667	10.7	1.33661	0.00130191	0.0101256
ENSSSCG00000011943	65.5624	309.203	516.499	1004.28	2227.4	2478.46	1.67	5.35	10.9	23.39	37.58	45.96	5.97333	35.6433	2.57702	2.88877e-06	9.56058e-05
ENSSSCG00000011950	184.234	581.053	562.352	815.146	1583.53	1285.3	4.71	10.06	11.86	18.99	26.71	23.83	8.87667	23.1767	1.38458	0.000710142	0.00662442
ENSSSCG00000011953	298.535	1086.7	1058.97	1450.98	2431.81	2362.74	7.63	18.82	22.34	33.8	41.02	43.81	16.2633	39.5433	1.28181	0.00133253	0.0103102
ENSSSCG00000011959	353.248	1920.73	1679.13	3567.1	6337.82	4777.6	9.02	33.26	35.42	83.09	106.92	88.59	25.9	92.8667	1.84221	3.25878e-05	0.000665883
ENSSSCG00000011972	292.799	940.698	868.287	1157.06	1963.68	1875.99	7.48	16.29	18.32	26.95	33.13	34.79	14.03	31.6233	1.17247	0.00233071	0.015543
ENSSSCG00000011973	111.922	379.665	416.358	703.295	991.955	643.544	2.86	6.57	8.78	16.38	16.73	11.93	6.07	15.0133	1.30648	0.00395046	0.0226021
ENSSSCG00000012001	431.66	757.687	776.402	1585.18	2771.61	2278.95	11.03	13.12	16.38	36.92	46.76	42.26	13.51	41.98	1.63567	9.47742e-07	3.99786e-05
ENSSSCG00000012002	138.901	352.158	283.236	430.672	906.562	573.973	3.55	6.1	5.98	10.03	15.29	10.64	5.21	11.9867	1.20208	0.00406844	0.0230567
ENSSSCG00000012006	62.302	419.933	352.606	715.899	1171.92	983.871	1.59	7.27	7.44	16.68	19.77	18.24	5.43333	18.23	1.74641	0.000657101	0.0062515
ENSSSCG00000012007	26.2334	417.982	672.789	1008.83	1626.6	1626.45	0.67	7.24	14.19	23.5	27.44	30.16	7.36667	27.0333	1.87566	0.0060476	0.0304963
ENSSSCG00000012029	539.336	1575.16	1374.83	2215.81	3974.36	2968.92	13.78	27.28	29	51.61	67.05	55.05	23.3533	57.9033	1.31002	0.000234261	0.00287489
ENSSSCG00000012049	107.686	138.277	900.512	22.9534	31.4643	117.983	2.75	2.39	19	0.53	0.53	2.19	8.04667	1.08333	-2.89291	0.00042948	0.00461923
ENSSSCG00000012055	299.477	1246.04	1355.67	1348.96	2019.4	4609.33	7.65	21.58	28.6	31.42	34.07	85.47	19.2767	50.32	1.38428	0.00505552	0.0269876
ENSSSCG00000012056	60.9814	293.532	466.277	496.215	1119.49	681.743	1.56	5.08	9.84	11.56	18.89	12.64	5.49333	14.3633	1.38664	0.0116482	0.049169
ENSSSCG00000012059	223.844	902.955	989.601	1164.2	1923.37	1778.46	5.72	15.64	20.88	27.12	32.45	32.98	14.08	30.85	1.13162	0.00854992	0.0389869
ENSSSCG00000012061	1425.92	1679.55	1638.12	838.864	748.206	724.945	36.42	29.08	34.56	19.54	12.62	13.44	33.3533	15.2	-1.13376	0.000855183	0.0075528
ENSSSCG00000012076	689.256	506.269	1508.02	1045.9	3029.98	22759.3	17.61	8.77	31.81	24.36	51.11	422.04	19.3967	165.837	3.09588	0.000155964	0.00213277
ENSSSCG00000012077	1554.75	1808.91	4218.1	2342.43	4537.86	33751.7	39.71	31.33	88.99	54.56	76.55	625.87	53.3433	252.327	2.24191	0.00238674	0.0158108
ENSSSCG00000012100	133.821	177.002	111.664	54.4374	75.9901	46.3606	3.42	3.07	2.36	1.27	1.28	0.86	2.95	1.13667	-1.37591	0.00268652	0.0171312
ENSSSCG00000012102	360.126	3147	2242.46	4459.12	7874.14	5674.61	9.2	54.5	47.31	103.87	132.83	105.23	37.0033	113.977	1.62301	0.00113336	0.00926091
ENSSSCG00000012126	38.517	344.701	244.417	467.632	1061.58	779.834	0.98	5.97	5.16	10.89	17.91	14.46	4.03667	14.42	1.83683	0.00103016	0.00863256
ENSSSCG00000012130	82.8443	121.558	173.052	299.773	711.133	548.294	2.12	2.11	3.65	6.98	12	10.17	2.62667	9.71667	1.88723	3.25164e-05	0.000665517
ENSSSCG00000012136	463.651	683.042	705.317	323.886	345.987	273.36	11.84	11.83	14.88	7.54	5.84	5.07	12.85	6.15	-1.06311	0.00616542	0.0308494
ENSSSCG00000012147	308003	221510	282090	16284.2	337.207	74446.5	7867.11	3835.92	5951.08	379.31	5.69	1380.49	5884.7	588.497	-3.32186	0.0013306	0.0103036
ENSSSCG00000012160	1056.17	1349.2	1222.83	2903.89	7474.78	4361.9	26.98	23.36	25.8	67.64	126.1	80.88	25.38	91.54	1.85071	4.7449e-08	3.53566e-06
ENSSSCG00000012201	313.635	270.312	358.4	763.386	1158.68	1540.67	8.01	4.68	7.56	17.78	19.55	28.57	6.75	21.9667	1.70236	1.55969e-05	0.00037253
ENSSSCG00000012203	229.097	536.579	505.303	703.332	1241.03	1180.82	5.85	9.29	10.66	16.38	20.94	21.9	8.6	19.74	1.19871	0.00172815	0.0124307
ENSSSCG00000012241	346.967	895.574	972.968	1648.58	3099.84	2150.99	8.86	15.51	20.53	38.4	52.29	39.89	14.9667	43.5267	1.54015	3.5356e-05	0.000709629
ENSSSCG00000012250	411.101	997.101	1167.75	1545.71	3402.71	2432.33	10.5	17.27	24.64	36	57.4	45.1	17.47	46.1667	1.40197	0.000199265	0.00255108
ENSSSCG00000012251	1259.53	3573.1	2898.34	4162.87	7714.22	7617.39	32.17	61.88	61.14	96.97	130.14	141.25	51.73	122.787	1.24708	0.000441518	0.00468792
ENSSSCG00000012252	4650.68	12105.4	11446.1	15095.5	27975.6	25504	118.79	209.63	241.47	351.62	471.93	472.93	189.963	432.16	1.18584	0.00113997	0.00927784
ENSSSCG00000012254	457.563	420.227	525.519	898.151	1752.06	1952.53	11.69	7.28	11.09	20.92	29.56	36.21	10.02	28.8967	1.52802	3.48556e-05	0.000702531
ENSSSCG00000012262	574.837	1549.92	1311.34	2022.22	3488.7	2837.19	14.68	26.84	27.66	47.1	58.85	52.61	23.06	52.8533	1.1966	0.000503528	0.0051402
ENSSSCG00000012266	24.3808	114.571	167.662	794.485	1939.71	1430	0.62	1.98	3.54	18.51	32.72	26.52	2.04667	25.9167	3.66253	6.6152e-11	1.52444e-08
ENSSSCG00000012283	19.5226	43.6515	71.2227	168.517	299.016	408.925	0.5	0.76	1.5	3.93	5.04	7.58	0.92	5.51667	2.58409	1.51409e-06	5.72686e-05
ENSSSCG00000012307	105.498	406.84	532.526	819.732	1898.39	1389.66	2.69	7.05	11.23	19.09	32.02	25.77	6.99	25.6267	1.87428	9.27053e-05	0.00144746
ENSSSCG00000012325	1227.14	3013.53	3826.46	5326.57	12350.1	9692.45	31.34	52.19	80.72	124.07	208.34	179.73	54.75	170.713	1.64064	3.96875e-05	0.000774093
ENSSSCG00000012328	1216.32	4696.92	4515.19	7729.26	15333.1	13355	31.07	81.34	95.25	180.04	258.66	247.65	69.22	228.783	1.72472	3.58133e-05	0.00071765
ENSSSCG00000012329	193.428	728.101	790.058	1071.7	1849.94	1426.67	4.94	12.61	16.67	24.96	31.21	26.46	11.4067	27.5433	1.27183	0.00281699	0.0178214
ENSSSCG00000012352	19.2358	38.4768	31.5936	104.203	222.924	202.707	0.49	0.67	0.67	2.43	3.76	3.76	0.61	3.31667	2.44285	4.11039e-07	2.0542e-05
ENSSSCG00000012359	52.1148	174.367	250.935	298.323	544.991	447.389	1.33	3.02	5.29	6.95	9.19	8.3	3.21333	8.14667	1.34214	0.00856006	0.0389972
ENSSSCG00000012365	3021.89	6343.88	6520.07	9588.88	18098.5	11752.7	77.19	109.86	137.55	223.36	305.31	217.94	108.2	248.87	1.20169	0.000617605	0.00598557
ENSSSCG00000012376	813.284	1625	1179.92	690.399	344.008	612.836	20.77	28.14	24.89	16.08	5.8	11.36	24.6	11.08	-1.1507	0.00480035	0.0259496
ENSSSCG00000012392	2.79464	17.2164	21.6884	58.1503	67.3726	65.7925	0.07	0.3	0.46	1.35	1.14	1.22	0.276667	1.23667	2.16024	0.000172146	0.002281
ENSSSCG00000012394	341.971	1175.03	1014.77	360.238	275.523	471.48	8.73	20.35	21.41	8.39	4.65	8.74	16.83	7.26	-1.21299	0.00706215	0.0340098
ENSSSCG00000012396	923.76	2321.15	2169.79	3462.01	5466.59	4497.25	23.59	40.2	45.77	80.64	92.22	83.39	36.52	85.4167	1.22583	0.000254022	0.00306793
ENSSSCG00000012403	3106.72	4929.93	4829.92	9531.08	9223.1	9619.28	79.35	85.37	101.89	222.01	155.59	178.37	88.87	185.323	1.06028	0.00124148	0.00984014
ENSSSCG00000012416	134.044	197.357	193.507	285.228	483.157	425.885	3.42	3.42	4.08	6.64	8.15	7.9	3.64	7.56333	1.05508	0.00959311	0.0425282
ENSSSCG00000012426	27.3997	93.0176	105.725	165.932	265.737	178.396	0.7	1.61	2.23	3.87	4.48	3.31	1.51333	3.88667	1.3608	0.00679714	0.0330534
ENSSSCG00000012434	369.894	1026.13	1159.93	1856.77	3662.21	3354.58	9.45	17.77	24.47	43.25	61.78	62.21	17.23	55.7467	1.69396	1.00334e-05	0.000260659
ENSSSCG00000012437	369.024	990.697	765.68	1058.08	1727.2	1828.72	9.43	17.16	16.15	24.65	29.14	33.91	14.2467	29.2333	1.03699	0.00374285	0.0217301
ENSSSCG00000012446	898.984	685.235	691.49	1631.1	2869.46	1622.02	22.96	11.87	14.59	37.99	48.41	30.08	16.4733	38.8267	1.23692	0.000689622	0.00648162
ENSSSCG00000012481	1447.95	1715.24	1499.39	766.569	906.746	766.851	36.98	29.7	31.63	17.86	15.3	14.22	32.77	15.7933	-1.05306	0.00124067	0.00983995
ENSSSCG00000012487	84.143	62.6095	68.6503	234.077	372.929	257.354	2.15	1.08	1.45	5.45	6.29	4.77	1.56	5.50333	1.81876	8.7888e-05	0.0013893
ENSSSCG00000012491	179.469	397.108	461.101	890.289	1779.41	1392.23	4.58	6.88	9.73	20.74	30.02	25.82	7.06333	25.5267	1.85358	2.47466e-06	8.53037e-05
ENSSSCG00000012525	289.078	338.725	333.571	77.9902	126.517	98.6974	7.38	5.87	7.04	1.82	2.13	1.83	6.76333	1.92667	-1.81163	2.37555e-05	0.000509953
ENSSSCG00000012540	138.985	141.859	125.381	416.356	811.833	393.048	3.55	2.46	2.65	9.7	13.7	7.29	2.88667	10.23	1.82533	3.64672e-05	0.000726077
ENSSSCG00000012542	54.2798	159.854	206.827	366.957	658.306	911.968	1.39	2.77	4.36	8.55	11.11	16.91	2.84	12.19	2.10174	3.40772e-05	0.000689312
ENSSSCG00000012560	792.553	1226.31	1421.59	2362.22	4682.79	2581.56	20.24	21.24	29.99	55.02	79	47.87	23.8233	60.63	1.34766	8.09014e-05	0.00130406
ENSSSCG00000012583	668.278	1406.52	1480.93	2141.71	3621.46	2910.53	17.07	24.36	31.24	49.89	61.09	53.97	24.2233	54.9833	1.1826	0.000409359	0.00448769
ENSSSCG00000012608	29.2145	157.861	254.738	449.027	973.181	1089.49	0.75	2.73	5.37	10.46	16.42	20.2	2.95	15.6933	2.41136	4.4388e-05	0.000842018
ENSSSCG00000012619	3064.16	3185	3050.84	6355.67	13257	7307.82	78.27	55.16	64.36	148.04	223.64	135.51	65.93	169.063	1.35856	9.17955e-05	0.00144048
ENSSSCG00000012634	700.28	1001.07	950.103	2568.27	5428.6	3544.8	17.89	17.34	20.04	59.82	91.58	65.73	18.4233	72.3767	1.97399	1.88143e-09	2.63062e-07
ENSSSCG00000012639	618.077	1997.58	2022.19	2775.97	4453.24	4738.49	15.79	34.59	42.66	64.66	75.12	87.87	31.0133	75.8833	1.29089	0.000640812	0.00611993
ENSSSCG00000012642	1601.39	3710.15	3779.07	5804.63	11769.3	9598.02	40.9	64.25	79.72	135.21	198.54	177.98	61.6233	170.577	1.46887	4.70386e-05	0.000878724
ENSSSCG00000012643	332.325	202.439	417.042	1089.38	1871.93	1779.27	8.49	3.51	8.8	25.38	31.58	32.99	6.93333	29.9833	2.11254	3.15468e-07	1.61551e-05
ENSSSCG00000012651	676.759	822.493	727.014	3088.53	18151.9	1264.82	17.29	14.24	15.34	71.94	306.21	23.45	15.6233	133.867	3.09902	3.60007e-06	0.000113416
ENSSSCG00000012652	5160.59	3390.43	3116.06	9065.8	16586.6	9809.22	131.81	58.71	65.74	211.17	279.81	181.9	85.42	224.293	1.39274	0.000306272	0.00357864
ENSSSCG00000012656	715.397	1559.86	1199.49	2523.33	3649.72	3127.79	18.27	27.01	25.3	58.78	61.57	58	23.5267	59.45	1.33738	2.70081e-05	0.000566233
ENSSSCG00000012659	97.2298	374.142	336.834	569.821	695.795	615.128	2.48	6.48	7.11	13.27	11.74	11.41	5.35667	12.14	1.18036	0.00924439	0.0413803
ENSSSCG00000012676	37.4898	52.8483	42.418	145.512	535.564	309.815	0.96	0.92	0.89	3.39	9.03	5.75	0.923333	6.05667	2.7136	1.07119e-07	6.64283e-06
ENSSSCG00000012680	193.092	523.746	390.18	78.971	50.454	80.4226	4.93	9.07	8.23	1.84	0.85	1.49	7.41	1.39333	-2.41093	1.00018e-06	4.14874e-05
ENSSSCG00000012695	335.595	637.256	582.982	972.083	1257.69	1102.07	8.57	11.04	12.3	22.64	21.22	20.44	10.6367	21.4333	1.01081	0.00379959	0.0219932
ENSSSCG00000012703	3491.68	7339.69	7115.62	9313.23	17159.5	13130.1	89.19	127.1	150.11	216.94	289.47	243.48	122.133	249.963	1.03326	0.00253788	0.0164658
ENSSSCG00000012727	262.601	1020.37	989.318	1578.61	2073.55	2135.83	6.71	17.67	20.87	36.77	34.98	39.61	15.0833	37.12	1.29924	0.00144527	0.0108792
ENSSSCG00000012730	83.3425	101.939	141.25	902.38	2896.14	1573.2	2.13	1.77	2.98	21.02	48.86	29.17	2.29333	33.0167	3.84768	1.64515e-17	2.9246e-14
ENSSSCG00000012742	275.482	696.861	675.528	1171.83	1864.23	1195.35	7.04	12.07	14.25	27.3	31.45	22.17	11.12	26.9733	1.27838	0.000649739	0.0061862
ENSSSCG00000012743	80.6933	1116.77	1057.22	1907.27	3120.07	2337	2.06	19.34	22.3	44.43	52.63	43.34	14.5667	46.8	1.68384	0.00422225	0.0236742
ENSSSCG00000012766	1488.77	2630.15	1214.45	867.637	801.941	658.905	38.03	45.55	25.62	20.21	13.53	12.22	36.4	15.32	-1.24852	0.000581567	0.00573296
ENSSSCG00000012773	197.06	224.957	158.959	59.0241	31.6609	64.6944	5.03	3.9	3.35	1.37	0.53	1.2	4.09333	1.03333	-1.98597	7.84879e-05	0.00128009
ENSSSCG00000012790	3279.58	2674.66	2413.68	5831.27	10204.4	5238.71	83.77	46.32	50.92	135.83	172.14	97.14	60.3367	135.037	1.16224	0.00139065	0.0105972
ENSSSCG00000012840	10215.8	13470.7	8745.05	5634.51	5696.52	5866.43	260.94	233.27	184.49	131.25	96.1	108.78	226.233	112.043	-1.01375	0.00217016	0.0147491
ENSSSCG00000012855	4821.26	6931.57	4074.42	2297.99	1161.4	2284.74	123.15	120.04	85.96	53.53	19.59	42.37	109.717	38.4967	-1.51098	9.26164e-05	0.00144746
ENSSSCG00000012883	1355.78	857.54	802.57	312.726	403.284	249.089	34.63	14.85	16.93	7.28	6.8	4.62	22.1367	6.23333	-1.82836	2.34979e-05	0.000507653
ENSSSCG00000012953	2775.02	3601.66	3135.03	1543.36	1953.41	1306.51	70.88	62.37	66.14	35.95	32.95	24.23	66.4633	31.0433	-1.09828	0.00048744	0.00505055
ENSSSCG00000012956	1717.71	1598.05	1440.17	3231.71	4967.33	3119.73	43.87	27.67	30.38	75.28	83.8	57.85	33.9733	72.31	1.08979	0.000934142	0.00808491
ENSSSCG00000012996	1327.84	2598.27	938.572	873.428	1073.14	346.199	33.92	44.99	19.8	20.34	18.1	6.42	32.9033	14.9533	-1.13777	0.0118441	0.0498049
ENSSSCG00000013008	423.077	873.664	1284.82	1747.18	3373.29	2413.39	10.81	15.13	27.1	40.7	56.91	44.75	17.68	47.4533	1.42439	0.000191782	0.00247788
ENSSSCG00000013030	14808	17158.3	8256.53	6576.75	7695.19	6089.23	378.23	297.13	174.18	153.19	129.81	112.92	283.18	131.973	-1.10147	0.0024834	0.0162684
ENSSSCG00000013041	2065.17	2157.51	2186.74	5093.33	11576.9	5559.51	52.75	37.36	46.13	118.64	195.3	103.09	45.4133	139.01	1.614	6.09261e-06	0.000171919
ENSSSCG00000013060	686.128	1423.89	844.702	169.136	81.141	216.105	17.53	24.66	17.82	3.94	1.37	4.01	20.0033	3.10667	-2.6868	1.58257e-08	1.43748e-06
ENSSSCG00000013062	4120.58	6193.33	6498.93	9229.22	18570.8	10884.6	105.25	107.25	137.1	214.98	313.28	201.84	116.533	243.367	1.06239	0.00174387	0.0125077
ENSSSCG00000013111	793.025	678.937	562.388	1726.29	2581.57	1333.38	20.26	11.76	11.86	40.21	43.55	24.73	14.6267	36.1633	1.30593	0.000462854	0.00486056
ENSSSCG00000013223	319.772	1049.48	1237.96	1560.92	3278.59	2402.45	8.17	18.17	26.12	36.36	55.31	44.55	17.4867	45.4067	1.37665	0.000847077	0.00751676
ENSSSCG00000013233	151.855	690.776	886.765	1656.1	3141.83	2685.77	3.88	11.96	18.71	38.58	53	49.8	11.5167	47.1267	2.03282	1.71746e-05	0.000400976
ENSSSCG00000013244	276.372	414.703	498.624	155.001	249.328	175.357	7.06	7.18	10.52	3.61	4.21	3.25	8.25333	3.69	-1.16136	0.00560502	0.0289648
ENSSSCG00000013249	1079.62	3094.27	3239.54	4521.72	10089.2	6855.27	27.58	53.58	68.34	105.33	170.2	127.12	49.8333	134.217	1.42938	0.000209294	0.00264412
ENSSSCG00000013305	2651.5	7884	9028.77	9734.91	20672.3	17964.2	67.73	136.53	190.47	226.76	348.73	333.12	131.577	302.87	1.2028	0.00275128	0.0174946
ENSSSCG00000013307	725.729	861.023	879.715	2627.56	7582.11	4758.31	18.54	14.91	18.56	61.2	127.91	88.24	17.3367	92.45	2.41485	1.45528e-11	4.89447e-09
ENSSSCG00000013320	19.4212	23.5329	27.4127	38.2109	162.815	74.9799	0.5	0.41	0.58	0.89	2.75	1.39	0.496667	1.67667	1.75525	0.00124727	0.00986424
ENSSSCG00000013332	88.3018	271.842	326.66	557.231	882.218	813.021	2.26	4.71	6.89	12.98	14.88	15.08	4.62	14.3133	1.63139	0.000324565	0.0037668
ENSSSCG00000013351	13.5501	107.589	114.849	389.22	772.639	506.492	0.35	1.86	2.42	9.07	13.03	9.39	1.54333	10.4967	2.76581	4.17115e-06	0.00012722
ENSSSCG00000013352	131.535	674.622	810.395	905.455	2033.32	1355.77	3.36	11.68	17.1	21.09	34.3	25.14	10.7133	26.8433	1.32516	0.00708165	0.0340773
ENSSSCG00000013388	327.161	664.781	715.363	1151.06	1932.46	1454.84	8.36	11.51	15.09	26.81	32.6	26.98	11.6533	28.7967	1.30516	0.000242161	0.00296017
ENSSSCG00000013399	69.9054	238.863	272.095	335.903	591.365	768.04	1.79	4.14	5.74	7.82	9.98	14.24	3.89	10.68	1.45707	0.00329582	0.0198996
ENSSSCG00000013406	375.145	1739.81	1858.99	2113.09	4037.11	3183.28	9.58	30.13	39.22	49.22	68.1	59.03	26.31	58.7833	1.1598	0.0081509	0.0375527
ENSSSCG00000013410	1401.36	2098.33	1700.12	4689.05	11102.5	6943.79	35.79	36.34	35.87	109.22	187.29	128.76	36	141.757	1.97735	4.5457e-09	5.4486e-07
ENSSSCG00000013411	396.787	1049.48	1047.68	1230.25	2806.18	1764.32	10.13	18.17	22.1	28.66	47.34	32.72	16.8	36.24	1.10912	0.00343237	0.0204268
ENSSSCG00000013418	62690.4	40490.4	32638.9	22732.3	27953	19505.3	1601.26	701.18	688.56	529.51	471.55	361.69	997	454.25	-1.13411	0.00451201	0.024822
ENSSSCG00000013436	8648.91	6451.88	4843.19	2383.61	2206.92	1687.7	220.91	111.73	102.17	55.52	37.23	31.3	144.937	41.35	-1.80946	4.55603e-06	0.000136287
ENSSSCG00000013437	1282.33	2380.47	2514.06	4738.47	9120.5	5581.91	32.75	41.22	53.04	110.37	153.86	103.51	42.3367	122.58	1.53374	5.62017e-06	0.000161299
ENSSSCG00000013457	878.966	1968.39	1852.45	2632.66	4334.91	3720.49	22.45	34.09	39.08	61.32	73.13	68.99	31.8733	67.8133	1.08922	0.000860777	0.00758605
ENSSSCG00000013474	541.299	403.175	276.708	1230.63	1725.01	793.689	13.83	6.98	5.84	28.67	29.1	14.72	8.88333	24.1633	1.44365	0.000913238	0.00795265
ENSSSCG00000013509	638.239	1300.56	1492.03	1784.52	3754.92	2273.16	16.3	22.52	31.48	41.57	63.34	42.15	23.4333	49.02	1.06481	0.00255324	0.0165363
ENSSSCG00000013517	623.559	1794.08	2567.81	3504.17	8566.24	5007.99	15.93	31.07	54.17	81.62	144.51	92.87	33.7233	106.333	1.65677	0.000111342	0.00166132
ENSSSCG00000013553	1841.8	1660.67	1764.28	4152.83	8592.8	4705.1	47.04	28.76	37.22	96.73	144.96	87.25	37.6733	109.647	1.54125	7.79148e-06	0.000210319
ENSSSCG00000013566	290.325	658.391	688.019	988.756	1397.96	1448.3	7.42	11.4	14.51	23.03	23.58	26.86	11.11	24.49	1.14033	0.00191264	0.0133652
ENSSSCG00000013568	464.555	3191.22	2445.97	6198.51	8142.03	5437.99	11.87	55.26	51.6	144.38	137.35	100.84	39.5767	127.523	1.68804	0.000371835	0.00417338
ENSSSCG00000013569	3052.86	2265.73	1375.61	743.885	656.819	477.153	77.98	39.24	29.02	17.33	11.08	8.85	48.7467	12.42	-1.97264	3.68974e-06	0.000115076
ENSSSCG00000013593	66810.9	65473.1	43775.5	27156	32112.5	27429.4	1706.51	1133.81	923.5	632.55	541.72	508.64	1254.61	560.97	-1.16124	0.00104397	0.00871887
ENSSSCG00000013614	5890.28	14879.7	15499.4	4291.44	3525.08	4320.18	150.45	257.67	326.98	99.96	59.47	80.11	245.033	79.8467	-1.61767	2.04649e-05	0.000449939
ENSSSCG00000013622	2427.25	2055.04	1924.17	852.525	841.957	1061.39	62	35.59	40.59	19.86	14.2	19.68	46.06	17.9133	-1.36248	8.68922e-05	0.00137919
ENSSSCG00000013629	1633.96	3793.41	3731.41	6018.85	12157.7	7421.99	41.74	65.69	78.72	140.2	205.09	137.63	62.05	160.973	1.37532	0.00014143	0.00197305
ENSSSCG00000013648	724.097	2857.97	2656.77	3939.25	5752.6	4959.27	18.5	49.49	56.05	91.76	97.04	91.96	41.3467	93.5867	1.17853	0.00246615	0.0162202
ENSSSCG00000013658	413.136	559.918	755.951	2445.36	6595.28	3976.6	10.55	9.7	15.95	56.96	111.26	73.74	12.0667	80.6533	2.74071	3.832e-13	1.70305e-10
ENSSSCG00000013659	1044.04	3064.93	3470.08	5773.56	14513.6	8582.54	26.67	53.08	73.21	134.49	244.84	159.15	50.9867	179.493	1.81574	1.30652e-05	0.000323871
ENSSSCG00000013715	99.3807	429.907	431.855	603.008	900.932	864.94	2.54	7.44	9.11	14.05	15.2	16.04	6.36333	15.0967	1.24638	0.00758276	0.0357082
ENSSSCG00000013721	9987.4	7908.86	5549.24	3133.16	4336.48	3213.3	255.1	136.96	117.07	72.98	73.15	59.59	169.71	68.5733	-1.30735	0.000427384	0.00460465
ENSSSCG00000013740	57.1478	47.4439	42.0873	102.68	261.365	161.36	1.46	0.82	0.89	2.39	4.41	2.99	1.05667	3.26333	1.62683	0.000785906	0.00709711
ENSSSCG00000013751	184.508	1278.17	1531.19	2074.38	3816.5	2460.5	4.71	22.13	32.3	48.32	64.38	45.63	19.7133	52.7767	1.42073	0.00561221	0.0289786
ENSSSCG00000013772	772.686	1107.65	1195.09	1594.78	4209.83	2147.42	19.74	19.18	25.21	37.15	71.02	39.82	21.3767	49.33	1.20643	0.00060059	0.00586636
ENSSSCG00000013787	35.4107	51.3353	27.4957	135.181	424.126	156.445	0.9	0.89	0.58	3.15	7.15	2.9	0.79	4.4	2.47758	3.16858e-06	0.000101623
ENSSSCG00000013788	329.466	544.452	686.541	985.561	1638.17	1442.65	8.42	9.43	14.48	22.96	27.64	26.75	10.7767	25.7833	1.25853	0.000465462	0.00487784
ENSSSCG00000013839	2020.93	1255.29	1093.22	3378.06	4547.46	2710.34	51.62	21.74	23.06	78.69	76.71	50.26	32.14	68.5533	1.09286	0.00480039	0.0259496
ENSSSCG00000013853	2005.06	2297.49	2574.69	2780.27	5943.93	8029.03	51.21	39.79	54.32	64.76	100.27	148.89	48.44	104.64	1.11116	0.00191143	0.0133652
ENSSSCG00000013876	769.24	4156.02	4217.19	8145.46	14034.1	9250.64	19.65	71.97	88.97	189.73	236.75	171.54	60.1967	199.34	1.72748	0.000228239	0.00281542
ENSSSCG00000013885	998.016	921.193	701.286	2182.92	3415.69	1917.99	25.49	15.95	14.79	50.85	57.62	35.57	18.7433	48.0133	1.35706	0.000117208	0.00171473
ENSSSCG00000013888	2248.01	2146.01	2372.66	5727.65	8627.1	5105.78	57.42	37.16	50.05	133.42	145.54	94.68	48.21	124.547	1.36928	4.68406e-05	0.000876518
ENSSSCG00000013894	176.446	180.671	240.189	386.534	621.671	450.568	4.51	3.13	5.07	9	10.49	8.36	4.23667	9.28333	1.13171	0.00630506	0.0313089
ENSSSCG00000013911	149.207	247.681	271.315	75.123	87.6274	97.2501	3.81	4.29	5.72	1.75	1.48	1.8	4.60667	1.67667	-1.45813	0.000947733	0.00813351
ENSSSCG00000013936	9202.41	8709.25	7483.29	4362.72	5256.17	3982.42	235.05	150.82	157.87	101.62	88.67	73.85	181.247	88.0467	-1.04161	0.00215346	0.0146595
ENSSSCG00000014009	296.285	991.679	1011.89	1649.21	3210.25	2522.54	7.57	17.17	21.35	38.42	54.16	46.78	15.3633	46.4533	1.59629	5.80097e-05	0.00102104
ENSSSCG00000014044	653.179	1495.47	1664.77	2997.96	6277.53	5503.03	16.68	25.9	35.12	69.83	105.9	102.05	25.9	92.5933	1.83796	3.36525e-07	1.71628e-05
ENSSSCG00000014054	25.5947	91.9726	80.6135	107.177	312.61	127.646	0.65	1.59	1.7	2.5	5.27	2.37	1.31333	3.38	1.36379	0.0106242	0.0460335
ENSSSCG00000014056	720.372	1945.82	1649.98	2942.88	4401.39	3199.11	18.4	33.7	34.81	68.55	74.25	59.32	28.97	67.3733	1.21762	0.000378266	0.00423304
ENSSSCG00000014057	563.938	1774.32	1726.47	2040.69	3655.16	3280.8	14.4	30.73	36.42	47.53	61.66	60.84	27.1833	56.6767	1.06003	0.00440824	0.0244003
ENSSSCG00000014072	16.206	204.411	263.858	392.37	846.935	704.207	0.41	3.54	5.57	9.14	14.29	13.06	3.17333	12.1633	1.93847	0.00344386	0.0204854
ENSSSCG00000014081	33.8053	306.032	380.018	724.185	1240.83	1221.96	0.86	5.3	8.02	16.87	20.93	22.66	4.72667	20.1533	2.09212	0.00043019	0.00462287
ENSSSCG00000014082	179.042	535.184	601.72	875.35	1247.28	1349.79	4.57	9.27	12.69	20.39	21.04	25.03	8.84333	22.1533	1.32486	0.00144601	0.0108792
ENSSSCG00000014084	181.578	576.216	450.282	852.849	1020.04	854.409	4.64	9.98	9.5	19.87	17.21	15.84	8.04	17.64	1.13358	0.00528905	0.0277709
ENSSSCG00000014093	138.769	110.516	54.456	444.584	512.983	258.828	3.54	1.91	1.15	10.36	8.65	4.8	2.2	7.93667	1.85103	0.000413204	0.00450366
ENSSSCG00000014094	276.21	1151.36	1051.67	1591.14	3285.23	2668.31	7.06	19.94	22.19	37.06	55.42	49.48	16.3967	47.32	1.52905	0.000257521	0.00308728
ENSSSCG00000014100	3729.81	5652.24	6369.62	2237.41	2771.59	2905.29	95.27	97.88	134.38	52.12	46.76	53.87	109.177	50.9167	-1.10045	0.000508081	0.00517394
ENSSSCG00000014112	13.0794	43.9403	55.6957	135.456	387.28	426.967	0.33	0.76	1.17	3.16	6.53	7.92	0.753333	5.87	2.962	2.59148e-07	1.39603e-05
ENSSSCG00000014116	188.988	477.681	437.508	729.263	804.272	874.802	4.83	8.27	9.23	16.99	13.57	16.22	7.44333	15.5933	1.06691	0.00710579	0.0341224
ENSSSCG00000014117	60.0464	151.768	226.634	26.2381	40.9658	36.9713	1.53	2.63	4.78	0.61	0.69	0.69	2.98	0.663333	-2.16751	4.0866e-05	0.000792114
ENSSSCG00000014119	707.745	1887.93	1185.72	2387.75	3883.18	2954.97	18.08	32.69	25.01	55.62	65.51	54.8	25.26	58.6433	1.21511	0.00027159	0.00322796
ENSSSCG00000014126	192.3	518.358	476.353	709.537	1536.09	1033.57	4.91	8.98	10.05	16.53	25.91	19.17	7.98	20.5367	1.36374	0.000706983	0.00660984
ENSSSCG00000014141	1614.01	1315.34	852.086	637.452	529.376	814.764	41.23	22.78	17.98	14.85	8.93	15.11	27.33	12.9633	-1.07605	0.0073592	0.0350068
ENSSSCG00000014146	212.792	782.531	783.748	1217.51	1951.34	1919.57	5.44	13.55	16.53	28.36	32.92	35.6	11.84	32.2933	1.44757	0.000438924	0.00466835
ENSSSCG00000014149	763.193	984.481	1167.07	2749.85	7246.02	4369.7	19.49	17.05	24.62	64.05	122.24	81.03	20.3867	89.1067	2.12791	1.50688e-09	2.25922e-07
ENSSSCG00000014163	155.718	359.484	393.057	647.342	925.221	904.194	3.98	6.23	8.29	15.08	15.61	16.77	6.16667	15.82	1.35919	0.000748933	0.00685537
ENSSSCG00000014165	338.671	1485.85	1465.84	1801.21	2738.87	2759.51	8.65	25.73	30.92	41.96	46.2	51.17	21.7667	46.4433	1.09335	0.00906493	0.0407529
ENSSSCG00000014173	188.487	305.777	412.635	1717.7	5178.23	5269.49	4.81	5.3	8.71	40.01	87.35	97.71	6.27333	75.0233	3.58004	8.44205e-17	1.16725e-13
ENSSSCG00000014177	593.545	1370.68	1399.23	2015.18	3496.67	3700.32	15.16	23.74	29.52	46.94	58.99	68.62	22.8067	58.1833	1.35115	0.000106306	0.0015948
ENSSSCG00000014199	500.723	961.736	1110.07	1471.83	2445.15	1712.27	12.79	16.65	23.42	34.28	41.25	31.75	17.62	35.76	1.02113	0.0032714	0.0197906
ENSSSCG00000014204	1084.71	2310.79	2532.79	3275.51	7154.16	5848.6	27.71	40.02	53.43	76.3	120.69	108.45	40.3867	101.813	1.33398	0.000136517	0.00191739
ENSSSCG00000014207	734.568	2054.75	1726.66	2762.17	3965.81	5115.66	18.76	35.58	36.43	64.34	66.9	94.86	30.2567	75.3667	1.31667	0.000193221	0.00248396
ENSSSCG00000014211	81.6054	893.326	806.573	1356.36	2255.86	2350.5	2.08	15.47	17.02	31.59	38.06	43.59	11.5233	37.7467	1.71179	0.00217964	0.0147931
ENSSSCG00000014242	7.02234	76.7595	72.6039	160.68	234.056	263.887	0.18	1.33	1.53	3.74	3.95	4.89	1.01333	4.19333	2.04899	0.000937099	0.00810372
ENSSSCG00000014248	1284.17	4928.34	6460.36	7350.35	17127.5	10875.1	32.8	85.34	136.29	171.21	288.93	201.66	84.81	220.6	1.37913	0.00251118	0.0163723
ENSSSCG00000014267	521.137	1221.45	1214.42	2179.3	4154.6	3843.64	13.31	21.15	25.62	50.76	70.09	71.27	20.0267	64.04	1.67705	1.8178e-06	6.63364e-05
ENSSSCG00000014291	177.202	544.197	580.076	1074.75	2012.93	2344.32	4.53	9.42	12.24	25.03	33.96	43.47	8.73	34.1533	1.96797	2.58091e-06	8.77508e-05
ENSSSCG00000014303	946.791	1739.94	1465.05	2329.19	3817.92	3473.25	24.18	30.13	30.91	54.25	64.41	64.41	28.4067	61.0233	1.10313	0.000371268	0.00417338
ENSSSCG00000014326	319.929	1444.95	1621.65	1770.61	3560.74	2518.87	8.17	25.02	34.21	41.24	60.07	46.71	22.4667	49.34	1.13497	0.0103124	0.0449958
ENSSSCG00000014329	1686.85	4220.15	5266.09	1231.84	994.733	2212.78	43.09	73.08	111.1	28.69	16.78	41.03	75.7567	28.8333	-1.39364	0.00079833	0.00718324
ENSSSCG00000014331	817.034	2220.57	2204.22	2753.95	5047.82	3681.11	20.87	38.45	46.5	64.15	85.15	68.26	35.2733	72.52	1.0398	0.00319801	0.0194601
ENSSSCG00000014343	3181.72	8032.02	9603.03	13096.5	22078.9	18115.5	81.27	139.09	202.59	305.06	372.46	335.92	140.983	337.813	1.2607	0.00081504	0.00728617
ENSSSCG00000014351	337.558	366.367	331.351	151.285	180.383	201.472	8.62	6.34	6.99	3.52	3.04	3.74	7.31667	3.43333	-1.09158	0.00856158	0.0389972
ENSSSCG00000014361	7670.51	10099.1	4825.04	3019.35	2947.48	3533.27	195.92	174.89	101.79	70.33	49.72	65.52	157.533	61.8567	-1.34866	0.000171893	0.00228042
ENSSSCG00000014401	927.91	2471.16	2241.79	2910.74	5452.58	5301.92	23.7	42.79	47.29	67.8	91.98	98.32	37.9267	86.0333	1.18168	0.000659699	0.00626186
ENSSSCG00000014411	689.221	2531.49	3354.22	3930.13	8401.44	5865.33	17.6	43.84	70.76	91.55	141.73	108.76	44.0667	114.013	1.37144	0.00176484	0.0126289
ENSSSCG00000014565	4527.06	4292.59	4993.12	5707.49	12370.1	16343.6	115.63	74.34	105.34	132.95	208.68	303.07	98.4367	214.9	1.1264	0.0026681	0.0170512
ENSSSCG00000014567	15.1627	115.107	140.357	499.3	613.296	567.725	0.39	1.99	2.96	11.63	10.35	10.53	1.78	10.8367	2.60597	1.34535e-05	0.000330207
ENSSSCG00000014570	13.0758	51.8448	38.467	97.9862	172.076	47.8456	0.33	0.9	0.81	2.28	2.9	0.89	0.68	2.02333	1.57313	0.00572491	0.0293871
ENSSSCG00000014575	96.1071	236.857	136.401	303.095	496.861	296.551	2.45	4.1	2.88	7.06	8.38	5.5	3.14333	6.98	1.15093	0.00864632	0.0392968
ENSSSCG00000014633	3111.74	3591.28	3505.32	2036.4	1945.96	1325.68	79.48	62.19	73.95	47.43	32.83	24.58	71.8733	34.9467	-1.0403	0.00202871	0.0139941
ENSSSCG00000014634	1.99287	55.5969	63.5962	146.97	132.981	136.461	0.05	0.96	1.34	3.42	2.24	2.53	0.783333	2.73	1.8012	0.0111893	0.0477176
ENSSSCG00000014670	1957	3359.86	6393.44	5977.26	10247.9	22869.1	49.99	58.18	134.88	139.23	172.88	424.07	81.0167	245.393	1.59881	0.00102611	0.00860436
ENSSSCG00000014672	1810.42	1118.23	1154.41	5248.77	9079.24	8109.41	46.24	19.36	24.35	122.26	153.16	150.38	29.9833	141.933	2.24298	4.55364e-09	5.4486e-07
ENSSSCG00000014725	15562.3	11011.3	5519.02	5660.04	1458.18	2649.6	397.5	190.68	116.43	131.84	24.6	49.13	234.87	68.5233	-1.7772	0.00166425	0.0120828
ENSSSCG00000014794	1528.75	3920.82	3461.71	4560.77	8575.23	6889.24	39.05	67.9	73.03	106.24	144.66	127.75	59.9933	126.217	1.07303	0.00214019	0.0145852
ENSSSCG00000014800	5267.32	2188.89	1936.15	1525.14	1576.99	1286.84	134.54	37.91	40.85	35.53	26.6	23.86	71.1	28.6633	-1.31064	0.00418636	0.0235298
ENSSSCG00000014803	47.8463	93.3216	81.7607	22.7543	35.7037	41.4121	1.22	1.62	1.72	0.53	0.6	0.77	1.52	0.633333	-1.26303	0.00771014	0.0361375
ENSSSCG00000014818	3283.03	4283.29	4913.93	1524.81	2674.37	1949.44	83.86	74.17	103.67	35.52	45.12	36.15	87.2333	38.93	-1.164	0.000192609	0.00248375
ENSSSCG00000014820	1469.8	2041.65	1961.91	3485.53	4758.09	5140.41	37.54	35.36	41.39	81.19	80.27	95.32	38.0967	85.5933	1.16783	0.000105509	0.0015857
ENSSSCG00000014833	2636.38	2182.2	1759.52	6506.66	17550.4	7192.78	67.34	37.79	37.12	151.56	296.07	133.38	47.4167	193.67	2.03013	8.30719e-07	3.56465e-05
ENSSSCG00000014835	551.139	877.638	974.343	1400.6	2789.81	3148.36	14.08	15.2	20.56	32.62	47.06	58.38	16.6133	46.02	1.46992	2.70285e-05	0.000566233
ENSSSCG00000014838	95.717	248.631	225.418	293.789	817.343	453.654	2.44	4.31	4.76	6.84	13.79	8.41	3.83667	9.68	1.33515	0.00380692	0.0219932
ENSSSCG00000014851	1844.11	3369.19	3229.12	4802.61	9238.37	5023.81	47.1	58.34	68.12	111.87	155.85	93.16	57.8533	120.293	1.05608	0.00167346	0.0121426
ENSSSCG00000014868	243.467	690.574	658.979	792.878	1621.26	1382.94	6.22	11.96	13.9	18.47	27.35	25.64	10.6933	23.82	1.15546	0.00338672	0.0202909
ENSSSCG00000014901	729.203	2362.67	2109.99	3406.27	3936.43	4332.47	18.63	40.91	44.51	79.34	66.41	80.34	34.6833	75.3633	1.11962	0.00198592	0.0137983
ENSSSCG00000014920	486.056	1081.34	869.93	1323.98	2502.71	1548.52	12.41	18.73	18.35	30.84	42.22	28.71	16.4967	33.9233	1.0401	0.0026639	0.0170435
ENSSSCG00000014946	838.312	1567.7	1454.02	2564.65	3427.96	3236.94	21.41	27.15	30.67	59.74	57.83	60.02	26.41	59.1967	1.16443	0.00021693	0.0027076
ENSSSCG00000014955	246.672	673.952	774.786	1023.43	1824.73	1485.66	6.3	11.67	16.35	23.84	30.78	27.55	11.44	27.39	1.25956	0.00132032	0.0102368
ENSSSCG00000014967	248.755	550.356	446.99	1197.73	1693.45	1555.59	6.35	9.53	9.43	27.9	28.57	28.85	8.43667	28.44	1.75318	6.56308e-07	2.94841e-05
ENSSSCG00000014969	754.301	1370.44	1462.17	1953.16	3548.02	2706.39	19.27	23.73	30.85	45.5	59.85	50.19	24.6167	51.8467	1.07462	0.00100607	0.0085063
ENSSSCG00000014976	122.471	358.454	323.826	361.312	593.245	1101.36	3.13	6.21	6.83	8.42	10.01	20.42	5.39	12.95	1.26459	0.00776296	0.0362575
ENSSSCG00000014987	61.0993	130.474	139.198	975.068	1705.85	1347.87	1.56	2.26	2.94	22.71	28.78	24.99	2.25333	25.4933	3.49999	5.449e-17	8.47592e-14
ENSSSCG00000015010	212.698	906.291	657.788	1197.34	1552.21	2818.28	5.43	15.69	13.88	27.89	26.19	52.26	11.6667	35.4467	1.60326	0.000302981	0.00355018
ENSSSCG00000015013	721.159	1550.92	1570.01	1867.85	3847.84	3457.34	18.42	26.86	33.12	43.51	64.91	64.11	26.1333	57.51	1.13792	0.000944758	0.00813351
ENSSSCG00000015016	2588.57	880.035	1162.89	3786.2	10522.3	4924.13	66.12	15.24	24.53	88.19	177.51	91.31	35.2967	119.003	1.7534	0.000385009	0.00429253
ENSSSCG00000015036	0	49.0143	46.4863	94.1785	262.962	219.052	0	0.85	0.98	2.19	4.44	4.06	0.61	3.56333	2.54635	0.00168481	0.0121997
ENSSSCG00000015052	317.217	991.044	803.039	1173.69	1774.23	1710.5	8.1	17.16	16.94	27.34	29.93	31.72	14.0667	29.6633	1.0764	0.00363408	0.0213314
ENSSSCG00000015069	251742	284722	98830.2	49816.4	2505.06	90388.5	6430.08	4930.57	2084.96	1160.39	42.26	1676.11	4481.87	959.587	-2.22362	0.00611877	0.0307396
ENSSSCG00000015073	36901.5	41575.1	39943.9	12329.4	12210.5	11189.8	942.55	719.96	842.67	287.19	205.98	207.5	835.06	233.557	-1.83811	9.42205e-08	6.01272e-06
ENSSSCG00000015093	2212	1782.24	1464.11	3897.47	6294.24	4537.97	56.5	30.86	30.89	90.78	106.18	84.15	39.4167	93.7033	1.24929	0.000257978	0.00308977
ENSSSCG00000015095	3071.18	3072.53	3224.93	5073.31	9456.43	7453.63	78.45	53.21	68.03	118.17	159.53	138.22	66.5633	138.64	1.05854	0.00141725	0.0107407
ENSSSCG00000015098	887.641	491.417	424.379	2083.36	3198.67	2086.4	22.67	8.51	8.95	48.53	53.96	38.69	13.3767	47.06	1.81478	1.23978e-05	0.000312346
ENSSSCG00000015115	57.9616	525.292	608.261	1716.25	4167.95	3579.66	1.48	9.1	12.83	39.98	70.31	66.38	7.80333	58.89	2.91586	5.56609e-07	2.61375e-05
ENSSSCG00000015120	1104.6	1709.97	964.207	441.952	605.724	523.871	28.21	29.61	20.34	10.29	10.22	9.71	26.0533	10.0733	-1.37093	7.60377e-05	0.00124995
ENSSSCG00000015129	97.5122	614.657	639.699	1423.76	3126.46	3276.47	2.49	10.64	13.5	33.16	52.74	60.76	8.87667	48.8867	2.46135	1.79441e-06	6.58691e-05
ENSSSCG00000015135	2710.21	4111.03	4620.59	6861.29	16748.1	13415.7	69.23	71.19	97.48	159.82	282.53	248.77	79.3	230.373	1.53858	1.24405e-05	0.000312346
ENSSSCG00000015136	51.7299	385.297	477.242	1033.49	2056.71	1457.37	1.32	6.67	10.07	24.07	34.7	27.02	6.02	28.5967	2.24801	5.58546e-05	0.000988698
ENSSSCG00000015137	160.935	165.227	136.653	444.461	1092.89	648.01	4.11	2.86	2.88	10.35	18.44	12.02	3.28333	13.6033	2.05073	1.97459e-06	7.06085e-05
ENSSSCG00000015212	106.792	230.171	170.512	59.3573	64.0234	75.7471	2.73	3.99	3.6	1.38	1.08	1.4	3.44	1.28667	-1.41877	0.00155333	0.0114716
ENSSSCG00000015235	2991.05	5210.66	5413.51	14866.6	32094.8	19693.5	76.4	90.23	114.21	346.29	541.42	365.19	93.6133	417.633	2.15745	1.57631e-09	2.28089e-07
ENSSSCG00000015238	25.3442	300.631	220.943	429.316	763.118	739.204	0.65	5.21	4.66	10	12.87	13.71	3.50667	12.1933	1.79792	0.00275979	0.0175397
ENSSSCG00000015241	8379.22	17456.1	12914.2	6738.22	5538.75	7659.26	214.02	302.29	272.44	156.96	93.44	142.03	262.917	130.81	-1.00713	0.00342759	0.0204211
ENSSSCG00000015247	730.422	1681.06	1972.02	2742.56	6505.16	5327.06	18.66	29.11	41.6	63.88	109.74	98.78	29.79	90.8	1.60786	1.4121e-05	0.000341872
ENSSSCG00000015268	251.094	931.854	533.276	280.019	240.943	254.455	6.41	16.14	11.25	6.52	4.06	4.72	11.2667	5.1	-1.14349	0.0113064	0.0480687
ENSSSCG00000015284	787.616	1472.68	1309.86	2964.3	2654.42	3195.44	20.12	25.5	27.63	69.05	44.78	59.25	24.4167	57.6933	1.24054	0.000151153	0.0020807
ENSSSCG00000015288	476.488	1060.07	1107.44	1555.96	3072.31	2422.22	12.17	18.36	23.36	36.24	51.83	44.92	17.9633	44.33	1.30323	0.000211551	0.00266092
ENSSSCG00000015310	1236.7	4748.83	4023.15	5336.51	7178.25	8223.87	31.59	82.24	84.87	124.3	121.09	152.5	66.2333	132.63	1.00178	0.0105895	0.045987
ENSSSCG00000015314	458.712	1331.05	1379.33	1715.82	2680.55	2589.93	11.72	23.05	29.1	39.97	45.22	48.03	21.29	44.4067	1.0606	0.00394275	0.0225788
ENSSSCG00000015334	2226.31	4259.54	5073.06	845.394	1406.78	1690.76	56.87	73.76	107.02	19.69	23.73	31.35	79.2167	24.9233	-1.66831	2.03359e-06	7.22319e-05
ENSSSCG00000015345	178.524	343.335	459.458	810.599	1316.05	865.905	4.56	5.95	9.69	18.88	22.2	16.06	6.73333	19.0467	1.50015	0.000243302	0.00296537
ENSSSCG00000015368	251.34	300.635	327.308	617.355	1504.6	964.247	6.42	5.21	6.91	14.38	25.38	17.88	6.18	19.2133	1.63643	3.14021e-05	0.000645897
ENSSSCG00000015375	475.13	1086.32	872.212	1472.75	2032.58	2669.57	12.14	18.81	18.4	34.31	34.29	49.5	16.45	39.3667	1.25889	0.000253603	0.00306793
ENSSSCG00000015378	135.997	176.7	244.545	610.041	1222.79	973.299	3.47	3.06	5.16	14.21	20.63	18.05	3.89667	17.63	2.17772	1.0706e-07	6.64283e-06
ENSSSCG00000015383	459.754	1904.22	1617.51	1919.73	4411.44	3365.92	11.74	32.98	34.12	44.72	74.42	62.42	26.28	60.52	1.20345	0.00334509	0.0200899
ENSSSCG00000015384	2776.83	2548.22	2247.39	1364.92	1348.21	933.307	70.93	44.13	47.41	31.79	22.74	17.31	54.1567	23.9467	-1.17731	0.000832131	0.00739646
ENSSSCG00000015410	172.222	279.101	310.153	496.442	816.773	633.377	4.4	4.83	6.54	11.56	13.78	11.74	5.25667	12.36	1.23346	0.00168721	0.0121997
ENSSSCG00000015411	660.016	1459.83	1509.95	2144.22	4612.18	3677.66	16.86	25.28	31.85	49.95	77.81	68.2	24.6633	65.32	1.40516	5.61694e-05	0.000992858
ENSSSCG00000015414	36.4095	159.086	248.03	299.049	576.705	529.674	0.93	2.75	5.23	6.97	9.73	9.82	2.97	8.84	1.57358	0.00469814	0.025637
ENSSSCG00000015430	300.3	575.265	819.682	961.438	1723.11	1372.71	7.67	9.96	17.29	22.4	29.07	25.45	11.64	25.64	1.13931	0.00300643	0.0186285
ENSSSCG00000015432	153.694	499.506	515.237	684.146	1088.63	874.233	3.93	8.65	10.87	15.94	18.36	16.21	7.81667	16.8367	1.10698	0.00985453	0.0434857
ENSSSCG00000015447	92.1505	66.7355	100.435	162.705	259.005	249.335	2.35	1.16	2.12	3.79	4.37	4.62	1.87667	4.26	1.18268	0.00994456	0.0437899
ENSSSCG00000015480	986.112	3946.67	4075.1	6454.62	10389.9	12027.9	25.19	68.35	85.97	150.35	175.27	223.04	59.8367	182.887	1.61185	0.000176115	0.00231604
ENSSSCG00000015488	68.2642	93.0473	86.7494	177.501	325.264	187.376	1.74	1.61	1.83	4.13	5.49	3.47	1.72667	4.36333	1.33744	0.00247501	0.0162567
ENSSSCG00000015494	191.787	459.768	353.304	711.124	686.248	939.563	4.9	7.96	7.45	16.56	11.58	17.42	6.77	15.1867	1.16558	0.00331457	0.0199838
ENSSSCG00000015496	117.046	224.414	333.968	427.941	890.732	591.245	2.99	3.89	7.05	9.97	15.03	10.96	4.64333	11.9867	1.3682	0.00224749	0.015134
ENSSSCG00000015498	279.292	686.98	735.858	1157.21	2107.35	2969.66	7.13	11.9	15.52	26.96	35.55	55.07	11.5167	39.1933	1.76689	1.11304e-05	0.00028558
ENSSSCG00000015499	1998.51	3754.15	2940.97	4448.8	7873.68	7643.83	51.05	65.01	62.04	103.63	132.83	141.74	59.3667	126.067	1.08646	0.000788512	0.00711548
ENSSSCG00000015519	282.831	510.782	613.793	717.709	1632.28	1733.2	7.22	8.85	12.95	16.72	27.54	32.14	9.67333	25.4667	1.39653	0.000387191	0.00429814
ENSSSCG00000015523	595.073	692.632	686.177	2046.46	3981.27	3047.99	15.2	11.99	14.48	47.67	67.16	56.52	13.89	57.1167	2.03987	4.07157e-10	7.60587e-08
ENSSSCG00000015540	88.6927	101.34	98.8389	212.808	311.422	271.116	2.27	1.75	2.09	4.96	5.25	5.03	2.03667	5.08	1.31862	0.00201612	0.0139614
ENSSSCG00000015558	1320.33	2854.58	2598.68	3804.81	6707.54	5207.28	33.72	49.43	54.82	88.63	113.15	96.56	45.99	99.4467	1.1126	0.000628537	0.00603978
ENSSSCG00000015559	413.753	586.642	929.893	1311.54	1972.29	1484	10.57	10.16	19.62	30.55	33.27	27.52	13.45	30.4467	1.17868	0.00126321	0.00993643
ENSSSCG00000015567	42.5557	573.258	596.441	1094.1	3351.22	1963.45	1.09	9.93	12.58	25.49	56.53	36.41	7.86667	39.4767	2.32718	0.000243875	0.00296945
ENSSSCG00000015568	521.776	609.221	437.14	885.549	1589.89	1043.97	13.33	10.55	9.22	20.63	26.82	19.36	11.0333	22.27	1.01323	0.00446773	0.0246438
ENSSSCG00000015569	135.145	363.548	281.538	509.569	832.323	756.721	3.45	6.3	5.94	11.87	14.04	14.03	5.23	13.3133	1.34799	0.000909134	0.00795029
ENSSSCG00000015576	1381.5	3978.51	4302.18	5485.09	9962.78	8114.81	35.29	68.9	90.76	127.77	168.07	150.48	64.9833	148.773	1.19497	0.00174858	0.0125342
ENSSSCG00000015581	445.018	1850.33	3043.53	3959.98	7109.73	5763.02	11.37	32.04	64.21	92.24	119.94	106.87	35.8733	106.35	1.56784	0.00113554	0.00926091
ENSSSCG00000015584	4.04332	26.0238	31.8534	95.1023	170.027	214.73	0.1	0.45	0.67	2.22	2.87	3.98	0.406667	3.02333	2.89422	1.46719e-06	5.56637e-05
ENSSSCG00000015590	566.688	2031.92	1168.52	2909.35	4313.43	3396.1	14.47	35.19	24.65	67.77	72.77	62.98	24.77	67.84	1.45354	6.12766e-05	0.00106201
ENSSSCG00000015593	159.439	368.528	424.229	893.578	1567.71	994.336	4.07	6.38	8.95	20.81	26.45	18.44	6.46667	21.9	1.75984	1.4444e-05	0.000348336
ENSSSCG00000015598	245.587	499.224	547.832	751.871	1300.07	893.019	6.27	8.65	11.56	17.51	21.93	16.56	8.82667	18.6667	1.08052	0.00483069	0.0260456
ENSSSCG00000015600	9.68067	154.948	238.136	290.242	697.808	502.531	0.25	2.68	5.02	6.76	11.77	9.32	2.65	9.28333	1.80865	0.0115405	0.0488139
ENSSSCG00000015644	1064.03	1470.69	1189.05	2624.7	3272.84	2452.13	27.18	25.47	25.08	61.14	55.21	45.47	25.91	53.94	1.05785	0.00066867	0.0063133
ENSSSCG00000015649	183.253	325.625	293.529	638.403	1830.72	936.498	4.68	5.64	6.19	14.87	30.88	17.37	5.50333	21.04	1.93476	2.88716e-06	9.56058e-05
ENSSSCG00000015664	623.472	813.38	564.839	1985.01	2447.1	1354.12	15.92	14.09	11.92	46.24	41.28	25.11	13.9767	37.5433	1.42554	5.97316e-05	0.0010425
ENSSSCG00000015667	72.1027	234.088	174.807	306.684	565.869	518.767	1.84	4.05	3.69	7.14	9.55	9.62	3.19333	8.77	1.45751	0.00128111	0.0100328
ENSSSCG00000015677	231.161	543.366	372.411	109.914	96.1393	195.786	5.9	9.41	7.86	2.56	1.62	3.63	7.72333	2.60333	-1.56886	0.000751404	0.0068703
ENSSSCG00000015694	83.1614	294.806	351.793	416.163	861.985	575.999	2.12	5.11	7.42	9.69	14.54	10.68	4.88333	11.6367	1.25274	0.00953397	0.0423263
ENSSSCG00000015700	38.0725	50.8073	58.6744	389.906	988.488	571.56	0.97	0.88	1.24	9.08	16.68	10.6	1.03	12.12	3.55667	1.09486e-13	6.48786e-11
ENSSSCG00000015710	9960.56	13277.9	12467.8	21909.8	38302.7	31611.8	254.42	229.93	263.03	510.35	646.15	586.19	249.127	580.897	1.2214	0.000180559	0.00235768
ENSSSCG00000015712	989.018	2021.35	2458.91	3009.55	6243.6	4626.21	25.26	35	51.87	70.1	105.33	85.79	37.3767	87.0733	1.22009	0.000462304	0.00485896
ENSSSCG00000015729	516.633	1447.32	2514.39	3213.37	4505.46	2884.11	13.2	25.06	53.04	74.85	76	53.48	30.4333	68.11	1.16221	0.00804433	0.037239
ENSSSCG00000015743	142.233	427.533	492.012	604.796	1052.18	1385.49	3.63	7.4	10.38	14.09	17.75	25.69	7.13667	19.1767	1.42603	0.00152432	0.0112908
ENSSSCG00000015747	80.8445	70.1262	47.3717	173.003	308.854	219.742	2.06	1.21	1	4.03	5.21	4.07	1.42333	4.43667	1.6402	0.000491777	0.0050864
ENSSSCG00000015754	295.847	811.956	756.523	1294.69	3663.78	2563.29	7.56	14.06	15.96	30.16	61.81	47.53	12.5267	46.5	1.89223	1.74004e-06	6.46359e-05
ENSSSCG00000015756	56.5528	79.0557	105.337	189.125	343.965	184.706	1.44	1.37	2.22	4.41	5.8	3.43	1.67667	4.54667	1.43921	0.00183778	0.0129939
ENSSSCG00000015786	117.015	463.616	708.482	665.965	1487.03	1537.03	2.99	8.03	14.95	15.51	25.09	28.5	8.65667	23.0333	1.41184	0.00525475	0.0276491
ENSSSCG00000015791	43.9311	205.624	268.57	404.346	670.695	744.773	1.12	3.56	5.67	9.42	11.31	13.81	3.45	11.5133	1.73864	0.00124321	0.00984756
ENSSSCG00000015796	1005.18	2691.41	2293.75	926.518	1016.5	860.535	25.67	46.61	48.39	21.58	17.15	15.96	40.2233	18.23	-1.14172	0.00123122	0.0097837
ENSSSCG00000015808	417.538	933.016	1005.62	1746.92	3589.23	3375.28	10.66	16.16	21.21	40.69	60.55	62.59	16.01	54.61	1.77019	9.12074e-07	3.86595e-05
ENSSSCG00000015814	132.651	261.367	321.31	761.3	1887.06	1553.23	3.39	4.53	6.78	17.73	31.83	28.8	4.9	26.12	2.4143	8.05565e-09	8.71691e-07
ENSSSCG00000015818	365.307	1825.37	1671.31	2715.75	3095.65	4237.48	9.33	31.61	35.26	63.26	52.22	78.58	25.4	64.6867	1.34864	0.00202611	0.0139916
ENSSSCG00000015820	94.7845	961.862	1129.86	2242.07	3990.24	3809.87	2.42	16.66	23.84	52.23	67.31	70.65	14.3067	63.3967	2.14772	0.000180558	0.00235768
ENSSSCG00000015851	133.822	469.161	537.033	842.583	1568.76	1771.58	3.42	8.12	11.33	19.63	26.46	32.85	7.62333	26.3133	1.7873	7.00533e-05	0.00117486
ENSSSCG00000015853	802.37	2923.91	2327.1	4396.56	6979.55	6824.83	20.49	50.63	49.09	102.41	117.74	126.56	40.07	115.57	1.52817	4.66437e-05	0.000874147
ENSSSCG00000015867	1474.49	2853.78	3305.19	5223.16	9798.47	7876.77	37.66	49.42	69.73	121.66	165.3	146.06	52.27	144.34	1.46542	2.52163e-05	0.000532754
ENSSSCG00000015868	28.2403	468.155	591.444	1034.28	1933.71	1533.14	0.72	8.11	12.48	24.09	32.62	28.43	7.10333	28.38	1.99831	0.00248787	0.0162856
ENSSSCG00000015883	482.849	1443.44	1245.45	2220.76	3915.3	3109.74	12.33	25	26.27	51.73	66.05	57.67	21.2	58.4833	1.46396	4.55133e-05	0.000859434
ENSSSCG00000015888	69.6624	354.865	459.729	892.889	1543.78	1247.71	1.78	6.15	9.7	20.8	26.04	23.14	5.87667	23.3267	1.98891	9.90715e-05	0.00152391
ENSSSCG00000015896	276.334	447.968	306.618	695.374	777.129	733.456	7.06	7.76	6.47	16.2	13.11	13.6	7.09667	14.3033	1.01114	0.00647183	0.0319332
ENSSSCG00000015897	1032.1	1535.11	1804.53	1618.28	2404.06	7619.18	26.36	26.58	38.07	37.7	40.56	141.29	30.3367	73.1833	1.27045	0.00658212	0.0323108
ENSSSCG00000015940	683.671	2246.81	1974.9	2376.75	4277.6	3788.58	17.46	38.91	41.66	55.36	72.16	70.25	32.6767	65.9233	1.01253	0.00569985	0.0293337
ENSSSCG00000015949	422.443	1128.64	887.701	1476.77	3160.71	2152.28	10.79	19.54	18.73	34.4	53.32	39.91	16.3533	42.5433	1.37935	0.000114007	0.00168692
ENSSSCG00000015952	1175.32	1627.3	1955.46	2754.19	4835.77	3437.87	30.02	28.18	41.25	64.15	81.58	63.75	33.15	69.8267	1.07477	0.000741105	0.00681116
ENSSSCG00000015958	1027.8	1149.95	1171.74	2238.48	4404.34	2624.49	26.25	19.91	24.72	52.14	74.3	48.67	23.6267	58.37	1.30481	6.98722e-05	0.0011734
ENSSSCG00000015961	850.362	2391.61	2543.06	2787.21	8474.37	4496.76	21.72	41.42	53.65	64.92	142.96	83.39	38.93	97.09	1.31844	0.0010962	0.00903562
ENSSSCG00000015962	1310.15	4319.77	4611.73	5476.1	8882.83	8906.39	33.46	74.81	97.29	127.56	149.85	165.16	68.52	147.523	1.10635	0.00524339	0.0276127
ENSSSCG00000016008	445.181	1029.23	983.364	1299.09	2291.08	1774.18	11.37	17.82	20.75	30.26	38.65	32.9	16.6467	33.9367	1.02761	0.00322983	0.0196154
ENSSSCG00000016009	1103.91	1414.88	1773.82	4574.62	7710.78	6822.27	28.2	24.5	37.42	106.56	130.08	126.51	30.04	121.05	2.01065	7.36092e-10	1.23783e-07
ENSSSCG00000016053	24.1934	257.013	364.357	617.342	794.374	1402.58	0.62	4.45	7.69	14.38	13.4	26.01	4.25333	17.93	2.07571	0.00148552	0.0110872
ENSSSCG00000016056	1800.64	5190.55	3504.42	5854.12	10178.1	10379.6	45.99	89.89	73.93	136.36	171.7	192.47	69.9367	166.843	1.25437	0.000443463	0.00470456
ENSSSCG00000016057	5072.35	10612.5	18187.5	12087.3	29055.1	47677.1	129.56	183.78	383.69	281.55	490.15	884.1	232.343	551.933	1.24824	0.00915596	0.0410731
ENSSSCG00000016067	5451.11	8105.46	5889.12	12940.8	23653.4	19390.8	139.23	140.36	124.24	301.43	399.02	359.57	134.61	353.34	1.39227	1.8503e-05	0.000417878
ENSSSCG00000016070	130.802	718.407	751.506	1092.89	1955.42	1885.58	3.34	12.44	15.85	25.46	32.99	34.97	10.5433	31.14	1.56244	0.00108114	0.00895718
ENSSSCG00000016074	627.08	902.648	729.908	2294.34	5026.22	3325.11	16.02	15.63	15.4	53.44	84.79	61.66	15.6833	66.63	2.08694	2.87928e-10	5.59839e-08
ENSSSCG00000016075	6434.63	14176.3	12122.9	21107.4	27836	27779.3	164.36	245.49	255.75	491.66	469.58	515.12	221.867	492.12	1.14932	0.000633698	0.00606711
ENSSSCG00000016086	193.787	498.748	433.807	559.611	876.943	1113.24	4.95	8.64	9.15	13.04	14.79	20.64	7.58	16.1567	1.09186	0.00726537	0.0346346
ENSSSCG00000016092	171.844	363.453	574.144	1335.33	2557.46	1908.03	4.39	6.29	12.11	31.1	43.14	35.38	7.59667	36.54	2.26604	5.06604e-08	3.73029e-06
ENSSSCG00000016094	4341.75	8932.37	8694.47	11525.3	19122	17170.4	110.9	154.68	183.42	268.46	322.58	318.4	149.667	303.147	1.01826	0.00251453	0.0163723
ENSSSCG00000016098	78.5065	569.868	688.399	742.453	1441.83	1482.37	2.01	9.87	14.52	17.29	24.32	27.49	8.8	23.0333	1.38815	0.0109509	0.0470692
ENSSSCG00000016104	232.076	1035.71	970.258	1462.51	3158.94	2054.9	5.93	17.94	20.47	34.07	53.29	38.1	14.78	41.82	1.50055	0.000560158	0.00557649
ENSSSCG00000016109	129.382	599.753	479.938	716.86	1211.16	979.601	3.3	10.39	10.12	16.7	20.43	18.17	7.93667	18.4333	1.21571	0.00698999	0.0337407
ENSSSCG00000016113	214.883	1127.87	1017.59	1134.93	1982.06	3145.76	5.49	19.53	21.47	26.44	33.44	58.33	15.4967	39.4033	1.34636	0.0049718	0.0266333
ENSSSCG00000016117	19.8399	95.8445	74.5066	194.159	228.005	273.603	0.51	1.66	1.57	4.52	3.85	5.07	1.24667	4.48	1.84542	0.000336777	0.0038661
ENSSSCG00000016119	9.44669	50.5404	44.1855	273.215	440.55	718.378	0.24	0.88	0.93	6.36	7.43	13.32	0.683333	9.03667	3.72513	2.19875e-10	4.41311e-08
ENSSSCG00000016122	105.645	77.533	92.9207	338.744	343.555	468.901	2.7	1.34	1.96	7.89	5.8	8.7	2	7.46333	1.89982	3.83356e-05	0.000758422
ENSSSCG00000016123	20.9889	193.651	175.545	315.491	573.333	623.776	0.54	3.35	3.7	7.35	9.67	11.57	2.53	9.53	1.91334	0.00133941	0.0103461
ENSSSCG00000016125	70.0836	187.192	128.927	270.259	491.599	662.102	1.79	3.24	2.72	6.3	8.29	12.28	2.58333	8.95667	1.79373	0.00010455	0.00157516
ENSSSCG00000016147	75.2335	670.24	738.818	1647.22	2412.94	2934.78	1.92	11.61	15.59	38.37	40.71	54.42	9.70667	44.5	2.19676	7.72849e-05	0.00126711
ENSSSCG00000016164	207.065	270.71	321.615	1288.02	2880.92	2647.1	5.29	4.69	6.78	30	48.6	49.09	5.58667	42.5633	2.92955	4.77995e-15	4.57552e-12
ENSSSCG00000016170	54.4977	203.67	260.566	671.587	1147.49	956.722	1.39	3.53	5.5	15.64	19.36	17.74	3.47333	17.58	2.33954	1.76775e-06	6.547e-05
ENSSSCG00000016175	155.583	162.176	198.555	614.054	1242.21	1106.94	3.97	2.81	4.19	14.3	20.96	20.53	3.65667	18.5967	2.34644	6.86294e-09	7.62522e-07
ENSSSCG00000016194	392.677	835.293	792.936	1055.54	1804.15	1657.53	10.03	14.46	16.73	24.59	30.44	30.74	13.74	28.59	1.05713	0.00231991	0.0154794
ENSSSCG00000016219	234.907	300.786	264.431	107.947	145.814	111.771	6	5.21	5.58	2.51	2.46	2.07	5.59667	2.34667	-1.25395	0.00303999	0.0187834
ENSSSCG00000016230	47.8872	120.36	152.103	304.999	700.905	478.504	1.22	2.08	3.21	7.1	11.82	8.87	2.17	9.26333	2.09384	1.59419e-05	0.000379314
ENSSSCG00000016237	505.393	1340.42	1265.7	2691.87	4797.11	4808.21	12.91	23.21	26.7	62.7	80.92	89.16	20.94	77.5933	1.88967	1.32823e-07	7.83339e-06
ENSSSCG00000016256	46.6633	229.105	130.023	218.948	635.967	475.299	1.19	3.97	2.74	5.1	10.73	8.81	2.63333	8.21333	1.64108	0.00162358	0.0118706
ENSSSCG00000016263	1014.82	2096.66	2341.64	3439.23	5149.77	6878.55	25.92	36.31	49.4	80.11	86.87	127.55	37.21	98.1767	1.39969	6.25785e-05	0.00107493
ENSSSCG00000016298	2267.07	2070.28	2266.22	6388.9	14711.9	7952.93	57.91	35.85	47.81	148.82	248.18	147.47	47.19	181.49	1.94334	1.11253e-07	6.85361e-06
ENSSSCG00000016313	117.624	326.354	445.687	675.245	1130.28	734.693	3	5.65	9.4	15.73	19.07	13.62	6.01667	16.14	1.4236	0.00169897	0.0122634
ENSSSCG00000016337	5.03489	36.9596	29.8514	250.804	797.107	360.64	0.13	0.64	0.63	5.84	13.45	6.69	0.466667	8.66	4.2139	2.23696e-11	6.95919e-09
ENSSSCG00000016395	157.483	424.552	720.134	1178.98	2608.08	2628.38	4.02	7.35	15.19	27.46	44	48.74	8.85333	40.0667	2.17811	3.06931e-06	9.89495e-05
ENSSSCG00000016411	617.072	1771.91	1605.12	2370.85	3915.86	2798.78	15.76	30.68	33.86	55.22	66.06	51.9	26.7667	57.7267	1.1088	0.00183915	0.0129963
ENSSSCG00000016435	837.296	973.269	790.841	343.666	389.937	328.231	21.39	16.85	16.68	8.01	6.58	6.09	18.3067	6.89333	-1.4091	0.000162814	0.00219271
ENSSSCG00000016443	11412.3	11381.9	4053.24	3053.05	3399.06	3329.96	291.5	197.1	85.51	71.12	57.34	61.75	191.37	63.4033	-1.59373	0.00014729	0.0020388
ENSSSCG00000016444	14265	26288	9560.32	7874.52	6179.66	10058.7	364.36	455.23	201.69	183.42	104.25	186.52	340.427	158.063	-1.10684	0.00458138	0.0250927
ENSSSCG00000016452	187.012	564.541	728.68	1484.06	1842.86	2022.87	4.78	9.78	15.37	34.57	31.09	37.51	9.97667	34.39	1.78536	1.92135e-05	0.00043022
ENSSSCG00000016469	2409.95	2389.89	3227.53	113.828	70.5463	1350.66	61.56	41.39	68.09	2.65	1.19	25.05	57.0133	9.63	-2.56569	0.00113729	0.00926205
ENSSSCG00000016494	320.305	1245.08	694.043	1552.55	2431.5	2337.23	8.18	21.56	14.64	36.16	41.02	43.34	14.7933	40.1733	1.44129	0.000165881	0.00221722
ENSSSCG00000016501	571.153	1332.05	1378.56	1959.95	2432.32	2631.94	14.59	23.07	29.08	45.65	41.03	48.81	22.2467	45.1633	1.02156	0.0028355	0.0179021
ENSSSCG00000016512	1449.41	2276.13	2200.7	3470.04	4721.97	7259.27	37.02	39.42	46.43	80.83	79.66	134.61	40.9567	98.3667	1.26407	0.000151721	0.0020862
ENSSSCG00000016543	617.529	958.07	887.4	1108.4	2382.12	2247.54	15.77	16.59	18.72	25.82	40.19	41.68	17.0267	35.8967	1.07605	0.0014825	0.0110734
ENSSSCG00000016553	1060.62	2304.72	1990.31	2871.51	5459.9	3641.36	27.09	39.91	41.99	66.89	92.11	67.52	36.33	75.5067	1.05544	0.00115463	0.00933002
ENSSSCG00000016563	246.497	650.6	737.11	792.348	1756.02	1068.14	6.3	11.27	15.55	18.46	29.62	19.81	11.04	22.63	1.0355	0.0113232	0.0481074
ENSSSCG00000016566	344.171	917.293	877.688	1284.07	2682.39	1831.97	8.79	15.88	18.52	29.91	45.25	33.97	14.3967	36.3767	1.33728	0.000333648	0.00384081
ENSSSCG00000016568	464.663	1448.38	1954.15	3751.34	5274.94	3669.21	11.87	25.08	41.23	87.38	88.99	68.04	26.06	81.47	1.64443	6.59465e-05	0.00112416
ENSSSCG00000016597	319.415	748.354	708.645	1163.3	2042.38	1399.48	8.16	12.96	14.95	27.1	34.45	25.95	12.0233	29.1667	1.27848	0.000381485	0.00426368
ENSSSCG00000016618	199.828	668.483	490.171	606.042	1268.54	1111.34	5.1	11.58	10.34	14.12	21.4	20.61	9.00667	18.71	1.05474	0.0106539	0.0461298
ENSSSCG00000016639	64.6312	155.695	144.455	214.789	435.628	336.826	1.65	2.7	3.05	5	7.35	6.25	2.46667	6.2	1.32971	0.00305412	0.018839
ENSSSCG00000016659	51.9846	105.274	164.805	337.501	700.261	774.704	1.33	1.82	3.48	7.86	11.81	14.37	2.21	11.3467	2.36015	1.80321e-06	6.59973e-05
ENSSSCG00000016682	260.71	825.396	820.33	1075.84	2437.01	2242.45	6.66	14.29	17.31	25.06	41.11	41.58	12.7533	35.9167	1.49378	0.000245269	0.0029806
ENSSSCG00000016701	2.92433	11.7734	6.93476	32.8563	67.3379	14.9962	0.07	0.2	0.15	0.77	1.14	0.28	0.14	0.73	2.38247	0.000295635	0.00347721
ENSSSCG00000016704	181.491	290.353	219.335	60.0238	54.8608	76.7315	4.64	5.03	4.63	1.4	0.93	1.42	4.76667	1.25	-1.93105	1.72909e-05	0.000402937
ENSSSCG00000016715	353.727	711.919	843.758	1256.62	2987.45	2170.24	9.04	12.33	17.8	29.27	50.4	40.24	13.0567	39.97	1.61413	1.6176e-05	0.000382644
ENSSSCG00000016716	331.381	247.559	236.978	516.914	2273.58	552.233	8.46	4.29	5	12.04	38.35	10.24	5.91667	20.21	1.77221	0.000748342	0.00685537
ENSSSCG00000016717	58.9564	76.8178	118.589	218.027	544.525	433.042	1.51	1.33	2.5	5.08	9.19	8.03	1.78	7.43333	2.06213	1.51225e-05	0.000361893
ENSSSCG00000016769	822.892	2417.78	2039.95	3092.16	5249.22	4017.18	21.02	41.87	43.04	72.03	88.55	74.49	35.31	78.3567	1.14998	0.00092756	0.00804591
ENSSSCG00000016778	172.717	553.099	458.063	678.633	1459.71	1061.9	4.41	9.58	9.66	15.81	24.62	19.69	7.88333	20.04	1.346	0.0011695	0.00940744
ENSSSCG00000016782	374	846.032	684.395	1185.33	2390.13	1290.93	9.55	14.65	14.44	27.61	40.32	23.94	12.88	30.6233	1.2495	0.000533966	0.00534567
ENSSSCG00000016809	262.43	724.117	656.107	866.815	2093.05	1278.7	6.7	12.54	13.84	20.19	35.31	23.71	11.0267	26.4033	1.25972	0.00136815	0.0104966
ENSSSCG00000016823	221.649	679.368	670.351	177.347	263.657	242.087	5.66	11.76	14.14	4.13	4.45	4.49	10.52	4.35667	-1.27184	0.00471897	0.0256834
ENSSSCG00000016826	51.102	170.36	283.421	383.93	703.715	468.036	1.31	2.95	5.98	8.94	11.87	8.68	3.41333	9.83	1.52601	0.0038874	0.0223165
ENSSSCG00000016832	52.5309	272.703	221.864	544.006	1103.5	897.364	1.34	4.72	4.68	12.67	18.62	16.64	3.58	15.9767	2.15793	1.32311e-05	0.000326683
ENSSSCG00000016834	223.058	562.243	463.571	794.123	1077.9	1600.57	5.7	9.74	9.78	18.5	18.18	29.68	8.40667	22.12	1.39575	0.000381689	0.00426368
ENSSSCG00000016835	262.282	627.487	610.975	723.92	1525.98	1158.47	6.7	10.87	12.89	16.86	25.74	21.48	10.1533	21.36	1.07296	0.00513186	0.027256
ENSSSCG00000016842	450.159	2113.19	2153.74	3331.1	6612.56	6037.39	11.5	36.59	45.44	77.59	111.55	111.95	31.1767	100.363	1.68669	0.000125313	0.00180904
ENSSSCG00000016843	58.9476	213.817	263.959	391.985	452.553	602.234	1.51	3.7	5.57	9.13	7.63	11.17	3.59333	9.31	1.37346	0.00613416	0.0307796
ENSSSCG00000016850	23.3907	150.357	212.499	404.31	1148.67	1053.51	0.6	2.6	4.48	9.42	19.38	19.54	2.56	16.1133	2.65404	1.2939e-05	0.000321382
ENSSSCG00000016851	162.967	445.514	394.104	728.338	1490.57	1093.77	4.16	7.72	8.31	16.97	25.15	20.28	6.73	20.8	1.62791	5.50456e-05	0.000977157
ENSSSCG00000016855	604.948	944.23	908.677	1837.36	3163.7	2863.17	15.45	16.35	19.17	42.8	53.37	53.09	16.99	49.7533	1.55011	1.04883e-06	4.32174e-05
ENSSSCG00000016857	11207.6	22845.4	17521.2	4584.14	5714.09	5564.43	286.27	395.62	369.63	106.78	96.39	103.18	350.507	102.117	-1.77922	7.48576e-08	5.09032e-06
ENSSSCG00000016863	802.186	3146.32	2764.54	3488.34	5243.36	5258.13	20.49	54.49	58.32	81.25	88.45	97.5	44.4333	89.0667	1.00324	0.00899086	0.0405224
ENSSSCG00000016876	85.3509	162.913	118.37	200.954	339.285	297.784	2.18	2.82	2.5	4.68	5.72	5.52	2.5	5.30667	1.08588	0.0102009	0.0446501
ENSSSCG00000016877	1446.92	7230.49	4610.63	6630.76	11314.3	11388.1	36.96	125.21	97.27	154.45	190.87	211.18	86.48	185.5	1.10098	0.00859069	0.0390868
ENSSSCG00000016882	471.76	555.008	704.86	1148.25	2090.98	1742.18	12.05	9.61	14.87	26.75	35.27	32.31	12.1767	31.4433	1.36863	6.70353e-05	0.00113717
ENSSSCG00000016885	84.0527	266.458	387.175	574.174	1062.55	1183.57	2.15	4.61	8.17	13.37	17.92	21.95	4.97667	17.7467	1.8343	0.00016467	0.0022034
ENSSSCG00000016887	69.5189	364.604	467.094	793.814	1169.61	1660.18	1.78	6.31	9.85	18.49	19.73	30.79	5.98	23.0033	1.94363	0.000223203	0.00276372
ENSSSCG00000016894	5.62472	103.989	101.301	123.269	351.895	320.466	0.14	1.8	2.14	2.87	5.94	5.94	1.36	4.91667	1.85407	0.0080294	0.0371857
ENSSSCG00000016902	990.286	2520.03	2999.48	2507.67	4596.5	11329.7	25.29	43.64	63.28	58.41	77.54	210.09	44.07	115.347	1.38811	0.00373672	0.0217187
ENSSSCG00000016916	1234.14	3214.66	2988.8	5273.48	6247.14	5635.35	31.52	55.67	63.05	122.84	105.39	104.5	50.08	110.91	1.14708	0.000856665	0.00756052
ENSSSCG00000016918	1128.09	1443.29	1236.13	2712.06	3348.03	2612.26	28.81	24.99	26.08	63.17	56.48	48.44	26.6267	56.03	1.07333	0.000551025	0.00550318
ENSSSCG00000016929	302.269	860.571	874.723	1185.19	1765.64	1788.9	7.72	14.9	18.45	27.61	29.79	33.17	13.69	30.19	1.14095	0.00249776	0.0163332
ENSSSCG00000016941	73.4734	62.0558	24.0956	248.955	494.892	196.868	1.88	1.07	0.51	5.8	8.35	3.65	1.15333	5.93333	2.36303	2.4303e-05	0.000518742
ENSSSCG00000016948	142.835	409.34	375.18	586.973	952.845	808.357	3.65	7.09	7.91	13.67	16.07	14.99	6.21667	14.91	1.26207	0.00218704	0.0148078
ENSSSCG00000016956	40.9722	234.31	265.856	486.118	1062.95	777.646	1.05	4.06	5.61	11.32	17.93	14.42	3.57333	14.5567	2.02634	0.00017482	0.0023094
ENSSSCG00000016957	229.177	89.9572	290.919	662.156	1213.24	1065.96	5.85	1.56	6.14	15.42	20.47	19.77	4.51667	18.5533	2.03835	4.21669e-05	0.00080976
ENSSSCG00000016968	38.0459	583.49	694.362	1327.98	2602.67	2656.1	0.97	10.1	14.65	30.93	43.91	49.25	8.57333	41.3633	2.27042	0.000455495	0.00480761
ENSSSCG00000016972	38.964	54.9292	46.5699	16.9335	31.1826	9.0055	1	0.95	0.98	0.39	0.53	0.17	0.976667	0.363333	-1.42657	0.00771818	0.0361552
ENSSSCG00000016986	18.2708	99.346	127.806	348.691	711.903	1007.35	0.47	1.72	2.7	8.12	12.01	18.68	1.63	12.9367	2.98852	6.75784e-07	2.99269e-05
ENSSSCG00000016988	684.598	3507.91	2938.22	4461.92	7791.41	4532.74	17.49	60.75	61.99	103.93	131.44	84.05	46.7433	106.473	1.18766	0.00604828	0.0304963
ENSSSCG00000017005	1030.57	1993.97	1643.72	453.398	421.155	520.379	26.32	34.53	34.68	10.56	7.1	9.65	31.8433	9.10333	-1.80652	2.66451e-07	1.42306e-05
ENSSSCG00000017006	833.993	1288.53	1158.02	3292.17	5258.84	3756.61	21.3	22.31	24.43	76.69	88.71	69.66	22.68	78.3533	1.78857	8.78821e-09	9.18996e-07
ENSSSCG00000017008	1302.13	1788.01	1697.22	5620.16	13751.9	8147.94	33.26	30.96	35.81	130.91	231.99	151.09	33.3433	171.33	2.36131	3.30493e-11	8.75033e-09
ENSSSCG00000017022	230.333	898.248	1090.25	1371.65	3037.67	2191.81	5.88	15.56	23	31.95	51.24	40.64	14.8133	41.2767	1.47843	0.000879603	0.00771917
ENSSSCG00000017038	130.269	415.682	457.218	524.025	1085.42	1047.32	3.33	7.2	9.65	12.21	18.31	19.42	6.72667	16.6467	1.30727	0.00354761	0.0209523
ENSSSCG00000017042	1114.82	1835.9	2014.26	2975.18	4620.68	3986.48	28.47	31.79	42.49	69.3	77.95	73.92	34.25	73.7233	1.10602	0.000412141	0.00450366
ENSSSCG00000017046	31.5083	134.517	179.827	406.626	1003.17	610.699	0.8	2.33	3.79	9.47	16.92	11.32	2.30667	12.57	2.4461	9.30301e-06	0.000245268
ENSSSCG00000017052	899.663	1843.48	2072.64	3388.07	6539.35	5169.29	22.98	31.92	43.73	78.92	110.32	95.86	32.8767	95.0333	1.53137	7.18495e-06	0.000195217
ENSSSCG00000017054	1032.14	1577.29	1584.64	4718.18	11405.1	7076.17	26.36	27.31	33.43	109.9	192.4	131.22	29.0333	144.507	2.31535	2.78395e-11	7.69855e-09
ENSSSCG00000017062	555.189	543.771	421.936	1121.54	3671.38	1866.2	14.18	9.42	8.9	26.12	61.93	34.61	10.8333	40.8867	1.91615	1.69485e-06	6.31459e-05
ENSSSCG00000017095	105.833	235.613	191.717	435.635	693.162	728.708	2.7	4.08	4.04	10.15	11.69	13.51	3.60667	11.7833	1.70801	3.87393e-05	0.000762772
ENSSSCG00000017137	4638.94	3877.23	3299.27	1893.54	2254.65	1849.11	118.49	67.14	69.6	44.11	38.03	34.29	85.0767	38.81	-1.13234	0.000702082	0.00657389
ENSSSCG00000017146	168.652	2094.54	3753.98	5554.91	11622.1	31244.2	4.31	36.27	79.2	129.39	196.06	579.38	39.9267	301.61	2.91726	0.000166321	0.0022207
ENSSSCG00000017159	31.9363	148.332	124.322	266.831	402.381	238.149	0.82	2.57	2.62	6.22	6.79	4.42	2.00333	5.81	1.53614	0.00287113	0.0180446
ENSSSCG00000017160	734.068	1494.02	1206.84	2449.33	3716.16	2615.25	18.75	25.87	25.46	57.05	62.69	48.5	23.36	56.08	1.26345	7.76558e-05	0.00127151
ENSSSCG00000017169	256.247	2649.13	2310.89	4072.58	6017	5495.31	6.55	45.88	48.75	94.86	101.5	101.9	33.7267	99.42	1.55965	0.00330113	0.0199124
ENSSSCG00000017194	1087.3	876.293	670.22	426.704	425.179	494.064	27.77	15.17	14.14	9.94	7.17	9.16	19.0267	8.75667	-1.11957	0.00505591	0.0269876
ENSSSCG00000017206	3035.07	5646.38	5755.57	8431.79	14473	9592.11	77.52	97.78	121.42	196.4	244.15	177.87	98.9067	206.14	1.05948	0.00161103	0.0117858
ENSSSCG00000017214	244.574	725.665	709.744	1189.95	1174.67	1455.26	6.25	12.57	14.97	27.72	19.82	26.99	11.2633	24.8433	1.14122	0.00387504	0.0222656
ENSSSCG00000017222	211.756	402.777	67.4086	1044.07	1343.24	713.454	5.41	6.97	1.42	24.32	22.66	13.23	4.6	20.07	2.12533	6.65239e-05	0.00113245
ENSSSCG00000017231	3240.52	1343.72	1243.33	1056.43	841.902	729.276	82.77	23.27	26.23	24.61	14.2	13.52	44.09	17.4433	-1.33778	0.00498675	0.0267018
ENSSSCG00000017239	47104.9	21094.8	18417.7	15727.8	12921	11741.2	1203.17	365.3	388.55	366.35	217.97	217.72	652.34	267.347	-1.28691	0.00599929	0.0303723
ENSSSCG00000017268	182.457	692.63	569.223	1381.63	2586.54	2673.48	4.66	11.99	12.01	32.18	43.63	49.58	9.55333	41.7967	2.12931	2.5291e-07	1.38035e-05
ENSSSCG00000017272	328.909	900.884	921.247	1291.02	3203.54	2290.16	8.4	15.6	19.43	30.07	54.04	42.47	14.4767	42.1933	1.54329	6.96984e-05	0.00117206
ENSSSCG00000017308	844.455	1797.12	1882.59	2651.67	4789.73	4353.37	21.57	31.12	39.72	61.77	80.8	80.73	30.8033	74.4333	1.27286	0.000142457	0.00198293
ENSSSCG00000017310	473.425	2000.75	1739.62	2321.73	3848.53	2898	12.09	34.65	36.7	54.08	64.92	53.74	27.8133	57.58	1.04979	0.00887775	0.0401143
ENSSSCG00000017333	1519.68	1661.02	1534.13	4297.2	6474.78	3499.52	38.82	28.76	32.36	100.1	109.23	64.89	33.3133	91.4067	1.4562	9.70633e-06	0.000253751
ENSSSCG00000017342	129.038	459.844	700.854	984.607	1867.37	1152.58	3.3	7.96	14.79	22.93	31.5	21.37	8.68333	25.2667	1.54091	0.00133404	0.010311
ENSSSCG00000017406	825.386	1921.18	2067.89	3115.89	4351.28	3161.47	21.08	33.27	43.62	72.58	73.4	58.62	32.6567	68.2	1.06239	0.00193699	0.013507
ENSSSCG00000017420	2219.77	2762.96	3244.81	5736.98	8192.17	8405.57	56.7	47.85	68.45	133.63	138.2	155.87	57.6667	142.567	1.30583	6.32543e-05	0.00108272
ENSSSCG00000017471	115.532	252.602	310.724	583.214	1411.01	937.57	2.95	4.37	6.56	13.58	23.8	17.39	4.62667	18.2567	1.98038	5.5423e-06	0.00016002
ENSSSCG00000017473	1739.9	5117.09	7406.81	10097.4	24284	17417.1	44.44	88.61	156.26	235.2	409.66	322.97	96.4367	322.61	1.74214	8.10386e-05	0.00130459
ENSSSCG00000017493	36.8718	53.2935	57.5423	160.795	324.472	259.691	0.94	0.92	1.21	3.75	5.47	4.82	1.02333	4.68	2.19323	1.79234e-06	6.58691e-05
ENSSSCG00000017494	1841.6	1298.45	1603.44	5172.56	9781.58	7248.63	47.04	22.49	33.83	120.49	165.01	134.41	34.4533	139.97	2.0224	2.06317e-08	1.77063e-06
ENSSSCG00000017504	541.44	1495.89	1623.42	2110.6	4123.75	3362.61	13.83	25.9	34.25	49.16	69.57	62.35	24.66	60.36	1.29142	0.000520174	0.00526692
ENSSSCG00000017505	890.83	2037.61	2215.51	2667.92	5067.77	4360.65	22.75	35.29	46.74	62.14	85.49	80.86	34.9267	76.1633	1.12477	0.00108439	0.0089722
ENSSSCG00000017506	308.741	913.457	730.548	1133.55	1579.16	1577.82	7.89	15.82	15.41	26.4	26.64	29.26	13.04	27.4333	1.07299	0.00339936	0.0203081
ENSSSCG00000017514	2126.97	6373.17	7124.12	9422.72	19626.9	14802	54.33	110.37	150.29	219.49	331.1	274.48	104.997	275.023	1.38921	0.000513454	0.00521586
ENSSSCG00000017516	231.094	834.037	787.258	1077.17	1808.46	1130.65	5.9	14.44	16.61	25.09	30.51	20.97	12.3167	25.5233	1.0512	0.0109691	0.0471149
ENSSSCG00000017517	153.869	144.74	274.586	369.828	766.172	532.968	3.93	2.51	5.79	8.61	12.92	9.88	4.07667	10.47	1.3608	0.00249998	0.0163391
ENSSSCG00000017518	186.599	738.101	596.824	1357.18	1689.89	1439.92	4.77	12.78	12.59	31.61	28.51	26.7	10.0467	28.94	1.52635	0.000178247	0.00233485
ENSSSCG00000017540	219.204	284.745	232.642	72.4201	125.575	88.7115	5.6	4.93	4.91	1.69	2.12	1.65	5.14667	1.82	-1.4997	0.000530585	0.00532468
ENSSSCG00000017544	26110.2	22807.5	16185.4	6916.65	7420.32	6479.97	666.91	394.96	341.45	161.11	125.18	120.16	467.773	135.483	-1.78769	1.26763e-06	5.02367e-05
ENSSSCG00000017584	3271.11	4340.52	4513.74	9008.55	15866.4	9269.03	83.55	75.17	95.22	209.84	267.66	171.88	84.6467	216.46	1.35458	4.99994e-05	0.000919007
ENSSSCG00000017592	528.181	1474.63	1263.17	1889.72	3274.66	2667.98	13.49	25.54	26.65	44.02	55.24	49.47	21.8933	49.5767	1.17917	0.000698868	0.00655367
ENSSSCG00000017615	215.639	421.959	351.837	753.953	1085.55	1025.75	5.51	7.31	7.42	17.56	18.31	19.02	6.74667	18.2967	1.43933	0.000102181	0.00155015
ENSSSCG00000017626	2577.03	6001.64	6466.26	9883.14	17004	12993.5	65.82	103.93	136.41	230.21	286.85	240.94	102.053	252.667	1.30791	0.000265488	0.00316147
ENSSSCG00000017672	147.36	1116.23	1252.06	2372.73	4197.55	4882.6	3.76	19.33	26.41	55.27	70.81	90.54	16.5	72.2067	2.12967	6.26268e-05	0.00107493
ENSSSCG00000017673	228.388	535.102	682.315	1010.96	1876.47	1618.38	5.83	9.27	14.39	23.55	31.66	30.01	9.83	28.4067	1.53097	0.000104126	0.00157442
ENSSSCG00000017696	402.766	750.684	683.014	807.105	2363.12	1023.67	10.29	13	14.41	18.8	39.86	18.98	12.5667	25.88	1.04224	0.00776342	0.0362575
ENSSSCG00000017730	0	4.93843	11.9073	48.7089	85.805	103.317	0	0.09	0.25	1.13	1.45	1.92	0.113333	1.5	3.72632	4.72428e-08	3.53566e-06
ENSSSCG00000017732	1461.6	4731.29	3845.99	6475.95	11164.3	9694.5	37.33	81.93	81.14	150.85	188.34	179.77	66.8	172.987	1.37274	0.00023119	0.0028478
ENSSSCG00000017743	1667.74	1967.36	1846.36	4198.33	9364.64	5557.09	42.6	34.07	38.95	97.79	157.98	103.05	38.54	119.607	1.63387	9.13364e-07	3.86595e-05
ENSSSCG00000017744	974.849	1801.46	1925.37	2674.53	5015.5	3726.45	24.9	31.2	40.62	62.3	84.61	69.1	32.24	72.0033	1.15921	0.000367023	0.00413698
ENSSSCG00000017747	232.043	543.693	294.761	669.001	928.183	974.361	5.93	9.42	6.22	15.58	15.66	18.07	7.19	16.4367	1.19285	0.00185552	0.0130896
ENSSSCG00000017748	224.679	1163.63	1127.6	1652.99	3341.61	3565.91	5.74	20.15	23.79	38.5	56.37	66.12	16.56	53.6633	1.69623	0.000231367	0.0028478
ENSSSCG00000017750	511.861	956.189	866.571	1422.36	2493.65	1716.55	13.07	16.56	18.28	33.13	42.07	31.83	15.97	35.6767	1.15962	0.000494598	0.00509594
ENSSSCG00000017755	313.595	494.87	493.213	1059.65	2472.11	2493.69	8.01	8.57	10.4	24.68	41.7	46.24	8.99333	37.54	2.0615	1.79918e-08	1.58904e-06
ENSSSCG00000017763	9438.98	23952.4	8459.19	6308.42	4361.14	7552.71	241.09	414.79	178.46	146.94	73.57	140.05	278.113	120.187	-1.2104	0.00278186	0.017644
ENSSSCG00000017764	826.99	2491.98	1946.24	3629.86	5717.09	4423.72	21.12	43.15	41.06	84.55	96.44	82.03	35.11	87.6733	1.32026	0.000128531	0.00184693
ENSSSCG00000017773	815.488	2660.85	2387.13	3609.98	6302.76	4764.52	20.83	46.08	50.36	84.09	106.32	88.35	39.09	92.92	1.24919	0.000627041	0.00603456
ENSSSCG00000017789	155.639	632.7	660.927	1026.49	1234.41	1042.52	3.98	10.96	13.94	23.91	20.82	19.33	9.62667	21.3533	1.14935	0.00978633	0.0432461
ENSSSCG00000017790	114.492	168.519	219.997	380.551	721.124	808.14	2.92	2.92	4.64	8.86	12.17	14.99	3.49333	12.0067	1.78116	4.11145e-05	0.00079569
ENSSSCG00000017798	609.371	494.756	66.0286	2449.31	11037.8	1060.73	15.56	8.57	1.39	57.05	186.2	19.67	8.50667	87.64	3.36492	2.48207e-05	0.000528884
ENSSSCG00000017817	3792.15	8665.41	8575.21	11161.5	21394.4	14841.3	96.86	150.06	180.91	259.99	360.91	275.21	142.61	298.703	1.06664	0.00251558	0.0163723
ENSSSCG00000017826	595.357	1447.94	1191.03	2066.5	3019.96	2080.85	15.21	25.07	25.13	48.14	50.95	38.59	21.8033	45.8933	1.07374	0.00137077	0.0105036
ENSSSCG00000017832	211.473	397.794	519.138	711.189	1529.5	1393.75	5.4	6.89	10.95	16.57	25.8	25.84	7.74667	22.7367	1.55337	0.000106371	0.0015948
ENSSSCG00000017868	973.116	866.66	909.923	2679.32	2467.85	2186.34	24.86	15.01	19.2	62.41	41.63	40.54	19.69	48.1933	1.29137	0.000176415	0.00231604
ENSSSCG00000017893	169.103	159.282	156.105	295.701	527.263	333.302	4.32	2.76	3.29	6.89	8.89	6.18	3.45667	7.32	1.08246	0.0113379	0.0481366
ENSSSCG00000017896	174.686	208.432	291.441	906.475	1995.02	1453.78	4.46	3.61	6.15	21.11	33.66	26.96	4.74	27.2433	2.52294	1.32009e-10	2.83228e-08
ENSSSCG00000017983	4747.53	8236.27	8110.73	2976.07	3318.36	1853.39	121.26	142.63	171.11	69.32	55.98	34.37	145	53.2233	-1.44592	5.32546e-05	0.000960196
ENSSSCG00000018034	1689.14	1746.43	1615.5	678.444	1065.13	960.419	43.14	30.24	34.08	15.8	17.97	17.81	35.82	17.1933	-1.05892	0.00121691	0.00972785
ENSSSCG00000018055	1738.43	1704.87	1086.29	839.459	770.412	828.88	44.4	29.52	22.92	19.55	13	15.37	32.28	15.9733	-1.01498	0.00510776	0.0272025
ENSSSCG00000018057	67.2946	407.15	444.5	854.838	1211.42	1137.11	1.72	7.05	9.38	19.91	20.44	21.09	6.05	20.48	1.75921	0.000634012	0.00606711
ENSSSCG00000018058	13.1414	162.155	173.211	292.255	566.129	293.183	0.34	2.81	3.65	6.81	9.55	5.44	2.26667	7.26667	1.68072	0.0100219	0.0440526
ENSSSCG00000018091	8165.97	33722.7	24911	34211.1	58791.5	47669.1	208.58	583.98	525.53	796.89	991.78	883.95	439.363	890.873	1.01981	0.0110008	0.0471559
ENSSSCG00000020663	183.328	1528.31	1605.07	3821.74	6445.62	7058.27	4.68	26.47	33.86	89.02	108.73	130.88	21.67	109.543	2.33773	1.28798e-05	0.000320969
ENSSSCG00000020675	78.385	132.256	115.328	215.504	513.851	270.151	2	2.29	2.43	5.02	8.67	5.01	2.24	6.23333	1.47651	0.00100591	0.0085063
ENSSSCG00000020710	347.125	1177.13	913.439	1667.29	1882.54	2282.67	8.87	20.38	19.27	38.84	31.76	42.33	16.1733	37.6433	1.21878	0.00122991	0.0097837
ENSSSCG00000020749	426.835	716.762	598.884	1591.35	2829.25	1482.04	10.9	12.41	12.63	37.07	47.73	27.48	11.98	37.4267	1.64344	2.25623e-06	7.90887e-05
ENSSSCG00000020758	4440.19	6189.87	4226.39	1660.65	3123.1	2200.89	113.41	107.19	89.16	38.68	52.69	40.81	103.253	44.06	-1.22865	9.42313e-05	0.00146577
ENSSSCG00000020783	253.581	831.209	386.942	723.058	1625.93	974.649	6.48	14.39	8.16	16.84	27.43	18.07	9.67667	20.78	1.10261	0.00721153	0.0344493
ENSSSCG00000020785	24011.4	38961.1	32211.6	11246.3	7627.54	9916.57	613.31	674.69	679.55	261.96	128.67	183.89	655.85	191.507	-1.77597	9.90968e-07	4.12428e-05
ENSSSCG00000020790	9606.01	5474.27	4402.5	3298.41	3926.5	2703.98	245.36	94.8	92.88	76.83	66.24	50.14	144.347	64.4033	-1.16433	0.00527232	0.0277298
ENSSSCG00000020803	477.752	1696.45	1196.51	1839.41	2704.85	2666.86	12.2	29.38	25.24	42.85	45.63	49.45	22.2733	45.9767	1.04558	0.00418421	0.0235284
ENSSSCG00000020813	916.474	1523.29	1521.56	705.642	757.035	617.584	23.41	26.38	32.1	16.44	12.77	11.45	27.2967	13.5533	-1.01008	0.00319	0.0194324
ENSSSCG00000020859	135.858	361.032	431.059	80.1798	134.757	109.861	3.47	6.25	9.09	1.87	2.27	2.04	6.27	2.06	-1.60582	0.00079994	0.00719252
ENSSSCG00000020906	1500.73	6710.15	6167.62	6990.42	10196.1	18837.4	38.33	116.2	130.11	162.83	172	349.31	94.88	228.047	1.26515	0.00632102	0.0313283
ENSSSCG00000020915	2491.2	5665.14	5705.2	2380.76	2102.94	2294.66	63.63	98.1	120.36	55.46	35.48	42.55	94.03	44.4967	-1.07942	0.00173456	0.0124552
ENSSSCG00000020931	623.618	1608.9	2043.85	2563.09	6275.1	3941.26	15.93	27.86	43.12	59.7	105.86	73.08	28.97	79.5467	1.45724	0.000216453	0.00270436
ENSSSCG00000021023	609.738	1486.97	1676.86	2075.31	3501.97	2546.09	15.57	25.75	35.38	48.34	59.08	47.21	25.5667	51.5433	1.01152	0.00449302	0.0247614
ENSSSCG00000021038	158.659	1312.62	1456.99	2046.45	3816.65	4092.68	4.05	22.73	30.74	47.67	64.39	75.89	19.1733	62.65	1.70821	0.00145429	0.0109282
ENSSSCG00000021067	1227.9	1834.88	1826.78	609.184	589.012	607.448	31.36	31.77	38.54	14.19	9.94	11.26	33.89	11.7967	-1.52248	6.53109e-06	0.000181347
ENSSSCG00000021068	28.3229	275.989	364.285	723.497	1477.84	989.354	0.72	4.78	7.69	16.85	24.93	18.35	4.39667	20.0433	2.18864	0.000385112	0.00429253
ENSSSCG00000021072	24.373	127.434	122.506	522.712	1087.84	1281.28	0.62	2.21	2.58	12.18	18.35	23.76	1.80333	18.0967	3.32699	7.92669e-10	1.28104e-07
ENSSSCG00000021126	119.355	309.162	226.084	79.1143	93.4012	123.797	3.05	5.35	4.77	1.84	1.58	2.3	4.39	1.90667	-1.20317	0.00787457	0.0366322
ENSSSCG00000021138	552.522	1185.8	1283.72	2030.65	3052.96	2184.55	14.11	20.53	27.08	47.3	51.5	40.51	20.5733	46.4367	1.17449	0.000580806	0.00573296
ENSSSCG00000021176	1275.83	983.251	1303.01	3028.92	7327.29	4930.66	32.59	17.03	27.49	70.55	123.61	91.43	25.7033	95.1967	1.88896	1.56247e-07	8.96009e-06
ENSSSCG00000021205	1103.87	1177.45	974.517	2905.59	5071.07	3563.08	28.2	20.39	20.56	67.68	85.55	66.07	23.05	73.1	1.6651	2.74131e-07	1.45782e-05
ENSSSCG00000021220	19050.4	29063.2	15786.7	8209.79	8119.22	11263.9	486.59	503.29	333.04	191.23	136.97	208.87	440.973	179.023	-1.30054	0.000189407	0.00245009
ENSSSCG00000021222	664.54	919.052	1006.78	393.073	357.954	246.174	16.97	15.92	21.24	9.16	6.04	4.56	18.0433	6.58667	-1.45385	0.000315277	0.0036735
ENSSSCG00000021238	100.817	117.471	128.885	409.318	743.232	350.968	2.58	2.03	2.72	9.53	12.54	6.51	2.44333	9.52667	1.96312	1.05612e-05	0.000273056
ENSSSCG00000021255	5105.86	3289.83	10249.8	439.18	631.364	1075.23	130.42	56.97	216.23	10.23	10.65	19.94	134.54	13.6067	-3.30565	9.88136e-12	3.41566e-09
ENSSSCG00000021285	523.828	1139.33	1016.91	1572.86	2464.38	2005.79	13.38	19.73	21.45	36.64	41.57	37.19	18.1867	38.4667	1.08073	0.00106317	0.00884362
ENSSSCG00000021307	0	41.9782	58.8006	135.15	334.455	214.231	0	0.73	1.24	3.15	5.64	3.97	0.656667	4.25333	2.69536	0.00105246	0.0087721
ENSSSCG00000021309	80.382	270.381	172.092	406.56	546.572	365.971	2.05	4.68	3.63	9.47	9.22	6.79	3.45333	8.49333	1.29834	0.00415048	0.0234272
ENSSSCG00000021310	185.684	475.591	416.431	606.174	1096.71	1091.07	4.74	8.24	8.79	14.12	18.5	20.23	7.25667	17.6167	1.27956	0.001362	0.0104751
ENSSSCG00000021328	768.765	750.645	713.995	286.901	310.668	248.14	19.64	13	15.06	6.68	5.24	4.6	15.9	5.50667	-1.52978	0.000100711	0.00153799
ENSSSCG00000021343	509.73	1396.39	1375.85	2041.17	2814.18	3162.52	13.02	24.18	29.03	47.55	47.47	58.64	22.0767	51.22	1.21418	0.000669698	0.00631821
ENSSSCG00000021353	378.766	954.462	1199.84	1708.77	3137.58	2489.01	9.67	16.53	25.31	39.8	52.93	46.15	17.17	46.2933	1.43091	0.000169968	0.00226454
ENSSSCG00000021374	835.621	547.043	362.689	170.328	261.084	146.514	21.34	9.47	7.65	3.97	4.4	2.72	12.82	3.69667	-1.7941	0.000212335	0.00266092
ENSSSCG00000021380	149.277	521.592	538.838	754.136	1648.36	1721.76	3.81	9.03	11.37	17.57	27.81	31.93	8.07	25.77	1.67505	0.000161671	0.0021844
ENSSSCG00000021384	15.3172	68.9922	154.504	237.279	708.731	554.252	0.39	1.19	3.26	5.53	11.96	10.28	1.61333	9.25667	2.52045	0.000108893	0.00162673
ENSSSCG00000021386	9526.2	8618.47	14079.2	2611.62	2314.72	2734.09	243.32	149.25	297.02	60.83	39.05	50.7	229.863	50.1933	-2.19521	4.23325e-09	5.2157e-07
ENSSSCG00000021411	3021.82	2698.77	3244.39	1144.18	2226.61	1694.16	77.18	46.73	68.44	26.65	37.56	31.42	64.1167	31.8767	-1.0082	0.00229377	0.0153791
ENSSSCG00000021436	322.712	411.338	455.553	659	1318.23	784.273	8.24	7.12	9.61	15.35	22.24	14.54	8.32333	17.3767	1.06192	0.00513155	0.027256
ENSSSCG00000021439	172.02	324.868	258.654	670.484	826.19	700.491	4.39	5.63	5.46	15.62	13.94	12.99	5.16	14.1833	1.45875	0.00013614	0.00191484
ENSSSCG00000021464	261.488	426.194	647.195	1423.35	2712.95	1773.64	6.68	7.38	13.65	33.15	45.77	32.89	9.23667	37.27	2.01257	1.60346e-07	9.15295e-06
ENSSSCG00000021490	416.115	883.013	1491.78	190.559	107.014	520.92	10.63	15.29	31.47	4.44	1.81	9.66	19.13	5.30333	-1.85087	0.00137881	0.0105349
ENSSSCG00000021511	119.761	149.809	183.217	1246.5	4549.55	2484.08	3.06	2.59	3.87	29.04	76.75	46.06	3.17333	50.6167	3.99554	1.15357e-19	3.58877e-16
ENSSSCG00000021562	45.3347	281.529	244.112	438.225	823.774	703.552	1.16	4.88	5.15	10.21	13.9	13.05	3.73	12.3867	1.73154	0.000958983	0.00820177
ENSSSCG00000021591	1436.5	2030.96	1385.56	4136.23	7029.93	4129.18	36.69	35.17	29.23	96.35	118.59	76.57	33.6967	97.17	1.52791	1.88494e-06	6.81865e-05
ENSSSCG00000021597	1379.3	2569.91	1323.35	694.101	688.179	825.001	35.23	44.5	27.92	16.17	11.61	15.3	35.8833	14.36	-1.32126	0.000133099	0.00188643
ENSSSCG00000021598	296.875	454.079	684.387	186.027	218.53	154.111	7.58	7.86	14.44	4.33	3.69	2.86	9.96	3.62667	-1.4575	0.00107858	0.00894793
ENSSSCG00000021657	21.8853	134.572	54.6193	244.647	658.203	322.551	0.56	2.33	1.15	5.7	11.1	5.98	1.34667	7.59333	2.49534	1.09e-05	0.000280826
ENSSSCG00000021704	61.4753	128.158	116.41	219.355	389.231	258.425	1.57	2.22	2.46	5.11	6.57	4.79	2.08333	5.49	1.39791	0.00152386	0.0112908
ENSSSCG00000021706	809.109	1045.69	1083.35	3539.25	6125.77	4366.15	20.67	18.11	22.85	82.44	103.34	80.96	20.5433	88.9133	2.11373	2.68737e-11	7.66093e-09
ENSSSCG00000021712	2377.47	2778.29	4657.81	3487.34	7151.71	22336.7	60.73	48.11	98.26	81.23	120.65	414.2	69.0333	205.36	1.57279	0.00291023	0.0182168
ENSSSCG00000021728	9703.03	19733.2	16127.8	8689.95	8825.77	5857.88	247.84	341.72	340.24	202.42	148.89	108.63	309.933	153.313	-1.01547	0.00391911	0.022464
ENSSSCG00000021734	366.969	309.599	448.031	1614.71	2471.27	1427.99	9.37	5.36	9.45	37.61	41.69	26.48	8.06	35.26	2.12918	1.56271e-08	1.42988e-06
ENSSSCG00000021774	132.72	262.258	222.609	399.269	569.85	402.517	3.39	4.54	4.7	9.3	9.61	7.46	4.21	8.79	1.06204	0.00937427	0.0417813
ENSSSCG00000021784	290.198	984.22	741.621	1004.23	1797.02	1489.67	7.41	17.04	15.65	23.39	30.31	27.62	13.3667	27.1067	1.02001	0.00759094	0.03572
ENSSSCG00000021791	281.349	694.698	744.23	914.664	1344.78	1412.21	7.19	12.03	15.7	21.31	22.69	26.19	11.64	23.3967	1.00721	0.00806711	0.0372933
ENSSSCG00000021793	2026.79	3189.2	2922.2	4732.36	9516.63	6689.04	51.77	55.23	61.65	110.23	160.54	124.04	56.2167	131.603	1.22713	0.000154156	0.00211337
ENSSSCG00000021811	2932.44	3285.56	2503.36	1442.29	928.262	1305.2	74.9	56.9	52.81	33.6	15.66	24.2	61.5367	24.4867	-1.32945	0.000200873	0.00256902
ENSSSCG00000021812	1662.62	461.185	855.28	5082.38	14038.2	9064.94	42.47	7.99	18.04	118.39	236.82	168.1	22.8333	174.437	2.93349	3.20705e-08	2.56664e-06
ENSSSCG00000021813	1375.9	2020.17	191	5086.91	8176.54	2513.39	35.14	34.98	4.03	118.49	137.93	46.61	24.7167	101.01	2.03094	0.000994263	0.00844547
ENSSSCG00000021834	83.9831	177.26	272.787	376.408	749.475	549.797	2.15	3.07	5.75	8.77	12.64	10.2	3.65667	10.5367	1.52682	0.00114428	0.00929762
ENSSSCG00000021837	8228.13	7791.85	5349.07	2550	1998.18	2784.32	210.17	134.93	112.85	59.4	33.71	51.63	152.65	48.2467	-1.66173	8.22058e-06	0.000220467
ENSSSCG00000021845	1434.18	4617.56	4097.3	6168.55	8603.51	7389.22	36.63	79.96	86.44	143.69	145.14	137.02	67.6767	141.95	1.06865	0.00403948	0.0229388
ENSSSCG00000021862	189.03	408.135	473.654	788.814	1577.69	1014.04	4.83	7.07	9.99	18.37	26.61	18.8	7.29667	21.26	1.54283	0.00011582	0.00170843
ENSSSCG00000021885	31.8465	119.09	151.458	393.914	870.557	739.712	0.81	2.06	3.2	9.18	14.69	13.72	2.02333	12.53	2.63058	6.35564e-07	2.88648e-05
ENSSSCG00000021893	1045.2	3074.72	2622.49	4122.48	8022.59	6202	26.7	53.25	55.33	96.03	135.34	115.01	45.0933	115.46	1.35641	0.000157212	0.00214276
ENSSSCG00000021938	318.267	3338.87	2325.39	341.46	305.791	549.462	8.13	57.82	49.06	7.95	5.16	10.19	38.3367	7.76667	-2.30336	4.9792e-05	0.000916585
ENSSSCG00000021956	866.607	2509.54	1804.59	3098.08	4884	5563.81	22.14	43.46	38.07	72.16	82.39	103.17	34.5567	85.9067	1.31381	0.000137273	0.00192585
ENSSSCG00000021966	734.347	2162.82	2928.52	4669.69	13758.6	9145.62	18.76	37.45	61.78	108.77	232.1	169.59	39.33	170.153	2.11313	3.06007e-06	9.89078e-05
ENSSSCG00000021973	434.965	419.499	467.625	238.661	189.737	209.765	11.11	7.26	9.87	5.56	3.2	3.89	9.41333	4.21667	-1.1586	0.00688168	0.0333862
ENSSSCG00000021991	4643.6	4267.04	4548.86	2342.2	2381.81	1959.28	118.61	73.89	95.96	54.56	40.18	36.33	96.1533	43.69	-1.13803	0.000581865	0.00573296
ENSSSCG00000022009	8869.48	23234.4	19026.3	8531.36	5228.15	10136.1	226.55	402.35	401.39	198.72	88.2	187.96	343.43	158.293	-1.11742	0.0047639	0.0258301
ENSSSCG00000022031	1029.3	966.503	864.403	2037.01	4059.5	2074.58	26.29	16.74	18.24	47.45	68.48	38.47	20.4233	51.4667	1.33342	0.000134929	0.00190225
ENSSSCG00000022068	40.4238	26.6686	24.3336	9.20658	7.81853	4.516	1.03	0.46	0.51	0.21	0.13	0.08	0.666667	0.14	-2.25154	0.000282264	0.00333888
ENSSSCG00000022073	479.756	1893.26	2081.2	2797.3	5490.46	4963.57	12.25	32.79	43.91	65.16	92.62	92.04	29.65	83.2733	1.48982	0.000390016	0.00431794
ENSSSCG00000022092	15.6589	24.8452	34.9847	40.2459	134.02	152.469	0.4	0.43	0.74	0.94	2.26	2.83	0.523333	2.01	1.94139	0.000437382	0.00466391
ENSSSCG00000022187	12069.2	12760.5	8493.77	4289.41	4756.37	4659.19	308.27	220.97	179.19	99.91	80.24	86.4	236.143	88.85	-1.41022	3.83992e-05	0.000758475
ENSSSCG00000022192	194.034	1115.89	1055.81	1484.9	2614.33	2104.81	4.96	19.32	22.27	34.59	44.1	39.03	15.5167	39.24	1.33851	0.00383151	0.022084
ENSSSCG00000022202	243.343	133.67	97.4374	436.185	719.877	372.487	6.22	2.31	2.06	10.16	12.14	6.91	3.53	9.73667	1.46376	0.00411801	0.023293
ENSSSCG00000022209	107.967	138.598	144.913	41.7303	23.8868	36.6791	2.76	2.4	3.06	0.97	0.4	0.68	2.74	0.683333	-2.00351	4.93077e-05	0.000909015
ENSSSCG00000022225	1284.33	2598.73	2934	3803.27	6432.26	5203.66	32.8	45	61.9	88.59	108.51	96.49	46.5667	97.8633	1.07147	0.00134648	0.0103814
ENSSSCG00000022240	175.799	639.497	763.813	1213.42	2869.08	1851.44	4.49	11.07	16.11	28.26	48.4	34.33	10.5567	36.9967	1.80924	5.35519e-05	0.000963006
ENSSSCG00000022258	13.4616	14.0997	28.2692	51.8847	108.13	30.4755	0.34	0.24	0.6	1.21	1.82	0.57	0.393333	1.2	1.60921	0.00586421	0.0298818
ENSSSCG00000022280	618.317	1569.09	993.344	504.868	623.891	420.469	15.79	27.17	20.96	11.76	10.52	7.8	21.3067	10.0267	-1.08746	0.00372931	0.021706
ENSSSCG00000022283	136.07	310.946	318.697	742.268	887.866	768.086	3.48	5.38	6.72	17.29	14.98	14.24	5.19333	15.5033	1.57785	9.37627e-05	0.00146046
ENSSSCG00000022292	564.574	834.019	1071.97	1347.28	2431.03	2283.13	14.42	14.44	22.61	31.38	41.01	42.34	17.1567	38.2433	1.15644	0.000728476	0.00672372
ENSSSCG00000022302	62.7748	369.817	289.782	604.153	818.609	615.316	1.6	6.4	6.11	14.07	13.81	11.41	4.70333	13.0967	1.47744	0.00309997	0.0190439
ENSSSCG00000022324	1449.2	1196.88	978.7	560.002	629.538	595.719	37.02	20.73	20.65	13.04	10.62	11.05	26.1333	11.57	-1.1755	0.00137908	0.0105349
ENSSSCG00000022351	38969.7	43210.5	20796.3	8996.19	4345.05	11454.9	995.38	748.28	438.73	209.55	73.3	212.41	727.463	165.087	-2.13965	3.20294e-06	0.000102198
ENSSSCG00000022361	601.861	533.488	529.718	1395.62	2196.13	1626.76	15.37	9.24	11.18	32.51	37.05	30.17	11.93	33.2433	1.47847	1.98288e-05	0.000440624
ENSSSCG00000022419	294.645	840.537	915.002	1180.61	2107.06	1944.64	7.53	14.56	19.3	27.5	35.55	36.06	13.7967	33.0367	1.25975	0.0011649	0.00938253
ENSSSCG00000022478	1423.1	2140.35	2249.5	5316.65	9242.38	6328.86	36.35	37.06	47.46	123.84	155.91	117.36	40.29	132.37	1.71608	1.17106e-07	7.14346e-06
ENSSSCG00000022479	543.888	1825.08	1787.09	4318.11	9062.21	7647.29	13.89	31.61	37.7	100.58	152.88	141.81	27.7333	131.757	2.24818	1.98066e-08	1.71162e-06
ENSSSCG00000022486	681.786	1391.87	1325.3	1781.05	3427.35	2551.22	17.41	24.1	27.96	41.49	57.82	47.31	23.1567	48.8733	1.07762	0.00108084	0.00895718
ENSSSCG00000022496	619.503	1019.78	953.038	1620.76	3330.98	2125.26	15.82	17.66	20.11	37.75	56.19	39.41	17.8633	44.45	1.31518	7.07331e-05	0.00118466
ENSSSCG00000022504	123.862	305.589	223.8	572.572	844.982	584.255	3.16	5.29	4.72	13.34	14.25	10.83	4.39	12.8067	1.5446	0.000159145	0.00216201
ENSSSCG00000022512	60.6082	120.982	80.8513	186.573	238.151	275.693	1.55	2.1	1.71	4.35	4.02	5.11	1.78667	4.49333	1.33052	0.00218397	0.0148078
ENSSSCG00000022635	527.624	448.898	336.477	142.14	275.721	155.799	13.48	7.77	7.1	3.31	4.65	2.89	9.45	3.61667	-1.38565	0.00203829	0.014029
ENSSSCG00000022692	217.062	544.696	422.988	1064.19	1110.45	992.281	5.54	9.43	8.92	24.79	18.73	18.4	7.96333	20.64	1.374	0.000308	0.00359545
ENSSSCG00000022708	748.663	1830.51	1772.04	2635.42	4187.72	3856.15	19.12	31.7	37.38	61.39	70.64	71.51	29.4	67.8467	1.20646	0.000371929	0.00417338
ENSSSCG00000022722	1226.83	817.056	797.72	2270.22	2451.98	1727.16	31.34	14.15	16.83	52.88	41.36	32.03	20.7733	42.09	1.01874	0.00715701	0.0342546
ENSSSCG00000022726	7983.05	5370.95	2282.26	1800.11	1301.84	2640.7	203.91	93.01	48.15	41.93	21.96	48.97	115.023	37.62	-1.61235	0.000766745	0.00695943
ENSSSCG00000022780	76.5226	664.163	415.24	939.281	1004.4	1674.24	1.95	11.5	8.76	21.88	16.94	31.05	7.40333	23.29	1.65346	0.00193747	0.013507
ENSSSCG00000022801	293.761	490.043	427.876	817.954	1638.73	1364.7	7.5	8.49	9.03	19.05	27.64	25.31	8.34	24	1.52492	1.84676e-05	0.000417837
ENSSSCG00000022823	1355.05	2147.19	2786.83	3717.18	8334.57	4425.02	34.61	37.18	58.79	86.59	140.6	82.06	43.5267	103.083	1.24384	0.000451536	0.00477393
ENSSSCG00000022842	865.235	80.5208	104.189	111.901	96.8654	73.262	22.1	1.39	2.2	2.61	1.63	1.36	8.56333	1.86667	-2.19771	0.00756696	0.035695
ENSSSCG00000022849	479.622	848.629	460.729	1286.19	1969.27	1468.9	12.25	14.7	9.72	29.96	33.22	27.24	12.2233	30.14	1.30204	0.000130117	0.00186112
ENSSSCG00000022895	9.14668	200.852	242.045	377.139	808.323	744.01	0.23	3.48	5.11	8.78	13.64	13.8	2.94	12.0733	2.03794	0.00485994	0.0261692
ENSSSCG00000022900	2311.9	4354.24	4933.27	6231.17	12425.9	9153.62	59.05	75.4	104.07	145.14	209.62	169.74	79.5067	174.833	1.13683	0.00111205	0.00913098
ENSSSCG00000022903	63.022	636.951	674.454	1584.02	3201.09	3237.34	1.61	11.03	14.23	36.9	54	60.03	8.95667	50.31	2.48981	1.62049e-05	0.000382644
ENSSSCG00000022925	632.393	1129.65	1451.54	2388.22	4127.55	2834.27	16.15	19.56	30.62	55.63	69.63	52.56	22.11	59.2733	1.42268	3.99516e-05	0.000778024
ENSSSCG00000022940	1109.86	4290.68	4289.32	4790.05	8604.09	7941.04	28.35	74.3	90.49	111.58	145.15	147.25	64.38	134.66	1.06464	0.00950156	0.0422276
ENSSSCG00000022942	325.92	821.244	859.427	1684.11	4061.66	3323.4	8.32	14.22	18.13	39.23	68.52	61.63	13.5567	56.46	2.05823	6.81931e-08	4.76738e-06
ENSSSCG00000022945	987.923	1406.17	1373.44	339.406	493.876	328.828	25.23	24.35	28.97	7.91	8.33	6.1	26.1833	7.44667	-1.81398	3.10096e-07	1.59456e-05
ENSSSCG00000023112	1617.02	3305.44	3356.19	4982.99	10391.8	8146.38	41.3	57.24	70.8	116.07	175.31	151.06	56.4467	147.48	1.38556	7.42405e-05	0.00122672
ENSSSCG00000023122	877.112	4078.48	4038.74	5722.43	10437.4	7144.7	22.4	70.63	85.2	133.29	176.07	132.49	59.41	147.283	1.30982	0.00289049	0.0181296
ENSSSCG00000023142	1224.45	1618.87	1594.67	658.134	829.023	672.106	31.28	28.03	33.64	15.33	13.99	12.46	30.9833	13.9267	-1.15364	0.000411765	0.00450366
ENSSSCG00000023165	1320.21	1514.39	1429.96	3908.49	7207.43	4599.83	33.72	26.22	30.17	91.04	121.59	85.3	30.0367	99.31	1.72521	6.53273e-08	4.61894e-06
ENSSSCG00000023187	204.737	736.15	603.962	812.398	1815.54	1540.06	5.23	12.75	12.74	18.92	30.63	28.56	10.24	26.0367	1.34633	0.00115298	0.00932271
ENSSSCG00000023195	5.42726	34.995	65.966	110.651	162.348	184.018	0.14	0.61	1.39	2.58	2.74	3.41	0.713333	2.91	2.02837	0.001282	0.0100335
ENSSSCG00000023296	322.509	1102.65	1667.1	2509.14	4808.16	4223.91	8.24	19.09	35.17	58.45	81.11	78.33	20.8333	72.63	1.80167	6.02449e-05	0.00104851
ENSSSCG00000023303	83.9935	212.588	310.546	376.546	793.742	548.469	2.15	3.68	6.55	8.77	13.39	10.17	4.12667	10.7767	1.38486	0.00395408	0.0226124
ENSSSCG00000023304	5434.34	10297.6	9908.34	19515	21342	22719.5	138.81	178.32	209.03	454.57	360.03	421.3	175.387	411.967	1.23199	0.000239104	0.002927
ENSSSCG00000023324	54.4951	343.73	419.612	2081.92	4303.02	4873.77	1.39	5.95	8.85	48.49	72.59	90.38	5.39667	70.4867	3.70721	2.36842e-11	7.18846e-09
ENSSSCG00000023331	7786.93	6332.07	4258.51	2418.43	2786.86	2496.85	198.9	109.65	89.84	56.33	47.01	46.3	132.797	49.88	-1.41269	0.000115758	0.00170843
ENSSSCG00000023333	58234.4	73184.6	99876.3	19282.1	27254.8	16329.7	1487.44	1267.35	2107.03	449.14	459.78	302.81	1620.61	403.91	-2.00443	4.19696e-08	3.18457e-06
ENSSSCG00000023357	1031.95	2179.77	2589.68	3297.61	4963.9	4422.3	26.36	37.75	54.63	76.81	83.74	82	39.58	80.85	1.03048	0.00223758	0.0150836
ENSSSCG00000023376	10.594	183.96	164.619	185.88	671.112	580.865	0.27	3.19	3.47	4.33	11.32	10.77	2.31	8.80667	1.9307	0.00618608	0.0309155
ENSSSCG00000023396	30.3915	112.248	65.4687	205.083	211.523	140.664	0.78	1.94	1.38	4.78	3.57	2.61	1.36667	3.65333	1.41855	0.00441714	0.0244297
ENSSSCG00000023409	726.491	1471.72	1413.9	2840.38	3221.52	3786.62	18.56	25.49	29.83	66.16	54.35	70.22	24.6267	63.5767	1.36828	2.87815e-05	0.000599927
ENSSSCG00000023419	2.0046	71.7378	105.405	187.466	292.442	249.202	0.05	1.24	2.22	4.37	4.93	4.62	1.17	4.64	1.98762	0.00892091	0.0402509
ENSSSCG00000023434	274.515	694.269	491.492	866.273	1437.8	1369.7	7.01	12.02	10.37	20.18	24.25	25.4	9.8	23.2767	1.24803	0.000612814	0.00595305
ENSSSCG00000023437	497.494	1121.28	1156.88	1473.25	2972.89	2503.76	12.71	19.42	24.41	34.32	50.15	46.43	18.8467	43.6333	1.21112	0.000599229	0.00585767
ENSSSCG00000023467	371.825	891.277	792.61	244.659	380.744	215.367	9.5	15.43	16.72	5.7	6.42	3.99	13.8833	5.37	-1.37036	0.000947401	0.00813351
ENSSSCG00000023478	5135.62	10913.9	7102.45	1481.71	873.273	5347.93	131.18	189	149.84	34.51	14.73	99.17	156.673	49.47	-1.66313	0.00179503	0.0127645
ENSSSCG00000023479	21.072	82.7472	80.5555	157.681	289.271	252	0.54	1.43	1.7	3.67	4.88	4.67	1.22333	4.40667	1.84887	0.000273771	0.00325077
ENSSSCG00000023498	2281.75	3774.03	2983.59	1174.65	1577.22	1113.07	58.28	65.36	62.94	27.36	26.61	20.64	62.1933	24.87	-1.32235	2.42089e-05	0.000517806
ENSSSCG00000023522	2393.73	3472.12	2531.9	6169.9	11835.2	6659.03	61.14	60.13	53.41	143.72	199.65	123.48	58.2267	155.617	1.41824	2.62099e-05	0.000550938
ENSSSCG00000023527	487.145	546.478	402.888	1035.84	1411.38	781.321	12.44	9.46	8.5	24.13	23.81	14.49	10.1333	20.81	1.03817	0.00588649	0.029923
ENSSSCG00000023531	0	32.7742	44.2011	111.49	254.142	118.747	0	0.57	0.93	2.6	4.29	2.2	0.5	3.03	2.59932	0.00103582	0.0086683
ENSSSCG00000023533	178.839	552.548	467.341	806.175	1051.57	1107.95	4.57	9.57	9.86	18.78	17.74	20.55	8	19.0233	1.2497	0.00190516	0.0133415
ENSSSCG00000023540	254.334	135.011	113.098	58.7179	97.1259	48.8326	6.5	2.34	2.39	1.37	1.64	0.91	3.74333	1.30667	-1.51843	0.00476852	0.0258301
ENSSSCG00000023565	275.946	808.579	900.509	1127.5	2101.95	1825.52	7.05	14	19	26.26	35.46	33.85	13.35	31.8567	1.25476	0.00146942	0.0109969
ENSSSCG00000023592	112.455	266.973	214.819	60.1389	97.8538	101.167	2.87	4.62	4.53	1.4	1.65	1.88	4.00667	1.64333	-1.28578	0.00415533	0.0234402
ENSSSCG00000023630	52.9958	859.286	523.216	1861.96	3888.33	2894.8	1.35	14.88	11.04	43.37	65.59	53.68	9.09	54.2133	2.5763	2.00759e-05	0.000442951
ENSSSCG00000023660	1424.36	2464.76	2435.36	5249.44	9812.06	5581.88	36.38	42.68	51.38	122.28	165.52	103.51	43.48	130.437	1.58493	2.28691e-06	7.99391e-05
ENSSSCG00000023674	2545.43	9364.43	8537.08	12576.8	20106.4	17359.7	65.02	162.17	180.1	292.95	339.19	321.91	135.763	318.017	1.22801	0.00185665	0.0130902
ENSSSCG00000023724	626.056	1168.56	1452.29	2182.63	3404.89	3290.85	15.99	20.24	30.64	50.84	57.44	61.02	22.29	56.4333	1.34015	8.5901e-05	0.00136951
ENSSSCG00000023749	399.168	309.191	217.357	730.297	1353.49	678.15	10.2	5.35	4.59	17.01	22.83	12.58	6.71333	17.4733	1.38005	0.00157522	0.011592
ENSSSCG00000023761	1450.96	4434.78	6360.96	8136.83	16215.8	11720.4	37.06	76.8	134.19	189.53	273.55	217.34	82.6833	226.807	1.45579	0.000721688	0.00668206
ENSSSCG00000023762	77.8423	100.001	141.331	338.728	510.083	290.612	1.99	1.73	2.98	7.89	8.6	5.39	2.23333	7.29333	1.70738	0.000169594	0.00226199
ENSSSCG00000023785	749.163	314.767	522.322	995.883	1203.06	1874.84	19.14	5.45	11.02	23.2	20.3	34.77	11.87	26.09	1.13618	0.0111358	0.0475545
ENSSSCG00000023791	219.608	511.991	278.718	1155.83	1504.04	1177.38	5.61	8.87	5.88	26.92	25.37	21.83	6.78667	24.7067	1.86413	4.92306e-07	2.36022e-05
ENSSSCG00000023803	606.294	1160.74	1101.77	1795.66	3485.76	2333.98	15.49	20.1	23.24	41.83	58.8	43.28	19.61	47.97	1.29054	9.45021e-05	0.00146815
ENSSSCG00000023829	170.017	434.581	459.017	885.186	1968.48	1400.65	4.34	7.53	9.68	20.62	33.21	25.97	7.18333	26.6	1.8887	2.98439e-06	9.74743e-05
ENSSSCG00000023837	923.558	1092.97	1325.62	352.651	477.521	325.355	23.59	18.93	27.97	8.21	8.06	6.03	23.4967	7.43333	-1.66037	6.48903e-06	0.000180648
ENSSSCG00000023842	921.281	1012.42	1194.38	1734.34	3460.66	2924.68	23.53	17.53	25.2	40.4	58.38	54.23	22.0867	51.0033	1.20742	0.00022157	0.00274661
ENSSSCG00000023894	1681.95	1927.6	1893.39	5763.78	9672.62	6024.83	42.96	33.38	39.94	134.26	163.17	111.72	38.76	136.383	1.81503	2.96913e-08	2.41489e-06
ENSSSCG00000023903	13741.3	9332.57	6914.33	3429.31	2399.16	1962.23	350.99	161.61	145.87	79.88	40.47	36.39	219.49	52.2467	-2.07074	2.93016e-06	9.62082e-05
ENSSSCG00000023915	328.158	593.455	474.818	195.063	152.652	156.304	8.38	10.28	10.02	4.54	2.58	2.9	9.56	3.34	-1.51716	0.000412844	0.00450366
ENSSSCG00000023933	1574.04	2712.79	2445.86	1115.98	1100.29	977.436	40.2	46.98	51.6	25.99	18.56	18.13	46.26	20.8933	-1.14672	0.000371678	0.00417338
ENSSSCG00000023934	247.469	709.83	482.928	128.384	159.834	213.258	6.32	12.29	10.19	2.99	2.7	3.95	9.6	3.21333	-1.57896	0.000362098	0.00410004
ENSSSCG00000023993	217.531	389.841	335.499	540.737	1360.61	965.783	5.56	6.75	7.08	12.6	22.95	17.91	6.46333	17.82	1.46315	0.000204289	0.00259415
ENSSSCG00000024065	45.613	630.367	522.13	707.268	1399.63	1428.8	1.17	10.92	11.02	16.47	23.61	26.49	7.70333	22.19	1.52635	0.011216	0.0477985
ENSSSCG00000024125	741.285	1349.67	1588.99	1909.01	3590.2	2535.21	18.93	23.37	33.52	44.47	60.57	47.01	25.2733	50.6833	1.0039	0.0029649	0.0184478
ENSSSCG00000024144	9432.03	7197.11	6244.84	3354.36	4088.05	3660.89	240.92	124.63	131.74	78.13	68.96	67.89	165.763	71.66	-1.20988	0.000730024	0.0067292
ENSSSCG00000024145	111.973	299.222	376.466	584.817	1049.37	630.903	2.86	5.18	7.94	13.62	17.7	11.7	5.32667	14.34	1.42874	0.00144937	0.0108979
ENSSSCG00000024157	303.031	852.052	855.468	1368.49	2069.23	2029.54	7.74	14.76	18.05	31.88	34.91	37.63	13.5167	34.8067	1.36462	0.000254958	0.00307432
ENSSSCG00000024201	1030.34	1906.5	2065.87	3807.08	6135.18	4557.35	26.32	33.02	43.58	88.68	103.5	84.51	34.3067	92.23	1.42675	9.84862e-06	0.000256931
ENSSSCG00000024253	1169.5	3099.65	3325.34	3969.87	8288.68	5443.17	29.87	53.68	70.15	92.47	139.83	100.94	51.2333	111.08	1.11644	0.00246747	0.0162204
ENSSSCG00000024261	269.116	575.581	540.184	826.253	1621.98	1074	6.87	9.97	11.4	19.25	27.36	19.92	9.41333	22.1767	1.23626	0.000883973	0.00774659
ENSSSCG00000024263	40911.9	32711.9	21829	11656.3	15103.2	11364.5	1044.98	566.48	460.51	271.51	254.78	210.74	690.657	245.677	-1.49121	9.50893e-05	0.00147543
ENSSSCG00000024300	546.315	935.972	1394.23	363.369	584.49	431.934	13.95	16.21	29.41	8.46	9.86	8.01	19.8567	8.77667	-1.17788	0.00300745	0.0186285
ENSSSCG00000024310	516.867	434.609	556.635	953.988	2518.67	1375.83	13.2	7.53	11.74	22.22	42.49	25.51	10.8233	30.0733	1.47434	0.000134979	0.00190225
ENSSSCG00000024313	5775.17	3981.61	2834.8	2087.58	2544.87	2143.61	147.51	68.95	59.8	48.63	42.93	39.75	92.0867	43.77	-1.07305	0.00408267	0.0231246
ENSSSCG00000024325	263.255	719.675	498.208	80.4322	115.168	35.4797	6.72	12.46	10.51	1.87	1.94	0.66	9.89667	1.49	-2.73163	1.88065e-07	1.05418e-05
ENSSSCG00000024363	4.86313	62.0275	62.5218	153.797	258.342	167.402	0.12	1.07	1.32	3.58	4.36	3.1	0.836667	3.68	2.13698	0.00081686	0.00729721
ENSSSCG00000024377	381.062	648.954	464.922	1127.22	1222.72	1546.32	9.73	11.24	9.81	26.26	20.63	28.67	10.26	25.1867	1.29563	0.000182396	0.00237669
ENSSSCG00000024388	5562.23	7860.12	4251.24	2822.98	2957.52	2858.19	142.07	136.11	89.69	65.76	49.89	53	122.623	56.2167	-1.12516	0.000662133	0.00627539
ENSSSCG00000024392	13.0371	87.7065	88.5083	191.423	481.986	426.388	0.33	1.52	1.87	4.46	8.13	7.91	1.24	6.83333	2.46225	3.05645e-05	0.000633908
ENSSSCG00000024396	107.257	165.204	115.018	316.03	418.718	344.121	2.74	2.86	2.43	7.36	7.06	6.38	2.67667	6.93333	1.37311	0.000963529	0.00822935
ENSSSCG00000024428	35.8836	31.79	41.7402	55.5988	201.295	70.1586	0.92	0.55	0.88	1.3	3.4	1.3	0.783333	2	1.3523	0.0116052	0.0490376
ENSSSCG00000024479	53.9169	158.183	162.47	284.996	532.321	492.387	1.38	2.74	3.43	6.64	8.98	9.13	2.51667	8.25	1.71288	0.000263653	0.00314262
ENSSSCG00000024480	171.071	382.376	326.959	1127.21	1492.34	1384.5	4.37	6.62	6.9	26.26	25.18	25.67	5.96333	25.7033	2.10776	1.14606e-08	1.13187e-06
ENSSSCG00000024486	181.7	354.793	367.381	693.398	1303.05	1336.83	4.64	6.14	7.75	16.15	21.98	24.79	6.17667	20.9733	1.76366	6.37737e-06	0.000178337
ENSSSCG00000024494	10.9771	30.8152	32.7993	62.5348	60.4399	70.1101	0.28	0.53	0.69	1.46	1.02	1.3	0.5	1.26	1.33342	0.00964382	0.0427168
ENSSSCG00000024549	590.042	383.779	368.453	1328.33	2546.28	1324.86	15.07	6.65	7.77	30.94	42.95	24.57	9.83	32.82	1.73931	1.82501e-05	0.000416705
ENSSSCG00000024550	6937.86	6497.58	6542.15	3076.7	3660.65	3154.36	177.21	112.52	138.02	71.67	61.75	58.49	142.583	63.97	-1.15634	0.000523164	0.00528444
ENSSSCG00000024556	320.167	800.516	676.236	1082.13	1508.74	1314.89	8.18	13.86	14.27	25.21	25.45	24.38	12.1033	25.0133	1.04729	0.00331731	0.0199906
ENSSSCG00000024562	25.5938	110.523	137.95	585.016	835.862	446.898	0.65	1.91	2.91	13.63	14.1	8.29	1.82333	12.0067	2.71919	7.62077e-07	3.32747e-05
ENSSSCG00000024592	652.027	2228.21	2208.46	3054.76	5799.68	5141.26	16.65	38.59	46.59	71.16	97.84	95.34	33.9433	88.1133	1.37623	0.000347828	0.00397099
ENSSSCG00000024598	592.097	1495.98	1278.79	1591.59	3484.59	3701.61	15.12	25.91	26.98	37.07	58.78	68.64	22.67	54.83	1.27418	0.000431946	0.00463374
ENSSSCG00000024623	577.095	1351.19	1484.29	1579.44	3209.88	3848.45	14.74	23.4	31.31	36.79	54.15	71.36	23.15	54.1	1.22462	0.00111486	0.00914526
ENSSSCG00000024634	93.7854	153.23	45.6887	683.607	3775.48	193.926	2.4	2.65	0.96	15.92	63.69	3.6	2.00333	27.7367	3.79132	1.8621e-06	6.75568e-05
ENSSSCG00000024674	12.4451	60.3511	62.8558	290.46	439.662	575.756	0.32	1.05	1.33	6.77	7.42	10.68	0.9	8.29	3.20338	7.98258e-09	8.71362e-07
ENSSSCG00000024777	128.446	367.201	402.407	585.782	921.598	788.302	3.28	6.36	8.49	13.64	15.55	14.62	6.04333	14.6033	1.27288	0.00286983	0.0180446
ENSSSCG00000024793	96.5167	195.096	99.685	284.605	365.008	249.763	2.47	3.38	2.1	6.63	6.16	4.63	2.65	5.80667	1.13172	0.0099675	0.0438443
ENSSSCG00000024813	162.499	1082.67	1061.22	1739.55	2919.43	1946.28	4.15	18.75	22.39	40.52	49.25	36.09	15.0967	41.9533	1.47456	0.00256757	0.0166065
ENSSSCG00000024881	549.284	990.732	657.032	1298.23	2102.97	1644.07	14.03	17.16	13.86	30.24	35.48	30.49	15.0167	32.07	1.09466	0.000813519	0.00728305
ENSSSCG00000024911	1470	2498	1821.47	3358.02	11011.4	1788.22	37.55	43.26	38.43	78.22	185.76	33.16	39.7467	99.0467	1.31727	0.00620031	0.030929
ENSSSCG00000024913	136.756	366.874	379.717	533.058	1066.05	813.636	3.49	6.35	8.01	12.42	17.98	15.09	5.95	15.1633	1.34963	0.00141716	0.0107407
ENSSSCG00000024916	370.489	1353.71	1267.87	1842.58	3224.55	2901.26	9.46	23.44	26.75	42.92	54.4	53.8	19.8833	50.3733	1.3411	0.000594804	0.00583985
ENSSSCG00000024970	668.795	3453.9	2278.37	4337.25	4198.69	5260.75	17.08	59.81	48.07	101.03	70.83	97.55	41.6533	89.8033	1.10834	0.00755175	0.0356638
ENSSSCG00000024999	438.605	1293.29	1103.38	1586.14	2438.31	2334.8	11.2	22.4	23.28	36.95	41.13	43.3	18.96	40.46	1.09354	0.00218503	0.0148078
ENSSSCG00000025005	62.656	107.057	129.105	215.563	394.243	366.969	1.6	1.85	2.72	5.02	6.65	6.8	2.05667	6.15667	1.58184	0.000404657	0.00444836
ENSSSCG00000025034	4787.69	7009.15	7807.48	14223.8	33235.9	19324.7	122.29	121.38	164.71	331.32	560.67	358.35	136.127	416.78	1.61434	5.52008e-06	0.000159748
ENSSSCG00000025042	293.38	311.4	304.048	1259.99	2087.55	2320.39	7.49	5.39	6.41	29.35	35.22	43.03	6.43	35.8667	2.47975	3.91465e-12	1.47618e-09
ENSSSCG00000025097	1101.91	1442.59	604.495	2296.79	2810.57	1900.68	28.15	24.98	12.75	53.5	47.41	35.25	21.96	45.3867	1.04739	0.00422511	0.0236742
ENSSSCG00000025114	1333.66	1496.3	1477.84	3066.69	6017.33	3236.96	34.06	25.91	31.18	71.43	101.51	60.02	30.3833	77.6533	1.35377	3.89044e-05	0.000763778
ENSSSCG00000025126	290.301	495.798	399.886	177.51	236.832	165.308	7.41	8.59	8.44	4.13	4	3.07	8.14667	3.73333	-1.12575	0.00580974	0.0296905
ENSSSCG00000025130	91.8397	154.456	97.6773	283.507	474.599	507.466	2.35	2.67	2.06	6.6	8.01	9.41	2.36	8.00667	1.76241	3.86904e-05	0.000762772
ENSSSCG00000025133	2437.5	2942.7	2914.13	6546.33	11529.1	5720.03	62.26	50.96	61.48	152.49	194.49	106.07	58.2333	151.017	1.37479	7.4049e-05	0.00122535
ENSSSCG00000025134	277.328	568.026	432.273	824.616	1310.06	893.813	7.08	9.84	9.12	19.21	22.1	16.57	8.68	19.2933	1.15234	0.00159429	0.0116771
ENSSSCG00000025139	256.801	860.458	715.828	970.1	1706.5	1568.93	6.56	14.9	15.1	22.6	28.79	29.09	12.1867	26.8267	1.13836	0.00333308	0.0200468
ENSSSCG00000025156	147.275	399.827	422.825	602.596	1061.41	1231.47	3.76	6.92	8.92	14.04	17.91	22.84	6.53333	18.2633	1.48306	0.000526181	0.00529328
ENSSSCG00000025182	66.8928	309.663	432.883	1342.55	3468.27	3132.65	1.71	5.36	9.13	31.27	58.51	58.09	5.4	49.29	3.19026	1.63866e-09	2.34385e-07
ENSSSCG00000025194	355.171	796.462	722.141	1002.86	1604.93	1490.69	9.07	13.79	15.23	23.36	27.07	27.64	12.6967	26.0233	1.03536	0.00312141	0.0191061
ENSSSCG00000025221	238.887	805.735	948.894	1155.03	1965.17	1275.9	6.1	13.95	20.02	26.9	33.15	23.66	13.3567	27.9033	1.06288	0.0116381	0.0491429
ENSSSCG00000025240	216.897	535.297	279.688	105.799	144.639	179.531	5.54	9.27	5.9	2.46	2.44	3.33	6.90333	2.74333	-1.33136	0.0026043	0.0167819
ENSSSCG00000025286	88.735	220.815	204.307	303.263	509.595	382.477	2.27	3.82	4.31	7.06	8.6	7.09	3.46667	7.58333	1.12928	0.00929284	0.0415523
ENSSSCG00000025293	367.273	1093.68	1250.99	1725.03	3214.19	2429.94	9.38	18.94	26.39	40.18	54.22	45.06	18.2367	46.4867	1.34997	0.000517104	0.0052401
ENSSSCG00000025323	2570.54	5106.34	5117.78	6146.22	13562.3	8450.23	65.66	88.43	107.97	143.17	228.79	156.7	87.3533	176.22	1.01244	0.00386681	0.0222462
ENSSSCG00000025406	106.609	801.64	874.456	1227.62	1780.96	2047.35	2.72	13.88	18.45	28.6	30.04	37.96	11.6833	32.2	1.46261	0.00511182	0.0272076
ENSSSCG00000025414	2116.29	944.489	621.468	315.016	737.663	500.631	54.06	16.36	13.11	7.34	12.44	9.28	27.8433	9.68667	-1.52326	0.00244355	0.0161142
ENSSSCG00000025478	410.784	1222.12	1341.28	2058.68	3573.24	3531.8	10.49	21.16	28.3	47.95	60.28	65.49	19.9833	57.9067	1.53493	6.11615e-05	0.0010615
ENSSSCG00000025485	51.0277	8.95932	55.6803	596.368	1413.68	993.044	1.3	0.16	1.17	13.89	23.85	18.41	0.876667	18.7167	4.41615	7.36487e-12	2.69554e-09
ENSSSCG00000025488	1347.34	2239.8	2862.92	3302.91	7848.72	4429.37	34.41	38.79	60.4	76.94	132.4	82.14	44.5333	97.16	1.12548	0.00149174	0.0111024
ENSSSCG00000025503	522.895	422.476	285.077	1284.84	1351.1	724.313	13.36	7.32	6.01	29.93	22.79	13.43	8.89667	22.05	1.30944	0.00260607	0.0167819
ENSSSCG00000025542	109.598	229.424	260.612	456.114	761.174	689.057	2.8	3.97	5.5	10.62	12.84	12.78	4.09	12.08	1.56245	0.000212086	0.00266092
ENSSSCG00000025560	222.448	330.266	254.205	88.7666	113.678	65.9514	5.68	5.72	5.36	2.07	1.92	1.22	5.58667	1.73667	-1.68567	0.000155444	0.002128
ENSSSCG00000025578	608.461	825.899	513.825	2340.48	4563.67	2562.75	15.54	14.3	10.84	54.52	76.99	47.52	13.56	59.6767	2.13781	5.09611e-10	8.93183e-08
ENSSSCG00000025606	439.703	936.423	1051.39	1450.33	2317.33	2407.83	11.23	16.22	22.18	33.78	39.09	44.65	16.5433	39.1733	1.24362	0.000414439	0.00451205
ENSSSCG00000025618	3745.91	5886.45	10574.3	9119.7	19239.3	19208.2	95.68	101.94	223.08	212.43	324.56	356.19	140.233	297.727	1.08616	0.00670568	0.0327237
ENSSSCG00000025703	55.898	869.315	884.51	1474.63	2536.08	2750.07	1.43	15.05	18.66	34.35	42.78	51	11.7133	42.71	1.86642	0.00265385	0.0170054
ENSSSCG00000025717	232.399	1004.4	925.28	1583.33	2586.82	1329.19	5.94	17.39	19.52	36.88	43.64	24.65	14.2833	35.0567	1.29536	0.00317528	0.0193787
ENSSSCG00000025729	58.3348	193.366	214.336	382.406	589.399	570.18	1.49	3.35	4.52	8.91	9.94	10.57	3.12	9.80667	1.65222	0.0005245	0.00528659
ENSSSCG00000025770	1329.6	2051.87	1934.58	6329.8	15313.9	7792.78	33.96	35.53	40.81	147.44	258.34	144.5	36.7667	183.427	2.31873	1.88082e-10	3.90082e-08
ENSSSCG00000025795	72.578	178.111	110.459	302.833	476.153	291.653	1.85	3.08	2.33	7.05	8.03	5.41	2.42	6.83	1.49688	0.000718572	0.00666361
ENSSSCG00000025820	573.36	1343.68	964.79	1662.43	2821.41	2366.38	14.64	23.27	20.35	38.72	47.6	43.88	19.42	43.4	1.16015	0.000438225	0.00466514
ENSSSCG00000025842	4024.32	3507.82	3018.13	1487.7	1989.69	1434.56	102.79	60.75	63.67	34.65	33.57	26.6	75.7367	31.6067	-1.26076	0.000156445	0.00213699
ENSSSCG00000025855	630.463	1299.18	1570.05	2521.37	3496.98	3726	16.1	22.5	33.12	58.73	58.99	69.09	23.9067	62.27	1.38112	6.86002e-05	0.00115516
ENSSSCG00000025965	71.5097	236.568	298.885	406.085	730.671	565.726	1.83	4.1	6.31	9.46	12.33	10.49	4.08	10.76	1.39904	0.00398557	0.0227298
ENSSSCG00000025980	349.581	1228.72	1117.92	1347.76	2262.5	3414.2	8.93	21.28	23.58	31.39	38.17	63.31	17.93	44.29	1.30461	0.00180477	0.0128188
ENSSSCG00000025984	249.319	714.71	639.287	756.144	1721.26	1136.31	6.37	12.38	13.49	17.61	29.04	21.07	10.7467	22.5733	1.07073	0.00711081	0.0341224
ENSSSCG00000026034	616.68	1616.45	1881.91	2772.39	6613.13	4851.38	15.75	27.99	39.7	64.58	111.56	89.96	27.8133	88.7	1.67316	1.28965e-05	0.000320969
ENSSSCG00000026108	7622.38	7986.16	4610.68	2001.32	1769.23	1148.7	194.69	138.3	97.27	46.62	29.85	21.3	143.42	32.59	-2.13774	5.9337e-08	4.27014e-06
ENSSSCG00000026210	262.816	283.268	213.033	1388.01	1110.99	1091.42	6.71	4.91	4.49	32.33	18.74	20.24	5.37	23.77	2.14615	6.74562e-08	4.74252e-06
ENSSSCG00000026224	467.325	896.626	1063.39	1628.67	3021.34	2292.28	11.94	15.53	22.43	37.94	50.97	42.51	16.6333	43.8067	1.39707	6.23233e-05	0.00107493
ENSSSCG00000026233	37.3354	148	143.318	238.824	454.595	413.217	0.95	2.56	3.02	5.56	7.67	7.66	2.17667	6.96333	1.67766	0.000810167	0.00725825
ENSSSCG00000026269	503.204	875.172	710.601	1130.26	2133.56	1544.15	12.85	15.16	14.99	26.33	35.99	28.63	14.3333	30.3167	1.08074	0.00111239	0.00913098
ENSSSCG00000026276	81.0769	440.693	476.99	679.02	1213.52	1130.05	2.07	7.63	10.06	15.82	20.47	20.96	6.58667	19.0833	1.53469	0.00230388	0.0154303
ENSSSCG00000026302	2108.89	4367.79	6296.85	11050	25316	17155.4	53.87	75.64	132.84	257.39	427.07	318.12	87.45	334.193	1.93415	1.38592e-06	5.33945e-05
ENSSSCG00000026330	10458.7	5587.61	10633.2	2044.48	3377.35	3603.2	267.14	96.76	224.32	47.62	56.97	66.82	196.073	57.1367	-1.7789	9.95955e-06	0.000259282
ENSSSCG00000026344	372.17	840.222	968.937	1820	3367.47	2916.95	9.51	14.55	20.44	42.39	56.81	54.09	14.8333	51.0967	1.78439	8.11375e-07	3.50582e-05
ENSSSCG00000026360	56.6264	38.0423	70.6791	302.14	815.592	598.012	1.45	0.66	1.49	7.04	13.76	11.09	1.2	10.63	3.14704	6.22428e-10	1.06103e-07
ENSSSCG00000026382	671.753	1749.89	1727.18	2108.74	3648.95	3294.29	17.16	30.3	36.44	49.12	61.56	61.09	27.9667	57.2567	1.03374	0.00321176	0.0195343
ENSSSCG00000026387	21483	28200.8	16979.1	11248.1	8353.86	13471.9	548.72	488.36	358.2	262	140.93	249.82	465.093	217.583	-1.09595	0.00253572	0.0164616
ENSSSCG00000026414	15165	9435.53	7332.03	3067.24	2801.81	3549.37	387.35	163.4	154.68	71.45	47.27	65.82	235.143	61.5133	-1.93457	2.86828e-06	9.54355e-05
ENSSSCG00000026455	6692.03	8570.12	4484.99	2890.76	3454.34	2636.46	170.93	148.41	94.62	67.34	58.27	48.89	137.987	58.1667	-1.24626	0.000303836	0.00355686
ENSSSCG00000026466	749.455	1641.4	1267.82	2279	3711.92	1958.53	19.14	28.42	26.75	53.09	62.62	36.32	24.77	50.6767	1.03273	0.00235593	0.0156776
ENSSSCG00000026478	181.471	351.739	217.042	609.957	2001.76	1409.94	4.64	6.09	4.58	14.21	33.77	26.15	5.10333	24.71	2.27558	5.32787e-08	3.9e-06
ENSSSCG00000026512	326.443	425.011	402.083	113.968	44.2761	164.362	8.34	7.36	8.48	2.65	0.75	3.05	8.06	2.15	-1.90644	0.000308807	0.0036015
ENSSSCG00000026554	1182.81	1161.03	793.298	365.45	525.442	459.344	30.21	20.11	16.74	8.51	8.86	8.52	22.3533	8.63	-1.37306	0.000233021	0.0028625
ENSSSCG00000026571	4556.34	6702.8	5892.77	9624.66	16892.1	19059.9	116.38	116.07	124.32	224.19	284.96	353.44	118.923	287.53	1.27368	0.000123609	0.00179276
ENSSSCG00000026585	413.123	435.701	273.182	746.617	1600.26	850.334	10.55	7.55	5.76	17.39	27	15.77	7.95333	20.0533	1.33421	0.0008835	0.00774659
ENSSSCG00000026644	1068.3	2587.34	3026.79	3878	7666.59	6003.67	27.29	44.81	63.85	90.33	129.33	111.33	45.3167	110.33	1.28371	0.000407323	0.00446977
ENSSSCG00000026695	51.0999	168.82	142.194	273.445	389.416	268.059	1.31	2.92	3	6.37	6.57	4.97	2.41	5.97	1.3087	0.00523333	0.027583
ENSSSCG00000026714	158.38	348.994	330.439	504.111	976.672	835.237	4.05	6.04	6.97	11.74	16.48	15.49	5.68667	14.57	1.35735	0.00067948	0.00640079
ENSSSCG00000026729	384.651	934.364	692.742	1034.13	2030.99	1367.42	9.82	16.18	14.61	24.09	34.26	25.36	13.5367	27.9033	1.04356	0.00314944	0.0192494
ENSSSCG00000026742	764.956	703.692	865.111	2500.58	6226.95	3916.88	19.54	12.19	18.25	58.25	105.05	72.63	16.66	78.6433	2.23894	4.80398e-10	8.66387e-08
ENSSSCG00000026748	937.295	1983.63	2282.79	2877.33	5605.77	3513.76	23.94	34.35	48.16	67.02	94.57	65.16	35.4833	75.5833	1.09093	0.00166101	0.0120733
ENSSSCG00000026806	4041.41	15007.8	13545.2	17655.7	33916.2	28649.6	103.23	259.89	285.76	411.26	572.15	531.26	216.293	504.89	1.22298	0.00245669	0.0161666
ENSSSCG00000026817	294.147	529.058	455.982	876.618	1136.57	864.533	7.51	9.16	9.62	20.42	19.17	16.03	8.76333	18.54	1.08109	0.00278746	0.0176698
ENSSSCG00000026829	428.888	952.782	971.655	1467.7	2200.16	2718.09	10.95	16.5	20.5	34.19	37.12	50.4	15.9833	40.57	1.34384	0.000147723	0.00204248
ENSSSCG00000026890	541.383	675.848	656.085	1068.71	2319.91	1231.07	13.83	11.7	13.84	24.89	39.14	22.83	13.1233	28.9533	1.1416	0.00119903	0.00961624
ENSSSCG00000026894	93.8038	222.397	278.822	449.212	936.718	813.832	2.4	3.85	5.88	10.46	15.8	15.09	4.04333	13.7833	1.76931	7.43289e-05	0.00122672
ENSSSCG00000026959	185.07	457.577	629.875	694.669	1349.24	1124.09	4.73	7.92	13.29	16.18	22.76	20.84	8.64667	19.9267	1.20448	0.0046993	0.025637
ENSSSCG00000026960	226.785	558.089	526.699	857.725	1118.11	1048.52	5.79	9.66	11.11	19.98	18.86	19.44	8.85333	19.4267	1.13375	0.00289691	0.0181608
ENSSSCG00000026977	355.752	616.056	988.694	1088.53	1919.75	1425.53	9.09	10.67	20.86	25.36	32.39	26.43	13.54	28.06	1.05129	0.00634363	0.0314127
ENSSSCG00000026978	1352.5	5630.91	3121.58	5970.88	5386.04	13245.3	34.55	97.51	65.85	139.08	90.86	245.61	65.97	158.517	1.26475	0.00482315	0.0260274
ENSSSCG00000027072	12530.7	11657.5	11152.8	6588.04	6641.68	5825.32	320.06	201.87	235.28	153.46	112.04	108.02	252.403	124.507	-1.01951	0.00301469	0.0186641
ENSSSCG00000027089	281.338	1761.9	1832.11	2701.72	3993.17	3183.73	7.19	30.51	38.65	62.93	67.36	59.04	25.45	63.11	1.3102	0.00571231	0.0293736
ENSSSCG00000027093	1256.83	2038.4	6161.41	738.543	228.816	546.887	32.1	35.3	129.98	17.2	3.86	10.14	65.7933	10.4	-2.66136	7.61347e-06	0.000205961
ENSSSCG00000027115	741.962	2067.33	1932.2	3137.31	4608.31	4415.47	18.95	35.8	40.76	73.08	77.74	81.88	31.8367	77.5667	1.28475	0.000211774	0.00266092
ENSSSCG00000027130	606.24	510.732	335.984	178.416	155.088	201.717	15.48	8.84	7.09	4.16	2.62	3.74	10.47	3.50667	-1.57809	0.000570319	0.00564514
ENSSSCG00000027166	555.5	1191.24	1238.37	1798.52	2807.31	2533.51	14.19	20.63	26.13	41.89	47.36	46.98	20.3167	45.41	1.16035	0.000558618	0.00556855
ENSSSCG00000027196	563.589	1033	1230.29	1996.7	3659.22	2317.4	14.4	17.89	25.95	46.51	61.73	42.97	19.4133	50.4033	1.37647	6.71662e-05	0.00113717
ENSSSCG00000027207	322.633	598.906	496.248	770.576	1135.72	1272.26	8.24	10.37	10.47	17.95	19.16	23.59	9.69333	20.2333	1.06167	0.00284512	0.0179446
ENSSSCG00000027211	312.803	828.926	758.832	1091.02	1635.26	1498.27	7.99	14.35	16.01	25.41	27.59	27.78	12.7833	26.9267	1.07477	0.0030979	0.0190439
ENSSSCG00000027272	97.0856	390.463	555.496	796.466	1842.37	1389.11	2.48	6.76	11.72	18.55	31.08	25.76	6.98667	25.13	1.84673	0.000197111	0.00253045
ENSSSCG00000027342	513.628	2847.01	3105.61	4561.6	7941.54	6138.75	13.12	49.3	65.52	106.25	133.97	113.83	42.6467	118.017	1.46849	0.00164856	0.0119969
ENSSSCG00000027348	2442.22	3418.27	3652.61	8191.84	18979	12364.5	62.38	59.19	77.06	190.81	320.17	229.28	66.21	246.753	1.89795	4.58309e-08	3.45648e-06
ENSSSCG00000027372	2025.54	2162.61	3106.9	3722.27	5962.24	15271.2	51.74	37.45	65.54	86.7	100.58	283.18	51.5767	156.82	1.60432	0.000433649	0.00464191
ENSSSCG00000027403	295.469	651.563	663.339	960.709	1720.46	1309.15	7.55	11.28	13.99	22.38	29.02	24.28	10.94	25.2267	1.20534	0.000944339	0.00813351
ENSSSCG00000027404	869.07	1855.16	1231.85	3107.67	3967.36	2827.99	22.2	32.13	25.99	72.39	66.93	52.44	26.7733	63.92	1.25547	0.000102428	0.00155063
ENSSSCG00000027410	226.558	680.204	633.546	961.946	1432.81	883.362	5.79	11.78	13.37	22.41	24.17	16.38	10.3133	20.9867	1.02496	0.0110502	0.0473187
ENSSSCG00000027428	647.004	712.442	362.12	270.721	328.491	216.297	16.53	12.34	7.64	6.31	5.54	4.01	12.17	5.28667	-1.2029	0.00538692	0.0281422
ENSSSCG00000027455	266.813	596.134	755.538	1102.2	2296.68	1418.92	6.82	10.32	15.94	25.67	38.74	26.31	11.0267	30.24	1.45546	0.000203287	0.00259104
ENSSSCG00000027466	3454.01	4058.95	3461.1	1686.6	2348.45	1895.12	88.22	70.29	73.02	39.29	39.62	35.14	77.1767	38.0167	-1.02153	0.000779432	0.00704887
ENSSSCG00000027486	900.875	821.106	666.592	377.844	430.199	340.309	23.01	14.22	14.06	8.8	7.26	6.31	17.0967	7.45667	-1.19711	0.00226937	0.015232
ENSSSCG00000027489	857.836	3431.15	2910.47	782.81	1396.23	1471.1	21.91	59.42	61.4	18.23	23.55	27.28	47.5767	23.02	-1.04737	0.00866938	0.0393613
ENSSSCG00000027503	524.122	1239.28	1261.7	2370.43	4706.46	3558.91	13.39	21.46	26.62	55.22	79.4	65.99	20.49	66.87	1.70644	1.35446e-06	5.23442e-05
ENSSSCG00000027528	94.6201	199.492	289.664	483.612	647.639	446.046	2.42	3.45	6.11	11.26	10.93	8.27	3.99333	10.1533	1.34629	0.0033445	0.0200899
ENSSSCG00000027565	4766.59	4068.97	3589.88	10210.5	19103.5	9731.01	121.75	70.46	75.73	237.83	322.27	180.45	89.3133	246.85	1.46669	6.75797e-05	0.00114261
ENSSSCG00000027568	684.916	193.938	230.302	870.966	2423.47	1987.99	17.49	3.36	4.86	20.29	40.88	36.86	8.57	32.6767	1.93089	0.000405201	0.00445042
ENSSSCG00000027587	142.521	276.228	318.492	406.103	711.416	557.796	3.64	4.78	6.72	9.46	12	10.34	5.04667	10.6	1.07066	0.0100865	0.0442895
ENSSSCG00000027628	941.42	1077.68	827.335	2524.07	4544.72	3338.67	24.05	18.66	17.45	58.79	76.67	61.91	20.0533	65.79	1.71403	1.23755e-07	7.40389e-06
ENSSSCG00000027660	2380.29	2690.68	3713.8	3773.48	5043.56	14113.1	60.8	46.59	78.35	87.9	85.08	261.71	61.9133	144.897	1.2267	0.00619044	0.0309168
ENSSSCG00000027686	593.938	1988.85	2094.7	2393.91	4478.77	3280.57	15.17	34.44	44.19	55.76	75.55	60.83	31.2667	64.0467	1.0345	0.00768886	0.0360513
ENSSSCG00000027700	473.925	839.713	799.224	1424.55	2001.78	2208.39	12.11	14.54	16.86	33.18	33.77	40.95	14.5033	35.9667	1.31028	8.16622e-05	0.00131123
ENSSSCG00000027701	92.4266	224.04	239.861	383.103	619.03	553.508	2.36	3.88	5.06	8.92	10.44	10.26	3.76667	9.87333	1.39025	0.0014339	0.0108208
ENSSSCG00000027745	267.592	472.276	335.314	906.179	1648.92	764.943	6.83	8.18	7.07	21.11	27.82	14.18	7.36	21.0367	1.51513	8.98763e-05	0.00141393
ENSSSCG00000027765	311.998	818.915	824.082	1053.87	1738.39	1449.88	7.97	14.18	17.39	24.55	29.33	26.89	13.18	26.9233	1.03051	0.00543149	0.0282683
ENSSSCG00000027790	538.852	1449.02	1310.76	1974.01	3559.97	2283.95	13.76	25.09	27.65	45.98	60.06	42.35	22.1667	49.4633	1.15797	0.00104693	0.00873192
ENSSSCG00000027806	53.9988	815.768	841.65	3045.69	6137.89	6069.22	1.38	14.13	17.76	70.94	103.54	112.54	11.09	95.6733	3.10886	1.26637e-06	5.02367e-05
ENSSSCG00000027812	486.64	702.253	608.23	1261.51	2175.53	1398.21	12.43	12.16	12.83	29.38	36.7	25.93	12.4733	30.67	1.29798	0.000100728	0.00153799
ENSSSCG00000027826	1796.84	4024.06	3253.34	6695.87	9927.83	9234	45.9	69.69	68.63	155.97	167.48	171.23	61.4067	164.893	1.42507	1.94035e-05	0.000433495
ENSSSCG00000027849	311.478	123.026	178.747	540.608	1484.29	825.509	7.96	2.13	3.77	12.59	25.04	15.31	4.62	17.6467	1.93343	0.000138786	0.00194269
ENSSSCG00000027854	196.972	320.924	150.511	524.944	1440.24	1631.61	5.03	5.56	3.18	12.23	24.3	30.26	4.59	22.2633	2.2781	3.41326e-07	1.73366e-05
ENSSSCG00000027855	234.107	420.005	644.931	564.853	1102.04	1584.15	5.98	7.27	13.61	13.16	18.59	29.38	8.95333	20.3767	1.18642	0.00700855	0.0337909
ENSSSCG00000027857	517.632	1130.66	989.205	1727.21	3068.65	3090.49	13.22	19.58	20.87	40.23	51.77	57.31	17.89	49.77	1.47612	1.12267e-05	0.00028746
ENSSSCG00000027859	1511.24	2363.5	1966.12	4213.44	6340.53	4138.97	38.6	40.93	41.48	98.14	106.96	76.75	40.3367	93.95	1.2198	7.31546e-05	0.00121703
ENSSSCG00000027860	1532.43	3496.27	3923.74	3819.88	8086.44	8389.31	39.14	60.55	82.78	88.98	136.41	155.57	60.8233	126.987	1.06198	0.00425561	0.0238063
ENSSSCG00000027872	79.4217	108.743	163.207	1269	3605.34	2838.19	2.03	1.88	3.44	29.56	60.82	52.63	2.45	47.67	4.28223	2.73748e-22	3.40653e-18
ENSSSCG00000027877	80.6195	285.799	228.873	497.562	780.919	456.723	2.06	4.95	4.83	11.59	13.17	8.47	3.94667	11.0767	1.48882	0.00129342	0.0100911
ENSSSCG00000027954	116.571	331.192	235.147	51.0992	118.466	70.3979	2.98	5.74	4.96	1.19	2	1.31	4.56	1.5	-1.60407	0.000736522	0.00677404
ENSSSCG00000027984	185.172	279.103	357.377	619.028	1436.71	827.361	4.73	4.83	7.54	14.42	24.24	15.34	5.7	18	1.65896	5.43626e-05	0.00096918
ENSSSCG00000028018	574.482	1385.28	1236.97	2598.87	4702.53	3674.13	14.67	23.99	26.1	60.54	79.33	68.13	21.5867	69.3333	1.68341	7.78376e-07	3.38675e-05
ENSSSCG00000028060	68.4239	126.36	112.519	343.499	586.368	373.489	1.75	2.19	2.37	8	9.89	6.93	2.10333	8.27333	1.97579	5.25959e-06	0.000152921
ENSSSCG00000028065	277.604	514.109	598.428	780.393	1203.29	1018.51	7.09	8.9	12.62	18.18	20.3	18.89	9.53667	19.1233	1.00378	0.00698323	0.0337211
ENSSSCG00000028109	164.278	367.968	385.384	450.546	1043.71	1140.37	4.2	6.37	8.13	10.49	17.61	21.15	6.23333	16.4167	1.39709	0.00107382	0.00891432
ENSSSCG00000028169	409.655	904.745	1270.31	1746.34	3920.95	2485.13	10.46	15.67	26.8	40.68	66.14	46.08	17.6433	50.9667	1.53043	9.23282e-05	0.0014452
ENSSSCG00000028172	984.721	701.721	641.089	1690.09	2593.57	1581.5	25.15	12.15	13.52	39.37	43.75	29.33	16.94	37.4833	1.14582	0.00209615	0.0143558
ENSSSCG00000028182	449.213	908.496	805.913	1351.14	1938.83	1676.05	11.47	15.73	17	31.47	32.71	31.08	14.7333	31.7533	1.10782	0.000867307	0.0076274
ENSSSCG00000028204	13479.3	16487.1	14912.7	5444.69	991.466	9334.87	344.29	285.51	314.6	126.82	16.73	173.1	314.8	105.55	-1.57651	0.00631497	0.0313239
ENSSSCG00000028277	324.319	253.681	170.461	55.1376	63.3538	129.367	8.28	4.39	3.6	1.28	1.07	2.4	5.42333	1.58333	-1.77621	0.000634306	0.00606711
ENSSSCG00000028278	680.134	2813.23	3003.73	5415.56	11171.6	7125.16	17.37	48.72	63.37	126.15	188.46	132.12	43.1533	148.91	1.7869	4.51849e-05	0.000854531
ENSSSCG00000028336	989.113	2199.27	1983.41	2792.1	4229.08	4139.18	25.26	38.09	41.84	65.04	71.34	76.75	35.0633	71.0433	1.01874	0.00157234	0.0115777
ENSSSCG00000028338	883.052	1418.4	789.485	500.082	517.729	471.993	22.56	24.56	16.66	11.65	8.73	8.75	21.26	9.71	-1.1306	0.00186104	0.0131063
ENSSSCG00000028464	455.663	1496.49	1517.5	1762.58	6623.54	2479.7	11.64	25.91	32.01	41.06	111.74	45.98	23.1867	66.26	1.51484	0.000940222	0.00811382
ENSSSCG00000028479	1342.69	1727.95	1298.95	575.219	677.618	411.358	34.3	29.92	27.4	13.4	11.43	7.63	30.54	10.82	-1.497	2.37062e-05	0.000509953
ENSSSCG00000028488	293.03	88.9483	45.8189	23.5035	58.3968	49.4324	7.48	1.54	0.97	0.55	0.99	0.92	3.33	0.82	-2.02183	0.00349368	0.0206927
ENSSSCG00000028501	350.072	1193.42	774.219	368.936	233.78	446.8	8.94	20.67	16.33	8.59	3.94	8.29	15.3133	6.94	-1.14178	0.0117312	0.0494353
ENSSSCG00000028516	947.489	2733.28	2833.04	3365.49	5140.01	6513.09	24.2	47.33	59.77	78.39	86.71	120.78	43.7667	95.2933	1.12254	0.00262715	0.0168952
ENSSSCG00000028523	423.453	447.219	719.475	1219.07	2028.4	1361.67	10.82	7.74	15.18	28.4	34.22	25.25	11.2467	29.29	1.38091	0.000164643	0.0022034
ENSSSCG00000028531	655.94	1127.64	981.826	1935.81	3433.71	1952.8	16.75	19.53	20.71	45.09	57.93	36.21	18.9967	46.41	1.28869	8.95156e-05	0.00141104
ENSSSCG00000028538	262.995	589.765	720.768	944.039	1711.47	1271.32	6.72	10.21	15.21	21.99	28.87	23.57	10.7133	24.81	1.21151	0.00169523	0.0122435
ENSSSCG00000028552	283.988	350.59	187.807	976.57	1124.63	665.476	7.25	6.07	3.96	22.75	18.97	12.34	5.76	18.02	1.64546	8.4878e-05	0.00135587
ENSSSCG00000028561	162.002	234.621	250.651	875.129	1300.83	984.12	4.14	4.06	5.29	20.38	21.94	18.25	4.49667	20.19	2.16671	1.37884e-08	1.29987e-06
ENSSSCG00000028585	400.1	774.173	873.351	1269.5	2212.03	2025.56	10.22	13.41	18.42	29.57	37.32	37.56	14.0167	34.8167	1.31263	0.000181924	0.00237302
ENSSSCG00000028643	717.118	1169.2	1439.86	2702.79	3847.69	2798.21	18.32	20.25	30.38	62.96	64.91	51.89	22.9833	59.92	1.38245	3.34942e-05	0.000681049
ENSSSCG00000028662	24.4488	100.787	158.781	169.007	408.439	417.414	0.62	1.75	3.35	3.94	6.89	7.74	1.90667	6.19	1.69889	0.00319032	0.0194324
ENSSSCG00000028672	239.313	454.228	186.912	105.022	67.5822	146.322	6.11	7.87	3.94	2.45	1.14	2.71	5.97333	2.1	-1.50815	0.00233961	0.015594
ENSSSCG00000028674	3188.73	4007.46	5859.87	16605.8	45993	27745.3	81.45	69.4	123.62	386.8	775.88	514.49	91.49	559.057	2.61131	4.61311e-11	1.17154e-08
ENSSSCG00000028691	252.714	579.475	349.609	673.267	1344.16	1188.61	6.45	10.03	7.38	15.68	22.68	22.04	7.95333	20.1333	1.33995	0.000398801	0.00440117
ENSSSCG00000028696	319.08	1007.76	1423.19	1925.95	4357.71	2584.03	8.15	17.45	30.02	44.86	73.51	47.92	18.54	55.43	1.58003	0.000304301	0.00355894
ENSSSCG00000028737	797.435	2253.07	1881.62	2675.91	4340.41	4393.42	20.37	39.02	39.7	62.33	73.22	81.47	33.03	72.34	1.13102	0.00101624	0.00855043
ENSSSCG00000028740	56.5878	366.085	215.355	416.468	597.725	953.657	1.45	6.34	4.54	9.7	10.08	17.68	4.11	12.4867	1.60318	0.00242013	0.0159683
ENSSSCG00000028748	136.245	485.628	651.463	963.105	2420.9	1452.16	3.48	8.41	13.74	22.43	40.84	26.93	8.54333	30.0667	1.81529	0.000117011	0.00171473
ENSSSCG00000028759	616.765	1649.95	1477.86	2941.97	4418.05	3048.73	15.75	28.57	31.18	68.53	74.53	56.53	25.1667	66.53	1.40249	5.87009e-05	0.00102884
ENSSSCG00000028804	61.4346	95.2601	80.0522	341.103	756.076	477.838	1.57	1.65	1.69	7.95	12.75	8.86	1.63667	9.85333	2.58985	5.07438e-09	5.95713e-07
ENSSSCG00000028821	195.99	322.742	414.504	624.052	1179.89	937.8	5.01	5.59	8.74	14.54	19.9	17.39	6.44667	17.2767	1.4222	0.00033547	0.00385465
ENSSSCG00000028840	594.242	1151.67	1459.32	1995.47	4138.81	2653.59	15.18	19.94	30.79	46.48	69.82	49.21	21.97	55.17	1.32835	0.000210311	0.0026522
ENSSSCG00000028869	769.651	1766.82	2038.57	3914.86	7871.58	7323.71	19.66	30.6	43.01	91.19	132.79	135.81	31.09	119.93	1.94767	1.05734e-07	6.64283e-06
ENSSSCG00000028886	2102.69	5772.91	6111.66	7587.19	14636.8	12553.6	53.71	99.97	128.93	176.73	246.92	232.79	94.2033	218.813	1.21585	0.00122402	0.00977021
ENSSSCG00000028896	396.57	776.997	201.025	71.4908	27.5465	115.74	10.13	13.46	4.24	1.67	0.46	2.15	9.27667	1.42667	-2.70096	1.15236e-05	0.000294456
ENSSSCG00000028911	143.537	94.7847	108.947	209.271	470.499	321.988	3.67	1.64	2.3	4.87	7.94	5.97	2.53667	6.26	1.30323	0.005373	0.0280813
ENSSSCG00000028943	2789.94	3078.33	3713.25	1505.99	2052.96	1493.94	71.26	53.31	78.34	35.08	34.63	27.7	67.6367	32.47	-1.0587	0.000848702	0.00752225
ENSSSCG00000028964	169.548	599.145	518.187	754.815	1278.92	905.886	4.33	10.38	10.93	17.58	21.57	16.8	8.54667	18.65	1.12574	0.00746066	0.0353409
ENSSSCG00000028978	307.579	692.201	797.746	1420.72	2552.69	1414.63	7.86	11.99	16.83	33.09	43.06	26.23	12.2267	34.1267	1.48087	0.000101288	0.00154083
ENSSSCG00000029030	718.391	1766.63	1753.87	3122.93	5994.14	7046.43	18.35	30.59	37	72.74	101.12	130.67	28.6467	101.51	1.82518	6.23618e-07	2.8426e-05
ENSSSCG00000029035	115.395	347.361	302.365	500.881	756.4	684.268	2.95	6.02	6.38	11.67	12.76	12.69	5.11667	12.3733	1.27396	0.00265737	0.0170105
ENSSSCG00000029039	91.4904	148.585	258.986	369.206	1152.5	837.739	2.34	2.57	5.46	8.6	19.44	15.53	3.45667	14.5233	2.07092	2.00546e-05	0.000442951
ENSSSCG00000029066	5760.52	4749.05	5882.26	2326.01	2917.8	2890.08	147.14	82.24	124.09	54.18	49.22	53.59	117.823	52.33	-1.17092	0.000418847	0.00454396
ENSSSCG00000029073	44.118	55.1478	74.2117	234.335	414.516	375.747	1.13	0.96	1.57	5.46	6.99	6.97	1.22	6.47333	2.40763	1.46865e-07	8.46108e-06
ENSSSCG00000029082	721.744	2201.72	2061.94	3328.94	5618.61	5494.16	18.44	38.13	43.5	77.54	94.78	101.88	33.3567	91.4	1.45422	5.90859e-05	0.00103351
ENSSSCG00000029094	283.255	866.818	741.538	1116.32	1997.99	1520.94	7.23	15.01	15.64	26	33.71	28.2	12.6267	29.3033	1.21459	0.00129179	0.0100847
ENSSSCG00000029097	421.886	1264.2	1316.24	1684.16	3215.9	2569.34	10.78	21.89	27.77	39.23	54.25	47.64	20.1467	47.04	1.22335	0.0011364	0.00926091
ENSSSCG00000029113	300.357	714.744	898.771	1061.72	1657.46	1428.17	7.67	12.38	18.96	24.73	27.96	26.48	13.0033	26.39	1.02111	0.00758064	0.0357082
ENSSSCG00000029163	424.086	704.821	708.928	1903.7	5931.25	3829.71	10.83	12.21	14.96	44.34	100.06	71.02	12.6667	71.8067	2.50308	2.90557e-11	7.8602e-09
ENSSSCG00000029196	82.1013	561.53	662.125	1644.99	3068.82	2909.22	2.1	9.72	13.97	38.32	51.77	53.95	8.59667	48.0133	2.48159	2.64573e-06	8.94661e-05
ENSSSCG00000029198	337.264	921.724	1220.64	1555.63	2873.91	2589.02	8.61	15.96	25.75	36.24	48.48	48.01	16.7733	44.2433	1.39929	0.000465676	0.00487784
ENSSSCG00000029219	688.097	864.91	754.114	316.896	379.035	354.887	17.58	14.98	15.91	7.38	6.39	6.58	16.1567	6.78333	-1.25206	0.000663757	0.00628599
ENSSSCG00000029256	11196.5	17237.2	9965.11	5851.77	6224.62	6052.3	285.99	298.5	210.23	136.31	105.01	112.23	264.907	117.85	-1.16853	0.000421629	0.0045624
ENSSSCG00000029257	50.1597	67.1089	53.4339	139.311	145.838	177.745	1.28	1.16	1.13	3.24	2.46	3.3	1.19	3	1.334	0.00265022	0.0169996
ENSSSCG00000029267	206.045	251.128	605.183	1108.74	1711.09	1661.57	5.26	4.35	12.77	25.83	28.87	30.81	7.46	28.5033	1.93388	9.36909e-06	0.000246329
ENSSSCG00000029281	119.939	225.975	204.297	393.175	1015.5	680.772	3.06	3.91	4.31	9.16	17.13	12.62	3.76	12.97	1.78637	2.57831e-05	0.000542885
ENSSSCG00000029326	663.295	1553.39	2158.34	2672.01	5876.26	3858.39	16.94	26.9	45.53	62.24	99.13	71.55	29.79	77.64	1.38197	0.000354667	0.00403077
ENSSSCG00000029371	201.108	305.211	455.312	594.79	1122.06	717.281	5.14	5.29	9.61	13.85	18.93	13.3	6.68	15.36	1.20126	0.00347411	0.0206247
ENSSSCG00000029413	312.123	881.938	700.473	1319.8	1511.3	1093.78	7.97	15.27	14.78	30.74	25.5	20.28	12.6733	25.5067	1.00908	0.00715546	0.0342546
ENSSSCG00000029414	246.919	287.349	340.301	37.515	151.622	78.0511	6.31	4.98	7.18	0.87	2.56	1.45	6.15667	1.62667	-1.92023	0.000121389	0.00176467
ENSSSCG00000029430	3535.85	2585.57	1854.67	1252.41	1811.83	1184.29	90.31	44.77	39.13	29.17	30.56	21.96	58.07	27.23	-1.0926	0.00355359	0.0209677
ENSSSCG00000029456	460.591	1116.2	1131.31	1641.65	3083.18	1871.12	11.76	19.33	23.87	38.24	52.01	34.7	18.32	41.65	1.1849	0.00101165	0.00853493
ENSSSCG00000029460	355.457	298.408	429.153	157.967	164.038	194.117	9.08	5.17	9.05	3.68	2.77	3.6	7.76667	3.35	-1.21313	0.00541766	0.0282317
ENSSSCG00000029464	625.442	1617.31	1398.95	2492.94	4449.09	3941.12	15.98	28.01	29.51	58.07	75.05	73.08	24.5	68.7333	1.48823	1.45871e-05	0.000351107
ENSSSCG00000029484	277.533	618.016	618.777	942.982	1911.55	1432.15	7.09	10.7	13.05	21.97	32.25	26.56	10.28	26.9267	1.3892	0.000172846	0.00228576
ENSSSCG00000029596	1024.3	1334.52	1286.43	2096.34	6143.53	4329.47	26.16	23.11	27.14	48.83	103.64	80.28	25.47	77.5833	1.60695	3.83759e-06	0.00011903
ENSSSCG00000029633	548.589	1928.94	2120.54	3295.48	6508.91	5689.35	14.01	33.4	44.74	76.76	109.8	105.5	30.7167	97.3533	1.66421	4.00908e-05	0.000779516
ENSSSCG00000029637	178.835	2484.85	2050.79	3905.26	5995.49	5344.13	4.57	43.03	43.26	90.97	101.14	99.1	30.2867	97.07	1.68034	0.00326361	0.0197703
ENSSSCG00000029668	1265.21	1963.21	1968.93	4217.54	7952.87	5543.4	32.32	34	41.54	98.24	134.16	102.79	35.9533	111.73	1.63582	2.9686e-07	1.5587e-05
ENSSSCG00000029696	1.17587	22.7108	30.3511	69.0381	123.753	96.9231	0.03	0.39	0.64	1.61	2.09	1.8	0.353333	1.83333	2.37537	0.000302083	0.003543
ENSSSCG00000029697	535.675	1925.32	1740.04	2537.27	3554.71	2798.21	13.68	33.34	36.71	59.1	59.97	51.89	27.91	56.9867	1.02984	0.00667948	0.0326599
ENSSSCG00000029715	650.682	937.52	1000.84	437.675	477.927	339.11	16.62	16.24	21.11	10.19	8.06	6.29	17.99	8.18	-1.13702	0.00265593	0.01701
ENSSSCG00000029753	1139.29	2296.06	2219.89	4361.02	7696.65	5319.36	29.1	39.76	46.83	101.58	129.84	98.64	38.5633	110.02	1.51246	4.04729e-06	0.000123746
ENSSSCG00000029761	1287.37	1116.11	868.258	264.46	285.998	415.726	32.88	19.33	18.32	6.16	4.82	7.71	23.51	6.23	-1.91597	1.61633e-06	6.09502e-05
ENSSSCG00000029796	2.07911	43.7138	61.5262	185.371	277.511	183.661	0.05	0.76	1.3	4.32	4.68	3.41	0.703333	4.13667	2.55619	0.000282781	0.00334181
ENSSSCG00000029803	863.36	1459.5	1504.95	2106.45	3750.52	2637.21	22.05	25.27	31.75	49.07	63.27	48.9	26.3567	53.7467	1.02801	0.00134986	0.010401
ENSSSCG00000029811	946.552	2376.74	1708.23	2669.27	5540.95	3438.72	24.18	41.16	36.04	62.18	93.47	63.77	33.7933	73.14	1.11392	0.000970608	0.00827844
ENSSSCG00000029815	211.362	349.286	372.155	575.874	1115	853.644	5.4	6.05	7.85	13.41	18.81	15.83	6.43333	16.0167	1.31594	0.000602346	0.00587429
ENSSSCG00000029882	28.2008	106.089	56.0379	151.465	155.723	158.545	0.72	1.84	1.18	3.53	2.63	2.94	1.24667	3.03333	1.28283	0.00853415	0.0389435
ENSSSCG00000029949	392.614	388.046	418.017	217.013	222.344	187.443	10.03	6.72	8.82	5.05	3.75	3.48	8.52333	4.09333	-1.05814	0.0115958	0.0490143
ENSSSCG00000029998	108.317	251.187	257.01	438.643	659.336	591.473	2.77	4.35	5.42	10.22	11.12	10.97	4.18	10.77	1.36544	0.00130001	0.0101235
ENSSSCG00000030018	1.0037	12.9626	5.96757	39.694	81.9372	76.6423	0.03	0.22	0.13	0.92	1.38	1.42	0.126667	1.24	3.29123	1.07297e-07	6.64283e-06
ENSSSCG00000030042	817.892	2363.05	2212.32	4193.22	5281.08	4519.48	20.89	40.92	46.67	97.67	89.09	83.81	36.16	90.19	1.31857	0.000172303	0.002281
ENSSSCG00000030049	3386.62	9253.62	10104.4	12651.9	24696.5	15900.5	86.5	160.25	213.17	294.7	416.62	294.85	153.307	335.39	1.12942	0.00318717	0.0194322
ENSSSCG00000030108	837.163	1798.09	3273.28	2777.81	5416.21	19620.9	21.38	31.14	69.05	64.7	91.37	363.84	40.5233	173.303	2.09647	0.000485914	0.00503892
ENSSSCG00000030118	301.163	634.33	648.168	1218.75	1956.98	1207.72	7.69	10.98	13.67	28.39	33.01	22.4	10.78	27.9333	1.37363	0.000161247	0.00218104
ENSSSCG00000030123	1569.56	3169.17	2405.96	3670.37	7154.85	5581.01	40.09	54.88	50.76	85.49	120.7	103.49	48.5767	103.227	1.08748	0.000607699	0.00591259
ENSSSCG00000030153	445.814	890.975	750.165	1422.43	1699.94	1355.81	11.39	15.43	15.83	33.13	28.68	25.14	14.2167	28.9833	1.02764	0.00231088	0.0154592
ENSSSCG00000030156	672.026	1047.15	983.147	2250.04	5429.84	2738.75	17.17	18.13	20.74	52.41	91.6	50.79	18.68	64.9333	1.79746	2.39836e-07	1.3195e-05
ENSSSCG00000030172	135.01	160.035	163.698	402.947	558.456	397.202	3.45	2.77	3.45	9.39	9.42	7.37	3.22333	8.72667	1.43688	0.000496517	0.00510722
ENSSSCG00000030186	1036.92	2105.4	1841.07	2756.38	4911.33	3410.65	26.49	36.46	38.84	64.21	82.85	63.25	33.93	70.1033	1.04692	0.00101141	0.00853493
ENSSSCG00000030196	671.478	1293.75	1138.8	1959.86	2540.36	2172.79	17.15	22.4	24.02	45.65	42.85	40.29	21.19	42.93	1.0186	0.00137578	0.010523
ENSSSCG00000030229	1444.47	1464.38	1226.11	728.623	738.346	651.694	36.9	25.36	25.87	16.97	12.46	12.08	29.3767	13.8367	-1.08617	0.00173394	0.0124552
ENSSSCG00000030246	393.883	257.409	409.601	1945.36	4768.74	3227.17	10.06	4.46	8.64	45.31	80.45	59.84	7.72	61.8667	3.00249	7.4859e-14	4.65773e-11
ENSSSCG00000030262	1850.25	2533.12	2854.37	3746.03	4975.52	8299.47	47.26	43.87	60.22	87.26	83.93	153.9	50.45	108.363	1.10295	0.00149539	0.0111229
ENSSSCG00000030289	1094.15	3580.99	3686.78	4879.66	8734.49	8352.29	27.95	62.01	77.78	113.66	147.35	154.88	55.9133	138.63	1.30998	0.000805801	0.00722955
ENSSSCG00000030291	529.401	1267.9	1388.76	1831.91	2590.9	2390.79	13.52	21.96	29.3	42.67	43.71	44.33	21.5933	43.57	1.01275	0.00381754	0.0220418
ENSSSCG00000030305	181.548	287.8	323.634	1156.96	1435.77	1332.5	4.64	4.98	6.83	26.95	24.22	24.71	5.48333	25.2933	2.20563	2.2492e-09	3.10989e-07
ENSSSCG00000030351	417.814	454.087	531.453	1275.66	4193.74	2300.62	10.67	7.86	11.21	29.71	70.75	42.66	9.91333	47.7067	2.26675	5.97161e-09	6.8175e-07
ENSSSCG00000030354	54.9796	135.963	157.761	375.563	665.236	1044.02	1.4	2.35	3.33	8.75	11.22	19.36	2.36	13.11	2.47381	5.76143e-07	2.67519e-05
ENSSSCG00000030359	455.063	599.341	719.739	1342.11	2233.77	1530.36	11.62	10.38	15.18	31.26	37.68	28.38	12.3933	32.44	1.38821	4.62202e-05	0.000867882
ENSSSCG00000030386	692.379	1531.33	1840.69	2046.3	4216.86	2927.37	17.68	26.52	38.83	47.66	71.14	54.28	27.6767	57.6933	1.05973	0.00336771	0.0202054
ENSSSCG00000030408	696.806	1019.68	1930.91	1028.2	1925.19	12132.1	17.8	17.66	40.74	23.95	32.48	224.97	25.4	93.8	1.88476	0.00533853	0.0279599
ENSSSCG00000030413	446.253	1063.72	1122.34	1760.1	3369.94	3498.97	11.4	18.42	23.68	41	56.85	64.88	17.8333	54.2433	1.60487	9.60645e-06	0.000251669
ENSSSCG00000030423	952.68	2384.72	2257.87	3014.06	4621.28	5570.36	24.33	41.3	47.63	70.21	77.96	103.29	37.7533	83.82	1.15069	0.000865294	0.00761508
ENSSSCG00000030435	473.628	1774.18	1909.5	2307.05	4515.63	2742.14	12.1	30.72	40.28	53.74	76.18	50.85	27.7	60.2567	1.12123	0.00662717	0.0324679
ENSSSCG00000030443	449.746	1049.92	1028.13	1289.47	2325.34	2003.84	11.49	18.18	21.69	30.04	39.23	37.16	17.12	35.4767	1.05119	0.00273909	0.0174349
ENSSSCG00000030460	933.996	1655.36	1310.22	3251.82	6903.15	4816.02	23.86	28.67	27.64	75.75	116.45	89.31	26.7233	93.8367	1.81205	1.64481e-08	1.47252e-06
ENSSSCG00000030467	164.186	258.159	323.456	855.889	1384.38	1882.57	4.19	4.47	6.82	19.94	23.35	34.91	5.16	26.0667	2.33676	6.36855e-09	7.13966e-07
ENSSSCG00000030469	280.943	726.496	1043.81	1519.04	3346.26	2366.9	7.18	12.58	22.02	35.38	56.45	43.89	13.9267	45.24	1.69975	4.33333e-05	0.000828081
ENSSSCG00000030484	370.984	1079.59	1082.4	1740.91	2536.39	2371.36	9.48	18.7	22.83	40.55	42.79	43.97	17.0033	42.4367	1.31949	0.000338978	0.0038842
ENSSSCG00000030502	319.823	505.556	572.708	1028.31	1689.27	1397.38	8.17	8.75	12.08	23.95	28.5	25.91	9.66667	26.12	1.43406	4.39407e-05	0.000836083
ENSSSCG00000030560	180.454	577.467	555.503	637.422	1375.34	1338.25	4.61	10	11.72	14.85	23.2	24.82	8.77667	20.9567	1.25566	0.00313254	0.0191554
ENSSSCG00000030616	643.055	893.071	1035.27	2264.41	3373.32	3622.62	16.43	15.47	21.84	52.75	56.91	67.18	17.9133	58.9467	1.71838	1.19038e-07	7.15605e-06
ENSSSCG00000030642	4364.85	6355.15	8764.27	10347	19589.9	13034.3	111.49	110.05	184.89	241.02	330.47	241.7	135.477	271.063	1.00059	0.00432281	0.024047
ENSSSCG00000030680	1642.23	2031.27	1250.78	5843.66	8465.3	4115.55	41.95	35.18	26.39	136.12	142.81	76.32	34.5067	118.417	1.77893	5.82243e-07	2.69347e-05
ENSSSCG00000030681	307.927	194.074	179.939	934.154	919.548	558.074	7.87	3.36	3.8	21.76	15.51	10.35	5.01	15.8733	1.66372	0.000334767	0.00385013
ENSSSCG00000030685	14.8645	428.34	524.941	1025.84	2487.12	2248.48	0.38	7.42	11.07	23.9	41.96	41.69	6.29	35.85	2.51084	0.00069827	0.006553
ENSSSCG00000030706	29.1646	45.9167	37.804	79.316	256.36	163.224	0.74	0.8	0.8	1.85	4.32	3.03	0.78	3.06667	1.97513	6.30161e-05	0.00108013
ENSSSCG00000030820	1248.4	2932.28	2800.24	6252.78	13513.9	10076.8	31.89	50.78	59.07	145.65	227.97	186.86	47.2467	186.827	1.98342	5.81895e-08	4.23456e-06
ENSSSCG00000030821	436.824	322.317	558.065	2012.74	5513.23	3462.77	11.16	5.58	11.77	46.88	93.01	64.21	9.50333	68.0333	2.83974	2.09289e-12	8.40127e-10
ENSSSCG00000030921	2.17703e+06	1.5823e+06	623073	605324	216378	847615	55606.3	27400.9	13144.6	14100	3650.2	15717.7	32050.6	11156	-1.52254	0.00642784	0.0317665
ENSSSCG00000030957	1085.63	2689.48	2645.91	4013.96	7215.01	5135.66	27.73	46.57	55.82	93.5	121.71	95.23	43.3733	103.48	1.25447	0.000281373	0.0033315
ENSSSCG00000031003	45.3984	71.2566	34.0801	14.6523	11.1103	21.9087	1.16	1.23	0.72	0.34	0.19	0.41	1.03667	0.313333	-1.72618	0.00113578	0.00926091
ENSSSCG00000031080	235.585	609.66	457.934	110.957	209.33	210.801	6.02	10.56	9.66	2.58	3.53	3.91	8.74667	3.34	-1.38889	0.00147883	0.0110592
ENSSSCG00000031106	1378.04	700.148	1078.05	2246.05	3349.2	2650.79	35.2	12.12	22.74	52.32	56.5	49.15	23.3533	52.6567	1.17299	0.00222473	0.0150133
ENSSSCG00000031112	37776.5	33032.3	18176.6	14082.2	6674.56	19762.4	964.9	572.02	383.46	328.02	112.6	366.46	640.127	269.027	-1.25061	0.00745404	0.0353229
ENSSSCG00000031117	807.847	1092.15	1371.37	2283.98	4331.62	2817.24	20.63	18.91	28.93	53.2	73.07	52.24	22.8233	59.5033	1.38246	3.33579e-05	0.000679387
ENSSSCG00000031118	686.858	1697.44	1828.32	4363.33	7152.52	4235.26	17.54	29.39	38.57	101.64	120.66	78.54	28.5	100.28	1.815	5.73508e-07	2.67294e-05
ENSSSCG00000031121	133.021	573.301	652.543	927.455	1679.26	1005.94	3.4	9.93	13.77	21.6	28.33	18.65	9.03333	22.86	1.3395	0.00422536	0.0236742
ENSSSCG00000031123	397.794	1425.17	1802.79	2618.97	3867.04	3313.43	10.16	24.68	38.03	61	65.24	61.44	24.29	62.56	1.36488	0.00109247	0.00902103
ENSSSCG00000031147	994.655	2977.33	2005.54	3145.52	5073.73	5159.23	25.41	51.56	42.31	73.27	85.59	95.67	39.76	84.8433	1.09348	0.0012859	0.0100513
ENSSSCG00000031155	202.576	440.14	503.974	167.449	191.097	159.791	5.17	7.62	10.63	3.9	3.22	2.96	7.80667	3.36	-1.21625	0.00594136	0.0301328
ENSSSCG00000031169	1470.57	2808.96	3327.98	4431.52	8051.23	5541.98	37.56	48.64	70.21	103.22	135.82	102.77	52.1367	113.937	1.12786	0.000918965	0.00799134
ENSSSCG00000031170	1806.65	1851.54	2399.25	6034.22	14162.2	11815.5	46.15	32.06	50.62	140.56	238.91	219.1	42.9433	199.523	2.21605	1.23281e-09	1.87086e-07
ENSSSCG00000031175	303.526	640.385	482.765	1025.46	1363.22	1122.61	7.75	11.09	10.18	23.89	23	20.82	9.67333	22.57	1.22232	0.000507156	0.00516876
ENSSSCG00000031201	1300.54	3170.83	2839.2	884.867	1044.54	796.741	33.22	54.91	59.9	20.61	17.62	14.77	49.3433	17.6667	-1.48183	1.76375e-05	0.000405694
ENSSSCG00000031212	110.91	296.052	249.768	540.839	529.044	753.938	2.83	5.13	5.27	12.6	8.92	13.98	4.41	11.8333	1.42401	0.000946811	0.00813351
ENSSSCG00000031244	228.781	269.673	250.973	91.6081	96.4245	111.084	5.84	4.67	5.29	2.13	1.63	2.06	5.26667	1.94	-1.44083	0.00086289	0.00759929
ENSSSCG00000031261	15.554	91.1235	161.546	264.185	560.47	416.049	0.4	1.58	3.41	6.15	9.45	7.71	1.79667	7.77	2.11259	0.000676593	0.00637842
ENSSSCG00000031262	2055.29	9683.56	8369.08	10296.3	23597.6	15762.3	52.5	167.69	176.56	239.84	398.08	292.29	132.25	310.07	1.22933	0.00510866	0.0272025
ENSSSCG00000031274	237.922	456.317	316.54	97.4801	77.5958	73.075	6.08	7.9	6.68	2.27	1.31	1.36	6.88667	1.64667	-2.06426	6.06537e-06	0.00017154
ENSSSCG00000031288	159.678	725.978	773.543	1446.37	3148.59	2290.3	4.08	12.57	16.32	33.69	53.12	42.47	10.99	43.0933	1.97127	1.65436e-05	0.000389166
ENSSSCG00000031329	147.005	193.407	232.05	425.521	689.467	497.464	3.75	3.35	4.9	9.91	11.63	9.22	4	10.2533	1.35802	0.000912656	0.00795265
ENSSSCG00000031346	253.704	514.413	567.657	848.187	1473.23	1351.94	6.48	8.91	11.98	19.76	24.85	25.07	9.12333	23.2267	1.34815	0.000293047	0.00345002
ENSSSCG00000031380	624.245	1136.03	1132.05	1858.88	3827.68	3522.35	15.94	19.67	23.88	43.3	64.57	65.32	19.83	57.73	1.54164	4.38109e-06	0.000132326
ENSSSCG00000031456	807.434	1771.76	1681.12	1932.28	3572.71	4184.88	20.62	30.68	35.47	45.01	60.27	77.6	28.9233	60.96	1.07563	0.00187794	0.0131948
ENSSSCG00000031461	510.08	2039.67	1722.67	2572.63	3758.56	3130.54	13.03	35.32	36.34	59.93	63.41	58.05	28.23	60.4633	1.09883	0.00443807	0.0245237
ENSSSCG00000031462	1092.63	871.608	902.111	2046.97	3252.24	1900.23	27.91	15.09	19.03	47.68	54.86	35.24	20.6767	45.9267	1.15133	0.00100135	0.0084941
ENSSSCG00000031465	336.528	1057.48	650.223	1191.12	2672.62	2060.86	8.6	18.31	13.72	27.75	45.09	38.22	13.5433	37.02	1.45072	0.000120533	0.00175839
ENSSSCG00000031476	636.758	829.132	829.508	4786.75	9707.95	7185.25	16.26	14.36	17.5	111.5	163.77	133.24	16.04	136.17	3.08566	5.24155e-20	2.17419e-16
ENSSSCG00000031485	267.146	145.91	213.17	40.2274	70.1038	128.799	6.82	2.53	4.5	0.94	1.18	2.39	4.61667	1.50333	-1.61869	0.0026207	0.0168624
ENSSSCG00000031495	11.937	31.3154	42.3287	62.2805	222.808	134.78	0.3	0.54	0.89	1.45	3.76	2.5	0.576667	2.57	2.15596	0.000113182	0.00167871
ENSSSCG00000031509	214.728	662.087	702.599	1240.4	3548.66	2113.71	5.48	11.47	14.82	28.89	59.86	39.2	10.59	42.65	2.00984	2.66736e-06	8.97099e-05
ENSSSCG00000031531	152.3	280.659	192.989	483.5	1150.3	466.114	3.89	4.86	4.07	11.26	19.4	8.64	4.27333	13.1	1.61613	0.000205986	0.00261293
ENSSSCG00000031537	243.138	467.725	414.944	106.355	136.557	139.96	6.21	8.1	8.75	2.48	2.3	2.6	7.68667	2.46	-1.6437	0.000104486	0.00157516
ENSSSCG00000031541	1960.65	4224.7	3795.07	5563.08	9099.29	8070.02	50.08	73.16	80.06	129.58	153.5	149.65	67.7667	144.243	1.08986	0.00112716	0.00922184
ENSSSCG00000031547	360.369	1208.77	1202.66	1785.97	2385.41	2086.67	9.2	20.93	25.37	41.6	40.24	38.69	18.5	40.1767	1.11883	0.00355345	0.0209677
ENSSSCG00000031553	321.653	664.057	139.201	169.976	98.0749	137.61	8.22	11.5	2.94	3.96	1.65	2.55	7.55333	2.72	-1.47351	0.00753746	0.0356233
ENSSSCG00000031612	172.888	401.541	393.032	663.026	932.587	977.431	4.42	6.95	8.29	15.44	15.73	18.12	6.55333	16.43	1.32603	0.000757022	0.00690138
ENSSSCG00000031615	2178.84	2579.36	2748.09	4266.28	7997.4	5001.68	55.65	44.67	57.97	99.38	134.91	92.75	52.7633	109.013	1.0469	0.00112258	0.0091904
ENSSSCG00000031630	1775.62	1094.28	900.974	617.079	750.617	504.554	45.35	18.95	19.01	14.37	12.66	9.36	27.77	12.13	-1.19495	0.0039352	0.0225459
ENSSSCG00000031640	6907.87	11428.4	9936.62	15757.2	24230.7	22512.1	176.44	197.91	209.63	367.04	408.76	417.45	194.66	397.75	1.03091	0.00131374	0.0102048
ENSSSCG00000031666	9.06004	102.675	98.3645	241.19	321.857	193.446	0.23	1.78	2.08	5.62	5.43	3.59	1.36333	4.88	1.83974	0.00347723	0.0206247
ENSSSCG00000031712	808.798	994.346	1123.47	301.797	315.605	423.759	20.66	17.22	23.7	7.03	5.32	7.86	20.5267	6.73667	-1.60739	1.85814e-05	0.000418889
ENSSSCG00000031736	6082.81	9278.22	5457.62	3677.57	2326.06	3371.82	155.37	160.67	115.14	85.66	39.24	62.53	143.727	62.4767	-1.20194	0.00103895	0.00868864
ENSSSCG00000031741	713.765	1915.94	3170.26	4713.78	13182.3	8199.38	18.23	33.18	66.88	109.8	222.38	152.04	39.43	161.407	2.03333	1.21728e-05	0.000307884
ENSSSCG00000031776	18.1766	108.043	106.502	285.367	605.845	482.708	0.46	1.87	2.25	6.65	10.22	8.95	1.52667	8.60667	2.49507	8.62107e-06	0.000228743
ENSSSCG00000031793	45.4592	172.105	128.405	245.655	288.053	295.252	1.16	2.98	2.71	5.72	4.86	5.47	2.28333	5.35	1.2284	0.00985195	0.0434857
ENSSSCG00000031799	3594.08	3843.84	3232.37	1245.91	1367.86	1844.68	91.8	66.56	68.19	29.02	23.08	34.21	75.5167	28.77	-1.39223	1.60748e-05	0.000381018
ENSSSCG00000031855	0	39.6571	43.0914	122.303	220.491	181.202	0	0.69	0.91	2.85	3.72	3.36	0.533333	3.31	2.63372	0.000659302	0.00626186
ENSSSCG00000031876	89.6642	280.957	266.669	403.074	644.087	489.596	2.29	4.87	5.63	9.39	10.87	9.08	4.26333	9.78	1.19785	0.0077431	0.0362237
ENSSSCG00000031897	820.983	750.24	764.636	1379.03	2307.94	1887.55	20.97	12.99	16.13	32.12	38.93	35	16.6967	35.35	1.08215	0.00127543	0.0100135
ENSSSCG00000031902	52.6083	108.188	110.266	243.612	393.732	286.087	1.34	1.87	2.33	5.67	6.64	5.31	1.84667	5.87333	1.66926	0.00018302	0.00238232
ENSSSCG00000031905	101.66	384.863	189.292	481.249	895.431	549.012	2.6	6.66	3.99	11.21	15.11	10.18	4.41667	12.1667	1.4619	0.00127658	0.0100163
ENSSSCG00000031919	7665.84	12346.4	10321.7	2760.12	2330.17	3492.27	195.8	213.81	217.75	64.29	39.31	64.76	209.12	56.12	-1.89774	3.86931e-08	2.99066e-06
ENSSSCG00000031949	431.599	952.903	878.764	1355.39	2340.75	1903.24	11.02	16.5	18.54	31.57	39.49	35.29	15.3533	35.45	1.20723	0.000422525	0.00456812
ENSSSCG00000031954	407.138	718.311	787.52	1093.44	1876.13	1697.39	10.4	12.44	16.61	25.47	31.65	31.48	13.15	29.5333	1.16728	0.000695056	0.00652775
ENSSSCG00000031970	1228.01	1488.44	1349.84	3111.52	6231.78	3588.54	31.37	25.78	28.48	72.48	105.13	66.54	28.5433	81.3833	1.51158	2.94723e-06	9.65142e-05
ENSSSCG00000031999	437.453	329.377	242.433	629.761	1307.25	914.469	11.17	5.7	5.11	14.67	22.05	16.96	7.32667	17.8933	1.28819	0.00231878	0.0154794
[truncated: 493 more rows]

## Sheet: IPP（SPF vs. GF）
id	GF1_IPP	GF2_IPP	GF3_IPP	SPF1_IPP	SPF2_IPP	SPF3_IPP	GF1_IPP_CPM	GF2_IPP_CPM	GF3_IPP_CPM	SPF1_IPP_CPM	SPF2_IPP_CPM	SPF3_IPP_CPM	GF_IPP_mean	SPF_IPP_mean	log2(fc)	PValue	FDR
ENSSSCG00000000006	331.515	639.42	490.422	2063.99	1211.46	1648.13	7.12	11.19	8.55	41.07	22.98	30.2	8.95333	31.4167	1.81103	2.8e-11	1.52e-08
ENSSSCG00000000625	265.417	947.259	832.486	1674.72	2038.3	2024.48	5.7	16.58	14.51	33.32	38.67	37.1	12.2633	36.3633	1.56813	8.25e-07	6.08e-05
ENSSSCG00000000638	413.607	543.401	219.414	639.113	952.48	770.176	8.88	9.51	3.82	12.72	18.07	14.11	7.40333	14.9667	1.01551	0.00220288	0.0264856
ENSSSCG00000000642	1.66917	6.76457	7.86167	16.6538	48.9048	29.9925	0.04	0.12	0.14	0.33	0.93	0.55	0.1	0.603333	2.59296	6.93e-07	5.39e-05
ENSSSCG00000000709	2225.36	2799.62	1537.19	5938.69	3134.46	4516.64	47.79	49.01	26.8	118.17	59.46	82.77	41.2	86.8	1.07505	0.000135406	0.00330391
ENSSSCG00000000774	2047.5	1729.32	1721.43	2176.18	3783.89	5821.62	43.97	30.27	30.01	43.3	71.78	106.69	34.75	73.9233	1.08902	0.000169738	0.0039507
ENSSSCG00000000783	41.2189	156.139	182.496	279.685	381.292	371.212	0.89	2.73	3.18	5.57	7.23	6.8	2.26667	6.53333	1.52725	0.000180749	0.00415756
ENSSSCG00000000801	425.192	723.198	390.037	1824.95	1250.23	606.742	9.13	12.66	6.8	36.31	23.72	11.12	9.53	23.7167	1.31535	0.000355248	0.00681157
ENSSSCG00000000857	192.457	234.843	232.145	392.873	439.811	550.657	4.13	4.11	4.05	7.82	8.34	10.09	4.09667	8.75	1.09483	8.39e-05	0.00228439
ENSSSCG00000000875	9992.48	12361.4	4933.67	24166	21175	16670.8	214.59	216.38	86	480.85	401.7	305.52	172.323	396.023	1.20047	0.000203882	0.00446674
ENSSSCG00000000927	184.85	350.696	360.096	487.746	643.233	713.363	3.97	6.14	6.28	9.7	12.2	13.07	5.46333	11.6567	1.0933	0.000184841	0.00422065
ENSSSCG00000001025	9121.6	9671.51	8243.77	21775.3	17736.1	16958	195.89	169.3	143.71	433.28	336.47	310.78	169.633	360.177	1.08629	3.31e-06	0.000196841
ENSSSCG00000001065	303.006	714.811	581.376	1259.14	1249.14	1349.92	6.51	12.51	10.13	25.05	23.7	24.74	9.71667	24.4967	1.33405	4.25e-07	3.75e-05
ENSSSCG00000001229	27054.1	51663.3	27656.6	49739.6	151166	67593.6	580.99	904.34	482.11	989.7	2867.71	1238.76	655.813	1698.72	1.37309	0.000194566	0.00434682
ENSSSCG00000001252	2130.57	9041.1	3850.65	6395.92	19807.7	37800.5	45.75	158.26	67.13	127.26	375.77	692.75	90.38	398.593	2.14084	3.68e-05	0.00126182
ENSSSCG00000001447	2687.56	2359.52	1530.67	3912.81	4294.11	5522.21	57.72	41.3	26.68	77.86	81.46	101.2	41.9	86.84	1.05141	4.67e-05	0.00148488
ENSSSCG00000001499	3136.56	4296.68	3157.6	10607.3	8182.7	11178.1	67.36	75.21	55.04	211.06	155.23	204.86	65.87	190.383	1.53121	3.17e-11	1.58e-08
ENSSSCG00000001552	91.1589	59.2568	14.7147	7.82233	9.12601	19.7922	1.96	1.04	0.26	0.16	0.17	0.36	1.08667	0.23	-2.2402	0.00023805	0.00502274
ENSSSCG00000001561	223.416	275.602	224.822	290.727	893.116	1633.18	4.8	4.82	3.92	5.78	16.94	29.93	4.51333	17.55	1.95921	9.37e-06	0.00043015
ENSSSCG00000001720	1058.71	1062.08	927.09	1939.43	2742.2	2809.02	22.74	18.59	16.16	38.59	52.02	51.48	19.1633	47.3633	1.30542	2.2e-09	5.96e-07
ENSSSCG00000001724	23751.4	20698.3	7880.57	57557.6	48168.6	43971.2	510.06	362.31	137.38	1145.26	913.79	805.84	336.583	954.963	1.50448	4.57e-05	0.00146323
ENSSSCG00000001807	405.374	417.876	580.948	287.552	232.574	141.842	8.71	7.31	10.13	5.72	4.41	2.6	8.71667	4.24333	-1.03858	0.0017813	0.0227348
ENSSSCG00000001835	1163.41	1417.46	1653.1	3545.53	2106.76	3437.76	24.98	24.81	28.82	70.55	39.97	63	26.2033	57.84	1.14232	7.35e-07	5.58e-05
ENSSSCG00000001849	131854	89920.6	59449.8	283690	201630	220315	2831.58	1574.02	1036.34	5644.75	3825.06	4037.61	1813.98	4502.47	1.31156	7.15e-05	0.00203495
ENSSSCG00000001869	176.759	554.216	679.412	837.783	1081.07	1204.55	3.8	9.7	11.84	16.67	20.51	22.08	8.44667	19.7533	1.22564	0.000387512	0.0072843
ENSSSCG00000001977	1427.55	2104.56	1207.79	2564.36	3498.49	3513.86	30.66	36.84	21.05	51.02	66.37	64.4	29.5167	60.5967	1.03771	6.55e-06	0.000328561
ENSSSCG00000001978	1187.4	1399.47	774.171	2242.01	5285.4	4354.53	25.5	24.5	13.5	44.61	100.27	79.8	21.1667	74.8933	1.82304	3.07e-09	7.8e-07
ENSSSCG00000002041	7927.89	7687.77	5435.58	17405.6	13752.9	20403.4	170.25	134.57	94.75	346.33	260.9	373.92	133.19	327.05	1.29603	7.03e-07	5.4e-05
ENSSSCG00000002279	2700.51	8351.04	10391	1625.87	1496.48	1941.72	57.99	146.18	181.14	32.35	28.39	35.59	128.437	32.11	-1.99996	1.04e-09	3.01e-07
ENSSSCG00000002287	992.571	1956.37	1450.18	3421.48	2926.19	2916.39	21.32	34.25	25.28	68.08	55.51	53.45	26.95	59.0133	1.13076	3.24e-07	2.99e-05
ENSSSCG00000002355	3850.96	4153.64	2454.71	11328.5	8919.15	7980.77	82.7	72.71	42.79	225.41	169.2	146.26	66.0667	180.29	1.44832	1.42e-07	1.62e-05
ENSSSCG00000002387	401.322	722.236	1293.6	1365.36	1658.79	1630.11	8.62	12.64	22.55	27.17	31.47	29.87	14.6033	29.5033	1.01458	0.00070468	0.0112995
ENSSSCG00000002414	2864.61	4779.96	3742.87	7108.44	7569.26	8179.33	61.52	83.67	65.25	141.44	143.59	149.9	70.1467	144.977	1.04737	1.24e-06	8.5e-05
ENSSSCG00000002507	62.2847	217.994	87.8052	180.222	327.546	324.774	1.34	3.82	1.53	3.59	6.21	5.95	2.23	5.25	1.23527	0.00304197	0.0326685
ENSSSCG00000002656	791.845	1718.42	1244.06	3101.96	2187.25	2971.12	17	30.08	21.69	61.72	41.49	54.45	22.9233	52.5533	1.19697	7.86e-07	5.82e-05
ENSSSCG00000002690	138.792	194.706	183.481	443.196	323.117	421.217	2.98	3.41	3.2	8.82	6.13	7.72	3.19667	7.55667	1.24118	2.26e-05	0.000839384
ENSSSCG00000002716	321.214	236.405	287.497	472.592	566.675	692.908	6.9	4.14	5.01	9.4	10.75	12.7	5.35	10.95	1.03332	0.000482095	0.00866935
ENSSSCG00000002737	1450.8	2731.04	1622.17	5057.7	4292.88	4978.64	31.16	47.81	28.28	100.64	81.44	91.24	35.75	91.1067	1.34961	4.05e-09	9.33e-07
ENSSSCG00000002739	653.981	576.38	425.345	1727.19	2289.36	1768.71	14.04	10.09	7.41	34.37	43.43	32.41	10.5133	36.7367	1.805	3.94e-12	3.07e-09
ENSSSCG00000002755	244.494	763.939	769.081	1280.4	1959.65	2283.28	5.25	13.37	13.41	25.48	37.18	41.84	10.6767	34.8333	1.70601	1.99e-07	2.08e-05
ENSSSCG00000002792	238.401	236.576	336.394	160.664	120.355	82.765	5.12	4.14	5.86	3.2	2.28	1.52	5.04	2.33333	-1.11103	0.00123264	0.0173715
ENSSSCG00000002815	1725.26	1457.54	971.023	3847.82	3698.95	3238.9	37.05	25.51	16.93	76.56	70.17	59.36	26.4967	68.6967	1.37443	1.65e-07	1.82e-05
ENSSSCG00000002821	383.882	548.619	607.449	101.127	108.706	282.965	8.24	9.6	10.59	2.01	2.06	5.19	9.47667	3.08667	-1.61833	2.14e-05	0.000809086
ENSSSCG00000002847	3126.09	3922.42	971.453	12430.8	6209.35	8221.01	67.13	68.66	16.93	247.34	117.8	150.66	50.9067	171.933	1.75592	3.75e-05	0.00127186
ENSSSCG00000002857	63.7399	170.162	228.059	398.575	506.442	346.12	1.37	2.98	3.98	7.93	9.61	6.34	2.77667	7.96	1.51941	5.84e-05	0.001744
ENSSSCG00000003282	223.271	222	298.272	33.0869	153.921	128.646	4.79	3.89	5.2	0.66	2.92	2.36	4.62667	1.98	-1.22447	0.00512373	0.0460359
ENSSSCG00000003407	615.346	919.622	581.495	1781.44	1232.84	1330.89	13.21	16.1	10.14	35.45	23.39	24.39	13.15	27.7433	1.07708	2.26e-05	0.000839384
ENSSSCG00000003438	1712.35	2795.28	2692.63	4401.89	4271.47	5671.73	36.77	48.93	46.94	87.59	81.03	103.94	44.2133	90.8533	1.03906	3.56e-07	3.23e-05
ENSSSCG00000003547	101.695	145.792	150.715	232.041	287.271	303.866	2.18	2.55	2.63	4.62	5.45	5.57	2.45333	5.21333	1.08746	0.000238607	0.00502407
ENSSSCG00000003621	127.376	320.401	304.445	501.065	508.257	533.115	2.74	5.61	5.31	9.97	9.64	9.77	4.55333	9.79333	1.10488	0.00050484	0.00892771
ENSSSCG00000003709	884.507	1227.63	1132.85	2328.71	2661.65	2843.13	18.99	21.49	19.75	46.34	50.49	52.1	20.0767	49.6433	1.30608	1.45e-11	8.34e-09
ENSSSCG00000003763	960.492	862.649	921.892	1305.57	4814.01	7888.08	20.63	15.1	16.07	25.98	91.32	144.56	17.2667	87.2867	2.33777	6.08e-08	8.14e-06
ENSSSCG00000003833	611.092	904.283	450.216	1378.25	1101.41	1534.61	13.12	15.83	7.85	27.42	20.89	28.12	12.2667	25.4767	1.05443	0.000125522	0.00312728
ENSSSCG00000003908	10934	25046.5	25037.8	10619.8	6041.3	5835.24	234.81	438.43	436.46	211.31	114.61	106.94	369.9	144.287	-1.3582	1.52e-05	0.000612554
ENSSSCG00000004017	2079.52	1456.91	408.131	5556.43	1907.51	2936.76	44.66	25.5	7.11	110.56	36.19	53.82	25.7567	66.8567	1.37613	0.00576217	0.0496617
ENSSSCG00000004139	4760.04	5983.42	3043.15	12741.2	7749.1	10039.7	102.22	104.74	53.05	253.52	147.01	183.99	86.67	194.84	1.16869	6.52e-05	0.00189243
ENSSSCG00000004149	1276.93	1442.87	938.318	3441.79	1607.25	2222.1	27.42	25.26	16.36	68.48	30.49	40.72	23.0133	46.5633	1.01672	0.000479708	0.00863891
ENSSSCG00000004181	482.457	309.283	246.331	1726.74	2595.2	1947.24	10.36	5.41	4.29	34.36	49.23	35.69	6.68667	39.76	2.57196	4.03e-16	7.16e-13
ENSSSCG00000004347	1693.27	1192.35	1111.04	3599.89	3262.31	3459.86	36.36	20.87	19.37	71.63	61.89	63.41	25.5333	65.6433	1.36227	2.72e-08	4.33e-06
ENSSSCG00000004419	972.27	1214.38	1035.56	2633.11	1992.28	2504.04	20.88	21.26	18.05	52.39	37.79	45.89	20.0633	45.3567	1.17675	1.65e-08	2.93e-06
ENSSSCG00000004473	463.502	1715.82	1857.01	2501.67	3344	3439.04	9.95	30.03	32.37	49.78	63.44	63.03	24.1167	58.75	1.28456	0.000127452	0.00315939
ENSSSCG00000004511	3431.72	4116.77	3173.75	7534.65	7090.31	6671.03	73.7	72.06	55.33	149.92	134.51	122.26	67.03	135.563	1.01609	1.6e-06	0.0001041
ENSSSCG00000004534	705.09	574.016	501.003	1236.87	1192.01	1212.78	15.14	10.05	8.73	24.61	22.61	22.23	11.3067	23.15	1.03384	4.8e-05	0.00151725
ENSSSCG00000004572	107.782	346.97	193.605	89.6999	76.207	113.468	2.31	6.07	3.37	1.78	1.45	2.08	3.91667	1.77	-1.14588	0.00264813	0.0300395
ENSSSCG00000004653	2603	3747.88	3619.46	8951.21	7207.47	6184.69	55.9	65.61	63.09	178.11	136.73	113.34	61.5333	142.727	1.21381	5.78e-08	7.82e-06
ENSSSCG00000004663	1373.06	1981.13	1440.04	3239.82	4229.5	4223.08	29.49	34.68	25.1	64.46	80.24	77.39	29.7567	74.03	1.3149	2.14e-10	8.32e-08
ENSSSCG00000004676	412.692	2008.42	2984.38	350.204	405.135	463.432	8.86	35.16	52.02	6.97	7.69	8.49	32.0133	7.71667	-2.05262	4.04e-06	0.00022768
ENSSSCG00000004678	317.9	3502.19	3809.34	305.808	315.39	383.586	6.83	61.3	66.41	6.08	5.98	7.03	44.8467	6.36333	-2.81715	3.24e-07	2.99e-05
ENSSSCG00000004718	77.2334	267.782	259.533	473.043	477.92	609.146	1.66	4.69	4.52	9.41	9.07	11.16	3.62333	9.88	1.44719	9.52e-05	0.00253019
ENSSSCG00000004902	105.396	199.763	64.0536	480.682	405.936	488.72	2.26	3.5	1.12	9.56	7.7	8.96	2.29333	8.74	1.93019	4.48e-07	3.9e-05
ENSSSCG00000004973	1488.63	1598.91	972.405	2740.83	2819.1	2648.74	31.97	27.99	16.95	54.54	53.48	48.54	25.6367	52.1867	1.02547	1.29e-05	0.000541064
ENSSSCG00000004980	89.668	224.077	163.975	428.253	490.715	392.809	1.93	3.92	2.86	8.52	9.31	7.2	2.90333	8.34333	1.52291	3.11e-06	0.000186799
ENSSSCG00000005125	857.294	2185.53	1223.89	3407.79	3479.27	4089.88	18.41	38.26	21.33	67.81	66	74.95	26	69.5867	1.4203	4.9e-08	6.77e-06
ENSSSCG00000005170	662.516	1463.2	1301.81	2006.68	2513.72	2635.99	14.23	25.61	22.69	39.93	47.69	48.31	20.8433	45.31	1.12024	2.11e-06	0.000132093
ENSSSCG00000005180	46.6923	97.8818	93.1421	140.394	207.426	238.273	1	1.71	1.62	2.79	3.94	4.37	1.44333	3.7	1.35812	7.74e-05	0.00214865
ENSSSCG00000005194	255.793	494.831	349.538	845.315	819.188	634.949	5.49	8.66	6.09	16.82	15.54	11.64	6.74667	14.6667	1.12029	7.05e-05	0.00201148
ENSSSCG00000005222	14125	21698.8	10198.4	42088.5	32339.2	36871.7	303.33	379.83	177.78	837.46	613.5	675.73	286.98	708.897	1.30463	4.78e-06	0.000257371
ENSSSCG00000005252	107.614	408.537	493.606	724.622	761.775	1051.35	2.31	7.15	8.6	14.42	14.45	19.27	6.02	16.0467	1.41444	0.000252749	0.00524203
ENSSSCG00000005269	129.924	209.524	212.203	517.936	561.52	616.84	2.79	3.67	3.7	10.31	10.65	11.3	3.38667	10.7533	1.66685	3.38e-09	8.08e-07
ENSSSCG00000005311	2320.42	2659.84	4295.8	1723.11	1234.52	1457.13	49.83	46.56	74.88	34.29	23.42	26.7	57.09	28.1367	-1.02079	1.4e-05	0.000580205
ENSSSCG00000005426	1216.09	1395.87	1126.53	2937.19	2593.77	2549.83	26.12	24.43	19.64	58.44	49.21	46.73	23.3967	51.46	1.13715	2.44e-08	3.99e-06
ENSSSCG00000005484	63.1958	108.338	115.345	161.578	264.705	219.912	1.36	1.9	2.01	3.22	5.02	4.03	1.75667	4.09	1.21926	0.00019871	0.00440268
ENSSSCG00000005589	96.8242	148.982	164.438	245.244	391.638	398.197	2.08	2.61	2.87	4.88	7.43	7.3	2.52	6.53667	1.37513	1.18e-05	0.000506
ENSSSCG00000005848	193.958	117.581	65.7127	64.9553	52.6324	35.088	4.17	2.06	1.15	1.29	1	0.64	2.46	0.976667	-1.33272	0.00365104	0.0369684
ENSSSCG00000006143	1381.89	1489.34	769.092	2546.54	2273.45	3856.85	29.68	26.07	13.41	50.67	43.13	70.68	23.0533	54.8267	1.2499	1.12e-05	0.00048608
ENSSSCG00000006191	306.816	403.935	271.85	706.284	971.07	1270.56	6.59	7.07	4.74	14.05	18.42	23.28	6.13333	18.5833	1.59927	1.06e-08	2e-06
ENSSSCG00000006194	1468.41	2155.89	1961.83	3309.97	3852.72	3887.96	31.53	37.74	34.2	65.86	73.09	71.25	34.49	70.0667	1.02255	9.43e-08	1.13e-05
ENSSSCG00000006199	190.851	388.455	335.384	572.789	664.527	773.745	4.1	6.8	5.85	11.4	12.61	14.18	5.58333	12.73	1.18903	2.84e-05	0.00101495
ENSSSCG00000006245	2044.45	1230.83	631.594	2429.43	2095.32	4593.1	43.9	21.55	11.01	48.34	39.75	84.18	25.4867	57.4233	1.17189	0.00325859	0.0341454
ENSSSCG00000006338	83.1209	243.046	188.886	406.891	524.694	561.519	1.79	4.25	3.29	8.1	9.95	10.29	3.11	9.44667	1.60289	2.85e-06	0.000172408
ENSSSCG00000006374	493.738	764.954	688.143	828.494	1788.48	1254.21	10.6	13.39	12	16.49	33.93	22.99	11.9967	24.47	1.02838	0.000187898	0.00424355
ENSSSCG00000006493	523.575	549.609	566.537	338.621	279.275	162.451	11.24	9.62	9.88	6.74	5.3	2.98	10.2467	5.00667	-1.03323	0.00146367	0.0197977
ENSSSCG00000006578	627.981	754.267	265.576	223.174	228.833	217.912	13.49	13.2	4.63	4.44	4.34	3.99	10.44	4.25667	-1.29433	0.000616192	0.0102512
ENSSSCG00000006762	1067.63	6309.27	8706.83	1626.54	1614.11	2833.95	22.93	110.44	151.78	32.36	30.62	51.94	95.05	38.3067	-1.31109	0.00453585	0.0426025
ENSSSCG00000006781	398.442	976.94	804.5	1175.87	1514.79	1646.43	8.56	17.1	14.02	23.4	28.74	30.17	13.2267	27.4367	1.05266	7.72e-05	0.00214865
ENSSSCG00000006923	642.79	1107.18	888.954	1196.58	4181.37	7587.2	13.8	19.38	15.5	23.81	79.32	139.05	16.2267	80.7267	2.31468	1.42e-07	1.62e-05
ENSSSCG00000006932	51662.1	54057.9	22108.8	166531	100947	153189	1109.45	946.26	385.4	3313.58	1915.03	2807.42	813.703	2678.68	1.71895	9.59e-07	6.86e-05
ENSSSCG00000006940	983.38	860.761	1654.27	599.152	482.714	399.897	21.12	15.07	28.84	11.92	9.16	7.33	21.6767	9.47	-1.19471	3.64e-05	0.00125506
ENSSSCG00000006979	246.971	340.96	257.05	384.059	753.253	578.698	5.3	5.97	4.48	7.64	14.29	10.61	5.25	10.8467	1.04686	0.000664687	0.0108548
ENSSSCG00000007034	239.953	432.446	306.633	922.692	1102.83	910.056	5.15	7.57	5.35	18.36	20.92	16.68	6.02333	18.6533	1.6308	4.08e-10	1.37e-07
ENSSSCG00000007324	407.816	755.029	583.213	1944.18	1195.2	1452.05	8.76	13.22	10.17	38.68	22.67	26.61	10.7167	29.32	1.45203	3.72e-08	5.62e-06
ENSSSCG00000007507	11324.4	6679.07	681.678	53822	14467.9	16992.3	243.19	116.91	11.88	1070.93	274.47	311.41	123.993	552.27	2.15511	0.00305464	0.0327125
ENSSSCG00000007508	948.065	1029.34	1022.07	1400.27	3503.74	6129.8	20.36	18.02	17.82	27.86	66.47	112.34	18.7333	68.89	1.87869	2.01e-07	2.09e-05
ENSSSCG00000007695	163.535	126.334	373.217	68.0039	86.874	35.3643	3.51	2.21	6.51	1.35	1.65	0.65	4.07667	1.21667	-1.74446	9.6e-05	0.00253929
ENSSSCG00000007861	6880.31	7734.29	9694.69	4631.11	2806.93	1615.39	147.75	135.39	169	92.15	53.25	29.6	150.713	58.3333	-1.36941	2.29e-05	0.000842027
ENSSSCG00000007977	142.254	41.9673	34.1071	15.8261	16.3649	14.8059	3.05	0.73	0.59	0.31	0.31	0.27	1.45667	0.296667	-2.29576	6.33e-05	0.00184864
ENSSSCG00000007978	6585.01	1429.46	3892.52	775.721	526.483	1290.88	141.41	25.02	67.85	15.43	9.99	23.66	78.0933	16.36	-2.25503	1.61e-06	0.000104316
ENSSSCG00000008124	11.998	76.7866	64.8158	44.3343	340.919	475.438	0.26	1.34	1.13	0.88	6.47	8.71	0.91	5.35333	2.5565	0.000191683	0.00431612
ENSSSCG00000008153	1096.61	1571.15	850.875	4969.29	2887.46	3342.06	23.55	27.5	14.83	98.88	54.78	61.25	21.96	71.6367	1.70582	6.79e-10	2.11e-07
ENSSSCG00000008213	210.107	311.56	203.741	221.463	1330.64	772.317	4.51	5.45	3.55	4.41	25.24	14.15	4.50333	14.6	1.6969	0.000284967	0.0057567
ENSSSCG00000008217	875.706	1264.85	1425.29	1116.79	4783.95	3178.13	18.81	22.14	24.85	22.22	90.75	58.24	21.9333	57.07	1.37961	0.000139891	0.00338678
ENSSSCG00000008228	715.896	960.449	209.686	1391.48	1339.51	1908.37	15.37	16.81	3.66	27.69	25.41	34.97	11.9467	29.3567	1.29708	0.0014587	0.019752
ENSSSCG00000008347	1358.22	2080.23	1009.91	3615.02	2459.73	3148	29.17	36.41	17.6	71.93	46.66	57.69	27.7267	58.76	1.08356	3.98e-05	0.00132371
ENSSSCG00000008449	3005.08	5666.76	3212.14	10347.1	6551.06	8656.24	64.53	99.19	55.99	205.88	124.28	158.64	73.2367	162.933	1.15364	2.03e-05	0.000771063
ENSSSCG00000008453	1940.94	3136.69	1243.9	4122.75	3712.94	4800.75	41.68	54.91	21.68	82.03	70.44	87.98	39.4233	80.15	1.02365	0.000261474	0.00536929
ENSSSCG00000008475	1018.95	1379.62	1126.17	2600.54	2154.87	2328.58	21.88	24.15	19.63	51.74	40.88	42.67	21.8867	45.0967	1.04297	2.68e-07	2.62e-05
ENSSSCG00000008496	1410.77	1652.41	1794.6	1889.4	3424.77	7936.64	30.3	28.92	31.28	37.59	64.97	145.45	30.1667	82.67	1.45441	5.13e-05	0.00159081
ENSSSCG00000008554	109.315	73.281	117.232	241.125	269.229	171.435	2.35	1.28	2.04	4.8	5.11	3.14	1.89	4.35	1.20263	0.000504813	0.00892771
ENSSSCG00000008555	413.294	159.112	209.611	642.858	658.596	502.511	8.88	2.79	3.65	12.79	12.49	9.21	5.10667	11.4967	1.17076	0.0030457	0.0326685
ENSSSCG00000008595	12484.5	9649.63	4427.04	58065.4	32478.7	73810.1	268.1	168.91	77.17	1155.36	616.14	1352.68	171.393	1041.39	2.60313	1.66e-10	6.9e-08
ENSSSCG00000008647	1109.82	1181.29	1324.11	1429.76	3465.17	6121.66	23.83	20.68	23.08	28.45	65.74	112.19	22.53	68.7933	1.61042	5.54e-06	0.000288213
ENSSSCG00000008648	339.589	458.766	402.009	684.076	3441.41	10604	7.29	8.03	7.01	13.61	65.29	194.33	7.44333	91.0767	3.61306	7e-09	1.43e-06
ENSSSCG00000008664	1198.39	1327.53	1208.25	2453.58	2620.2	2598.44	25.74	23.24	21.06	48.82	49.71	47.62	23.3467	48.7167	1.0612	4.04e-08	5.92e-06
ENSSSCG00000008748	2231.54	2211.19	1347.97	4721.2	3431.12	3985	47.92	38.71	23.5	93.94	65.09	73.03	36.71	77.3533	1.07529	2.97e-05	0.00105957
ENSSSCG00000008754	2733.36	3514.87	1799.95	4566.03	4892.78	9321.01	58.7	61.53	31.38	90.85	92.82	170.82	50.5367	118.163	1.22538	4.17e-05	0.00137306
ENSSSCG00000008803	744.866	1096.24	1301.35	1767.05	2495.63	2485.5	16	19.19	22.69	35.16	47.34	45.55	19.2933	42.6833	1.14557	1.81e-07	1.95e-05
ENSSSCG00000008838	448.483	375.44	338.184	1249.33	675.168	696.564	9.63	6.57	5.9	24.86	12.81	12.77	7.36667	16.8133	1.19052	0.000186702	0.00423751
ENSSSCG00000008866	251.629	544.766	289.202	562.325	847.083	1032.47	5.4	9.54	5.04	11.19	16.07	18.92	6.66	15.3933	1.20871	0.000123717	0.00309143
ENSSSCG00000008903	990.763	1326.92	867.087	3337.23	2664.79	2855.36	21.28	23.23	15.12	66.4	50.55	52.33	19.8767	56.4267	1.5053	1.26e-11	7.84e-09
ENSSSCG00000008935	65.992	20.8285	15.708	525.141	112.876	86.5391	1.42	0.36	0.27	10.45	2.14	1.59	0.683333	4.72667	2.79016	0.000109913	0.00282011
ENSSSCG00000008959	170.226	759.248	518.217	49.5813	48.5609	155.771	3.66	13.29	9.03	0.99	0.92	2.85	8.66	1.58667	-2.44837	2.08e-06	0.000131638
ENSSSCG00000008978	16.9695	59.1165	11.8786	71.4447	386.657	874.504	0.36	1.03	0.21	1.42	7.34	16.03	0.533333	8.26333	3.95361	1.38e-07	1.62e-05
ENSSSCG00000008995	756.969	625.095	500.294	2040.06	626.834	1518.52	16.26	10.94	8.72	40.59	11.89	27.83	11.9733	26.77	1.16079	0.00169404	0.0219819
ENSSSCG00000009050	213.309	494.084	400.371	456.552	1096.31	1092.05	4.58	8.65	6.98	9.08	20.8	20.01	6.73667	16.63	1.30368	0.000144459	0.00347868
ENSSSCG00000009090	1304.75	2105.78	1844.3	3227.83	4063.34	4590.21	28.02	36.86	32.15	64.23	77.08	84.12	32.3433	75.1433	1.21618	2.8e-09	7.25e-07
ENSSSCG00000009132	46448.9	66820.6	28492.8	151710	104539	155823	997.49	1169.67	496.69	3018.67	1983.17	2855.7	887.95	2619.18	1.56056	5.89e-07	4.85e-05
ENSSSCG00000009152	497.609	706.068	360.85	1234.18	1065.43	1186.87	10.69	12.36	6.29	24.56	20.21	21.75	9.78	22.1733	1.18092	1.59e-05	0.000627524
ENSSSCG00000009157	325.668	828.005	754.858	1351.86	1736.37	2399.3	6.99	14.49	13.16	26.9	32.94	43.97	11.5467	34.6033	1.58343	4.77e-08	6.68e-06
ENSSSCG00000009179	5734.53	9596.4	6220.41	18132.3	13345.2	22603.5	123.15	167.98	108.44	360.79	253.17	414.24	133.19	342.733	1.3636	1.43e-07	1.62e-05
ENSSSCG00000009216	9376.74	38999.4	54414.3	7859.27	6253.23	5356.85	201.37	682.67	948.56	156.38	118.63	98.17	610.867	124.393	-2.29595	6.41e-08	8.39e-06
ENSSSCG00000009250	1550.81	2111.43	1725.93	5404.01	3399.88	5016.9	33.3	36.96	30.09	107.53	64.5	91.94	33.45	87.99	1.39533	3.81e-10	1.32e-07
ENSSSCG00000009357	137.365	264.165	181.098	356.656	523.012	469.167	2.95	4.62	3.16	7.1	9.92	8.6	3.57667	8.54	1.25562	4.37e-05	0.00141474
ENSSSCG00000009498	622.463	498.677	940.224	2969.15	3067.86	2516.73	13.37	8.73	16.39	59.08	58.2	46.12	12.83	54.4667	2.08585	4.96e-17	1.23e-13
ENSSSCG00000009513	7078.12	9815.61	4573.72	20047.6	11674.8	15116.3	152	171.82	79.73	398.9	221.48	277.03	134.517	299.137	1.15302	0.000155181	0.00367124
ENSSSCG00000009594	3162.75	4600.53	3659.65	7108.9	7330.72	9168.67	67.92	80.53	63.8	141.45	139.07	168.03	70.75	149.517	1.0795	5.26e-07	4.46e-05
ENSSSCG00000009650	1100.73	1936.99	1575.55	2567.55	3197.39	3393.9	23.64	33.91	27.47	51.09	60.66	62.2	28.34	57.9833	1.0328	5.74e-07	4.76e-05
ENSSSCG00000009666	2043.16	1021.83	1374.75	10003.5	7259.07	5186	43.88	17.89	23.96	199.05	137.71	95.04	28.5767	143.933	2.33249	4.28e-12	3.13e-09
ENSSSCG00000009682	239.059	330.872	416.921	777.142	676.789	825.228	5.13	5.79	7.27	15.46	12.84	15.12	6.06333	14.4733	1.25521	2.04e-06	0.000129733
ENSSSCG00000009683	229.844	590.31	612.537	972.305	1241.86	1286.41	4.94	10.33	10.68	19.35	23.56	23.58	8.65	22.1633	1.3574	4.48e-06	0.000244324
ENSSSCG00000009720	1012.67	1285.99	804.472	2645.55	7736.61	10882.9	21.75	22.51	14.02	52.64	146.77	199.45	19.4267	132.953	2.77481	4.5e-13	5.09e-10
ENSSSCG00000009852	1329.08	1462.97	1038.15	2506.39	2766.4	2519.23	28.54	25.61	18.1	49.87	52.48	46.17	24.0833	49.5067	1.03959	1.17e-06	8.07e-05
ENSSSCG00000009881	2246.88	2124.93	2195.4	2034.23	7273.97	18772.9	48.25	37.2	38.27	40.48	137.99	344.04	41.24	174.17	2.07838	4.47e-05	0.00143639
ENSSSCG00000010039	832.769	484.17	439.906	1828.67	2039.72	2028.3	17.88	8.48	7.67	36.39	38.69	37.17	11.3433	37.4167	1.72184	6.09e-09	1.27e-06
ENSSSCG00000010052	5384.91	5589.14	3874.52	13175	9194.19	7442.64	115.64	97.84	67.54	262.15	174.42	136.4	93.6733	190.99	1.02779	0.000268414	0.00546669
ENSSSCG00000010087	110.164	147.83	92.9183	336.93	176.522	255.556	2.37	2.59	1.62	6.7	3.35	4.68	2.19333	4.91	1.1626	0.000916986	0.013882
ENSSSCG00000010099	539.478	2291.57	6240.2	328.698	996.612	951.225	11.59	40.11	108.78	6.54	18.91	17.43	53.4933	14.2933	-1.90402	0.000839856	0.0129186
ENSSSCG00000010151	931.127	2454.26	2088.7	2634.37	4256.77	3995.47	20	42.96	36.41	52.42	80.75	73.22	33.1233	68.7967	1.05449	0.000115461	0.00292628
ENSSSCG00000010212	1866.47	2023.9	1608.8	3330.16	4280.38	4179.07	40.08	35.43	28.04	66.26	81.2	76.59	34.5167	74.6833	1.11349	6.67e-08	8.5e-06
ENSSSCG00000010400	3717.93	8895.81	8398.05	1934.44	4045.24	3720.42	79.84	155.72	146.4	38.49	76.74	68.18	127.32	61.1367	-1.05835	0.000353856	0.00679534
ENSSSCG00000010429	207.305	416.84	220.426	838.835	734.594	923.211	4.45	7.3	3.84	16.69	13.94	16.92	5.19667	15.85	1.60882	6.69e-08	8.5e-06
ENSSSCG00000010431	978.007	1621.36	911.753	2491.14	2536.9	4353.94	21	28.38	15.89	49.57	48.13	79.79	21.7567	59.1633	1.44325	3.84e-08	5.69e-06
ENSSSCG00000010432	5.13744	2.01791	11.9859	9.02575	8.01398	592.043	0.11	0.04	0.21	0.18	0.15	10.85	0.12	3.72667	4.95678	0.00011767	0.00297015
ENSSSCG00000010451	1184.72	1735.7	2279.76	1968.99	5506.11	11861.4	25.44	30.38	39.74	39.18	104.45	217.38	31.8533	120.337	1.91756	9.7e-06	0.000438827
ENSSSCG00000010452	1573.27	2298.88	1847.42	2269.82	9860.82	23779.8	33.79	40.24	32.2	45.16	187.07	435.8	35.41	222.677	2.65272	7.72e-07	5.79e-05
ENSSSCG00000010454	768.229	893.711	888.059	1313.88	3381.57	5644.76	16.5	15.64	15.48	26.14	64.15	103.45	15.8733	64.58	2.02448	1.7e-08	2.95e-06
ENSSSCG00000010497	452.127	1029.03	1196.4	1056.33	2159.5	2173.83	9.71	18.01	20.86	21.02	40.97	39.84	16.1933	33.9433	1.06773	0.000564662	0.0096229
ENSSSCG00000010543	904.248	246.216	250.055	2812.93	741.724	1029.02	19.42	4.31	4.36	55.97	14.07	18.86	9.36333	29.6333	1.66213	0.00336588	0.0349625
ENSSSCG00000010604	460.137	1069.92	691.629	1694.63	1459.52	1580.37	9.88	18.73	12.06	33.72	27.69	28.96	13.5567	30.1233	1.15188	6.93e-06	0.000340749
ENSSSCG00000010648	1731.62	4099.58	3009.04	5973.98	5631.55	6683.39	37.19	71.76	52.45	118.87	106.83	122.48	53.8	116.06	1.10919	3.61e-06	0.00021008
ENSSSCG00000010840	411.772	412.53	190.309	570.467	765.764	740.372	8.84	7.22	3.32	11.35	14.53	13.57	6.46	13.15	1.02546	0.00238717	0.028051
ENSSSCG00000010885	256.524	322.286	234.639	384.871	650.633	818.504	5.51	5.64	4.09	7.66	12.34	15	5.08	11.6667	1.19949	0.000145042	0.00348259
ENSSSCG00000010992	1270.46	1199.66	388.578	2751.56	2534.86	1922.14	27.28	21	6.77	54.75	48.09	35.23	18.35	46.0233	1.32659	0.000378003	0.00715962
ENSSSCG00000011030	12837	7862	3088.68	31553.9	15082.1	21251.3	275.68	137.62	53.84	627.85	286.12	389.46	155.713	434.477	1.48039	0.000994117	0.0147271
ENSSSCG00000011037	2407.61	2518.04	1705.78	2966.45	4930.58	6181.62	51.7	44.08	29.74	59.03	93.54	113.29	41.84	88.62	1.08275	4.77e-05	0.00151
ENSSSCG00000011064	2559.46	3292.55	2404.12	6649.66	5573.26	5805.08	54.96	57.63	41.91	132.31	105.73	106.39	51.5	114.81	1.1566	3.32e-08	5.22e-06
ENSSSCG00000011147	221.429	23.8328	128.483	1560.08	206.925	292.08	4.76	0.42	2.24	31.04	3.93	5.35	2.47333	13.44	2.442	0.00179491	0.0227917
ENSSSCG00000011239	2093.01	3299.21	3222.11	3896.84	6485.81	9122.24	44.95	57.75	56.17	77.54	123.04	167.18	52.9567	122.587	1.21092	3.96e-06	0.000225939
ENSSSCG00000011363	933.105	2273.46	2084.03	3430.46	3492.8	3436.76	20.04	39.8	36.33	68.26	66.26	62.98	32.0567	65.8333	1.03819	2.31e-05	0.000847985
ENSSSCG00000011368	1541.7	1682.1	2116.42	608.106	1232.73	711.831	33.11	29.44	36.89	12.1	23.39	13.05	33.1467	16.18	-1.03465	8.63e-05	0.00233527
ENSSSCG00000011425	28.8568	366.351	494.226	734.428	828.632	982.332	0.62	6.41	8.62	14.61	15.72	18	5.21667	16.11	1.62676	0.00493004	0.044837
ENSSSCG00000011485	834.489	1364.03	895.613	2329.93	1965.32	2162.99	17.92	23.88	15.61	46.36	37.28	39.64	19.1367	41.0933	1.10256	6.32e-07	5.1e-05
ENSSSCG00000011680	16984.6	19665.1	12762.3	33117.7	31870.1	41512	364.74	344.23	222.47	658.96	604.6	760.77	310.48	674.777	1.11991	7.94e-06	0.0003813
ENSSSCG00000011723	13690.5	11177.2	5464.72	19503.8	16715.1	25523	294	195.65	95.26	388.08	317.1	467.75	194.97	390.977	1.00383	0.00264518	0.0300395
ENSSSCG00000011735	69079	79498.5	50303.6	178578	165559	206417	1483.48	1391.59	876.9	3553.28	3140.77	3782.91	1250.66	3492.32	1.4815	8.36e-09	1.65e-06
ENSSSCG00000011760	463.938	1544.85	1731.85	2018.39	2452.6	2712.47	9.96	27.04	30.19	40.16	46.53	49.71	22.3967	45.4667	1.02153	0.00137822	0.0189929
ENSSSCG00000011811	204.272	318.072	444.841	629.752	908.673	778.961	4.39	5.57	7.75	12.53	17.24	14.28	5.90333	14.6833	1.31458	5.61e-06	0.000289582
ENSSSCG00000011851	496.018	737.637	703.097	180.488	334.234	312.003	10.65	12.91	12.26	3.59	6.34	5.72	11.94	5.21667	-1.1946	5.5e-05	0.00165855
ENSSSCG00000011874	1555.1	3046.56	2070.15	2983.68	6470.03	9837.82	33.4	53.33	36.09	59.37	122.74	180.29	40.94	120.8	1.56104	2.29e-06	0.000142768
ENSSSCG00000011875	6722.92	14999.7	8671.55	24334.9	25985.3	39704.3	144.38	262.56	151.16	484.21	492.96	727.64	186.033	568.27	1.61102	1.94e-08	3.27e-06
ENSSSCG00000011876	1046.39	1336.93	754.226	1691.19	1963.94	3183.78	22.47	23.4	13.15	33.65	37.26	58.35	19.6733	43.0867	1.131	3.61e-05	0.00125081
ENSSSCG00000011962	4403.58	5786.3	4572.75	10876.7	9795.83	13219.9	94.57	101.29	79.71	216.42	185.83	242.28	91.8567	214.843	1.22583	3.68e-08	5.62e-06
ENSSSCG00000011973	557.445	1642.73	1621.08	6311.17	3247.87	3331.6	11.97	28.76	28.26	125.58	61.61	61.06	22.9967	82.75	1.84733	9.2e-08	1.11e-05
ENSSSCG00000012006	880.677	923.867	513.756	2384.85	1612.05	1897.57	18.91	16.17	8.96	47.45	30.58	34.78	14.68	37.6033	1.35701	1.32e-06	8.89e-05
ENSSSCG00000012019	24.0091	29.9054	21.4183	43.4287	60.9608	173.88	0.52	0.52	0.37	0.86	1.16	3.19	0.47	1.73667	1.88559	9.35e-05	0.00249573
ENSSSCG00000012029	1767.91	3219.91	2239.8	3702.02	5171.6	5953.8	37.97	56.36	39.04	73.66	98.11	109.11	44.4567	93.6267	1.07452	2.44e-06	0.000151002
ENSSSCG00000012076	1400.11	2228.46	1853.34	1987.06	6242.67	12175	30.07	39.01	32.31	39.54	118.43	223.13	33.7967	127.033	1.91025	7.19e-06	0.000352357
ENSSSCG00000012077	2294.55	3135.04	2194.11	2616.21	8623.91	19339.7	49.28	54.88	38.25	52.06	163.6	354.43	47.47	190.03	2.00114	2.2e-05	0.000827186
ENSSSCG00000012138	14189.8	12314.6	6744.67	29037.9	18471	24033.5	304.73	215.56	117.57	577.79	350.41	440.45	212.62	456.217	1.10144	0.000541093	0.00940413
ENSSSCG00000012236	3738.39	2281.76	2616.58	4734.96	7394.39	6916.03	80.28	39.94	45.61	94.21	140.28	126.75	55.2767	120.413	1.12325	3.29e-05	0.00115465
ENSSSCG00000012283	66.9481	207.855	284.187	396.218	538.915	550.701	1.44	3.64	4.95	7.88	10.22	10.09	3.34333	9.39667	1.49086	0.000144027	0.00347868
ENSSSCG00000012315	1099.25	1268.58	820.258	3621.76	2403.5	1807.92	23.61	22.21	14.3	72.06	45.6	33.13	20.04	50.2633	1.32662	3.54e-06	0.000207148
ENSSSCG00000012347	284.268	69.0954	122.522	30.5362	33.5939	36.3151	6.1	1.21	2.14	0.61	0.64	0.67	3.15	0.64	-2.29921	7.3e-06	0.000356207
ENSSSCG00000012352	37.6592	109.019	92.0256	133.582	199.986	189.089	0.81	1.91	1.6	2.66	3.79	3.47	1.44	3.30667	1.19931	0.00101799	0.0149364
ENSSSCG00000012363	2917.08	2680.13	1703.28	5989.26	6027.73	6002.5	62.64	46.91	29.69	119.17	114.35	110	46.4133	114.507	1.30282	1.89e-07	2.01e-05
ENSSSCG00000012402	157.204	154.728	56.9616	180.32	540.304	342.254	3.38	2.71	0.99	3.59	10.25	6.27	2.36	6.70333	1.50609	0.00114393	0.0162873
ENSSSCG00000012542	211.775	557.944	488.97	774.541	867.679	1060.52	4.55	9.77	8.52	15.41	16.46	19.44	7.61333	17.1033	1.16768	8.17e-05	0.00224072
ENSSSCG00000012557	26.5213	31.304	13.8972	31.7093	49.9951	114.528	0.57	0.55	0.24	0.63	0.95	2.1	0.453333	1.22667	1.4361	0.00273793	0.0305358
ENSSSCG00000012608	281.494	680.909	738.923	961.304	1129.32	1240.3	6.05	11.92	12.88	19.13	21.42	22.73	10.2833	21.0933	1.03648	0.000303187	0.00604625
ENSSSCG00000012853	1723.2	1977.8	1693.2	1678.62	4968.36	8610.26	37.01	34.62	29.52	33.4	94.25	157.8	33.7167	95.15	1.49674	0.000106659	0.00274796
ENSSSCG00000013010	63330.6	44595.4	17184.7	159566	62214.3	147448	1360.03	780.62	299.57	3174.98	1180.25	2702.21	813.407	2352.48	1.53213	0.000749427	0.0118199
ENSSSCG00000013073	3190.85	3441.88	4275.87	2488.41	1658.71	762.508	68.52	60.25	74.54	49.51	31.47	13.97	67.77	31.65	-1.09844	0.00102547	0.01496
ENSSSCG00000013231	6.42279	14.7778	8.17445	4.08986	3.09485	1.0731	0.14	0.26	0.14	0.08	0.06	0.02	0.18	0.0533333	-1.75489	0.00565909	0.0491433
ENSSSCG00000013337	3.01431	8.89111	3.92608	28.5679	28.5914	18.6276	0.06	0.16	0.07	0.57	0.54	0.34	0.0966667	0.483333	2.32193	4.28e-06	0.000235827
ENSSSCG00000013338	16088.8	11720.9	4705.13	40049.5	27140.7	31503.1	345.51	205.17	82.02	796.89	514.88	577.34	210.9	629.703	1.57811	6.15e-05	0.00180357
ENSSSCG00000013399	217.952	506.653	475.11	965.111	1232.18	1098.13	4.68	8.87	8.28	19.2	23.38	20.12	7.27667	20.9	1.52215	4.59e-08	6.57e-06
ENSSSCG00000013501	5186.83	4717.87	3376.14	17708.8	5102.32	9374.14	111.39	82.58	58.85	352.36	96.79	171.8	84.2733	206.983	1.29637	0.000705536	0.0112995
ENSSSCG00000013566	481.668	617.763	539.531	1177.02	1239.06	1059.04	10.34	10.81	9.41	23.42	23.51	19.41	10.1867	22.1133	1.11823	1.03e-06	7.3e-05
ENSSSCG00000014008	36.2333	65.2983	56.0473	23.8342	10.4557	15.1905	0.78	1.14	0.98	0.47	0.2	0.28	0.966667	0.316667	-1.61005	7.71e-05	0.00214865
ENSSSCG00000014055	16968	14491.6	7830.47	36555.9	22455.5	29159.2	364.39	253.67	136.5	727.38	426	534.39	251.52	562.59	1.16141	0.000380337	0.00718197
ENSSSCG00000014112	75.6539	247.466	197.075	640.324	690.301	572.063	1.62	4.33	3.44	12.74	13.1	10.48	3.13	12.1067	1.95157	3.75e-08	5.62e-06
ENSSSCG00000014117	404.76	492.538	499.115	136.666	166.626	144.557	8.69	8.62	8.7	2.72	3.16	2.65	8.67	2.84333	-1.60845	1.31e-08	2.4e-06
ENSSSCG00000014137	585.903	617.967	457.954	848.693	1314.09	1284.37	12.58	10.82	7.98	16.89	24.93	23.54	10.46	21.7867	1.05856	5.05e-05	0.00157481
ENSSSCG00000014173	1258.32	3318.11	4408.08	5414.85	7868.63	7006.33	27.02	58.08	76.84	107.74	149.27	128.4	53.98	128.47	1.25093	5.07e-05	0.00157881
ENSSSCG00000014187	938.379	1264.74	774.497	2273.93	1951.37	2438.51	20.15	22.14	13.5	45.25	37.02	44.69	18.5967	42.32	1.1863	2.35e-07	2.33e-05
ENSSSCG00000014207	1532.65	2699.11	2570.28	3946.25	4805.62	4930.16	32.91	47.25	44.81	78.52	91.17	90.35	41.6567	86.68	1.05715	2.85e-07	2.72e-05
ENSSSCG00000014291	549.654	1641.22	1413.74	2417.06	2859.04	2963.4	11.8	28.73	24.64	48.09	54.24	54.31	21.7233	52.2133	1.26517	4.74e-06	0.000256628
ENSSSCG00000014554	6.35581	2.7597	5.01304	4.97682	38.7986	10.9216	0.14	0.05	0.09	0.1	0.74	0.2	0.0933333	0.346667	1.89308	0.00306907	0.0328106
ENSSSCG00000014725	15647.1	3506.61	7292.95	1273.02	1060.46	2491.21	336.02	61.38	127.13	25.33	20.12	45.66	174.843	30.37	-2.52534	2.1e-07	2.15e-05
ENSSSCG00000014976	294.268	563.375	434.409	1085.45	941.078	1122.77	6.32	9.86	7.57	21.6	17.85	20.58	7.91667	20.01	1.33776	1.29e-07	1.53e-05
ENSSSCG00000015010	525.684	926.394	461.74	1823.5	2383.72	2549.39	11.29	16.22	8.05	36.28	45.22	46.72	11.8533	42.74	1.85029	1.56e-12	1.41e-09
ENSSSCG00000015036	86.5904	197.45	186.19	229.064	390.971	292.611	1.86	3.46	3.25	4.56	7.42	5.36	2.85667	5.78	1.01674	0.0028196	0.0310781
ENSSSCG00000015069	455.823	245.427	331.227	1514.13	668.631	2551.94	9.79	4.3	5.77	30.13	12.68	46.77	6.62	29.86	2.17331	1.62e-07	1.82e-05
ENSSSCG00000015091	202.087	463.505	550.459	919.862	897.609	971.664	4.34	8.11	9.6	18.3	17.03	17.81	7.35	17.7133	1.26902	1.56e-05	0.000621938
ENSSSCG00000015144	701.776	1211.49	890.691	4088.14	2246.51	2621.66	15.07	21.21	15.53	81.34	42.62	48.05	17.27	57.3367	1.73119	4.54e-11	2.09e-08
ENSSSCG00000015238	207.845	449.135	407.465	913.853	950.486	933.727	4.46	7.86	7.1	18.18	18.03	17.11	6.47333	17.7733	1.45713	7.11e-08	8.94e-06
ENSSSCG00000015310	3520.4	5727.81	4640.25	8651.64	9339.65	10352.5	75.6	100.26	80.89	172.15	177.18	189.73	85.5833	179.687	1.07008	7.82e-07	5.82e-05
ENSSSCG00000015334	854.772	989.817	1005.47	5645.49	1436.04	875.517	18.36	17.33	17.53	112.33	27.24	16.05	17.74	51.8733	1.54799	0.00188216	0.0235157
ENSSSCG00000015375	964.733	1469.77	983.44	3468.39	2645.07	3430.52	20.72	25.73	17.14	69.01	50.18	62.87	21.1967	60.6867	1.51754	5.43e-12	3.75e-09
ENSSSCG00000015396	166.86	332.81	211.113	462.235	653.086	716.247	3.58	5.83	3.68	9.2	12.39	13.13	4.36333	11.5733	1.4073	4.92e-06	0.00026376
ENSSSCG00000015402	496.151	792.435	552.93	942.756	1134.96	1656.78	10.65	13.87	9.64	18.76	21.53	30.36	11.3867	23.55	1.04838	5.28e-05	0.00161292
ENSSSCG00000015405	2102.3	3564.58	2614.28	3504.32	5372.89	7557.6	45.15	62.4	45.57	69.73	101.93	138.5	51.04	103.387	1.01835	6.3e-05	0.00184488
ENSSSCG00000015549	1624.21	3016.58	1519.03	3958.58	4670.44	5810.94	34.88	52.8	26.48	78.77	88.6	106.49	38.0533	91.2867	1.26238	5.16e-07	4.4e-05
ENSSSCG00000015584	41.3049	180.118	89.2567	242.232	223.41	275.7	0.89	3.15	1.56	4.82	4.24	5.05	1.86667	4.70333	1.33322	0.00109622	0.015734
ENSSSCG00000015590	1787.66	2545.48	1867.68	9908.97	5014.09	4833.25	38.39	44.56	32.56	197.16	95.12	88.58	38.5033	126.953	1.72124	3.28e-09	8.08e-07
ENSSSCG00000015661	1205.74	3959.19	2660.38	721.27	875.172	1710.34	25.89	69.3	46.38	14.35	16.6	31.34	47.19	20.7633	-1.18444	0.000595251	0.00999635
ENSSSCG00000015743	400.192	684.329	444.034	824.88	1238.79	1301.27	8.59	11.98	7.74	16.41	23.5	23.85	9.43667	21.2533	1.17134	9.59e-06	0.000435349
ENSSSCG00000015801	521.774	868.583	826.973	1243.71	2518.23	2201.91	11.21	15.2	14.42	24.75	47.77	40.35	13.61	37.6233	1.46696	1.68e-08	2.94e-06
ENSSSCG00000015818	1375.67	2062.41	1535.12	3114.22	3330.76	3890.17	29.54	36.1	26.76	61.97	63.19	71.29	30.8	65.4833	1.0882	6.49e-08	8.41e-06
ENSSSCG00000015851	579.481	1254.66	999.247	1689.12	2041.03	1947.46	12.44	21.96	17.42	33.61	38.72	35.69	17.2733	36.0067	1.05972	6.1e-06	0.000309821
ENSSSCG00000015897	1261.56	1843.63	1575.66	2254.26	3036.13	5462.17	27.09	32.27	27.47	44.85	57.6	100.1	28.9433	67.5167	1.22201	5.52e-06	0.000288213
ENSSSCG00000015965	597.024	889.191	775.637	1308.42	1570.89	1867.27	12.82	15.56	13.52	26.03	29.8	34.22	13.9667	30.0167	1.10378	3.7e-07	3.34e-05
ENSSSCG00000016057	14145.6	18489.6	19992.4	17134	40855.1	50124	303.78	323.65	348.51	340.93	775.05	918.6	325.313	678.193	1.05987	0.00068994	0.0111501
ENSSSCG00000016104	3827.94	2728.85	2070.01	6154.74	7103.26	5353.16	82.21	47.77	36.08	122.46	134.75	98.1	55.3533	118.437	1.09737	7.73e-05	0.00214865
ENSSSCG00000016113	516.806	1358.47	1159.53	3654.24	3571.62	3942.64	11.1	23.78	20.21	72.71	67.76	72.25	18.3633	70.9067	1.94909	3.08e-14	3.83e-11
ENSSSCG00000016119	60.2553	266.292	220.5	1077.63	696.97	846.97	1.29	4.66	3.84	21.44	13.22	15.52	3.26333	16.7267	2.35773	5.46e-09	1.19e-06
ENSSSCG00000016123	250.237	312.771	237.227	813.057	813.471	820.12	5.37	5.47	4.14	16.18	15.43	15.03	4.99333	15.5467	1.63853	3.29e-10	1.21e-07
ENSSSCG00000016125	161.297	335.199	396.541	557.186	645.216	759.505	3.46	5.87	6.91	11.09	12.24	13.92	5.41333	12.4167	1.19769	9.56e-05	0.00253553
ENSSSCG00000016140	3835.31	4124.91	2641.17	7612.64	6353.81	7588.38	82.36	72.2	46.04	151.47	120.54	139.07	66.8667	137.027	1.0351	1.7e-05	0.000666824
ENSSSCG00000016159	17017.2	16506.3	16544.2	23522.8	34173.4	44893.3	365.44	288.94	288.4	468.05	648.29	822.74	314.26	646.36	1.04038	4.93e-05	0.00154618
ENSSSCG00000016254	1518.91	3357.89	1551.15	379.86	378.46	885.254	32.62	58.78	27.04	7.56	7.18	16.22	39.48	10.32	-1.93568	3.44e-08	5.36e-06
ENSSSCG00000016487	1741	2114.5	1490.97	3412.64	4295.22	5374.1	37.39	37.01	25.99	67.9	81.48	98.49	33.4633	82.6233	1.30397	4.58e-09	1.04e-06
ENSSSCG00000016609	6043.91	5390.02	2513.23	16136	12235.1	13994.3	129.79	94.35	43.81	321.07	232.11	256.47	89.3167	269.883	1.59533	1.17e-06	8.07e-05
ENSSSCG00000016639	205.766	279.632	181.358	517.9	453.624	521.562	4.42	4.89	3.16	10.3	8.61	9.56	4.15667	9.49	1.19098	4.32e-05	0.00141216
ENSSSCG00000016686	3522.71	3119.15	1472.14	6567.87	5508.5	5170.12	75.65	54.6	25.66	130.68	104.5	94.75	51.97	109.977	1.08145	0.000498632	0.00888965
ENSSSCG00000016716	1737.54	1186.89	585.352	3600.38	3583.1	2668.93	37.31	20.78	10.2	71.64	67.97	48.91	22.7633	62.84	1.46497	2.99e-05	0.0010639
ENSSSCG00000016830	201.108	269.035	178.023	803.875	727.483	1317.6	4.32	4.71	3.1	16	13.8	24.15	4.04333	17.9833	2.15304	1.26e-12	1.3e-09
ENSSSCG00000016834	455.247	970.892	928.26	1595.53	1544.18	1766.17	9.78	17	16.18	31.75	29.29	32.37	14.32	31.1367	1.12058	4e-06	0.00022691
ENSSSCG00000016843	119.28	329.336	325.437	416.395	504.922	605.235	2.56	5.76	5.67	8.29	9.58	11.09	4.66333	9.65333	1.04967	0.00201643	0.0247216
ENSSSCG00000016850	223.085	657.848	634.354	1086.11	1447.24	1366.15	4.79	11.52	11.06	21.61	27.46	25.04	9.12333	24.7033	1.43707	3.19e-06	0.000190926
ENSSSCG00000016885	341.863	692.17	582.254	1070.8	1589.61	1630.98	7.34	12.12	10.15	21.31	30.16	29.89	9.87	27.12	1.45824	1.76e-08	3e-06
ENSSSCG00000016887	340.221	729.042	772.309	1113.27	1461.7	1413.19	7.31	12.76	13.46	22.15	27.73	25.9	11.1767	25.26	1.17636	9.17e-06	0.000425568
ENSSSCG00000016894	180.479	309.999	328.06	726.515	484.206	710.233	3.88	5.43	5.72	14.46	9.19	13.02	5.01	12.2233	1.28676	1.57e-05	0.000624096
ENSSSCG00000016901	83.1788	64.5446	94.4765	113.43	468.181	528.758	1.79	1.13	1.65	2.26	8.88	9.69	1.52333	6.94333	2.1884	3.67e-06	0.000212559
ENSSSCG00000016902	1387.64	2679.33	866.544	4683.23	10273.5	12369.5	29.8	46.9	15.11	93.19	194.9	226.69	30.6033	171.593	2.48723	1.64e-10	6.9e-08
ENSSSCG00000016903	399.891	861.024	502.697	1159.95	3397.28	3802.71	8.59	15.07	8.76	23.08	64.45	69.69	10.8067	52.4067	2.27783	3.73e-10	1.32e-07
ENSSSCG00000016986	150.481	490.329	458.467	961.576	1002.11	1136.63	3.23	8.58	7.99	19.13	19.01	20.83	6.6	19.6567	1.57448	1.33e-06	8.97e-05
ENSSSCG00000017068	1836.07	2164.22	796.692	2646.55	3033.25	4104.2	39.43	37.88	13.89	52.66	57.54	75.22	30.4	61.8067	1.02369	0.00127426	0.0178172
ENSSSCG00000017095	232.387	269.323	269.327	740.053	998.924	825.814	4.99	4.71	4.69	14.73	18.95	15.13	4.79667	16.27	1.76211	1.07e-11	6.98e-09
ENSSSCG00000017120	10975	9735.45	7433.49	24554.7	14591.6	18009.7	235.69	170.41	129.58	488.58	276.81	330.06	178.56	365.15	1.03208	0.000253274	0.00524416
ENSSSCG00000017146	2878.77	5987.01	6463.17	7462	14151.2	26542.4	61.82	104.8	112.67	148.48	268.46	486.43	93.0967	301.123	1.69355	3.93e-06	0.000225099
ENSSSCG00000017296	7008.07	4441.02	4218.52	12131.3	10334.9	17251.7	150.5	77.74	73.54	241.38	196.06	316.16	100.593	251.2	1.3203	9.75e-06	0.000439412
ENSSSCG00000017307	98.046	119.336	83.6874	24.6688	43.7598	22.8741	2.11	2.09	1.46	0.49	0.83	0.42	1.88667	0.58	-1.70171	6.22e-06	0.000314501
ENSSSCG00000017416	1151.65	1096.08	1161.95	1075.03	2927.07	4926.6	24.73	19.19	20.26	21.39	55.53	90.29	21.3933	55.7367	1.38147	0.000169715	0.0039507
ENSSSCG00000017517	151.645	227.133	58.8908	214.741	670.517	476.616	3.26	3.98	1.03	4.27	12.72	8.73	2.75667	8.57333	1.63693	0.000661333	0.0108278
ENSSSCG00000017567	245.083	217.065	250.917	98.371	60.4045	115.838	5.26	3.8	4.37	1.96	1.15	2.12	4.47667	1.74333	-1.36058	5.48e-05	0.00165855
ENSSSCG00000017696	1808.34	1966.87	1054.37	2711.71	3885.5	3706.9	38.83	34.43	18.38	53.96	73.71	67.93	30.5467	65.2	1.09386	3.29e-05	0.00115465
ENSSSCG00000017700	34.3032	51.2535	38.1266	140.171	226.859	241.687	0.74	0.9	0.66	2.79	4.3	4.43	0.766667	3.84	2.32443	3.74e-11	1.79e-08
ENSSSCG00000017705	3385.38	5315.23	3682.56	6758.74	13728.1	7728.76	72.7	93.04	64.19	134.48	260.43	141.64	76.6433	178.85	1.22252	1.28e-05	0.000539297
ENSSSCG00000017727	3790.7	2907.72	2747.17	10421.3	8993.02	8455.71	81.41	50.9	47.89	207.36	170.6	154.96	60.0667	177.64	1.56432	7.6e-10	2.31e-07
ENSSSCG00000017797	1438.23	687.841	420.391	2617.96	2961.86	1804.42	30.89	12.04	7.33	52.09	56.19	33.07	16.7533	47.1167	1.49179	0.000217383	0.00470454
ENSSSCG00000017861	294.647	131.32	161.933	593.922	826.076	528.947	6.33	2.3	2.82	11.82	15.67	9.69	3.81667	12.3933	1.69918	1e-05	0.000449494
ENSSSCG00000017886	601.973	598.816	753.416	659.76	2636.33	3931.42	12.93	10.48	13.13	13.13	50.01	72.05	12.18	45.0633	1.88744	8.84e-06	0.000416917
ENSSSCG00000020663	2073.35	4108.43	4331.94	6160.59	6312.43	8495.12	44.53	71.92	75.52	122.58	119.75	155.69	63.99	132.673	1.05196	1.15e-05	0.000496426
ENSSSCG00000020872	74.4373	215.51	2667.33	39.5151	71.0599	65.3523	1.6	3.77	46.5	0.79	1.35	1.2	17.29	1.11333	-3.95698	9.07e-06	0.000424055
ENSSSCG00000020927	1983.62	2190.01	756.713	6005.51	5018.01	6750.94	42.6	38.34	13.19	119.5	95.19	123.72	31.3767	112.803	1.84605	5.31e-08	7.26e-06
ENSSSCG00000021072	139.43	533.504	508.793	984.438	1144.74	1119.37	2.99	9.34	8.87	19.59	21.72	20.51	7.06667	20.6067	1.54401	1.04e-05	0.000460512
ENSSSCG00000021208	117112	174255	91754.5	386640	293029	325637	2514.99	3050.25	1599.48	7693.2	5558.95	5967.8	2388.24	6406.65	1.42362	2.54e-07	2.51e-05
ENSSSCG00000021414	86.5632	32.7791	43.6895	143.034	231.296	166.824	1.86	0.57	0.76	2.85	4.39	3.06	1.06333	3.43333	1.69102	7.34e-05	0.00208615
ENSSSCG00000021562	178.011	578.727	706.78	849.48	1206.55	930.697	3.82	10.13	12.32	16.9	22.89	17.06	8.75667	18.95	1.11374	0.00161665	0.0212884
ENSSSCG00000021606	644.06	623.725	401.74	815.58	1470.35	1291.83	13.83	10.92	7	16.23	27.89	23.67	10.5833	22.5967	1.09432	0.000199965	0.00440268
ENSSSCG00000021612	195.052	246.462	236.674	360.936	466.161	554.329	4.19	4.31	4.13	7.18	8.84	10.16	4.21	8.72667	1.05161	0.000200251	0.00440268
ENSSSCG00000021657	592.609	663.893	435.409	1289.29	1121.23	1113.54	12.73	11.62	7.59	25.65	21.27	20.41	10.6467	22.4433	1.07589	2.78e-05	0.00099844
ENSSSCG00000021712	3251.28	4942.89	4257.44	3854.64	11974.5	18107.8	69.82	86.52	74.22	76.7	227.16	331.85	76.8533	211.903	1.46323	0.000133559	0.00326525
ENSSSCG00000021813	7536.54	4955.18	3535.78	23637.8	12359.4	11840.8	161.85	86.74	61.64	470.34	234.47	217	103.41	307.27	1.57113	1.65e-05	0.000648241
ENSSSCG00000021910	15.792	23.4408	59.5634	178.511	100.826	71.7858	0.34	0.41	1.04	3.55	1.91	1.32	0.596667	2.26	1.92133	6.38e-05	0.00185765
ENSSSCG00000021968	644.281	851.093	625.304	1168.31	1667.72	1534.95	13.84	14.9	10.9	23.25	31.64	28.13	13.2133	27.6733	1.0665	3.44e-06	0.000203874
ENSSSCG00000022092	38.42	122.353	90.8429	109.984	182.962	237.414	0.83	2.14	1.58	2.19	3.47	4.35	1.51667	3.33667	1.1375	0.00414067	0.040161
ENSSSCG00000022226	69.2842	98.741	77.5676	125.167	216.996	292.381	1.49	1.73	1.35	2.49	4.12	5.36	1.52333	3.99	1.38916	8.65e-05	0.00233552
ENSSSCG00000022739	2150.8	3666.82	3397.05	7273.56	6917.66	7200.66	46.19	64.19	59.22	144.73	131.23	131.96	56.5333	135.973	1.26615	1.61e-09	4.56e-07
ENSSSCG00000022780	311.41	626.213	439.127	1044.97	836.977	1134.14	6.69	10.96	7.65	20.79	15.88	20.78	8.43333	19.15	1.18317	8.23e-06	0.000393787
ENSSSCG00000022903	782.119	1838.2	1601.7	2870.13	3216.07	3234.44	16.8	32.18	27.92	57.11	61.01	59.28	25.6333	59.1333	1.20595	3.46e-07	3.16e-05
ENSSSCG00000022948	7293.24	4847.2	2582.81	16237.8	8356.31	12354.5	156.62	84.85	45.02	323.09	158.52	226.42	95.4967	236.01	1.30533	0.00055648	0.00951213
ENSSSCG00000022953	613.086	421.327	364.23	702.132	1153.65	1039.97	13.17	7.38	6.35	13.97	21.89	19.06	8.96667	18.3067	1.02973	0.000743467	0.0117557
ENSSSCG00000022986	273.162	343.651	309.932	679.523	477.719	679.938	5.87	6.02	5.4	13.52	9.06	12.46	5.76333	11.68	1.01906	0.000223627	0.00480546
ENSSSCG00000023178	206.677	165.794	224.81	242.348	763.643	1510.71	4.44	2.9	3.92	4.82	14.49	27.69	3.75333	15.6667	2.06145	1.45e-05	0.000593719
ENSSSCG00000023195	60.9917	95.7722	120.154	202.004	254.102	185.091	1.31	1.68	2.09	4.02	4.82	3.39	1.69333	4.07667	1.26752	9.91e-05	0.00260023
ENSSSCG00000023279	201.707	808.867	652.61	131.893	161.379	316.606	4.33	14.16	11.38	2.62	3.06	5.8	9.95667	3.82667	-1.37957	0.00142829	0.0195101
ENSSSCG00000023320	6023.99	1433.43	333.304	15834.7	13219.5	31333.8	129.37	25.09	5.81	315.07	250.78	574.24	53.4233	380.03	2.83057	0.000121918	0.00305876
ENSSSCG00000023322	141.419	245.013	236.361	107.636	108.657	77.6329	3.04	4.29	4.12	2.14	2.06	1.42	3.81667	1.87333	-1.02671	0.00151179	0.0202958
ENSSSCG00000023324	975.462	2869.81	3501.14	4309.92	4824.86	5872.12	20.95	50.23	61.03	85.76	91.53	107.62	44.07	94.97	1.10767	0.000314354	0.00622902
ENSSSCG00000023379	4199.16	3249.78	2642.35	3135.63	8200.58	11969.4	90.18	56.89	46.06	62.39	155.57	219.36	64.3767	145.773	1.17912	0.00146877	0.0198237
ENSSSCG00000023396	685.983	1126.24	869.477	173.661	315.521	200.195	14.73	19.71	15.16	3.46	5.99	3.67	16.5333	4.37333	-1.91857	1.27e-10	5.64e-08
ENSSSCG00000023434	1090.97	1416.47	1058.62	2508.74	2258.76	2709.06	23.43	24.79	18.45	49.92	42.85	49.65	22.2233	47.4733	1.09504	8.23e-08	1e-05
ENSSSCG00000023546	10438.7	15402.3	9123.63	27436.5	23681.3	40390.3	224.17	269.61	159.04	545.92	449.25	740.21	217.607	578.46	1.41049	2.11e-07	2.15e-05
ENSSSCG00000023584	890.335	1712.08	1168.63	1643.11	4213.37	2536.44	19.12	29.97	20.37	32.69	79.93	46.48	23.1533	53.0333	1.19568	5.94e-05	0.00176148
ENSSSCG00000023630	1045.91	1239.72	646.992	4382.71	3581.24	4014.87	22.46	21.7	11.28	87.21	67.94	73.58	18.48	76.2433	2.04465	2.97e-15	4.63e-12
ENSSSCG00000023706	37.959	193.824	235.785	19.7097	73.1834	58.1466	0.82	3.39	4.11	0.39	1.39	1.07	2.77333	0.95	-1.54562	0.00449183	0.0423137
ENSSSCG00000023842	906.293	1555.25	1231.95	1423.26	3094.95	2729.24	19.46	27.22	21.48	28.32	58.71	50.02	22.72	45.6833	1.00771	0.000130223	0.00320891
ENSSSCG00000023852	163.678	289.367	167.121	27.284	29.265	107.773	3.51	5.07	2.91	0.54	0.56	1.98	3.83	1.02667	-1.89938	6.55e-05	0.00189668
ENSSSCG00000023871	131.302	198.383	186.06	376.695	540.78	511.302	2.82	3.47	3.24	7.5	10.26	9.37	3.17667	9.04333	1.50934	2.17e-07	2.2e-05
ENSSSCG00000023903	8017.48	7191.09	3813.81	4512.92	3064.17	1775.49	172.18	125.88	66.48	89.8	58.13	32.54	121.513	60.1567	-1.01432	0.00467853	0.0433827
ENSSSCG00000023993	283.176	600.381	353.484	600.371	1474.7	822.188	6.08	10.51	6.16	11.95	27.98	15.07	7.58333	18.3333	1.27357	0.000179404	0.00413427
ENSSSCG00000024019	1619.84	1742.44	1597.93	757.872	754.24	793.399	34.79	30.5	27.86	15.08	14.31	14.54	31.05	14.6433	-1.08435	2.33e-07	2.33e-05
ENSSSCG00000024205	407.786	435.279	275.136	957.096	820.254	642.278	8.76	7.62	4.8	19.04	15.56	11.77	7.06	15.4567	1.13049	0.000147939	0.0035335
ENSSSCG00000024300	797.687	1014.22	1245.76	345.894	628.979	382.75	17.13	17.75	21.72	6.88	11.93	7.01	18.8667	8.60667	-1.13231	4.02e-05	0.00133135
ENSSSCG00000024344	468.242	702.718	456.283	550.492	1687.82	1313.81	10.06	12.3	7.95	10.95	32.02	24.08	10.1033	22.35	1.14544	0.000739756	0.0117417
ENSSSCG00000024377	487.965	810.239	511.189	1499.21	1294.77	1620	10.48	14.18	8.91	29.83	24.56	29.69	11.19	28.0267	1.32459	4.36e-08	6.31e-06
ENSSSCG00000024392	71.1767	171.616	151.191	121.172	405.629	432.164	1.53	3	2.64	2.41	7.7	7.92	2.39	6.01	1.33035	0.00230905	0.0273563
ENSSSCG00000024666	368.959	395.032	227.242	162.145	107.2	163.184	7.92	6.91	3.96	3.23	2.03	2.99	6.26333	2.75	-1.1875	0.00060148	0.0100602
ENSSSCG00000024674	84.5955	299.682	288.186	386.495	476.173	589.578	1.82	5.25	5.02	7.69	9.03	10.8	4.03	9.17333	1.18667	0.00164682	0.0215716
ENSSSCG00000024800	4811.88	5915.38	3423.63	10696.7	9676.47	9417.38	103.34	103.55	59.68	212.84	183.57	172.59	88.8567	189.667	1.09391	1.44e-05	0.00059163
ENSSSCG00000024973	4739.25	9191.25	6187.96	8630.43	27723	36722.9	101.78	160.89	107.87	171.72	525.92	673	123.513	456.88	1.88715	1.4e-06	9.3e-05
ENSSSCG00000025038	1213.4	1803.95	971.78	2900.5	3847.78	3718.51	26.06	31.58	16.94	57.71	73	68.15	24.86	66.2867	1.41489	2.5e-09	6.62e-07
ENSSSCG00000025071	7805.62	9603.04	7442.21	15797.8	19492.8	18586.8	167.63	168.1	129.73	314.34	369.79	340.63	155.153	341.587	1.13856	2.77e-07	2.68e-05
ENSSSCG00000025156	465.304	704.706	677.943	1079.06	1352.03	1211.57	9.99	12.34	11.82	21.47	25.65	22.2	11.3833	23.1067	1.02139	6.42e-06	0.000323332
ENSSSCG00000025560	299.113	226.546	295.614	183.361	124.926	87.2166	6.42	3.97	5.15	3.65	2.37	1.6	5.18	2.54	-1.02812	0.0041597	0.0403141
ENSSSCG00000025618	6066.22	8019.43	6872.57	8969.19	21281.7	22159.8	130.27	140.38	119.8	178.47	403.73	406.11	130.15	329.437	1.33983	5.13e-06	0.000271744
ENSSSCG00000025644	981.989	1290.3	963.292	440.187	388.842	510.514	21.09	22.59	16.79	8.76	7.38	9.36	20.1567	8.5	-1.24572	3.05e-07	2.87e-05
ENSSSCG00000025795	140.188	494.541	544.121	112.245	142.761	224.237	3.01	8.66	9.49	2.23	2.71	4.11	7.05333	3.01667	-1.22535	0.0032639	0.0341597
ENSSSCG00000025980	769.361	1407.23	834.721	3881.73	3318.2	3823.71	16.52	24.63	14.55	77.24	62.95	70.08	18.5667	70.09	1.91649	1.11e-16	2.3e-13
ENSSSCG00000026108	5094.68	4953.93	2436.58	2229.41	2053.52	1691.99	109.41	86.72	42.47	44.36	38.96	31.01	79.5333	38.11	-1.06139	0.000284496	0.0057567
ENSSSCG00000026217	66.0255	70.1798	91.6244	151.99	322.038	201.746	1.42	1.23	1.6	3.02	6.11	3.7	1.41667	4.27667	1.59399	6.87e-06	0.000339284
ENSSSCG00000026330	275.856	47.3843	242.916	313.536	301.697	1818.77	5.92	0.83	4.23	6.24	5.72	33.33	3.66	15.0967	2.04431	0.0027184	0.0303933
ENSSSCG00000026733	401.4	806.287	639.904	1151.14	1210.06	1236.13	8.62	14.11	11.15	22.9	22.96	22.65	11.2933	22.8367	1.01588	3.19e-05	0.00112822
ENSSSCG00000026978	965.245	2137.52	1643.86	2175.48	3047.34	6312.09	20.73	37.42	28.66	43.29	57.81	115.68	28.9367	72.26	1.3203	5.25e-05	0.00161292
ENSSSCG00000027022	62.2491	59.941	83.1654	45.5727	13.1044	9.15283	1.34	1.05	1.45	0.91	0.25	0.17	1.28	0.443333	-1.52968	0.00197655	0.0243767
ENSSSCG00000027074	406.897	658.06	490.588	824.848	1085.21	1149.97	8.74	11.52	8.55	16.41	20.59	21.07	9.60333	19.3567	1.01122	3.76e-05	0.00127186
ENSSSCG00000027275	1652.35	3106.8	1937.65	5085.07	4032.24	4738.43	35.48	54.38	33.78	101.18	76.49	86.84	41.2133	88.17	1.09718	1.45e-06	9.53e-05
ENSSSCG00000027340	1610.4	2008.38	1489.7	3387.15	3578.22	3717.21	34.58	35.16	25.97	67.4	67.88	68.12	31.9033	67.8	1.08758	6.35e-08	8.39e-06
ENSSSCG00000027404	820.597	632.982	196.821	2652.14	2139.15	2230.48	17.62	11.08	3.43	52.77	40.58	40.88	10.71	44.7433	2.06271	5.66e-07	4.73e-05
ENSSSCG00000027447	215.941	375.245	253.73	536.969	774.696	583.378	4.64	6.57	4.42	10.68	14.7	10.69	5.21	12.0233	1.20648	3.68e-05	0.00126182
ENSSSCG00000027555	22.0522	16.2437	29.5305	5.05665	10.66	1.13153	0.47	0.28	0.51	0.1	0.2	0.02	0.42	0.106667	-1.97728	0.000213344	0.00463325
ENSSSCG00000027660	2319.44	2539.97	2643.2	3421.42	7420.26	11432.2	49.81	44.46	46.08	68.08	140.77	209.51	46.7833	139.453	1.57572	6.36e-07	5.1e-05
ENSSSCG00000027677	1168.5	732.3	837.703	1777.19	2264.99	1764.8	25.09	12.82	14.6	35.36	42.97	32.34	17.5033	36.89	1.0756	4.22e-05	0.00138559
ENSSSCG00000027709	1204.34	1443	983.907	1905.21	3188.81	4099.25	25.86	25.26	17.15	37.91	60.49	75.13	22.7567	57.8433	1.34586	2.71e-07	2.64e-05
ENSSSCG00000027847	1001.78	1178.65	1176.77	389.003	555.801	319.371	21.51	20.63	20.51	7.74	10.54	5.85	20.8833	8.04333	-1.37649	1.68e-07	1.83e-05
ENSSSCG00000027854	877.219	333.455	61.8299	2841.13	3162.87	1710.7	18.84	5.84	1.08	56.53	60	31.35	8.58667	49.2933	2.52122	9.49e-05	0.00252924
ENSSSCG00000028010	2227.94	2630.88	1633.32	6407.03	4855.03	5514.04	47.85	46.05	28.47	127.48	92.1	101.05	40.79	106.877	1.38966	6.13e-09	1.27e-06
ENSSSCG00000028218	1667.52	2794.63	3173.74	1081.37	772.666	619.547	35.81	48.92	55.33	21.52	14.66	11.35	46.6867	15.8433	-1.55913	3.36e-09	8.08e-07
ENSSSCG00000028277	210.027	209.109	102.355	45.9126	77.6654	70.4759	4.51	3.66	1.78	0.91	1.47	1.29	3.31667	1.22333	-1.43892	0.00023088	0.00492808
ENSSSCG00000028331	55.7525	167.212	162.719	31.2221	21.9112	25.1087	1.2	2.93	2.84	0.62	0.42	0.46	2.32333	0.5	-2.2162	8.18e-08	1e-05
ENSSSCG00000028464	1408.18	2358.85	2044.85	8333.72	5956.64	2913.57	30.24	41.29	35.65	165.82	113	53.4	35.7267	110.74	1.6321	4.45e-07	3.9e-05
ENSSSCG00000028572	426.147	588.874	547.812	1443.11	814.596	763.837	9.15	10.31	9.55	28.71	15.45	14	9.67	19.3867	1.00348	0.00056528	0.0096229
ENSSSCG00000028643	1751.48	3364.41	2232.9	5702.18	5682.19	6023.03	37.61	58.89	38.92	113.46	107.79	110.38	45.14	110.543	1.29213	3.78e-09	8.87e-07
ENSSSCG00000028662	184.868	350.787	311.864	534.295	588.532	721.255	3.97	6.14	5.44	10.63	11.16	13.22	5.18333	11.67	1.17085	3.96e-05	0.00132286
ENSSSCG00000028740	169.403	361.669	273.174	735.682	650.375	704.148	3.64	6.33	4.76	14.64	12.34	12.9	4.91	13.2933	1.43691	6.68e-07	5.23e-05
ENSSSCG00000028896	33.6119	57.357	21.7196	9.84745	7.87745	21.6755	0.72	1	0.38	0.2	0.15	0.4	0.7	0.25	-1.48543	0.00157032	0.0208105
ENSSSCG00000029061	973.294	757.56	539.755	1756.15	1606.83	1579.26	20.9	13.26	9.41	34.94	30.48	28.94	14.5233	31.4533	1.11484	4.89e-05	0.0015366
ENSSSCG00000029077	1055.07	1235.1	710.325	2658.11	2173.1	1720.33	22.66	21.62	12.38	52.89	41.23	31.53	18.8867	41.8833	1.14901	1.77e-05	0.000680373
ENSSSCG00000029196	787.078	2032.81	1974.13	2680.25	3295.35	3477.65	16.9	35.58	34.41	53.33	62.52	63.73	28.9633	59.86	1.04736	5.56e-05	0.00166734
ENSSSCG00000029275	580.002	264.03	327.796	816.437	918.734	833.706	12.46	4.62	5.71	16.25	17.43	15.28	7.59667	16.32	1.1032	0.00106777	0.0154114
ENSSSCG00000029503	55.9843	76.7922	53.0624	20.7003	38.57	25.6194	1.2	1.34	0.92	0.41	0.73	0.47	1.15333	0.536667	-1.10371	0.0030479	0.0326685
ENSSSCG00000029596	1191.88	2042.97	2530.69	2051.86	6074.2	3571.49	25.6	35.76	44.12	40.83	115.23	65.45	35.16	73.8367	1.0704	0.000824003	0.0127378
ENSSSCG00000029998	309.97	490.215	424.507	969.247	787.177	1018.84	6.66	8.58	7.4	19.29	14.93	18.67	7.54667	17.63	1.22412	7.14e-07	5.45e-05
ENSSSCG00000030018	26.0857	58.1943	80.2168	134.961	105.574	117.811	0.56	1.02	1.4	2.69	2	2.16	0.993333	2.28333	1.20079	0.00131729	0.018336
ENSSSCG00000030108	2296.19	3382.65	3619.9	3372.28	9506.57	16413.4	49.31	59.21	63.1	67.1	180.35	300.8	57.2067	182.75	1.67562	1.72e-05	0.000669238
ENSSSCG00000030113	357.231	460.906	563.069	177.216	204.772	251.873	7.67	8.07	9.82	3.53	3.88	4.62	8.52	4.01	-1.08725	0.000139318	0.00337949
ENSSSCG00000030262	1382.31	2711.99	1894.12	9098.5	6548.95	9320.37	29.69	47.47	33.02	181.04	124.24	170.81	36.7267	158.697	2.11137	1.29e-17	4.02e-14
ENSSSCG00000030300	17073.9	12239.6	1886.01	3155.07	4581.8	2995.77	366.66	214.25	32.88	62.78	86.92	54.9	204.597	68.2	-1.58494	0.0035459	0.0361386
ENSSSCG00000030354	164.292	498.108	465.811	990.382	944.242	1230.01	3.53	8.72	8.12	19.71	17.91	22.54	6.79	20.0533	1.56236	8.58e-07	6.24e-05
ENSSSCG00000030408	947.746	1211.97	1177.28	1261.68	3680.95	8190.57	20.35	21.21	20.52	25.1	69.83	150.1	20.6933	81.6767	1.98076	5.47e-06	0.000287019
ENSSSCG00000030467	313.518	866.356	932.557	1712.55	1672.2	2525.19	6.73	15.17	16.26	34.08	31.72	46.28	12.72	37.36	1.5544	2.92e-07	2.78e-05
ENSSSCG00000030548	549.269	713.27	555.714	925.355	3708.44	6027.84	11.8	12.49	9.69	18.41	70.35	110.47	11.3267	66.41	2.55168	1e-08	1.92e-06
ENSSSCG00000030560	510.755	915.58	831.128	1333.52	1569.22	1468.76	10.97	16.03	14.49	26.53	29.77	26.92	13.83	27.74	1.00417	7.62e-06	0.000370514
ENSSSCG00000030706	791.354	700.147	1444.72	498.416	404.261	251.042	16.99	12.26	25.18	9.92	7.67	4.6	18.1433	7.39667	-1.29449	9.33e-05	0.00249573
ENSSSCG00000030801	2122.37	3276.09	2395.95	2959.34	7852.45	13262.9	45.58	57.35	41.77	58.88	148.97	243.06	48.2333	150.303	1.63977	1.11e-05	0.000483992
ENSSSCG00000030901	67.0799	226.836	120.227	208.002	279.322	342.181	1.44	3.97	2.1	4.14	5.3	6.27	2.50333	5.23667	1.0648	0.00534937	0.047379
ENSSSCG00000030921	52321	45872.6	27307.8	72798.3	60979.9	159240	1123.6	802.98	476.03	1448.51	1156.83	2918.31	800.87	1841.22	1.20102	0.000924039	0.0139548
ENSSSCG00000031177	5024.05	578825	234554	292.785	46.8517	13569.6	107.89	10132.1	4088.79	5.83	0.89	248.68	4776.25	85.1333	-5.81001	0.000220126	0.00475565
ENSSSCG00000031267	95.8413	215.421	190.937	259.943	393.127	484.448	2.06	3.77	3.33	5.17	7.46	8.88	3.05333	7.17	1.23159	0.000257561	0.00530644
ENSSSCG00000031292	160.977	51.0012	84.6868	525.214	2783.89	576.243	3.46	0.89	1.48	10.45	52.81	10.56	1.94333	24.6067	3.66244	5.77e-09	1.24e-06
ENSSSCG00000031448	0	0	0	7.10748	7.05148	5.16316	0	0	0	0.14	0.13	0.09	0.001	0.12	6.90689	1.46e-05	0.000593719
ENSSSCG00000031495	39.8091	62.6295	81.3231	91.0838	239.389	162.071	0.85	1.1	1.42	1.81	4.54	2.97	1.12333	3.10667	1.46758	0.000162324	0.00381126
ENSSSCG00000031590	207.72	120.814	105.914	461.778	526.275	663.278	4.46	2.11	1.85	9.19	9.98	12.16	2.80667	10.4433	1.89565	1.7e-07	1.84e-05
ENSSSCG00000031706	511.354	904.398	557.718	1821.77	1272.36	1486.8	10.98	15.83	9.72	36.25	24.14	27.25	12.1767	29.2133	1.26251	7.67e-07	5.79e-05
ENSSSCG00000031751	37.1577	26.3121	23.5001	70.7722	59.6451	56.0806	0.8	0.46	0.41	1.41	1.13	1.03	0.556667	1.19	1.09608	0.00360938	0.0366654
ENSSSCG00000031865	5274.92	2787.62	1415.36	35699.2	11231.3	15011.3	113.28	48.8	24.67	710.33	213.07	275.11	62.25	399.503	2.68206	1.95e-07	2.05e-05
ENSSSCG00000032108	127.17	231.917	92.0565	210.685	332.87	399.497	2.73	4.06	1.6	4.19	6.31	7.32	2.79667	5.94	1.08675	0.00378033	0.0378763
ENSSSCG00000032123	200.429	214.348	234.187	0.00631855	0	28.0213	4.3	3.75	4.08	0	0	0.51	4.04333	0.17	-4.57194	4.12e-07	3.68e-05
ENSSSCG00000032343	209.548	197.498	139.196	369.177	842.528	841.414	4.5	3.46	2.43	7.35	15.98	15.42	3.46333	12.9167	1.899	1.64e-07	1.82e-05
ENSSSCG00000032360	425.735	831.459	721.085	1888.97	1642.75	2172.9	9.14	14.55	12.57	37.59	31.16	39.82	12.0867	36.19	1.58217	1.47e-11	8.34e-09
ENSSSCG00000032374	3268.01	3339.95	2156.73	5508.4	5194.17	6810.8	70.18	58.46	37.6	109.6	98.54	124.82	55.4133	110.987	1.00208	2.51e-05	0.0009126
ENSSSCG00000032413	314.201	113.117	289.861	8.23152	0	37.8686	6.75	1.98	5.05	0.16	0	0.69	4.59333	0.283333	-4.01897	6.42e-07	5.12e-05
ENSSSCG00000032456	123.426	348.589	158.396	786.018	426.011	614.763	2.65	6.1	2.76	15.64	8.08	11.27	3.83667	11.6633	1.60405	2.67e-05	0.000964385
ENSSSCG00000032474	680.702	890.992	498.373	827.093	4320.19	12569.8	14.62	15.6	8.69	16.46	81.96	230.36	12.97	109.593	3.07891	6.47e-07	5.13e-05
ENSSSCG00000032527	1346.71	2210.1	1298.54	4546.03	2468.11	3054.89	28.92	38.69	22.64	90.46	46.82	55.99	30.0833	64.4233	1.09862	4.37e-05	0.00141474
ENSSSCG00000032531	614.693	1979.49	2001.34	3708.48	4697.17	5396.16	13.2	34.65	34.89	73.79	89.11	98.89	27.58	87.2633	1.66175	7.5e-08	9.33e-06
ENSSSCG00000032588	1507.13	1059.85	3383.41	3402.85	6454.05	9475.58	32.37	18.55	58.98	67.71	122.44	173.65	36.6333	121.267	1.72695	6.75e-06	0.000334463
ENSSSCG00000032632	492.33	632.637	450.045	1477.33	1290.29	1361.21	10.57	11.07	7.85	29.4	24.48	24.95	9.83	26.2767	1.41852	2.06e-09	5.7e-07
ENSSSCG00000032702	643.18	1622.44	1192.64	2972.05	2685.25	3482.62	13.81	28.4	20.79	59.14	50.94	63.82	21	57.9667	1.46483	5.02e-09	1.12e-06
ENSSSCG00000032715	2406.68	1552.95	1158.6	5385.45	2920.5	2865.68	51.68	27.18	20.2	107.16	55.4	52.52	33.02	71.6933	1.1185	0.000998961	0.0147813
ENSSSCG00000032765	915.023	1092.97	380.446	2562.85	1406.22	1650.86	19.65	19.13	6.63	50.99	26.68	30.25	15.1367	35.9733	1.24888	0.000520154	0.00912948
ENSSSCG00000032777	447.989	425.679	346.447	702.303	4326.11	4547.34	9.62	7.45	6.04	13.97	82.07	83.34	7.70333	59.7933	2.95643	1.03e-09	3.01e-07
ENSSSCG00000032931	106.149	258.668	192.948	460.934	740.721	828.377	2.28	4.53	3.36	9.17	14.05	15.18	3.39	12.8	1.91679	1.16e-08	2.15e-06
ENSSSCG00000032963	6.86622	20.4088	14.7932	22.717	130.99	149.578	0.15	0.36	0.26	0.45	2.48	2.74	0.256667	1.89	2.88042	6.05e-07	4.95e-05
ENSSSCG00000033000	400.681	128.819	100.015	539.53	735.452	619.797	8.6	2.25	1.74	10.74	13.95	11.36	4.19667	12.0167	1.51772	0.00184658	0.0232344
ENSSSCG00000033003	521	824.68	696.989	192.856	128.876	356.711	11.19	14.44	12.15	3.84	2.44	6.54	12.5933	4.27333	-1.55923	9.1e-06	0.000424055
ENSSSCG00000033010	4271.36	6354.92	5822.5	18665.4	14340	15644.2	91.73	111.24	101.5	371.4	272.04	286.7	101.49	310.047	1.61115	1.59e-12	1.41e-09
ENSSSCG00000033043	192.718	271.269	276.662	600.115	762.491	383.886	4.14	4.75	4.82	11.94	14.46	7.04	4.57	11.1467	1.28635	5.14e-05	0.00159081
ENSSSCG00000033089	2157.66	5893.02	3729.64	5582.35	11564.2	20749	46.34	103.15	65.02	111.08	219.38	380.26	71.5033	236.907	1.72824	9.4e-06	0.00043015
ENSSSCG00000033222	286.871	602.062	463.051	985.152	1736.66	1841.15	6.16	10.54	8.07	19.6	32.95	33.74	8.25667	28.7633	1.8006	2.59e-10	9.75e-08
ENSSSCG00000033326	76959	74097.6	37576.2	24720.5	30654.5	22230.7	1652.7	1297.05	655.03	491.88	581.54	407.41	1201.59	493.61	-1.28351	3.62e-05	0.00125257
ENSSSCG00000033414	10417.5	10617.9	8238.14	23274.1	24932.2	26398.1	223.72	185.86	143.61	463.1	472.98	483.79	184.397	473.29	1.35991	7.12e-09	1.43e-06
ENSSSCG00000033442	251.22	241.769	186.474	688.502	411.364	332.957	5.39	4.23	3.25	13.7	7.8	6.1	4.29	9.2	1.10066	0.00182888	0.0231286
ENSSSCG00000033451	394.168	662.366	1446.39	135.76	351.751	384.281	8.46	11.59	25.21	2.7	6.67	7.04	15.0867	5.47	-1.46366	0.000617298	0.0102559
ENSSSCG00000033457	183.796	134.817	119.868	44.3511	66.2635	69.9734	3.95	2.36	2.09	0.88	1.26	1.28	2.8	1.14	-1.29639	0.000330966	0.0064666
ENSSSCG00000033613	634.097	815.473	653.666	604.643	1353.73	2628.39	13.62	14.27	11.39	12.03	25.68	48.17	13.0933	28.6267	1.12853	0.00228633	0.02726
ENSSSCG00000033763	625.423	1314.99	1005.47	2023.67	2456.13	2546.75	13.43	23.02	17.53	40.27	46.59	46.67	17.9933	44.51	1.30667	1.54e-08	2.78e-06
ENSSSCG00000033858	781.571	902.096	323.799	127.705	342.538	364.718	16.78	15.79	5.64	2.54	6.5	6.68	12.7367	5.24	-1.28135	0.0031792	0.033607
ENSSSCG00000033860	194.047	414.163	456.232	698.967	768.612	966.492	4.17	7.25	7.95	13.91	14.58	17.71	6.45667	15.4	1.25407	1.74e-05	0.00067332
ENSSSCG00000034087	396.002	397.94	231.376	1560.99	709.463	944.12	8.5	6.97	4.03	31.06	13.46	17.3	6.5	20.6067	1.6646	1.82e-06	0.000116048
ENSSSCG00000034102	762.327	219.908	131.976	1050.27	991.982	1264.13	16.37	3.85	2.3	20.9	18.82	23.17	7.50667	20.9633	1.48162	0.00413853	0.040161
ENSSSCG00000034191	294.871	416.343	229.165	634.463	613.577	1175.88	6.33	7.29	3.99	12.62	11.64	21.55	5.87	15.27	1.37927	2.01e-05	0.000763087
ENSSSCG00000034242	6964.03	12453.5	9427.65	18848.5	19539.9	20085.1	149.55	217.99	164.34	375.04	370.68	368.09	177.293	371.27	1.06633	2.72e-06	0.000167548
ENSSSCG00000034278	6714.39	6441.69	3549.89	17151.2	11853.6	15756.8	144.19	112.76	61.88	341.27	224.87	288.77	106.277	284.97	1.42299	1.74e-06	0.000112262
ENSSSCG00000034570	3285.01	2604.35	2486.71	2979.76	11900	19368.5	70.55	45.59	43.35	59.29	225.75	354.96	53.1633	213.333	2.00461	1.23e-05	0.000522027
ENSSSCG00000034639	35120	28663.1	14445.2	64290.5	45099.3	67506.2	754.2	501.74	251.81	1279.23	855.56	1237.16	502.583	1123.98	1.16119	0.000570815	0.00967742
ENSSSCG00000034735	649.701	1214.71	528.653	4597.73	1890.93	4406.86	13.95	21.26	9.22	91.48	35.87	80.76	14.81	69.37	2.22774	1.97e-10	7.9e-08
ENSSSCG00000034765	221.274	347.861	238.086	501.797	466.945	646.014	4.75	6.09	4.15	9.98	8.86	11.84	4.99667	10.2267	1.0333	0.000325686	0.00639248
ENSSSCG00000034802	160.907	234.252	248.564	336.073	1197.49	1975.47	3.46	4.1	4.33	6.69	22.72	36.2	3.96333	21.87	2.46417	4.78e-08	6.68e-06
ENSSSCG00000034853	100.721	310.94	375.737	549.673	399.235	727.936	2.16	5.44	6.55	10.94	7.57	13.34	4.71667	10.6167	1.17049	0.00258284	0.0296502
ENSSSCG00000034919	873.304	1198.85	897.53	4213.73	3242.08	3789.72	18.75	20.99	15.65	83.84	61.5	69.45	18.4633	71.5967	1.95523	3.25e-20	2.02e-16
ENSSSCG00000034976	2699.22	1631.32	933.327	9676.92	3512.63	3567.36	57.97	28.56	16.27	192.55	66.64	65.38	34.2667	108.19	1.65869	0.000226223	0.00484529
ENSSSCG00000035053	1542.81	30319.3	14478.4	2163.47	906.413	5456.18	33.13	530.73	252.39	43.05	17.2	99.99	272.083	53.4133	-2.34878	0.0010639	0.0153944
ENSSSCG00000035081	182.716	211.993	261.764	540.441	437.294	383.967	3.92	3.71	4.56	10.75	8.3	7.04	4.06333	8.69667	1.0978	0.000195209	0.00435338
ENSSSCG00000035147	742.706	719.42	561.305	390.301	289.644	314.18	15.95	12.59	9.78	7.77	5.49	5.76	12.7733	6.34	-1.01058	0.000433083	0.00798413
ENSSSCG00000035189	3066.33	5247.3	2602.62	12540.7	5601.25	7254.45	65.85	91.85	45.37	249.53	106.26	132.95	67.69	162.913	1.26709	0.000112498	0.00286283
ENSSSCG00000035196	466.812	638.343	401.594	1221.76	1138.09	1064.26	10.02	11.17	7	24.31	21.59	19.5	9.39667	21.8	1.21411	1.56e-06	0.000101941
ENSSSCG00000035223	296.197	757.124	400.461	1203.16	1223.15	1006.24	6.36	13.25	6.98	23.94	23.2	18.44	8.86333	21.86	1.30237	1.23e-05	0.000522027
ENSSSCG00000035224	3486.34	3529.43	4776.83	1284.33	1509.27	1541.43	74.87	61.78	83.27	25.56	28.63	28.25	73.3067	27.48	-1.41556	2.61e-12	2.17e-09
ENSSSCG00000035243	579.285	931.089	868.306	1806.1	1839	2041.86	12.44	16.3	15.14	35.94	34.89	37.42	14.6267	36.0833	1.30273	4.17e-10	1.37e-07
ENSSSCG00000035297	10587.1	4367.07	2696.75	15613.9	38666.8	31151	227.36	76.44	47.01	310.68	733.54	570.89	116.937	538.37	2.20287	4.09e-06	0.00022878
ENSSSCG00000035337	558.505	379.358	234.022	142.739	146.627	116.978	11.99	6.64	4.08	2.84	2.78	2.14	7.57	2.58667	-1.5492	6.14e-05	0.00180357
ENSSSCG00000035347	284.678	108.139	179.464	436.894	611.356	717.068	6.11	1.89	3.13	8.69	11.6	13.14	3.71	11.1433	1.58669	5.27e-05	0.00161292
ENSSSCG00000035355	96.4623	211.412	158.988	209.804	414.999	422.459	2.07	3.7	2.77	4.17	7.87	7.74	2.84667	6.59333	1.21173	0.000542599	0.00941548
ENSSSCG00000035366	522.8	840.297	611.285	1692.61	1318.4	1372.53	11.23	14.71	10.66	33.68	25.01	25.15	12.2	27.9467	1.1958	4.2e-07	3.74e-05
ENSSSCG00000035592	295.611	646.554	715.839	664.606	1525.01	1070.52	6.35	11.32	12.48	13.22	28.93	19.62	10.05	20.59	1.03475	0.00143101	0.0195258
ENSSSCG00000035912	1426.39	2407.47	919.308	2676.13	3546.82	4173.09	30.63	42.14	16.03	53.25	67.29	76.48	29.6	65.6733	1.14971	9.71e-05	0.00255484
ENSSSCG00000036095	417.574	696.304	209.858	2308.87	1083.87	1700.27	8.97	12.19	3.66	45.94	20.56	31.16	8.27333	32.5533	1.97626	3.25e-07	2.99e-05
ENSSSCG00000036270	18.9296	28.3279	31.9944	9.91724	14.6414	7.65037	0.41	0.5	0.56	0.2	0.28	0.14	0.49	0.206667	-1.24548	0.00531802	0.0472021
ENSSSCG00000036383	3201.56	2513.82	2987.69	3155.87	7487.48	11300.8	68.75	44	52.08	62.79	142.04	207.1	54.9433	137.31	1.32142	0.000106358	0.00274588
ENSSSCG00000036445	22236	31767.3	40794.9	10817.7	13060.1	19779.7	477.52	556.07	711.14	215.25	247.76	362.49	581.577	275.167	-1.07966	4.11e-05	0.00135559
ENSSSCG00000036449	947.299	2063.48	965.746	3647.41	1711.24	3890.47	20.34	36.12	16.84	72.57	32.46	71.3	24.4333	58.7767	1.26639	0.000101866	0.00265192
ENSSSCG00000036743	186.171	350.74	75.6145	332.028	538.332	700.315	4	6.14	1.32	6.61	10.21	12.83	3.82	9.88333	1.37143	0.00267348	0.0301348
ENSSSCG00000036755	644.207	548.362	588.676	1534.66	890.941	1247.75	13.83	9.6	10.26	30.54	16.9	22.87	11.23	23.4367	1.06141	8.59e-05	0.00232955
ENSSSCG00000037125	415.205	550.184	316.751	1037.93	786.799	926.878	8.92	9.63	5.52	20.65	14.93	16.99	8.02333	17.5233	1.127	4.53e-05	0.00145358
ENSSSCG00000037358	37899.4	53594.8	19120.1	13104.7	1298.84	3583.07	813.89	938.15	333.3	260.75	24.64	65.67	695.113	117.02	-2.57049	4.36e-05	0.00141474
ENSSSCG00000037396	2229.42	1372	873.256	571.013	149.946	303.662	47.88	24.02	15.22	11.36	2.84	5.57	29.04	6.59	-2.13969	4.57e-06	0.000248326
ENSSSCG00000037416	2249.5	3047.6	2311.38	6351.39	5648.52	7173.39	48.31	53.35	40.29	126.38	107.16	131.46	47.3167	121.667	1.36251	3.09e-11	1.58e-08
ENSSSCG00000037514	292.927	361.517	234.999	892.891	407.113	786.792	6.29	6.33	4.1	17.77	7.72	14.42	5.57333	13.3033	1.25518	0.000184848	0.00422065
ENSSSCG00000037521	29.5043	35.6331	3.03689	1073.89	562.845	444.011	0.63	0.62	0.05	21.37	10.68	8.14	0.433333	13.3967	4.95025	5.12e-15	7.08e-12
ENSSSCG00000037582	169.387	163.035	193.62	356.808	354.53	340.793	3.64	2.85	3.38	7.1	6.73	6.25	3.29	6.69333	1.02464	0.000324555	0.00639248
ENSSSCG00000037583	214.513	660.993	534.135	692.06	1133.93	1213.11	4.61	11.57	9.31	13.77	21.51	22.23	8.49667	19.17	1.17388	0.000342663	0.0066419
ENSSSCG00000037617	120.251	302.71	310.249	561.534	404.719	477.501	2.58	5.3	5.41	11.17	7.68	8.75	4.43	9.2	1.05433	0.00170321	0.0220319
ENSSSCG00000037620	1087.78	717047	934785	96.7975	38.8323	3241.93	23.36	12551.6	16295.3	1.93	0.74	59.41	9623.43	20.6933	-8.86124	1.22e-06	8.39e-05
ENSSSCG00000037635	44.9102	38.5904	21.4546	388.113	340.229	325.323	0.96	0.68	0.37	7.72	6.45	5.96	0.67	6.71	3.32408	2.79e-18	1.16e-14
ENSSSCG00000037766	886.102	1070.76	512.565	2387.94	2091.74	1793.34	19.03	18.74	8.94	47.51	39.68	32.87	15.57	40.02	1.36195	1.36e-06	9.1e-05
ENSSSCG00000037808	2143.69	6696.11	5099.83	9492.68	10054.7	8310.75	46.04	117.21	88.9	188.88	190.74	152.31	84.05	177.31	1.07695	0.000285547	0.00575907
ENSSSCG00000037878	65.9769	20.0484	34.677	5.93984	1.01427	11.3341	1.42	0.35	0.6	0.12	0.02	0.21	0.79	0.116667	-2.75946	4.01e-06	0.00022691
ENSSSCG00000037987	1769.75	1243.93	669.475	2990.86	2905.79	3700.94	38.01	21.77	11.67	59.51	55.12	67.83	23.8167	60.82	1.35257	2.79e-05	0.000999046
ENSSSCG00000038056	92.7627	222.421	215.617	479.341	480.566	552.629	1.99	3.89	3.76	9.54	9.12	10.13	3.21333	9.59667	1.57846	8.74e-07	6.32e-05
ENSSSCG00000038135	112.692	98.0315	170.899	201.005	255.713	316.398	2.42	1.72	2.98	4	4.85	5.8	2.37333	4.88333	1.04095	0.00145852	0.019752
ENSSSCG00000038238	24.5799	43.2994	19.0027	120.87	129.44	80.6546	0.53	0.76	0.33	2.41	2.46	1.48	0.54	2.11667	1.97076	6.16e-07	5.01e-05
ENSSSCG00000038275	777.524	302.15	339.085	3079.48	7255.76	331.451	16.7	5.29	5.91	61.27	137.65	6.07	9.3	68.33	2.87722	7.96e-05	0.00219379
ENSSSCG00000038300	44544.2	46104.6	24153.2	64348.3	75272.2	151051	956.59	807.04	421.04	1280.38	1427.96	2768.25	728.223	1825.53	1.32586	0.000122565	0.00306882
ENSSSCG00000038384	549.326	609.724	1006.42	290.009	360.607	341.874	11.8	10.67	17.54	5.77	6.84	6.27	13.3367	6.29333	-1.0835	0.000121077	0.00304381
ENSSSCG00000038398	253.02	456.818	389.021	315.055	1088.31	876.342	5.43	8	6.78	6.27	20.65	16.06	6.73667	14.3267	1.0886	0.0034315	0.035349
ENSSSCG00000038507	31948.9	32096	15578	13408.7	12757.8	8270.35	686.1	561.83	271.56	266.8	242.02	151.57	506.497	220.13	-1.2022	0.000223977	0.00480546
ENSSSCG00000038730	3951.56	5361.7	3920.43	10608.2	9060	8797.17	84.86	93.85	68.34	211.08	171.87	161.22	82.35	181.39	1.13925	4.78e-07	4.13e-05
ENSSSCG00000038869	488.572	387.934	354.11	773.02	769.722	1159.69	10.49	6.79	6.17	15.38	14.6	21.25	7.81667	17.0767	1.1274	6.11e-05	0.00180027
ENSSSCG00000039009	154.417	261.81	236.378	400.455	449.578	420.814	3.32	4.58	4.12	7.97	8.53	7.71	4.00667	8.07	1.01017	0.000378689	0.00716172
ENSSSCG00000039045	275.721	634.871	836.896	1183.79	1200.61	1173.61	5.92	11.11	14.59	23.55	22.78	21.51	10.54	22.6133	1.1013	0.000213169	0.00463325
ENSSSCG00000039244	18631.5	33791.5	5975.49	5890.36	2915.2	2656.43	400.11	591.51	104.17	117.2	55.3	48.68	365.263	73.7267	-2.30868	2.8e-06	0.000170839
ENSSSCG00000039563	201.697	242.64	130.426	303.251	481.964	386.773	4.33	4.25	2.27	6.03	9.14	7.09	3.61667	7.42	1.03676	0.00187422	0.0234636
ENSSSCG00000039651	644.82	596.874	271.964	1377.34	1480.37	1405.36	13.85	10.45	4.74	27.41	28.08	25.76	9.68	27.0833	1.48433	3.83e-06	0.000220772
ENSSSCG00000039751	1275.49	2105.47	1727.5	2693.75	4852.75	6143.47	27.39	36.86	30.11	53.6	92.06	112.59	31.4533	86.0833	1.45252	2.49e-08	4.02e-06
ENSSSCG00000039854	3747.92	5051.92	2120.96	8803.03	5514.93	7347.64	80.49	88.43	36.97	175.16	104.62	134.66	68.63	138.147	1.00929	0.0009083	0.0137672
ENSSSCG00000039961	500.165	377.621	472.523	217.062	226.698	155.089	10.74	6.61	8.24	4.32	4.3	2.84	8.53	3.82	-1.15897	0.000234283	0.00498363
ENSSSCG00000040197	351.419	387.52	88.5161	2223.23	2635.1	924.184	7.55	6.78	1.54	44.24	49.99	16.94	5.29	37.0567	2.80839	2.07e-08	3.44e-06
ENSSSCG00000040321	0	0	0	153.454	437.139	334.359	0	0	0	3.05	8.29	6.13	0.001	5.82333	12.5076	5.62e-39	6.99e-35
ENSSSCG00000040348	78.0639	70.2149	496.818	46.3078	55.7199	42.8483	1.68	1.23	8.66	0.92	1.06	0.79	3.85667	0.923333	-2.06243	0.000543259	0.00941548
ENSSSCG00000040377	1316.58	3576.59	2151.8	211.155	1592.45	759.881	28.27	62.61	37.51	4.2	30.21	13.93	42.7967	16.1133	-1.40924	0.00420421	0.0405466
ENSSSCG00000040406	784.664	671.345	371.1	343.735	273.133	209.918	16.85	11.75	6.47	6.84	5.18	3.85	11.69	5.29	-1.14394	0.00164301	0.0215444
ENSSSCG00000040433	85.6846	120.805	226.109	258.298	274.409	314.26	1.84	2.11	3.94	5.14	5.21	5.76	2.63	5.37	1.02986	0.00274774	0.0305945
ENSSSCG00000040465	320.348	492.346	461.647	949.995	1642.82	1027.39	6.88	8.62	8.05	18.9	31.17	18.83	7.85	22.9667	1.54878	9.08e-09	1.76e-06
ENSSSCG00000040575	969.052	991.121	870.997	1370.41	5277.83	16077.9	20.81	17.35	15.18	27.27	100.12	294.65	17.78	140.68	2.98409	1.42e-07	1.62e-05
ENSSSCG00000040615	6500.51	4808.36	1996.06	13126.8	9681.42	12981.9	139.6	84.17	34.8	261.19	183.66	237.91	86.19	227.587	1.40082	0.000186942	0.00423751
ENSSSCG00000040673	1013.02	1376.05	794.922	2061.61	1873.45	2929.49	21.75	24.09	13.86	41.02	35.54	53.69	19.9	43.4167	1.12548	5.8e-06	0.000298073
ENSSSCG00000040689	1637.48	3838.7	5686.75	12314.9	2943.59	14381.4	35.17	67.19	99.13	245.04	55.84	263.56	67.1633	188.147	1.48611	0.00149613	0.0201273
ENSSSCG00000040940	3.53131	2.70552	10.1421	0	0	2.25867	0.08	0.05	0.18	0	0	0.04	0.103333	0.0133333	-2.9542	0.00408879	0.0399066
ENSSSCG00000041364	1000.44	2530.33	1771.04	2833.39	4274.21	3998.95	21.48	44.29	30.87	56.38	81.08	73.29	32.2133	70.25	1.12484	1.49e-05	0.00060336
ENSSSCG00000042498	1.78804	10.4018	3.28567	14.8296	26.2711	15.6944	0.04	0.18	0.06	0.3	0.5	0.29	0.0933333	0.363333	1.96083	0.000443885	0.00812309
ENSSSCG00000044512	22.0233	83.0699	68.0417	107.932	228.945	153.039	0.47	1.45	1.19	2.15	4.34	2.8	1.03667	3.09667	1.57876	0.000194317	0.00434682
ENSSSCG00000044574	719.224	521.674	186.458	997.262	3034.05	972.512	15.45	9.13	3.25	19.84	57.56	17.82	9.27667	31.74	1.77462	0.000383994	0.00724003
ENSSSCG00000044690	262.25	398.18	358.922	675.441	716.042	624.065	5.63	6.97	6.26	13.44	13.58	11.44	6.28667	12.82	1.02803	6.58e-05	0.00190103
ENSSSCG00000045919	32.4933	158.777	226.568	399.598	437.691	498.529	0.7	2.78	3.95	7.95	8.3	9.14	2.47667	8.46333	1.77283	0.000125654	0.00312728
ENSSSCG00000046640	4126.56	3912.54	3306.37	3673.96	9049.19	21503.6	88.62	68.49	57.64	73.1	171.67	394.09	71.5833	212.953	1.57284	0.000311916	0.00620044
ENSSSCG00000047900	41.0506	34.5053	61.4871	106.778	74.1302	90.416	0.88	0.6	1.07	2.12	1.41	1.66	0.85	1.73	1.02524	0.00407639	0.0398168
ENSSSCG00000047922	17.1122	15.415	9.0165	30.2827	34.1279	36.2623	0.37	0.27	0.16	0.6	0.65	0.66	0.266667	0.636667	1.2555	0.00264657	0.0300395
ENSSSCG00000048680	161.921	65.4413	80.7987	1011.46	293.817	321.844	3.48	1.15	1.41	20.13	5.57	5.9	2.01333	10.5333	2.3873	8.6e-06	0.000408682
ENSSSCG00000049415	6.84095	30.0458	31.5683	39.515	58.1053	51.368	0.15	0.53	0.55	0.79	1.1	0.94	0.41	0.943333	1.20214	0.0049662	0.0450105
ENSSSCG00000049618	32.003	35.678	83.7566	203.505	85.752	86.6101	0.69	0.62	1.46	4.05	1.63	1.59	0.923333	2.42333	1.39207	0.00244529	0.0284651
ENSSSCG00000050094	1650.91	1127.99	820.588	735.622	426.913	299	35.45	19.75	14.3	14.64	8.1	5.48	23.1667	9.40667	-1.30029	0.000579054	0.00979042
ENSSSCG00000050398	56.017	276.744	308.44	532.149	750.145	698.95	1.2	4.84	5.38	10.59	14.23	12.81	3.80667	12.5433	1.72032	8.3e-05	0.00226392
ENSSSCG00000050594	6.5229	0	17.0569	63.6758	63.2322	105.98	0.14	0	0.3	1.27	1.2	1.94	0.146667	1.47	3.3252	4.38e-10	1.4e-07
